# Supplementary material for: Longevity-Promoting Pathways and Transcription Factors Respond to and Control Extracellular Matrix Dynamics During Aging and Disease
Source: Front Aging. 2022 Jul 7;3:935220. doi: 10.3389/fragi.2022.935220 (PMC9301135; doi:10.3389/fragi.2022.935220)
Supplement: Supplementary file 1 [file DataSheet1.xlsx]

## Sheet: list of matrisome genes
Division	Category	Gene Symbol	Gene Name	Synonyms	HGNC_IDs	HGNC_IDs Links	UniProt_IDs	Refseq_IDs	Orthology	Notes
Core matrisome	ECM Glycoproteins	ABI3BP	ABI family, member 3 (NESH) binding protein	FLJ41743|FLJ41754|NESHBP|TARSH	17265	17265	B4DSV9:D3YTG3:E9PPR9:E9PRB5:H0Y897:H0YCG4:H0YCP4:H0YDN0:H0YDW0:H0YEA0:H0YEL2:H0YF18:H0YF57:H7C4H3:H7C4N5:H7C4S3:H7C4T1:H7C4X4:H7C524:H7C556:H7C5S3:Q5JPC9:Q7Z7G0	NP_056244.2:XP_005247340.1	Mouse:Abi3bp|
Core matrisome	ECM Glycoproteins	ADIPOQ	adiponectin, C1Q and collagen domain containing	ACDC|ACRP30|ADIPQTL1|ADPN|APM-1|APM1|GBP28|adipone	13633	13633	Q15848	NP_001171271.1:NP_004788.1	Mouse:Adipoq|
Core matrisome	ECM Glycoproteins	AEBP1	AE binding protein 1	ACLP; FLJ33612	303	303	C9JLQ8:H7C0W8:H7C1J5:H7C391:H7C3D7:H7C4B5:Q8IUX7	NP_001120.3	Mouse:Aebp1|
Core matrisome	ECM Glycoproteins	AGRN	agrin	FLJ45064	329	329	H0Y5U1:O00468	NP_940978.2:XP_005244806.1:XP_006710696.1	Mouse:Agrn|
Core matrisome	ECM Glycoproteins	AMBN	ameloblastin (enamel matrix protein)	-	452	452	Q9NP70	NP_057603.1	Mouse:Ambn|
Core matrisome	ECM Glycoproteins	AMELX	amelogenin (amelogenesis imperfecta 1, X-linked)	AIH1|ALGN|AMG|AMGL|AMGX	461	461	Q99217	NP_001133.1:NP_872621.1:NP_872622.1	Mouse:Amelx|
Core matrisome	ECM Glycoproteins	AMELY	amelogenin, Y-linked	AMGL|AMGY	462	462	J3KPK5:Q99218	NP_001134.1
Core matrisome	ECM Glycoproteins	BGLAP	bone gamma-carboxyglutamate (gla) protein	BGP|OC|PMF1	1043	1043	P02818	NP_954642.1	Mouse:Bglap2|
Core matrisome	ECM Glycoproteins	BMPER	BMP binding endothelial regulator	CRIM3|CV-2|CV2	24154	24154	C9JY72:F8WDG9:G5E9K4:Q8N8U9	NP_597725.1	Mouse:Bmper|	Growth Factor-binding
Core matrisome	ECM Glycoproteins	BSPH1	binder of sperm protein homolog 1	BSP1|ELSPBP2	33906	33906	Q075Z2	NP_001121798.1	Mouse:Bsph1|
Core matrisome	ECM Glycoproteins	CDCP2	CUB domain containing protein 2	-	27297	27297	Q5VXM1	NP_963840.2	Mouse:Cdcp2|
Core matrisome	ECM Glycoproteins	CILP	cartilage intermediate layer protein, nucleotide pyrophosphohydrolase	CILP-1|HsT18872	1980	1980	O75339	NP_003604.3	Mouse:Cilp|
Core matrisome	ECM Glycoproteins	CILP2	cartilage intermediate layer protein 2	CLIP-2|MGC45771	24213	24213	K7EPJ4:Q8IUL8	NP_694953.2	Mouse:Cilp2|
Core matrisome	ECM Glycoproteins	COCH	coagulation factor C homolog, cochlin (Limulus polyphemus)	COCH-5B2|COCH5B2|DFNA9	2180	2180	E7EN67:G3V4C4:G3V5G6:G3V5V4:G3V5X3:H0YJJ0:H0YJW4:O43405:Q96IU6	NP_001128530.1:NP_004077.1:XP_006720136.1	Mouse:Coch|
Core matrisome	ECM Glycoproteins	COLQ	collagen-like tail subunit (single strand of homotrimer) of asymmetric acetylcholinesterase	EAD|FLJ55041	2226	2226	C9JBB2:F8WA67:Q9Y215:S4R408	NP_005668.2:NP_536799.1:NP_536800.2	Mouse:Colq|	Basement Membrane
Core matrisome	ECM Glycoproteins	COMP	cartilage oligomeric matrix protein	EDM1|EPD1|MED|MGC131819|MGC149768|PSACH|THBS5	2227	2227	B4DKJ3:G3XAP6:P49747	NP_000086.2	Mouse:Comp|
Core matrisome	ECM Glycoproteins	CRELD1	cysteine-rich with EGF-like domains 1	AVSD2|CIRRIN|DKFZp566D213	14630	14630	F8WBY3:H7C2L3:Q96HD1	NP_001026887.1:NP_001070883.1:NP_056328.2:XP_006713391.1	Mouse:Creld1|
Core matrisome	ECM Glycoproteins	CRELD2	cysteine-rich with EGF-like domains 2	DKFZp667O055|MGC11256	28150	28150	A6PWM2:Q6UXH1	NP_001128573.1:NP_001271246.1:NP_001271247.1:NP_077300.3:XP_005261795.1	Mouse:Creld2|
Core matrisome	ECM Glycoproteins	CRIM1	cysteine rich transmembrane BMP regulator 1 (chordin-like)	MGC138194|S52	2359	2359	H7C1Z0:H7C2T6:H7C458:Q9NZV1	NP_057525.1	Mouse:Crim1|
Core matrisome	ECM Glycoproteins	CRISPLD1	cysteine-rich secretory protein LCCL domain containing 1	CRISP10|DKFZp762F133|LCRISP1	18206	18206	B7Z8V9:E5RJS4:Q9H336	NP_001273707.1:NP_113649.1	Mouse:Crispld1|
Core matrisome	ECM Glycoproteins	CRISPLD2	cysteine-rich secretory protein LCCL domain containing 2	CRISP11|DKFZp434B044|LCRISP2|MGC74865	25248	25248	H3BS62:H3BSZ9:H3BTI0:H3BTP0:J3QKP2:Q9H0B8	NP_113664.1:XP_005256247.1	Mouse:Crispld2|
Core matrisome	ECM Glycoproteins	CTGF	connective tissue growth factor	CCN2|HCS24|IGFBP8|MGC102839|NOV2	2500	2500	P29279	NP_001892.1	Mouse:Ctgf|	CCN Family
Core matrisome	ECM Glycoproteins	CTHRC1	collagen triple helix repeat containing 1	-	18831	18831	E5RK99:E7EVQ5:Q96CG8	NP_001243028.1:NP_612464.1	Mouse:Cthrc1|
Core matrisome	ECM Glycoproteins	CYR61	cysteine-rich, angiogenic inducer, 61	CCN1|GIG1|IGFBP10	2654	2654	O00622	NP_001545.2	Mouse:Cyr61|	CCN Family
Core matrisome	ECM Glycoproteins	DDX26B	DEAD/H (Asp-Glu-Ala-Asp/His) box polypeptide 26B	DKFZp686G0470|FLJ41215|MGC88298	27334	27334	Q5JSJ4	NP_872346.3	Mouse:Ddx26b|
Core matrisome	ECM Glycoproteins	DMBT1	deleted in malignant brain tumors 1	FLJ61058|GP340|MGC164738|muclin	2926	2926	Q9UGM3	NP_004397.2:NP_015568.2:NP_060049.2	Mouse:Dmbt1|
Core matrisome	ECM Glycoproteins	DMP1	dentin matrix acidic phosphoprotein 1	ARHP|ARHR|DMP-1	2932	2932	Q13316	NP_001073380.1:NP_004398.1	Mouse:Dmp1|
Core matrisome	ECM Glycoproteins	DPT	dermatopontin	TRAMP	3011	3011	Q07507	NP_001928.2	Mouse:Dpt|
Core matrisome	ECM Glycoproteins	DSPP	dentin sialophosphoprotein	DFNA39|DGI1|DMP3|DPP|DSP|DTDP2	3054	3054	Q9NZW4	NP_055023.2	Mouse:Dspp|
Core matrisome	ECM Glycoproteins	ECM1	extracellular matrix protein 1	-	3153	3153	Q16610	NP_001189787.1:NP_004416.2:NP_073155.2	Mouse:Ecm1|
Core matrisome	ECM Glycoproteins	ECM2	extracellular matrix protein 2, female organ and adipocyte specific	MGC126355|MGC126356	3154	3154	O94769:Q5T9F3:Q5T9F4	NP_001184224.1:NP_001184225.1:NP_001384.1	Mouse:Ecm2|
Core matrisome	ECM Glycoproteins	EDIL3	EGF-like repeats and discoidin I-like domains 3	DEL1|MGC26287	3173	3173	O43854	NP_001265571.1:NP_005702.3	Mouse:Edil3|
Core matrisome	ECM Glycoproteins	EFEMP1	EGF-containing fibulin-like extracellular matrix protein 1	DHRD|DRAD|FBLN3|FBNL|FLJ35535|MGC111353|MLVT|MTLV|	3218	3218	C9J4H7:C9J4J8:C9J8S9:C9JPZ9:C9JQX7:C9JUM4:Q12805:Q580Q6	NP_001034437.1:NP_001034438.1	Mouse:Efemp1|	Fibulin
Core matrisome	ECM Glycoproteins	EFEMP2	EGF-containing fibulin-like extracellular matrix protein 2	FBLN4|MBP1|UPH1	3219	3219	E9PI47:E9PKA3:E9PNB8:E9PRQ8:E9PRU1:E9PSC1:H0YCB5:H0YCR9:H0YET5:H0YEU0:O95967	NP_058634.4	Mouse:Efemp2|	Fibulin
Core matrisome	ECM Glycoproteins	EGFLAM	EGF-like, fibronectin type III and laminin G domains	AGRINL|AGRNL|FLJ39155	26810	26810	D6RG24:D6RJD2:Q63HQ2	NP_001192230.1:NP_689616.2:NP_877950.1:NP_877953.1	Mouse:Egflam|
Core matrisome	ECM Glycoproteins	ELN	elastin	FLJ38671|FLJ43523|SVAS|WBS|WS	3327	3327	E7EN51:E7EN65:E7ENM0:E7ENW7:E7EP82:E7EQH8:E7ETP7:E7EWS8:E9PGX4:F8WAH6:G3V0G6:G5E950:H7C3K0:P15502	NP_000492.2:NP_001075221.1:NP_001075222.1:NP_001075223.1:NP_001075224.1:NP_001265844.1:NP_001265845.1:NP_001265841.1:NP_001265842.1:NP_001265843.1:NP_001265846.1	Mouse:Eln|
Core matrisome	ECM Glycoproteins	ELSPBP1	epididymal sperm binding protein 1	E12|EDDM12|HE12	14417	14417	M0QZH6:M0R006:M0R179:M0R331:Q96BH3	NP_071425.3
Core matrisome	ECM Glycoproteins	EMID1	EMI domain containing 1	EMI5|EMU1|MGC50657|hEmu1	18036	18036	B0QYK2:B0QYK3:B0QYK4:B0QYK5:F8WDX7:H0Y6W4:Q96A84	NP_001254824.1:NP_597712.2:XP_005261385.1	Mouse:Emid1|
Core matrisome	ECM Glycoproteins	EMILIN1	elastin microfibril interfacer 1	DKFZp586M121|EMI|EMILIN|gp115	19880	19880	H0Y7A0:Q9Y6C2	NP_008977.1	Mouse:Emilin1|
Core matrisome	ECM Glycoproteins	EMILIN2	elastin microfibril interfacer 2	EMILIN-2|FLJ33200|FOAP-10	19881	19881	Q9BXX0	NP_114437.2	Mouse:Emilin2|
Core matrisome	ECM Glycoproteins	EMILIN3	elastin microfibril interfacer 3	C20orf130|DKFZp434A2410|EMILIN5|dJ620E11.4	16123	16123	Q9NT22	NP_443078.1	Mouse:Emilin3|
Core matrisome	ECM Glycoproteins	EYS	eyes shut homolog (Drosophila)	C6orf178|C6orf179|C6orf180|EGFL10|EGFL11|KIAA0663|	21555	21555	F8WDD3:H0Y3Q4:Q5T1H1	NP_001136272.1:NP_001136273.1:NP_938024.1
Core matrisome	ECM Glycoproteins	FBLN1	fibulin 1	FBLN|FIBL1	3600	3600	B1AHL2:B1AHM4:B1AHM5:B1AHM6:B1AHM7:B1AHM8:B1AHM9:B1AHN3:F8W7M9:H7C1M6:P23142	NP_001987.2:NP_006476.2:NP_006477.2:NP_006478.2	Mouse:Fbln1|	Fibulin
Core matrisome	ECM Glycoproteins	FBLN2	fibulin 2	-	3601	3601	C9JQS6:F5H1F3:H7BXL0:H7C1A3:P98095	NP_001004019.1:NP_001158507.1:NP_001989.2	Mouse:Fbln2|	Fibulin
Core matrisome	ECM Glycoproteins	FBLN5	fibulin 5	ARMD3|DANCE|EVEC|FIBL-5|FLJ90059|UP50	3602	3602	G3V2P8:G3V329:G3V3Y2:G3V4U0:G3XA98:H0YJ31:Q9UBX5	NP_006320.2	Mouse:Fbln5|	Fibulin
Core matrisome	ECM Glycoproteins	FBLN7	fibulin 7	DKFZp547D0610|FLJ37440|TM14	26740	26740	B8ZZC1:H7BZ65:Q53RD9:Q8IY13	NP_001121637.1:NP_694946.2	Mouse:Fbln7|	Fibulin
Core matrisome	ECM Glycoproteins	FBN1	fibrillin 1	FBN|MASS|MFS1|OCTD|SGS|WMS	3603	3603	F6U495:H0YN80:H0YND0:P35555	NP_000129.3	Mouse:Fbn1|
Core matrisome	ECM Glycoproteins	FBN2	fibrillin 2	CCA|DA9	3604	3604	D6REJ2:D6RJI3:E9PHW4:P35556	NP_001990.2	Mouse:Fbn2|
Core matrisome	ECM Glycoproteins	FBN3	fibrillin 3	KIAA1776	18794	18794	M0QXL8:M0R2Q5:Q75N90	NP_115823.3
Core matrisome	ECM Glycoproteins	FGA	fibrinogen alpha chain	Fib2|MGC119422|MGC119423|MGC119425	3661	3661	P02671	NP_000499.1:NP_068657.1	Mouse:Fga|	Hemostasis
Core matrisome	ECM Glycoproteins	FGB	fibrinogen beta chain	MGC104327|MGC120405	3662	3662	D6REL8:F8W6P4:P02675	NP_001171670.1:NP_005132.2	Mouse:Fgb|	Hemostasis
Core matrisome	ECM Glycoproteins	FGG	fibrinogen gamma chain	-	3694	3694	C9JC84:C9JEU5:C9JPQ9:C9JU00:P02679	NP_000500.2:NP_068656.2	Mouse:Fgg|	Hemostasis
Core matrisome	ECM Glycoproteins	FGL1	fibrinogen-like 1	HFREP1|HP-041|LFIRE1|MGC12455	3695	3695	Q08830	NP_004458.3:NP_671736.2:NP_963846.1:NP_963847.1	Mouse:Fgl1|
Core matrisome	ECM Glycoproteins	FGL2	fibrinogen-like 2	T49|pT49	3696	3696	Q14314	NP_006673.1	Mouse:Fgl2|
Core matrisome	ECM Glycoproteins	FN1	fibronectin 1	CIG|DKFZp686F10164|DKFZp686H0342|DKFZp686I1370|DKF	3778	3778	F8W7G7:H0Y4K8:H0Y7Z1:P02751	NP_002017.1:NP_473375.2:NP_997639.1:NP_997641.1:NP_997643.1:NP_997647.1:XP_005246457.1:XP_005246463.1:XP_005246470.1:XP_005246472.1:XP_005246474.1	Mouse:Fn1|
Core matrisome	ECM Glycoproteins	FNDC1	fibronectin type III domain containing 1	AGS8|FNDC2|KIAA1866|MEL4B3|bA243O10.1|dJ322A24.1	21184	21184	J3KNQ2:Q4ZHG4	NP_115921.2	Mouse:Fndc1|
Core matrisome	ECM Glycoproteins	FNDC7	fibronectin type III domain containing 7	FLJ35838|MGC163293|RP11-293A10.2	26668	26668	H7C2H6:J3KN65:Q5VTL7	NP_001138409.1	Mouse:Fndc7|
Core matrisome	ECM Glycoproteins	FNDC8	fibronectin type III domain containing 8	DKFZp434H2215	25286	25286	Q8TC99	NP_060029.1	Mouse:Fndc8|
Core matrisome	ECM Glycoproteins	FRAS1	Fraser syndrome 1	DKFZp686I05113|DKFZp686P08111|FLJ14927|FLJ22031|KI	19185	19185	D6RCP6:H0Y8V2:H0Y930:H0Y9A6:H0Y9C9:Q86XX4	NP_001159605.1:NP_079350.5	Mouse:Fras1|
Core matrisome	ECM Glycoproteins	GAS6	growth arrest-specific 6	AXLLG|AXSF|DKFZp666G247|FLJ34709	4168	4168	J3KP07:Q14393	NP_000811.1:NP_001137417.1:NP_001137418.1	Mouse:Gas6|
Core matrisome	ECM Glycoproteins	GLDN	gliomedin	CLOM|COLM|CRG-L2|CRGL2|FLJ23917|UNC-112	29514	29514	H0YM22:Q6ZMI3	NP_861454.2:XP_006720545.1:XP_006720546.1	Mouse:Gldn|
Core matrisome	ECM Glycoproteins	HMCN1	hemicentin 1	ARMD1|FBLN6|FIBL-6|FIBL6	19194	19194	Q5TCP6:Q96RW7	NP_114141.2	Mouse:Hmcn1|	Fibulin
Core matrisome	ECM Glycoproteins	HMCN2	hemicentin 2	DKFZp434P0216|FLJ23816|FLJ46139|FLJ46844	21293	21293	A2A3K3:H0Y3X1:H7BZI5:H7C0N8:H7C3T8:Q8NDA2	NP_001278744.1	Mouse:Hmcn2|
Core matrisome	ECM Glycoproteins	IBSP	integrin-binding sialoprotein	BNSP|BSP|BSP-II|SP-II	5341	5341	P21815	NP_004958.2	Mouse:Ibsp|
Core matrisome	ECM Glycoproteins	IGFALS	insulin-like growth factor binding protein, acid labile subunit	ALS	5468	5468	H3BSX8:P35858	NP_001139478.1:NP_004961.1	Mouse:Igfals|	Growth Factor-binding
Core matrisome	ECM Glycoproteins	IGFBP1	insulin-like growth factor binding protein 1	AFBP|IBP1|IGF-BP25|PP12|hIGFBP-1	5469	5469	C9J6H2:C9JXF9:P08833	NP_000587.1	Mouse:Igfbp1|	Growth Factor-binding
Core matrisome	ECM Glycoproteins	IGFBP2	insulin-like growth factor binding protein 2, 36kDa	IBP2|IGF-BP53	5471	5471	C9JMY1:C9JW52:H7C1H0:P18065	NP_000588.2	Mouse:Igfbp2|	Growth Factor-binding
Core matrisome	ECM Glycoproteins	IGFBP3	insulin-like growth factor binding protein 3	BP-53|IBP3	5472	5472	B3KWK7:C9JMX4:H0Y485:H0Y5K2:P17936	NP_000589.2:NP_001013416.1	Mouse:Igfbp3|	Growth Factor-binding
Core matrisome	ECM Glycoproteins	IGFBP4	insulin-like growth factor binding protein 4	BP-4|HT29-IGFBP|IBP4|IGFBP-4	5473	5473	B4E351:P22692	NP_001543.2	Mouse:Igfbp4|	Growth Factor-binding
Core matrisome	ECM Glycoproteins	IGFBP5	insulin-like growth factor binding protein 5	IBP5	5474	5474	C9JXX4:P24593	NP_000590.1	Mouse:Igfbp5|	Growth Factor-binding
Core matrisome	ECM Glycoproteins	IGFBP6	insulin-like growth factor binding protein 6	IBP6	5475	5475	F8VVA5:F8VYK9:P24592	NP_002169.1	Mouse:Igfbp6|	Growth Factor-binding
Core matrisome	ECM Glycoproteins	IGFBP7	insulin-like growth factor binding protein 7	FSTL2|IGFBP-7|IGFBP-7v|IGFBPRP1|MAC25|PSF	5476	5476	Q16270	NP_001240764.1:NP_001544.1	Mouse:Igfbp7|	Growth Factor-binding
Core matrisome	ECM Glycoproteins	IGFBPL1	insulin-like growth factor binding protein-like 1	IGFBP-RP4|bA113O24.1	20081	20081	Q8WX77	NP_001007564.1	Mouse:Igfbpl1|	Growth Factor-binding
Core matrisome	ECM Glycoproteins	IGSF10	immunoglobulin superfamily, member 10	CMF608|FLJ25972	26384	26384	H7C4M2:Q6WRI0	NP_001171616.1:NP_001171617.1:NP_849144.2:XP_005247434.1:XP_006713660.1:XP_006713663.1	Mouse:Igsf10|
Core matrisome	ECM Glycoproteins	KAL1	Kallmann syndrome 1 sequence	ADMLX|HHA|KAL|KALIG-1|KMS	6211	6211	P23352	NP_000207.2	Mouse:Slamf6|
Core matrisome	ECM Glycoproteins	KCP	kielin/chordin-like protein	CRIM2|KCP1|NET67	17585	17585	Q6ZWJ8	NP_001129386.1:NP_955381.2	Mouse:Kcp|	Growth Factor-binding
Core matrisome	ECM Glycoproteins	LAMA1	laminin, alpha 1	LAMA	6481	6481	P25391	NP_005550.2	Mouse:Lama1|	Laminin, Basement Membrane
Core matrisome	ECM Glycoproteins	LAMA2	laminin, alpha 2	LAMM	6482	6482	P24043	NP_000417.2:NP_001073291.1	Mouse:Lama2|	Laminin, Basement Membrane
Core matrisome	ECM Glycoproteins	LAMA3	laminin, alpha 3	BM600|E170|LAMNA|LOCS|lama3a	6483	6483	K7EIP4:K7EMU9:K7EPP3:K7EQ42:K7ERM0:Q16787	NP_000218.2:NP_001121189.1:NP_001121190.1:NP_937762.1	Mouse:Lama3|	Laminin, Basement Membrane
Core matrisome	ECM Glycoproteins	LAMA4	laminin, alpha 4	DKFZp686D23145|LAMA3|LAMA4*-1	6484	6484	E5RFD7:E5RFQ2:E5RHF3:E5RK79:H0Y351:H0YAP9:H0YAQ5:Q16363:Q6LET9	NP_001098676.2:NP_001098677.2:NP_001098678.1:NP_001098679.1:NP_002281.3	Mouse:Lama4|	Laminin, Basement Membrane
Core matrisome	ECM Glycoproteins	LAMA5	laminin, alpha 5	KIAA1907	6485	6485	E2QRK0:F2Z2S4:H7C5J6:O15230:Q5JTP4	NP_005551.3	Mouse:Lama5|	Laminin, Basement Membrane
Core matrisome	ECM Glycoproteins	LAMB1	laminin, beta 1	CLM|MGC142015	6486	6486	C9J296:E7EPA6:E9PCS6:G3XAI2:P07942	NP_002282.2	Mouse:Lamb1|	Laminin, Basement Membrane
Core matrisome	ECM Glycoproteins	LAMB2	laminin, beta 2 (laminin S)	LAMS	6487	6487	F5H520:P55268	NP_002283.3:XP_005265184.1	Mouse:Lamb2|	Laminin, Basement Membrane
Core matrisome	ECM Glycoproteins	LAMB3	laminin, beta 3	BM600-125KDA|FLJ99565|LAM5|LAMNB1	6490	6490	Q13751:Q5THA1:X1WI29	NP_000219.2:NP_001017402.1:NP_001121113.1:XP_005273181.1	Mouse:Lamb3|	Laminin, Basement Membrane
Core matrisome	ECM Glycoproteins	LAMB4	laminin, beta 4	-	6491	6491	A4D0S4:C9JMJ0	NP_031382.2:XP_005250289.1		Laminin, Basement Membrane
Core matrisome	ECM Glycoproteins	LAMC1	laminin, gamma 1 (formerly LAMB2)	LAMB2|MGC87297	6492	6492	P11047:R4GNC7	NP_002284.3	Mouse:Lamc1|	Laminin, Basement Membrane
Core matrisome	ECM Glycoproteins	LAMC2	laminin, gamma 2	B2T|BM600|CSF|EBR2|EBR2A|LAMB2T|LAMNB2|MGC138491|M	6493	6493	Q13753	NP_005553.2:NP_061486.2	Mouse:Lamc2|	Laminin, Basement Membrane
Core matrisome	ECM Glycoproteins	LAMC3	laminin, gamma 3	DKFZp434E202	6494	6494	H7BY04:Q5JTC4:Q9Y6N6	NP_006050.3	Mouse:Lamc3|	Laminin, Basement Membrane
Core matrisome	ECM Glycoproteins	LGI1	leucine-rich, glioma inactivated 1	EPITEMPIN|EPT|ETL1|IB1099	6572	6572	O95970	NP_005088.1:XP_005270329.1	Mouse:Lgi1|
Core matrisome	ECM Glycoproteins	LGI2	leucine-rich repeat LGI family, member 2	FLJ10675|KIAA1916|LGIL2|MGC126808|MGC126810	18710	18710	H0YA65:Q8N0V4	NP_060646.2	Mouse:Lgi2|
Core matrisome	ECM Glycoproteins	LGI3	leucine-rich repeat LGI family, member 3	LGIL4	18711	18711	A5PLP2:E5RIV5:H0YAP4:Q8N145	NP_644807.1	Mouse:Lgi3|
Core matrisome	ECM Glycoproteins	LGI4	leucine-rich repeat LGI family, member 4	LGIL3	18712	18712	A8MVC2:K7ENQ0:Q8N135	NP_644813.1	Mouse:Lgi4|
Core matrisome	ECM Glycoproteins	LRG1	leucine-rich alpha-2-glycoprotein 1	HMFT1766|LRG	29480	29480	P02750	NP_443204.1	Mouse:Lrg1|
Core matrisome	ECM Glycoproteins	LTBP1	latent transforming growth factor beta binding protein 1	MGC163161	6714	6714	C9JD84:C9JDW2:E7EUU6:E7EV71:H7BZ76:H7C0I7:H7C2H7:H7C4L5:Q14766	NP_000618.3:NP_001159736.1:NP_001159737.1:NP_001159738.1:NP_996826.2	Mouse:Ltbp1|	Growth Factor-binding
Core matrisome	ECM Glycoproteins	LTBP2	latent transforming growth factor beta binding protein 2	C14orf141|GLC3D|LTBP3|MSTP031	6715	6715	G3V254:G3V3X5:G3V511:H0YJ20:Q14767	NP_000419.1	Mouse:Ltbp2|	Growth Factor-binding
Core matrisome	ECM Glycoproteins	LTBP3	latent transforming growth factor beta binding protein 3	DKFZp586M2123|FLJ33431|FLJ39893|FLJ42533|FLJ44138|	6716	6716	E9PJR2:E9PKW1:E9PPT7:E9PQR0:E9PR75:E9PR84:E9PRF2:F5GWC4:H0YC99:H0YCQ2:H0YCX6:H0YE75:Q9NS15	NP_001123616.1:NP_001157738.1:NP_066548.2	Mouse:Ltbp3|	Growth Factor-binding
Core matrisome	ECM Glycoproteins	LTBP4	latent transforming growth factor beta binding protein 4	FLJ46318|FLJ90018|LTBP-4|LTBP4L|LTBP4S	6717	6717	E7ENG9:E7EUU1:F5GXC9:F8WAA0:M0QXV3:M0QYE9:M0QZX0:M0R351:Q8N2S1	NP_001036009.1:NP_001036010.1:NP_003564.2	Mouse:Ltbp4|	Growth Factor-binding
Core matrisome	ECM Glycoproteins	MATN1	matrilin 1, cartilage matrix protein	CMP|CRTM	6907	6907	P21941	NP_002370.1	Mouse:Matn1|
Core matrisome	ECM Glycoproteins	MATN2	matrilin 2	-	6908	6908	E5RJM4:H0YBD5:H0YBF2:H0YBJ4:H0YBM3:H0YBN2:H0YBU5:H0YBV5:J3KN08:O00339	NP_002371.3:NP_085072.2	Mouse:Matn2|
Core matrisome	ECM Glycoproteins	MATN3	matrilin 3	DIPOA|EDM5|HOA|OADIP|OS2	6909	6909	O15232	NP_002372.1	Mouse:Matn3|
Core matrisome	ECM Glycoproteins	MATN4	matrilin 4	FLJ14417|HE6WCR54	6910	6910	A6NNA4:O95460	NP_085080.1:NP_085095.1:XP_005260654.1:NP_085095.1	Mouse:Matn4|
Core matrisome	ECM Glycoproteins	MEPE	matrix extracellular phosphoglycoprotein	OF45	13361	13361	D6RAC8:D6RFW6:Q9NQ76	NP_001171623.1:NP_001171624.1:NP_001171625.1:NP_001171626.1:NP_001278112.1:NP_064588.1:XP_006714341.1	Mouse:Mepe|
Core matrisome	ECM Glycoproteins	MFAP1	microfibrillar-associated protein 1	-	7032	7032	P55081	NP_005917.2	Mouse:Mfap1a|Mouse:Mfap1b|
Core matrisome	ECM Glycoproteins	MFAP2	microfibrillar-associated protein 2	FLJ50901|MAGP|MAGP-1|MAGP1	7033	7033	P55001	NP_001128719.1:NP_001128720.1:NP_002394.1:NP_059453.1	Mouse:Mfap2|
Core matrisome	ECM Glycoproteins	MFAP3	microfibrillar-associated protein 3	DKFZp586F0219	7034	7034	E5RH26:E5RHQ6:E5RJ59:P55082	NP_001128509.1:NP_001229265.1:NP_005918.1	Mouse:Mfap3|
Core matrisome	ECM Glycoproteins	MFAP4	microfibrillar-associated protein 4	-	7035	7035	K7ES70:P55083	NP_001185624.1:NP_002395.1	Mouse:Mfap4|
Core matrisome	ECM Glycoproteins	MFAP5	microfibrillar associated protein 5	MAGP2|MP25	29673	29673	B3KW70:F5GYX4:F5H1C0:F5H2W4:F5H413:F5H7Z2:H0YG03:H0YGS3:Q13361:Q7Z490	NP_003471.1:XP_005253542.1	Mouse:Mfap5|
Core matrisome	ECM Glycoproteins	MFGE8	milk fat globule-EGF factor 8 protein	BA46|EDIL1|HsT19888|MFG-E8|OAcGD3S|SED1|SPAG10|hP4	7036	7036	F5GZN3:F5H7N9:H0YKB5:H0YKS8:Q08431:X6R3G6	NP_001108086.1:NP_001108086.1:NP_005919.2	Mouse:Mfge8|
Core matrisome	ECM Glycoproteins	MGP	matrix Gla protein	GIG36|MGLAP|NTI	7060	7060	H0YGZ6:P08493	NP_000891.2:NP_001177768.1	Mouse:Mgp|
Core matrisome	ECM Glycoproteins	MMRN1	multimerin 1	ECM|EMILIN4|GPIa*|MMRN	7178	7178	E7EPG1:Q13201	NP_031377.2	Mouse:Mmrn1|
Core matrisome	ECM Glycoproteins	MMRN2	multimerin 2	EMILIN3|EndoGlyx-1|FLJ13465	19888	19888	Q9H8L6:R4GMY6:V9GY37:V9GY43:V9GYS9	NP_079032.2	Mouse:Mmrn2|
Core matrisome	ECM Glycoproteins	MXRA5	matrix-remodelling associated 5	DKFZp564I1922	7539	7539	Q9NR99	NP_056234.2
Core matrisome	ECM Glycoproteins	NDNF	chromosome 4 open reading frame 31	FLJ23191|C4orf31	26256	26256	D6R972:D6RF18:Q8TB73	NP_078850.3	Mouse:Ndnf|
Core matrisome	ECM Glycoproteins	NELL1	NEL-like 1 (chicken)	FLJ45906|IDH3GL|NRP1	7750	7750	F5H6I3:J3KNC5:Q92832	NP_001275642.1:NP_001275642.1:NP_001275643.1:NP_006148.2:NP_963845.1:NP_001275643.1	Mouse:Nell1|
Core matrisome	ECM Glycoproteins	NELL2	NEL-like 2 (chicken)	NRP2	7751	7751	F8VRQ0:F8VVB6:F8VXR5:F8VZ72:F8W1A2:F8W1I8:H0YHY5:H0YI34:H0YIT4:Q99435	NP_001138579.1:NP_001138580.1:NP_001138581.1:NP_001138582.1:NP_006150.1:XP_005268962.1	Mouse:Nell2|
Core matrisome	ECM Glycoproteins	NID1	nidogen 1	NID	7821	7821	P14543	NP_002499.2	Mouse:Nid1|	Basement Membrane
Core matrisome	ECM Glycoproteins	NID2	nidogen 2 (osteonidogen)	-	13389	13389	H0YJV3:Q14112	NP_031387.3	Mouse:Nid2|	Basement Membrane
Core matrisome	ECM Glycoproteins	NOV	nephroblastoma overexpressed gene	CCN3|IGFBP9	7885	7885	P48745	NP_002505.1	Mouse:Nov|	CCN Family
Core matrisome	ECM Glycoproteins	NPNT	nephronectin	EGFL6L|POEM	27405	27405	D6RE63:D6RH31:H0Y8M1:H0YA60:H0YAK9:Q6UXI9	NP_001028219.1:NP_001171619.1:NP_001171620.1:NP_001171621.1:NP_001171622.1	Mouse:Npnt|
Core matrisome	ECM Glycoproteins	NTN1	netrin 1	NTN1L	8029	8029	H7BZF4:O95631	NP_004813.2:XP_006721658.1	Mouse:Ntn1|
Core matrisome	ECM Glycoproteins	NTN3	netrin 3	NTN2L	8030	8030	O00634	NP_006172.1	Mouse:Ntn3|
Core matrisome	ECM Glycoproteins	NTN4	netrin 4	FLJ23180|PRO3091	13658	13658	F8W0I7:Q9HB63	NP_067052.2	Mouse:Ntn4|
Core matrisome	ECM Glycoproteins	NTN5	netrin 5	-	25208	25208	M0QXZ9:Q8WTR8	NP_665806.1:XP_006723074.1	Mouse:Ntn5|
Core matrisome	ECM Glycoproteins	NTNG1	netrin G1	KIAA0976|Lmnt1	23319	23319	A6NK56:B4DKF0:F5GYT0:F8WEB5:Q9Y2I2	NP_001106697.1:NP_001106699.1:NP_055732.2:XP_006710519.1	Mouse:Ntng1|
Core matrisome	ECM Glycoproteins	NTNG2	netrin G2	KIAA0625|KIAA1857|LHLL9381|Lmnt2|MGC21884|NTNG1|bA	14288	14288	A6NMX7:Q5JUJ3:Q96CW9	NP_115925.2	Mouse:Ntng2|
Core matrisome	ECM Glycoproteins	OIT3	oncoprotein induced transcript 3	FLJ39116|LZP	29953	29953	Q8WWZ8	NP_689848.1	Mouse:Oit3|
Core matrisome	ECM Glycoproteins	OTOG	otogelin	FLJ46346|OTGN|mlemp	8516	8516	C9IZ84:H9KVB3:Q6ZRI0	NP_001264198.1	Mouse:Otog|
Core matrisome	ECM Glycoproteins	OTOL1	otolin-1	-	34071	34071	A6NHN0	NP_001073909.1:XP_005247166.1	Mouse:Otol1|
Core matrisome	ECM Glycoproteins	PAPLN	papilin, proteoglycan-like sulfated glycoprotein	DKFZp434F053|MGC50452	19262	19262	B5MDP7:G3V5P6:H0YJA1:H0YMM2:O95428	NP_775733.3	Mouse:Papln|
Core matrisome	ECM Glycoproteins	PCOLCE	procollagen C-endopeptidase enhancer	PCPE|PCPE1	8738	8738	Q15113	NP_002584.2	Mouse:Pcolce|
Core matrisome	ECM Glycoproteins	PCOLCE2	procollagen C-endopeptidase enhancer 2	PCPE2	8739	8739	C9JYX9:H7C520:H7C5D5:Q9UKZ9	NP_037495.1	Mouse:Pcolce2|
Core matrisome	ECM Glycoproteins	POMZP3	POM (POM121 homolog, rat) and ZP3 fusion	MGC8359|POM-ZP3|POM121	9203	9203	C9J370:C9JER0:H7C4D5:Q6PJE2	NP_036362.3:NP_694537.1
Core matrisome	ECM Glycoproteins	POSTN	periostin, osteoblast specific factor	MGC119510|MGC119511|OSF-2|OSF2|PDLPOSTN|PN|RP11-41	16953	16953	B1ALD9:Q15063	NP_001129406.1:NP_001129407.1:NP_001129408.1:NP_001273594.1:NP_001273595.1:NP_001273596.1:NP_006466.2:XP_005266288.1	Mouse:Postn|
Core matrisome	ECM Glycoproteins	PXDN	peroxidasin homolog (Drosophila)	D2S448|D2S448E|KIAA0230|MG50|PRG2|PXN|VPO	14966	14966	C9J4I9:H7C1W1:H7C300:H7C3W2:Q92626	NP_036425.1	Mouse:Pxdn|
Core matrisome	ECM Glycoproteins	PXDNL	peroxidasin homolog (Drosophila)-like	FLJ25471|VPO2	26359	26359	A1KZ92:H0YAV0:K4DIA6	NP_653252.3
Core matrisome	ECM Glycoproteins	RELN	reelin	PRO1598|RL	9957	9957	H7C2B0:J3KQ66:P78509	NP_005036.2:NP_774959.1	Mouse:Reln|
Core matrisome	ECM Glycoproteins	RSPO1	R-spondin homolog (Xenopus laevis)	CRISTIN3|FLJ40906|RSPO	21679	21679	Q2MKA7	NP_001033722.1:NP_001229837.1:NP_001229838.1:NP_001229839.1:XP_006710646.1	Mouse:Rspo1|
Core matrisome	ECM Glycoproteins	RSPO2	R-spondin 2 homolog (Xenopus laevis)	CRISTIN2|MGC35555|MGC43342	28583	28583	E5RGU9:E5RH25:E5RHC3:E5RJA2:E5RJU7:Q6UXX9	NP_001269792.1:NP_848660.3:XP_005250963.1	Mouse:Rspo2|
Core matrisome	ECM Glycoproteins	RSPO3	R-spondin 3 homolog (Xenopus laevis)	CRISTIN1|FLJ14440|PWTSR|THSD2	20866	20866	Q9BXY4	NP_116173.2	Mouse:Rspo3|
Core matrisome	ECM Glycoproteins	RSPO4	R-spondin family, member 4	C20orf182|CRISTIN4|FLJ16018	16175	16175	Q2I0M5	NP_001025042.2:NP_001035096.1	Mouse:Rspo4|
Core matrisome	ECM Glycoproteins	SBSPON	chromosome 8 open reading frame 84	FLJ40021|RPESP|C8orf84	30362	30362	Q8IVN8	NP_694957.3
Core matrisome	ECM Glycoproteins	SLIT1	slit homolog 1 (Drosophila)	MEGF4|MGC164811|SLIL1|SLIT3|Slit-1	11085	11085	O75093:Q5T0V0:Q5T0V2:Q5T0V3:Q5T0V4	NP_003052.2	Mouse:Slit1|
Core matrisome	ECM Glycoproteins	SLIT2	slit homolog 2 (Drosophila)	FLJ14420|SLIL3|Slit-2	11086	11086	E9PCX4:F5H0U4:H0Y968:H0Y9Z6:O94813:X6R3P0	NP_001276064.1:NP_001276065.1:NP_004778.1	Mouse:Slit2|
Core matrisome	ECM Glycoproteins	SLIT3	slit homolog 3 (Drosophila)	FLJ10764|MEGF5|SLIL2|SLIT1|Slit-3|slit2	11087	11087	O75094	NP_001258875.1:NP_003053.1	Mouse:Slit3|
Core matrisome	ECM Glycoproteins	SMOC1	SPARC related modular calcium binding 1	-	20318	20318	Q9H4F8	NP_001030024.1:NP_071420.1	Mouse:Smoc1|
Core matrisome	ECM Glycoproteins	SMOC2	SPARC related modular calcium binding 2	MST117|MSTP117|MSTP140|SMAP2|bA270C4A.1|bA37D8.1|d	20323	20323	H0Y3J4:H0Y5I1:Q9H3U7	NP_001159884.1:NP_071421.1	Mouse:Smoc2|
Core matrisome	ECM Glycoproteins	SNED1	sushi, nidogen and EGF-like domains 1	DKFZp586B2420|FLJ00133|SST3|Snep	24696	24696	B5MEF5:H7BYY9:H7C0D4:H7C1R9:Q8TER0	NP_001073906.1:XP_006712468.1:XP_006712469.1	Mouse:Sned1|
Core matrisome	ECM Glycoproteins	SPARC	secreted protein, acidic, cysteine-rich (osteonectin)	ON	11219	11219	E5RJA5:E5RK62:F5GY03:F5H4E2:P09486	NP_003109.1	Mouse:Sparc|
Core matrisome	ECM Glycoproteins	SPARCL1	SPARC-like 1 (hevin)	PIG33|SC1	11220	11220	B4E2Z0:C9JJR8:D6RA29:E7EU82:E9PC64:F5H1Y9:F5H331:F5H4Y3:Q14515	NP_001121782.1:NP_004675.3	Mouse:Sparcl1|
Core matrisome	ECM Glycoproteins	SPON1	spondin 1, extracellular matrix protein	KIAA0762|MGC10724|f-spondin	11252	11252	Q9HCB6	NP_006099.2	Mouse:Spon1|
Core matrisome	ECM Glycoproteins	SPON2	spondin 2, extracellular matrix protein	DIL-1|DIL1|DKFZp686G21139|FLJ16313|FLJ22401|FLJ344	11253	11253	D6RA41:D6RB12:D6RBY3:D6REX2:D6RFY9:D6RIH5:Q9BUD6	NP_001121797.1:NP_001185950.1:NP_036577.1	Mouse:Spon2|
Core matrisome	ECM Glycoproteins	SPP1	secreted phosphoprotein 1	BNSP|BSPI|ETA-1|MGC110940|OPN	11255	11255	D6R9C5:P10451	NP_000573.1:NP_001035147.1:NP_001035149.1:NP_001238758.1:NP_001238759.1	Mouse:Spp1|
Core matrisome	ECM Glycoproteins	SRPX	sushi-repeat-containing protein, X-linked	DRS|ETX1|SRPX1	11309	11309	P78539	NP_001164221.1:NP_001164222.1:NP_001164223.1:NP_006298.1	Mouse:Srpx|
Core matrisome	ECM Glycoproteins	SRPX2	sushi-repeat-containing protein, X-linked 2	BPP|CBPS|PMGX|RESDX|SRPUL	30668	30668	O60687	NP_055282.1:XP_005262178.1	Mouse:Srpx2|
Core matrisome	ECM Glycoproteins	SSPO	SCO-spondin homolog (Bos taurus)	FLJ36112|FLJ45737|KIAA2036|SCO-spondin	21998	21998	A2VEC9	NP_940857.2	Mouse:Sspo|
Core matrisome	ECM Glycoproteins	SVEP1	sushi, von Willebrand factor type A, EGF and pentraxin domain containing 1	C9orf13|CCP22|FLJ16013|FLJ90719|POLYDOM|SEL-OB|SEL	15985	15985	E9PBN8:Q4LDE5	NP_699197.3	Mouse:Svep1|
Core matrisome	ECM Glycoproteins	TECTA	tectorin alpha	DFNA12|DFNA8|DFNB21	11720	11720	O75443	NP_005413.2	Mouse:Tecta|
Core matrisome	ECM Glycoproteins	TECTB	tectorin beta	KIAA1560|MGC142057|MGC142059	11721	11721	Q96PL2	NP_478129.1:XP_005270164.1	Mouse:Tectb|
Core matrisome	ECM Glycoproteins	TGFBI	transforming growth factor, beta-induced, 68kDa	BIGH3|CDB1|CDG2|CDGG1|CSD|CSD1|CSD2|CSD3|EBMD|LCD1	11771	11771	D6RBX4:G8JLA8:H0Y8L3:H0Y8M8:H0Y9D7:H0YAB8:H0YAH8:Q15582:S4R3C6	NP_000349.1	Mouse:Tgfbi|
Core matrisome	ECM Glycoproteins	THBS1	thrombospondin 1	THBS|THBS-1|TSP|TSP-1|TSP1	11785	11785	A8MZG1:P07996	NP_003237.2	Mouse:Thbs1|
Core matrisome	ECM Glycoproteins	THBS2	thrombospondin 2	TSP2	11786	11786	P35442:Q5RI53	NP_003238.2	Mouse:Thbs2|
Core matrisome	ECM Glycoproteins	THBS3	thrombospondin 3	MGC119564|MGC119565|TSP3	11787	11787	B4DQH6:F5H4Z8:P49746:Q2HIZ1	NP_001239536.1:NP_001239537.1:NP_009043.1	Mouse:Thbs3|
Core matrisome	ECM Glycoproteins	THBS4	thrombospondin 4	TSP4	11788	11788	E7ES19:P35443	NP_003239.2	Mouse:Thbs4|
Core matrisome	ECM Glycoproteins	THSD4	thrombospondin, type I, domain containing 4	ADAMTSL6|FLJ13710|FVSY9334|PRO34005	25835	25835	Q6ZMP0	NP_001273358.1:NP_079093.2:XP_006720755.1	Mouse:Thsd4|
Core matrisome	ECM Glycoproteins	TINAG	tubulointerstitial nephritis antigen	TIN-AG	14599	14599	B1AQ11:Q5T466:Q5T471:Q9UJW2	NP_055279.3	Mouse:Tinag|
Core matrisome	ECM Glycoproteins	TINAGL1	tubulointerstitial nephritis antigen-like 1	ARG1|LCN7|LIECG3|TINAGRP	19168	19168	B4DNS5:E7EUP2:Q9GZM7	NP_001191343.1:NP_001191344.1:NP_071447.1	Mouse:Tinagl1|
Core matrisome	ECM Glycoproteins	TNC	tenascin C	150-225|GMEM|GP|HXB|JI|MGC167029|TN	5318	5318	E9PC84:F5H5D6:F5H7V9:H0YGZ3:J3QSU6:P24821	NP_002151.2:XP_005252029.1:XP_005252031.1:XP_005252032.1:XP_006717161.1:XP_006717163.1	Mouse:Tnc|
Core matrisome	ECM Glycoproteins	TNFAIP6	tumor necrosis factor, alpha-induced protein 6	TSG-6|TSG6	11898	11898	P98066	NP_009046.2	Mouse:Tnfaip6|
Core matrisome	ECM Glycoproteins	TNN	tenascin N	TN-W	22942	22942	Q9UQP3	NP_071376.1	Mouse:Tnn|
Core matrisome	ECM Glycoproteins	TNR	tenascin R (restrictin, janusin)	MGC149328|TN-R	11953	11953	H0Y668:Q92752	NP_003276.3	Mouse:Tnr|
Core matrisome	ECM Glycoproteins	TNXB	tenascin XB	HXBL|TENX|TNX|TNXB1|TNXB2|TNXBS|XB|XBS	11976	11976	C9J7W4:E7EPZ9:P22105	NP_061978.6:NP_115859.2	Mouse:Tnxb|
Core matrisome	ECM Glycoproteins	TSKU	tsukushi small leucine rich proteoglycan homolog (Xenopus laevis)	E2IG4|LRRC54|TSK	28850	28850	E9PLG7:E9PN12:Q8WUA8	NP_001245139.1:NP_056331.2	Mouse:Tsku|
Core matrisome	ECM Glycoproteins	TSPEAR	chromosome 21 open reading frame 29	MGC11251|TSPEAR|C21orf29	1268	1268	A8MW19:Q8WU66	NP_001258966.1:NP_659428.2:XP_005261214.1	Mouse:Tspear|
Core matrisome	ECM Glycoproteins	VIT	vitrin	DKFZp313L1517|MGC149746|MGC70561	12697	12697	B5MD45:C9J6F5:H7C587:Q6UXI7	NP_001171440.1:NP_001171441.1:NP_001171442.1:NP_001171443.1:NP_444506.2	Mouse:Vit|
Core matrisome	ECM Glycoproteins	VTN	vitronectin	V75|VN|VNT	12724	12724	P04004	NP_000629.3	Mouse:Vtn|	Hemostasis
Core matrisome	ECM Glycoproteins	VWA1	von Willebrand factor A domain containing 1	DKFZp761O051|FLJ22215|WARP	30910	30910	J3QLP3:J3QRR0:Q6PCB0	NP_073745.2:NP_954572.2	Mouse:Vwa1|
Core matrisome	ECM Glycoproteins	VWA2	von Willebrand factor A domain containing 2	AMACO|CCSP-2|MGC157755|NET42	24709	24709	Q5GFL6	NP_001258975.1	Mouse:Vwa2|
Core matrisome	ECM Glycoproteins	VWA3A	von Willebrand factor A domain containing 3A	FLJ40941|FLJ46765	27088	27088	A6NCI4:H3BTG8:H3BTX3:H3BUS3:H7BXL8	NP_775886.3	Mouse:Vwa3a|
Core matrisome	ECM Glycoproteins	VWA3B	von Willebrand factor A domain containing 3B	FLJ32686|MGC26733	28385	28385	B7Z7Q7:F8W737:F8WBX4:F8WD48:F8WD56:H0YCW7:H0YDS6:H0YEM4:H0YF54:Q502W6	NP_659429.4:XP_005263954.1	Mouse:Vwa3b|
Core matrisome	ECM Glycoproteins	VWA5A	von Willebrand factor A domain containing 5A	BCSC-1|BCSC1|LOH11CR2A	6658	6658	B4DHS6:O00534	NP_001123614.1:NP_055437.2:NP_938057.1	Mouse:AW551984|Mouse:Vwa5a|
Core matrisome	ECM Glycoproteins	VWA5B1	von Willebrand factor A domain containing 5B1	FLJ32784|FLJ43845	26538	26538	E7EM39:E7EM40:E9PMB3:E9PNX8:E9PP07:E9PQ62:H0YED8:Q5TIE3	NP_001034589.2	Mouse:Vwa5b1|
Core matrisome	ECM Glycoproteins	VWA5B2	von Willebrand factor A domain containing 5B2	-	25144	25144	E9PF42:Q8N398	NP_612354.1:XP_006713882.1:XP_006713881.1	Mouse:Vwa5b2|
Core matrisome	ECM Glycoproteins	VWA7	chromosome 6 open reading frame 27	FLJ25524|G7c|NG37|C6orf27	13939	13939	E7EMA3:Q9Y334	NP_079534.2	Mouse:Vwa7|
Core matrisome	ECM Glycoproteins	VWA9	chromosome 15 open reading frame 44	DKFZp564O1664|C15orf44	25372	25372	B4DJL6:B4DVT3:H3BMK7:H3BN95:H3BNR6:H3BP17:H3BRY6:H3BT02:H3BV25:Q96SY0	NP_001193987.1:NP_001193988.1:XP_006720772.1:XP_006720773.1:XP_006720774.1	Mouse:Vwa9|
Core matrisome	ECM Glycoproteins	VWCE	von Willebrand factor C and EGF domains	FLJ32009|URG11|VWC1	26487	26487	B4DS56:B4DY31:Q96DN2	NP_689931.2	Mouse:Vwce|
Core matrisome	ECM Glycoproteins	VWDE	von Willebrand factor D and EGF domains	FLJ14712	21897	21897	E5RG96:J3KQJ9:Q8N2E2	NP_001129396.1	Mouse:Vwde|
Core matrisome	ECM Glycoproteins	VWF	von Willebrand factor	F8VWF|VWD	12726	12726	I3L4K4:P04275:Q8TCE8	NP_000543.2	Mouse:Vwf|	Hemostasis
Core matrisome	ECM Glycoproteins	WISP1	WNT1 inducible signaling pathway protein 1	CCN4|WISP1c|WISP1i|WISP1tc	12769	12769	E5RG88:O95388	NP_001191798.1:NP_001191799.1:NP_003873.1:NP_543028.1	Mouse:Wisp1|	CCN Family
Core matrisome	ECM Glycoproteins	WISP2	WNT1 inducible signaling pathway protein 2	CCN5|CT58|CTGF-L	12770	12770	O76076:Q6PEG3	NP_003872.1:XP_005260660.1	Mouse:Wisp2|	CCN Family
Core matrisome	ECM Glycoproteins	WISP3	WNT1 inducible signaling pathway protein 3	CCN6|LIBC|MGC125987|MGC125988|MGC125989|PPAC|PPD	12771	12771	F8WC24:G3V0J1:O95389:O95958:Q3T1A9	NP_003871.1:NP_937882.1:XP_005267252.1	Mouse:Wisp3|	CCN Family
Core matrisome	ECM Glycoproteins	ZP1	zona pellucida glycoprotein 1 (sperm receptor)	MGC87693	13187	13187	H0YG11:P60852	NP_997224.2	Mouse:Zp1|
Core matrisome	ECM Glycoproteins	ZP2	zona pellucida glycoprotein 2 (sperm receptor)	ZPA	13188	13188	Q05996	NP_001277033.1:NP_003451.1	Mouse:Zp2|
Core matrisome	ECM Glycoproteins	ZP3	zona pellucida glycoprotein 3 (sperm receptor)	ZP3A|ZP3B|ZPC	13189	13189	E9PFI9:H0Y3M4:P21754	NP_001103824.1:NP_009086.4	Mouse:Zp3|
Core matrisome	ECM Glycoproteins	ZP4	zona pellucida glycoprotein 4	ZBP|ZP1|ZPB	15770	15770	Q12836	NP_067009.1	Mouse:Zp4-ps|
Core matrisome	ECM Glycoproteins	ZPLD1	zona pellucida-like domain containing 1	-	27022	27022	Q8TCW7	NP_778226.1:XP_005247167.1	Mouse:Zpld1|
Core matrisome	Collagens	COL10A1	collagen, type X, alpha 1	-	2185	2185	Q03692:Q5QPC7:Q5QPC8	NP_000484.2:XP_006715395.1:XP_006715396.1	Mouse:Col10a1|
Core matrisome	Collagens	COL11A1	collagen, type XI, alpha 1	CO11A1|COLL6|STL2	2186	2186	C9JMN2:H7C381:P12107	NP_001177638.1:NP_001845.3:NP_542196.2:NP_542197.3	Mouse:Col11a1|
Core matrisome	Collagens	COL11A2	collagen, type XI, alpha 2	DFNA13|DFNB53|HKE5|PARP|STL3	2187	2187	A2AAS7:H0Y3B3:H0Y3B5:H0Y3M9:H0YHM5:H0YHM9:H0YIS1:P13942:Q4VXY6	NP_001157243.1:NP_542411.2:NP_542412.2:NP_542410.2:NP_542412.2	Mouse:Col11a2|
Core matrisome	Collagens	COL12A1	collagen, type XII, alpha 1	BA209D8.1|COL12A1L|DJ234P15.1	2188	2188	D6RGG3:H0Y4P7:H0Y5N9:H0Y991:Q99715	NP_004361.3:NP_542376.2	Mouse:Col12a1|	FACIT
Core matrisome	Collagens	COL13A1	collagen, type XIII, alpha 1	COLXIIIA1|FLJ42485	2190	2190	E7ES46:E7ES47:E7ES49:E7ES50:E7ES51:E7ES55:E7ES56:E7EX21:E9PEG9:G5E987:H7BYT9:H7BZB6:Q5TAT6	NP_001123575.1:NP_542988.3:NP_542990.3:NP_542991.3:NP_542992.3:NP_542995.3	Mouse:Col13a1|
Core matrisome	Collagens	COL14A1	collagen, type XIV, alpha 1	UND	2191	2191	H0YBB2:J3QT75:J3QT83:Q05707:Q4G0W3	NP_066933.1:XP_005251116.1:XP_006716714.1	Mouse:Col14a1|	FACIT
Core matrisome	Collagens	COL15A1	collagen, type XV, alpha 1	FLJ38566	2192	2192	P39059	NP_001846.3	Mouse:Col15a1|	Basement Membrane
Core matrisome	Collagens	COL16A1	collagen, type XVI, alpha 1	447AA|FP1572	2193	2193	A6NCT7:A6NDR9:H7BY97:H7BZL8:H7C3F0:Q07092	NP_001847.3	Mouse:Col16a1|	FACIT
Core matrisome	Collagens	COL17A1	collagen, type XVII, alpha 1	BA16H23.2|BP180|BPAG2|FLJ60881|KIAA0204|LAD-1	2194	2194	A2A2Y8:H0Y420:Q9UMD9	NP_000485.3	Mouse:Col17a1|
Core matrisome	Collagens	COL18A1	collagen, type XVIII, alpha 1	FLJ27325|FLJ34914|KNO|KNO1|MGC74745	2195	2195	H7BXV5:H7C457:P39060	NP_085059.2:NP_569712.2	Mouse:Col18a1|	Basement Membrane
Core matrisome	Collagens	COL19A1	collagen, type XIX, alpha 1	COL9A1L|D6S228E	2196	2196	Q14993:Q5JVU1	NP_001849.2	Mouse:Col19a1|	FACIT
Core matrisome	Collagens	COL1A1	collagen, type I, alpha 1	OI4	2197	2197	I3L3H7:P02452	NP_000079.2	Mouse:Col1a1|
Core matrisome	Collagens	COL1A2	collagen, type I, alpha 2	OI4	2198	2198	P08123	NP_000080.2	Mouse:Col1a2|
Core matrisome	Collagens	COL20A1	collagen, type XX, alpha 1	KIAA1510|bA261N11.4	14670	14670	B7ZBI4:B7ZBI5:Q9P218	NP_065933.2	Mouse:Col20a1|	FACIT
Core matrisome	Collagens	COL21A1	collagen, type XXI, alpha 1	COLA1L|DKFZp564B052|FLJ39125|FLJ44623|FP633|MGC266	17025	17025	A6PVD9:F5GZK2:H0Y4C9:H0YDH6:Q96P44	NP_110447.2		FACIT
Core matrisome	Collagens	COL22A1	collagen, type XXII, alpha 1	-	22989	22989	H0YAX7:Q8NFW1	NP_690848.1:XP_005250867.1:XP_006716576.1	Mouse:Col22a1|	FACIT
Core matrisome	Collagens	COL23A1	collagen, type XXIII, alpha 1	DKFZp434K0621	22990	22990	Q86Y22	NP_775736.2	Mouse:Col23a1|
Core matrisome	Collagens	COL24A1	collagen, type XXIV, alpha 1	MGC142214	20821	20821	E9PNK8:F8WDM8:H0YCZ7:Q17RW2	NP_690850.2	Mouse:Col24a1|
Core matrisome	Collagens	COL25A1	collagen, type XXV, alpha 1	CLAC|CLACP	18603	18603	A8MWQ5:D6R8Y2:E9PNV9:H0YAE1:Q9BXS0	NP_001243003.1:NP_115907.2:NP_942014.1	Mouse:Col25a1|
Core matrisome	Collagens	COL26A1	EMI domain containing 2	COL26A1|EMI6|EMU2|MGC129848|SH2B|hEmu2|EMID2	18038	18038	C9JPW4:Q96A83	NP_001265492.1:NP_597714.2	Mouse:Col26a1|
Core matrisome	Collagens	COL27A1	collagen, type XXVII, alpha 1	FLJ11895|KIAA1870|MGC11337	22986	22986	H0YD40:Q5T1U7:Q8IZC6	NP_116277.2	Mouse:Col27a1|
Core matrisome	Collagens	COL28A1	collagen, type XXVIII, alpha 1	COL28	22442	22442	H7BZU0:H7C3P2:Q2UY09	NP_001032852.2	Mouse:Col28a1|
Core matrisome	Collagens	COL2A1	collagen, type II, alpha 1	ANFH|AOM|COL11A3|MGC131516|SEDC	2200	2200	P02458	NP_001835.3:NP_149162.2	Mouse:Col2a1|
Core matrisome	Collagens	COL3A1	collagen, type III, alpha 1	EDS4A|FLJ34534	2201	2201	E7ENY8:H7C435:P02461	NP_000081.1	Mouse:Col3a1|
Core matrisome	Collagens	COL4A1	collagen, type IV, alpha 1	arresten	2202	2202	F5H5K0:P02462	NP_001836.2	Mouse:Col4a1|	Basement Membrane
Core matrisome	Collagens	COL4A2	collagen, type IV, alpha 2	DKFZp686I14213|FLJ22259	2203	2203	A2A352:P08572	NP_001837.2	Mouse:Col4a2|	Basement Membrane
Core matrisome	Collagens	COL4A3	collagen, type IV, alpha 3 (Goodpasture antigen)	-	2204	2204	H7BXM4:Q01955	NP_000082.2	Mouse:Col4a3|	Basement Membrane
Core matrisome	Collagens	COL4A4	collagen, type IV, alpha 4	CA44	2206	2206	J3KNM7:P53420	NP_000083.3:XP_005246338.1	Mouse:Col4a4|	Basement Membrane
Core matrisome	Collagens	COL4A5	collagen, type IV, alpha 5	ASLN|ATS|CA54|MGC167109|MGC42377	2207	2207	H0Y998:H0Y9H0:H0Y9R8:P29400	NP_000486.1:NP_203699.1:XP_006724679.1	Mouse:Col4a5|	Basement Membrane
Core matrisome	Collagens	COL4A6	collagen, type IV, alpha 6	MGC88184	2208	2208	A8MXH5:B4DZ39:F5H3Q5:F5H851:Q14031	NP_001274688.1:NP_001274689.1:NP_001274689.1:NP_001838.2:NP_378667.1	Mouse:Col4a6|	Basement Membrane
Core matrisome	Collagens	COL5A1	collagen, type V, alpha 1	-	2209	2209	H7BY82:P20908	NP_000084.3	Mouse:Col5a1|
Core matrisome	Collagens	COL5A2	collagen, type V, alpha 2	MGC105115	2210	2210	P05997	NP_000384.2	Mouse:Col5a2|
Core matrisome	Collagens	COL5A3	collagen, type V, alpha 3	-	14864	14864	P25940	NP_056534.2	Mouse:Col5a3|
Core matrisome	Collagens	COL6A1	collagen, type VI, alpha 1	OPLL	2211	2211	P12109	NP_001839.2	Mouse:Col6a1|
Core matrisome	Collagens	COL6A2	collagen, type VI, alpha 2	DKFZp586E1322|FLJ46862|PP3610	2212	2212	C9JH44:H7C0M5:P12110	NP_001840.3:NP_478054.2:NP_478055.2	Mouse:Col6a2|
Core matrisome	Collagens	COL6A3	collagen, type VI, alpha 3	DKFZp686D23123|DKFZp686K04147|DKFZp686N0262|FLJ347	2213	2213	C9JNG9:E7ENL6:E9PCV6:I3L392:P12111	NP_004360.2:NP_476505.3:NP_476506.3:NP_476507.3:NP_476508.2:XP_005246122.1	Mouse:Col6a3|
Core matrisome	Collagens	COL6A5	collagen, type XXIX, alpha 1	COL29A1|FLJ35880|VWA4	26674	26674	A8TX70:E9PAL5:F8W8G8:H0Y393:H0Y935:H0Y9T2	NP_001265227.1:NP_694996.5	Mouse:Col6a5|
Core matrisome	Collagens	COL6A6	collagen, type VI, alpha 6	-	27023	27023	A6NMZ7:F8W6Y7:H0Y940:H0YA33	NP_001096078.1:XP_005247178.1	Mouse:Col6a6|
Core matrisome	Collagens	COL7A1	collagen, type VII, alpha 1	EBD1|EBDCT|EBR1	2214	2214	C9JBL3:Q02388	NP_000085.1	Mouse:Col7a1|
Core matrisome	Collagens	COL8A1	collagen, type VIII, alpha 1	C3orf7|MGC9568	2215	2215	C9JTN9:P27658	NP_001841.2:NP_065084.2	Mouse:Col8a1|
Core matrisome	Collagens	COL8A2	collagen, type VIII, alpha 2	FECD|FECD1|FLJ00201|MGC116970|MGC116972|PPCD|PPCD2	2216	2216	E9PP49:P25067	NP_005193.1:XP_005270535.1:XP_005270536.1	Mouse:Col8a2|
Core matrisome	Collagens	COL9A1	collagen, type IX, alpha 1	DJ149L1.1.2|EDM6|FLJ40263|MED	2217	2217	A6NEQ6:P20849	NP_001842.3:NP_511040.2	Mouse:Col9a1|	FACIT
Core matrisome	Collagens	COL9A2	collagen, type IX, alpha 2	DJ39G22.4|EDM2|MED	2218	2218	B1AKJ1:B1AKJ3:H0Y409:Q14055	NP_001843.1:XP_006710428.1	Mouse:Col9a2|	FACIT
Core matrisome	Collagens	COL9A3	collagen, type IX, alpha 3	DJ885L7.4.1|EDM3|FLJ90759|IDD|MED	2219	2219	Q14050:Q4VXW1	NP_001844.3	Mouse:Col9a3|	FACIT
Core matrisome	Proteoglycans	ACAN	aggrecan	AGC1|AGCAN|CSPG1|CSPGCP|MSK16|SEDK	319	319	E7ENV9:E7EX88:H0YK70:H0YM81:H0YMF1:P16112:Q6PID9	NP_001126.3:NP_037359.3	Mouse:Acan|
Core matrisome	Proteoglycans	ASPN	asporin	FLJ20129|OS3|PLAP1|SLRR1C	14872	14872	C9JGC9:Q05CQ6:Q5TBF2:Q9BXN1	NP_001180264.1:NP_060150.4	Mouse:Aspn|
Core matrisome	Proteoglycans	BCAN	brevican	BEHAB|CSPG7|MGC13038	23059	23059	Q5T3I6:Q5T3I7:Q5T3I8:Q96GW7:V9GXZ8:V9GY88	NP_068767.3:NP_940819.1	Mouse:Bcan|
Core matrisome	Proteoglycans	BGN	biglycan	DSPG1|PG-S1|PGI|SLRR1A	1044	1044	C9JKG1:P21810	NP_001702.1	Mouse:Bgn|
Core matrisome	Proteoglycans	CHAD	chondroadherin	SLRR4A	1909	1909	H0YA03:O15335	NP_001258.2	Mouse:Chad|
Core matrisome	Proteoglycans	CHADL	chondroadherin-like	SLRR4B	25165	25165	B0QYT2:H0Y4I5:Q6NUI6	NP_612490.1	Mouse:Chadl|
Core matrisome	Proteoglycans	DCN	decorin	CSCD|DSPG2|PG40|PGII|PGS2|SLRR1B	2705	2705	F8VNV6:F8VNW0:F8VSI3:F8VU58:F8VUF6:F8VWU0:F8VX58:F8VXZ8:H0YI87:H0YIH3:P07585	NP_001911.1:NP_598010.1:NP_598011.1:NP_598012.1:NP_598013.1:NP_598014.1:XP_005268750.1:XP_006719333.1	Mouse:Dcn|
Core matrisome	Proteoglycans	EPYC	epiphycan	DSPG3|PGLB|Pg-Lb|SLRR3B	3053	3053	F8VSI4:Q99645	NP_004941.2	Mouse:Epyc|
Core matrisome	Proteoglycans	ESM1	endothelial cell-specific molecule 1	endocan	3466	3466	M0R154:Q9NQ30	NP_001129076.1:NP_008967.1	Mouse:Esm1|
Core matrisome	Proteoglycans	FMOD	fibromodulin	SLRR2E	3774	3774	Q06828	NP_002014.2	Mouse:Fmod|
Core matrisome	Proteoglycans	HAPLN1	hyaluronan and proteoglycan link protein 1	CRTL1	2380	2380	D6RAK7:D6RBS1:D6RBX9:D6RC59:D6RFI7:D6RG04:P10915	NP_001875.1	Mouse:Hapln1|
Core matrisome	Proteoglycans	HAPLN2	hyaluronan and proteoglycan link protein 2	BRAL1	17410	17410	Q5T3J1:Q9GZV7	NP_068589.1:XP_005245472.1	Mouse:Hapln2|
Core matrisome	Proteoglycans	HAPLN3	hyaluronan and proteoglycan link protein 3	EXLD1|HsT19883	21446	21446	H3BRY4:H3BT26:H3BTH8:Q96S86	NP_839946.1	Mouse:Hapln3|
Core matrisome	Proteoglycans	HAPLN4	hyaluronan and proteoglycan link protein 4	BRAL2|KIAA1926	31357	31357	Q86UW8	NP_075378.1	Mouse:Hapln4|
Core matrisome	Proteoglycans	HSPG2	heparan sulfate proteoglycan 2	PLC|PRCAN|SJA|SJS|SJS1	5273	5273	H0Y5A9:H7BYA5:H7C4A6:P98160:Q5SZI5:Q5SZI9:Q5SZJ1:Q5SZJ2	NP_001278789.1:NP_005520.4	Mouse:Hspg2|	Basement Membrane
Core matrisome	Proteoglycans	IMPG1	interphotoreceptor matrix proteoglycan 1	GP147|IPM150|SPACR	6055	6055	Q17R60:Q5JSC4:Q68D53	NP_001269297.1:NP_001554.2	Mouse:Impg1|
Core matrisome	Proteoglycans	IMPG2	interphotoreceptor matrix proteoglycan 2	IPM200|SPACRCAN	18362	18362	Q9BZV3	NP_057331.2	Mouse:Impg2|
Core matrisome	Proteoglycans	KERA	keratocan	CNA2|SLRR2B	6309	6309	O60938	NP_008966.1	Mouse:Kera|
Core matrisome	Proteoglycans	LUM	lumican	LDC|SLRR2D	6724	6724	P51884	NP_002336.1	Mouse:Lum|
Core matrisome	Proteoglycans	NCAN	neurocan	CSPG3|FLJ44681	2465	2465	F5H7X3:K7EKF8:O14594	NP_004377.2:XP_005259802.1:XP_005259803.1	Mouse:Ncan|
Core matrisome	Proteoglycans	NYX	nyctalopin	CLRP|CSNB1|CSNB4|MGC138447	8082	8082	Q9GZU5	NP_072089.1:XP_005272689.1	Mouse:Nyx|
Core matrisome	Proteoglycans	OGN	osteoglycin	DKFZp586P2421|OG|OIF|SLRR3A	8126	8126	P20774:Q5TBF5	NP_054776.1:NP_148935.1	Mouse:Ogn|
Core matrisome	Proteoglycans	OMD	osteomodulin	OSAD|SLRR2C	8134	8134	Q99983	NP_005005.1	Mouse:Omd|
Core matrisome	Proteoglycans	OPTC	opticin	OPT	8158	8158	Q5T2G3:Q9UBM4	NP_055174.1	Mouse:Optc|
Core matrisome	Proteoglycans	PODN	podocan	MGC24995|PCAN|SLRR5A	23174	23174	Q7Z5L7	NP_001186009.1:NP_001186010.1:NP_001186011.1:NP_714914.2:XP_005270514.1	Mouse:Podn|
Core matrisome	Proteoglycans	PODNL1	podocan-like 1	FLJ23447|SLRR5B	26275	26275	B7Z3M0:K7EJ07:K7EMV0:K7EPI2:K7EPR1:K7ER84:K7ERE6:K7ESB1:Q6PEZ8	NP_001139726.1:NP_001139727.1:NP_079101.3:NP_001139726.1:NP_079101.3	Mouse:Podnl1|
Core matrisome	Proteoglycans	PRELP	proline/arginine-rich end leucine-rich repeat protein	MGC45323|MST161|MSTP161|SLRR2A	9357	9357	P51888	NP_002716.1:NP_958505.1	Mouse:Prelp|
Core matrisome	Proteoglycans	PRG2	proteoglycan 2, bone marrow (natural killer cell activator, eosinophil granule major basic protein)	BMPG|MBP|MBP1|MGC14537	9362	9362	A6XMW0:P13727	NP_001230174.1:NP_002719.3	Mouse:Prg2|
Core matrisome	Proteoglycans	PRG3	proteoglycan 3	MBP2|MBPH|MGC126662|MGC141971	9363	9363	Q9Y2Y8	NP_006084.2	Mouse:Prg3|
Core matrisome	Proteoglycans	PRG4	p53-responsive gene 4	-	9364	9364	E7EQ48:E9PLR3:J3KP74:Q92954	NP_001121180.1:NP_001121181.1:NP_001121182.1:NP_005798.2	Mouse:Prg4|
Core matrisome	Proteoglycans	SPOCK1	sparc/osteonectin, cwcv and kazal-like domains proteoglycan (testican) 1	FLJ37170|SPOCK|TESTICAN|TIC1	11251	11251	D6RAM7:D6RB21:D6RFX3:Q08629	NP_004589.1	Mouse:Spock1|
Core matrisome	Proteoglycans	SPOCK2	sparc/osteonectin, cwcv and kazal-like domains proteoglycan (testican) 2	FLJ97039|testican-2	13564	13564	F5H283:Q92563	NP_001127906.1:NP_001231879.1:NP_055582.1:XP_005270359.1	Mouse:Spock2|
Core matrisome	Proteoglycans	SPOCK3	sparc/osteonectin, cwcv and kazal-like domains proteoglycan (testican) 3	HSAJ1454|TES-3	13565	13565	B4DG04:E7EMP8:E7ENM6:E7ENT7:E7ENY3:E7EQ24:E7ESN1:E7EVH4:H0YA19:Q4W5S3:Q9BQ16	NP_001035249.1:NP_001191281.1:NP_001191282.1:NP_001191283.1:NP_001191284.1:NP_001191285.1:NP_001191287.1:NP_001238896.1:NP_058646.2	Mouse:Spock3|
Core matrisome	Proteoglycans	SRGN	serglycin	FLJ12930|MGC9289|PPG|PRG|PRG1	9361	9361	P10124	NP_002718.2	Mouse:Srgn|
Core matrisome	Proteoglycans	VCAN	versican	CSPG2|DKFZp686K06110|ERVR|GHAP|PG-M|WGN|WGN1	2464	2464	D6RGZ6:E9PF17:P13611:Q86W61	NP_001119808.1:NP_001119808.1:NP_001157569.1:NP_001157570.1:NP_004376.2	Mouse:Vcan|
Matrisome-associated	ECM-affiliated Proteins	ANXA1	annexin A1	ANX1|LPC1	533	533	P04083:Q5T3N0:Q5T3N1	NP_000691.1	Mouse:Anxa1|	Annexin
Matrisome-associated	ECM-affiliated Proteins	ANXA10	annexin A10	ANX14	534	534	Q9UJ72	NP_009124.2	Mouse:Anxa10|	Annexin
Matrisome-associated	ECM-affiliated Proteins	ANXA11	annexin A11	ANX11|CAP50	535	535	H0Y6E1:P50995:Q5T0G7:Q5T0G9	NP_001148.1:NP_001265336.1:NP_001265337.1:NP_001265338.1:NP_665875.1:NP_665876.1	Mouse:Anxa11|	Annexin
Matrisome-associated	ECM-affiliated Proteins	ANXA13	annexin A13	ANX13|ISA|MGC150460	536	536	E5RIN3:P27216	NP_001003954.1:NP_004297.2	Mouse:Anxa13|	Annexin
Matrisome-associated	ECM-affiliated Proteins	ANXA2	annexin A2	ANX2|ANX2L4|CAL1H|LIP2|LPC2|LPC2D|P36|PAP-IV	537	537	H0YKL9:H0YKN4:H0YKS4:H0YKV8:H0YKX9:H0YKZ7:H0YL33:H0YLE2:H0YLV6:H0YM50:H0YMD0:H0YMD9:H0YMM1:H0YMT9:H0YMU9:H0YMW4:H0YN28:H0YN42:H0YN52:H0YNA0:H0YNB8:H0YNP5:P07355	NP_001002857.1:NP_001002858.1:NP_001129487.1:NP_004030.1	Mouse:Anxa2|	Annexin
Matrisome-associated	ECM-affiliated Proteins	ANXA3	annexin A3	ANX3	541	541	D6RA82:D6RAZ8:D6RCA8:D6RFG5:D6RFJ9:P12429	NP_005130.1:XP_005263030.1	Mouse:Anxa3|	Annexin
Matrisome-associated	ECM-affiliated Proteins	ANXA4	annexin A4	ANX4|DKFZp686H02120|MGC75105|PIG28|ZAP36	542	542	B4DDF9:P09525:Q6P452	NP_001144.1	Mouse:Anxa4|	Annexin
Matrisome-associated	ECM-affiliated Proteins	ANXA5	annexin A5	ANX5|ENX2|PP4	543	543	D6RBE9:D6RBL5:D6RCN3:E9PHT9:P08758	NP_001145.1	Mouse:Anxa5|	Annexin
Matrisome-associated	ECM-affiliated Proteins	ANXA6	annexin A6	ANX6|CBP68	544	544	A6NN80:E5RFF0:E5RI05:E5RIU8:E5RJF5:E5RJR0:E5RK63:E5RK69:E7EMC6:H0YC77:P08133	NP_001146.2:NP_001180473.1:XP_005268489.1	Mouse:Anxa6|	Annexin
Matrisome-associated	ECM-affiliated Proteins	ANXA7	annexin A7	ANX7|SNX|SYNEXIN	545	545	B4DT77:B9ZVT2:P20073	NP_001147.1:NP_004025.1	Mouse:Anxa7|	Annexin
Matrisome-associated	ECM-affiliated Proteins	ANXA8	annexin A8	ANX8|FLJ53095	546	546	B4DTC9:P13928:Q5VTM3	NP_001035173.1:NP_001092315.2:NP_001258631.1:NP_001258632.1	Mouse:Anxa8|	Annexin
Matrisome-associated	ECM-affiliated Proteins	ANXA8L1	annexin A8-like 1	bA301J7.3	23334	23334	F5H7X5:Q5T2P7:Q5T2P8	NP_001258632.1		Annexin
Matrisome-associated	ECM-affiliated Proteins	ANXA9	annexin A9	ANX31	547	547	O76027	NP_003559.2	Mouse:Anxa9|	Annexin
Matrisome-associated	ECM-affiliated Proteins	C1QA	complement component 1, q subcomponent, A chain	-	1241	1241	P02745:X6RLJ0	NP_057075.1	Mouse:C1qa|
Matrisome-associated	ECM-affiliated Proteins	C1QB	complement component 1, q subcomponent, B chain	-	1242	1242	D6R934:D6RGJ1:P02746	NP_000482.3:XP_005246039.1	Mouse:C1qb|
Matrisome-associated	ECM-affiliated Proteins	C1QC	complement component 1, q subcomponent, C chain	C1Q-C|C1QG|FLJ27103	1245	1245	P02747	NP_001107573.1:NP_758957.2	Mouse:C1qc|
Matrisome-associated	ECM-affiliated Proteins	C1QL1	complement component 1, q subcomponent-like 1	C1QRF|CRF	24182	24182	O75973	NP_006679.1	Mouse:C1ql1|
Matrisome-associated	ECM-affiliated Proteins	C1QL2	complement component 1, q subcomponent-like 2	C1QTNF10|CTRP10	24181	24181	Q7Z5L3	NP_872334.2	Mouse:C1ql2|
Matrisome-associated	ECM-affiliated Proteins	C1QL3	complement component 1, q subcomponent-like 3	C1QTNF13|C1ql|K100	19359	19359	Q5VWW1	NP_001010908.1	Mouse:C1ql3|
Matrisome-associated	ECM-affiliated Proteins	C1QL4	complement component 1, q subcomponent-like 4	C1QTNF11|MGC131708	31416	31416	Q86Z23	NP_001008224.1	Mouse:C1ql4|
Matrisome-associated	ECM-affiliated Proteins	C1QTNF1	C1q and tumor necrosis factor related protein 1	CTRP1|FLJ90694|GIP|ZSIG37	14324	14324	Q6ZMH6:Q9BXJ1	NP_112230.1:NP_699203.1:NP_940995.1:NP_940996.1:XP_006721730.1:XP_006721729.1	Mouse:C1qtnf1|
Matrisome-associated	ECM-affiliated Proteins	C1QTNF2	C1q and tumor necrosis factor related protein 2	CTRP2|zacrp2	14325	14325	Q9BXJ5	NP_114114.2	Mouse:C1qtnf2|
Matrisome-associated	ECM-affiliated Proteins	C1QTNF3	C1q and tumor necrosis factor related protein 3	C1ATNF3|CORS26|CTRP3|Corcs|Cors|Cors-26|FLJ37576	14326	14326	Q9BXJ4	NP_112207.1:NP_852100.3	Mouse:C1qtnf3|
Matrisome-associated	ECM-affiliated Proteins	C1QTNF4	C1q and tumor necrosis factor related protein 4	CTRP4|ZACRP4	14346	14346	E9PPZ5:Q9BXJ3	NP_114115.2	Mouse:C1qtnf4|
Matrisome-associated	ECM-affiliated Proteins	C1QTNF5	C1q and tumor necrosis factor related protein 5	CTRP5|DKFZp586B0621|FLJ30570|LORD	14344	14344	Q9BXJ0	NP_001265360.1:NP_056460.1	Mouse:C1qtnf5|
Matrisome-associated	ECM-affiliated Proteins	C1QTNF6	C1q and tumor necrosis factor related protein 6	CTRP6|ZACRP6	14343	14343	F8WC87:Q9BXI9	NP_114116.3:NP_872292.1:XP_005261382.1:XP_006724188.1	Mouse:C1qtnf6|
Matrisome-associated	ECM-affiliated Proteins	C1QTNF7	C1q and tumor necrosis factor related protein 7	CTRP7|ZACRP7	14342	14342	J3KPK0:Q9BXJ2	NP_001128642.1:NP_001128643.1:NP_114117.1	Mouse:C1qtnf7|
Matrisome-associated	ECM-affiliated Proteins	C1QTNF8	C1q and tumor necrosis factor related protein 8	CTRP8|UNQ5829	31374	31374	P60827	NP_997302.2
Matrisome-associated	ECM-affiliated Proteins	C1QTNF9	C1q and tumor necrosis factor related protein 9	C1QTNF9A|CTRP9|MGC48915	28732	28732	P0C862	NP_848635.2	Mouse:C1qtnf9|
Matrisome-associated	ECM-affiliated Proteins	CD209	CD209 molecule	CDSIGN|CLEC4L|DC-SIGN|DC-SIGN1|MGC129965	1641	1641	M0QZG5:M0R0P0:Q9NNX6:X6RB12	NP_001138365.1:NP_001138365.1:NP_001138366.1:NP_001138367.1:NP_001138368.1:NP_001138369.1:NP_066978.1:NP_001138371.1	Mouse:Cd209a|
Matrisome-associated	ECM-affiliated Proteins	CLC	Charcot-Leyden crystal protein	LGALS10|LGALS10A|LPPL_HUMAN|MGC149659	2014	2014	Q05315	NP_001819.2	Mouse:Clc|
Matrisome-associated	ECM-affiliated Proteins	CLEC10A	C-type lectin domain family 10, member A	CD301|CLECSF13|CLECSF14|HML|HML2	16916	16916	I3NI09:J3KR22:Q8IUN9	NP_006335.2:NP_878910.1:XP_005256469.1	Mouse:Clec10a|
Matrisome-associated	ECM-affiliated Proteins	CLEC11A	C-type lectin domain family 11, member A	CLECSF3|LSLCL|P47|SCGF	10576	10576	M0R081:Q9Y240	NP_002966.1	Mouse:Clec11a|
Matrisome-associated	ECM-affiliated Proteins	CLEC12A	C-type lectin domain family 12, member A	CLL-1|CLL1|DCAL-2|MGC70602|MICL	31713	31713	A8MVL9:Q5QGZ9	NP_001193939.1:NP_612210.4:NP_963917.2:XP_005253381.1:XP_006719097.1:XP_006719100.1	Mouse:Clec12a|
Matrisome-associated	ECM-affiliated Proteins	CLEC12B	C-type lectin domain family 12, member B	UNQ5782	31966	31966	F5H4H7:Q2HXU8	NP_001123470.1:NP_995324.2:XP_006719134.1:XP_006719135.1	Mouse:Clec12b|
Matrisome-associated	ECM-affiliated Proteins	CLEC14A	C-type lectin domain family 14, member A	C14orf27|CEG1	19832	19832	Q86T13	NP_778230.1	Mouse:Clec14a|
Matrisome-associated	ECM-affiliated Proteins	CLEC17A	C-type lectin domain family 17, member A	FLJ45910	34520	34520	F8W1T8:H9KVA4:Q6ZS10	NP_001191047.1:NP_997273.3
Matrisome-associated	ECM-affiliated Proteins	CLEC18A	C-type lectin domain family 18, member A	CLEC18C|FLJ77955|MGC164804|MRCL|MRCL1	30388	30388	A5D8T8:F8W692:H3BNR9	NP_001129686.1:NP_001258126.1:NP_872425.2:XP_005255991.1	Mouse:Clec18a|
Matrisome-associated	ECM-affiliated Proteins	CLEC18B	C-type lectin domain family 18, member B	MRCL2	33849	33849	Q6UXF7	NP_001011880.2	Mouse:Clec18a|
Matrisome-associated	ECM-affiliated Proteins	CLEC18C	C-type lectin domain family 18, member C	MGC34761|MRCL|MRCL3	28538	28538	F5H550:H3BSF2:H3BUD1:Q8NCF0	NP_775890.2	Mouse:Clec18a|
Matrisome-associated	ECM-affiliated Proteins	CLEC19A	C-type lectin domain family 19, member A	UNQ5810/PRO19627	34522	34522	H3BQW0:H3BQX8:Q6UXS0	NP_001243649.1
Matrisome-associated	ECM-affiliated Proteins	CLEC1A	C-type lectin domain family 1, member A	CLEC1|MGC34328	24355	24355	E7ESV9:E9PFB4:F5H038:F8WCT4:Q8NC01	NP_057595.2:XP_005253440.1	Mouse:Clec1a|
Matrisome-associated	ECM-affiliated Proteins	CLEC1B	C-type lectin domain family 1, member B	1810061I13Rik|CLEC2|CLEC2B|PRO1384|QDED721	24356	24356	H7BYT7:Q9P126	NP_001092901.1:NP_057593.3:XP_005253439.1	Mouse:Clec1b|
Matrisome-associated	ECM-affiliated Proteins	CLEC2A	C-type lectin domain family 2, member A	PILAR|UNQ5792	24191	24191	Q6UVW9	NP_001124183.1:XP_005253423.1	Mouse:Clec2d|Mouse:Clec2e|Mouse:Clec2g|Mouse:Clec2h|Mouse:Clec2i|Mouse:Clec2j|
Matrisome-associated	ECM-affiliated Proteins	CLEC2B	C-type lectin domain family 2, member B	AICL|CLECSF2|HP10085|IFNRG1	2053	2053	F5H631:Q92478	NP_005118.2	Mouse:Clec2d|Mouse:Clec2e|Mouse:Clec2g|Mouse:Clec2h|Mouse:Clec2i|Mouse:Clec2j|
Matrisome-associated	ECM-affiliated Proteins	CLEC2D	C-type lectin domain family 2, member D	CLAX|LLT1|OCIL	14351	14351	F5H0P0:F5H5U4:F8WF99:H0YGG6:H0YH49:Q9UHP7	NP_001004419.1:NP_001184246.1:NP_001184247.1:NP_001184248.1:NP_037401.1	Mouse:Clec2d|Mouse:Clec2e|Mouse:Clec2g|Mouse:Clec2h|Mouse:Clec2i|Mouse:Clec2j|
Matrisome-associated	ECM-affiliated Proteins	CLEC2L	C-type lectin domain family 2, member L	FLJ32986	21969	21969	H0YB20:P0C7M8	NP_001073980.2	Mouse:Clec2l|
Matrisome-associated	ECM-affiliated Proteins	CLEC3A	C-type lectin domain family 3, member A	CLECSF1|MGC129558|MGC129559	2052	2052	H3BTK1:J3KNC9:O75596	NP_005743.4	Mouse:Clec3a|
Matrisome-associated	ECM-affiliated Proteins	CLEC3B	C-type lectin domain family 3, member B	DKFZp686H17246|TN|TNA	11891	11891	E9PHK0:P05452	NP_003269.2:XP_005265483.1	Mouse:Clec3b|
Matrisome-associated	ECM-affiliated Proteins	CLEC4A	C-type lectin domain family 4, member A	CLECSF6|DCIR|DDB27|HDCGC13P|LLIR	13257	13257	H0YGF9:Q9UMR7	NP_057268.1:NP_919429.2:NP_919430.1:NP_919432.1	Mouse:Clec4a1|Mouse:Clec4a2|Mouse:Clec4a3|Mouse:Clec4a4|Mouse:Clec4b1|Mouse:Clec4b2|
Matrisome-associated	ECM-affiliated Proteins	CLEC4C	C-type lectin domain family 4, member C	BDCA2|CD303|CLECSF11|CLECSF7|DLEC|HECL|MGC125789|M	13258	13258	H0YFH6:H0YGB2:Q8WTT0	NP_569708.1:NP_987099.1	Mouse:Clec4a1|Mouse:Clec4a2|Mouse:Clec4a3|Mouse:Clec4a4|Mouse:Clec4b1|Mouse:Clec4b2|
Matrisome-associated	ECM-affiliated Proteins	CLEC4D	C-type lectin domain family 4, member D	CLEC-6|CLEC6|CLECSF8|MCL|MGC40078|MPCL	14554	14554	A6NHA5:Q8WXI8	NP_525126.2	Mouse:Clec4d|
Matrisome-associated	ECM-affiliated Proteins	CLEC4E	C-type lectin domain family 4, member E	CLECSF9|MINCLE	14555	14555	F5H5X7:F8WFA1:H0YGH9:Q9ULY5	NP_055173.1	Mouse:Clec4e|
Matrisome-associated	ECM-affiliated Proteins	CLEC4F	C-type lectin domain family 4, member F	CLECSF13|FLJ39110|KCLR	25357	25357	A4QPA5:Q8N1N0	NP_775806.2:XP_005264229.1	Mouse:Clec4f|
Matrisome-associated	ECM-affiliated Proteins	CLEC4G	C-type lectin domain family 4, member G	LP2698|LSECtin|UNQ431	24591	24591	M0R277:Q6UXB4	NP_940894.1	Mouse:Clec4g|
Matrisome-associated	ECM-affiliated Proteins	CLEC4M	C-type lectin domain family 4, member M	CD209L|CD299|DC-SIGN2|DC-SIGNR|DCSIGNR|HP10347|L-S	13523	13523	E7ENS9:H7BXE2:H7BXU4:M0QYX2:M0QZ42:Q9H2X3	NP_001138376.1:NP_001138377.1:NP_001138378.1:NP_001138379.1:NP_001138380.1:NP_001138381.1:NP_001138382.1:NP_001138383.1:NP_055072.3:XP_006722678.1	Mouse:Cd209d|
Matrisome-associated	ECM-affiliated Proteins	CLEC5A	C-type lectin domain family 5, member A	CLECSF5|MDL-1|MDL1|MGC138304	2054	2054	C9JCE4:C9JPR7:F8WCL0:Q14DL9:Q9NY25	NP_037384.1:XP_005250022.1	Mouse:Clec5a|
Matrisome-associated	ECM-affiliated Proteins	CLEC6A	C-type lectin domain family 6, member A	CLECSF10|dectin-2	14556	14556	Q6EIG7	NP_001007034.1	Mouse:Clec4n|
Matrisome-associated	ECM-affiliated Proteins	CLEC7A	C-type lectin domain family 7, member A	BGR|CANDF4|CLECSF12|DECTIN1	14558	14558	Q68D78:Q9BXN2	NP_072092.2:NP_922938.1:NP_922939.1:NP_922940.1:NP_922941.1:NP_072092.2:NP_922938.1:NP_922939.1:NP_922940.1:NP_922941.1:NP_922945.1:XP_005253524.1:XP_005253525.1:XP_006719198.1:XP_006719199.1	Mouse:Clec7a|
Matrisome-associated	ECM-affiliated Proteins	CLEC9A	C-type lectin domain family 9, member A	DNGR1|UNQ9341	26705	26705	Q6UXN8	NP_997228.1	Mouse:Clec9a|
Matrisome-associated	ECM-affiliated Proteins	COLEC10	collectin sub-family member 10 (C-type lectin)	CLL1|MGC118794|MGC118795	2220	2220	Q9Y6Z7	NP_006429.2	Mouse:Colec10|
Matrisome-associated	ECM-affiliated Proteins	COLEC11	collectin sub-family member 11	CL-K1-I|CL-K1-II|CL-K1-IIa|CL-K1-IIb|CLK1|DKFZp686	17213	17213	C9JWT5:F8WB29:Q9BWP8	NP_001242911.1:NP_001242912.1:NP_001242913.1:NP_001242914.1:NP_001242915.1:NP_001242916.1:NP_001242917.1:NP_001242918.1:NP_076932.1:NP_954705.1	Mouse:Colec11|
Matrisome-associated	ECM-affiliated Proteins	COLEC12	collectin sub-family member 12	CLP1|NSR2|SCARA4|SRCL	16016	16016	Q5KU26	NP_569057.1	Mouse:Colec12|
Matrisome-associated	ECM-affiliated Proteins	CSPG4	chondroitin sulfate proteoglycan 4	HMW-MAA|MCSP|MCSPG|MEL-CSPG|MSK16|NG2	2466	2466	Q6UVK1	NP_001888.2	Mouse:Cspg4|
Matrisome-associated	ECM-affiliated Proteins	CSPG5	chondroitin sulfate proteoglycan 5 (neuroglycan C)	MGC44034|NGC	2467	2467	O95196	NP_001193872.1:NP_001193873.1:NP_006565.2	Mouse:Cspg5|
Matrisome-associated	ECM-affiliated Proteins	ELFN1	extracellular leucine-rich repeat and fibronectin type III domain containing 1	-	33154	33154	P0C7U0	NP_001122108.1:XP_006715788.1:XP_006715789.1:XP_006715790.1:XP_006715791.1:XP_006715792.1	Mouse:Elfn1|
Matrisome-associated	ECM-affiliated Proteins	ELFN2	extracellular leucine-rich repeat and fibronectin type III domain containing 2	KIAA1904|LRRC62|dJ63G5.3	29396	29396	Q5R3F8	NP_443138.2:XP_005261381.1:XP_006724186.1:XP_006724187.1	Mouse:Elfn2|
Matrisome-associated	ECM-affiliated Proteins	EMCN	endomucin	EMCN2|MUC14	16041	16041	D6RHW5:H0YAA7:Q9ULC0	NP_001153166.1:NP_057326.2	Mouse:Emcn|
Matrisome-associated	ECM-affiliated Proteins	FCN1	ficolin (collagen/fibrinogen domain containing) 1	FCNM	3623	3623	O00602	NP_001994.2	Mouse:Fcna|
Matrisome-associated	ECM-affiliated Proteins	FCN2	ficolin (collagen/fibrinogen domain containing lectin) 2 (hucolin)	EBP-37|FCNL|P35|ficolin-2	3624	3624	Q15485	NP_004099.2:NP_056652.1	Mouse:Fcnb|
Matrisome-associated	ECM-affiliated Proteins	FCN3	ficolin (collagen/fibrinogen domain containing) 3 (Hakata antigen)	FCNH|HAKA1|MGC22543	3625	3625	O75636:Q5SSB9	NP_003656.2:NP_775628.1
Matrisome-associated	ECM-affiliated Proteins	FREM1	FRAS1 related extracellular matrix 1	BNAR|C9orf143|C9orf145|C9orf154|FLJ25461|QBRICK|RP	23399	23399	C9JT55:F8WE85:Q5H8C1	NP_001171175.1:NP_659403.4:XP_005251439.1:XP_005251441.1:XP_006716786.1:XP_006716792.1	Mouse:Frem1|
Matrisome-associated	ECM-affiliated Proteins	FREM2	FRAS1 related extracellular matrix protein 2	DKFZp686J0811|DKFZp781I048|KIAA1074	25396	25396	Q5SZK8	NP_997244.4	Mouse:Frem2|
Matrisome-associated	ECM-affiliated Proteins	FREM3	FRAS1 related extracellular matrix 3	-	25172	25172	P0C091	NP_001161707.1	Mouse:Frem3|
Matrisome-associated	ECM-affiliated Proteins	GPC1	glypican 1	FLJ38078|glypican	4449	4449	C9J4Y6:H7BZE9:H7BZL4:H7C024:H7C410:P35052	NP_002072.2	Mouse:Gpc1|	Glypican
Matrisome-associated	ECM-affiliated Proteins	GPC2	glypican 2	DKFZp547M109|FLJ38962	4450	4450	Q8N158	NP_689955.1	Mouse:Gpc2|	Glypican
Matrisome-associated	ECM-affiliated Proteins	GPC3	glypican 3	DGSX|GTR2-2|MXR7|OCI-5|SDYS|SGB|SGBS|SGBS1	4451	4451	H0Y3U6:P51654	NP_001158089.1:NP_001158091.1:NP_004475.1	Mouse:Gpc3|	Glypican
Matrisome-associated	ECM-affiliated Proteins	GPC4	glypican 4	K-glypican	4452	4452	B4E2C0:O75487	NP_001439.2	Mouse:Gpc4|	Glypican
Matrisome-associated	ECM-affiliated Proteins	GPC5	glypican 5	-	4453	4453	P78333	NP_004457.1	Mouse:Gpc5|	Glypican
Matrisome-associated	ECM-affiliated Proteins	GPC6	glypican 6	MGC126288|OMIMD1	4454	4454	Q9Y625	NP_005699.1	Mouse:Gpc6|
Matrisome-associated	ECM-affiliated Proteins	GREM1	gremlin 1, cysteine knot superfamily, homolog (Xenopus laevis)	CKTSF1B1|DAND2|DRM|GREMLIN|IHG-2|MGC126660|PIG2	2001	2001	H0YLY2:O60565	NP_001178252.1:NP_037504.1	Mouse:Grem1|
Matrisome-associated	ECM-affiliated Proteins	GRIFIN	galectin-related inter-fiber protein	-	4577	4577	A4D1Z8	NP_001278713.1	Mouse:Grifin|
Matrisome-associated	ECM-affiliated Proteins	HPX	hemopexin	FLJ56652|HX	5171	5171	P02790	NP_000604.1:XP_005252940.1	Mouse:Hpx|
Matrisome-associated	ECM-affiliated Proteins	HSPC159	galectin-related protein	GRP|MGC33751|MGC71953	25012	25012	B9A055:F8WF17:Q3ZCW2:U3KQ88:U3KQU5	NP_054900.2	Mouse:Lgalsl|
Matrisome-associated	ECM-affiliated Proteins	ITLN1	intelectin 1 (galactofuranose binding)	FLJ20022|HL-1|HL1|INTL|ITLN|LFR|hIntL|omentin	18259	18259	Q8WWA0	NP_060095.2	Mouse:Itln1|
Matrisome-associated	ECM-affiliated Proteins	ITLN2	intelectin 2	HL-2|HL2	20599	20599	Q8WWU7	NP_543154.1	Mouse:Itlnb|
Matrisome-associated	ECM-affiliated Proteins	LGALS1	lectin, galactoside-binding, soluble, 1	DKFZp686E23103|GAL1|GBP	6561	6561	F8WCQ5:F8WEI7:P09382	NP_002296.1	Mouse:Lgals1|	Galectin
Matrisome-associated	ECM-affiliated Proteins	LGALS12	lectin, galactoside-binding, soluble, 12	GALECTIN-12|GRIP1	15788	15788	G5E970:Q96DT0	NP_001136007.1:NP_001136007.1:NP_001136008.1:NP_001136009.1:NP_001136010.1:NP_149092.2	Mouse:Lgals12|	Galectin
Matrisome-associated	ECM-affiliated Proteins	LGALS13	lectin, galactoside-binding, soluble, 13	GAL13|PLAC8|PP13	15449	15449	M0R015:Q9UHV8	NP_037400.1		Galectin
Matrisome-associated	ECM-affiliated Proteins	LGALS14	lectin, galactoside-binding, soluble, 14	CLC2|MGC22235|PPL13	30054	30054	M0R163:Q8TCE9	NP_064514.1:NP_982297.1		Galectin
Matrisome-associated	ECM-affiliated Proteins	LGALS16	beta-galactoside-binding lectin	-	40039	40039	A8MUM7:M0R108	NP_001177370.2		Galectin
Matrisome-associated	ECM-affiliated Proteins	LGALS2	lectin, galactoside-binding, soluble, 2	HL14|MGC75071	6562	6562	B0QYC9:P05162	NP_006489.1	Mouse:Lgals2|	Galectin
Matrisome-associated	ECM-affiliated Proteins	LGALS3	lectin, galactoside-binding, soluble, 3	CBP35|GAL3|GALBP|GALIG|LGALS2|MAC2	6563	6563	G3V3R6:G3V407:P17931	NP_002297.2	Mouse:Lgals3|	Galectin
Matrisome-associated	ECM-affiliated Proteins	LGALS4	lectin, galactoside-binding, soluble, 4	GAL4|L36LBP	6565	6565	M0QZ93:M0R1B2:M0R349:P56470	NP_006140.1	Mouse:Lgals4|	Galectin
Matrisome-associated	ECM-affiliated Proteins	LGALS7	lectin, galactoside-binding, soluble, 7	GAL7|LGALS7A	6568	6568	M0R281:P47929	NP_001035972.1:NP_002298.1	Mouse:Lgals7|	Galectin
Matrisome-associated	ECM-affiliated Proteins	LGALS8	lectin, galactoside-binding, soluble, 8	Gal-8|PCTA-1|PCTA1|Po66-CBP	6569	6569	B1ANM0:E9PJ77:E9PN19:E9PNC2:E9PPL1:E9PPM4:E9PRN3:F6V2D4:H7BXD8:O00214:Q5T3P9	NP_006490.3:NP_963837.1:NP_963838.1:NP_963839.1	Mouse:Lgals8|	Galectin
Matrisome-associated	ECM-affiliated Proteins	LGALS9	lectin, galactoside-binding, soluble, 9	HUAT|LGALS9A|MGC117375|MGC125973|MGC125974	6570	6570	B4DWP7:F8W9W4:J3KS82:J3KSA0:J3QKK6:J3QS92:K7EPS0:O00182:Q8WYQ7	NP_002299.2:NP_033665.1:XP_006721955.1:XP_006721957.1	Mouse:Lgals9|	Galectin
Matrisome-associated	ECM-affiliated Proteins	LGALS9B	lectin, galactoside-binding, soluble, 9B	FLJ58146|FLJ75081	24842	24842	J3QRN8:J3QSC5:Q3B8N2	NP_001036150.1		Galectin
Matrisome-associated	ECM-affiliated Proteins	LGALS9C	lectin, galactoside-binding, soluble, 9C	MGC125972	33874	33874	C9JHN9:J3KRF0:J3KSV0:J3KSY2:J3KT17:J3QKS2:J3QR96:J3QSH0:Q6DKI2	NP_001035167.2:XP_005256827.1		Galectin
Matrisome-associated	ECM-affiliated Proteins	LMAN1	lectin, mannose-binding, 1	ERGIC-53|ERGIC53|F5F8D|FMFD1|MCFD1|MR60|gp58	6631	6631	P49257	NP_005561.1	Mouse:Lman1|
Matrisome-associated	ECM-affiliated Proteins	LMAN1L	lectin, mannose-binding, 1 like	UNQ2784/PRO7174, ERGIC-53L, ERGL	6632	6632	H3BN74:H3BSC9:Q9HAT1	NP_068591.2	Mouse:Lman1l|
Matrisome-associated	ECM-affiliated Proteins	MBL2	mannose-binding lectin (protein C) 2, soluble (opsonic defect)	COLEC1|HSMBPC|MBL|MBP|MBP1|MGC116832|MGC116833	6922	6922	P11226	NP_000233.1:XP_006717924.1	Mouse:Mbl2|
Matrisome-associated	ECM-affiliated Proteins	MUC1	mucin 1, cell surface associated	CD227|EMA|H23AG|KL-6|MAM6|PEM|PEMT|PUM	7508	7508	B1AVQ5:B1AVQ7:P15941	NP_001018016.1:NP_001018017.1:NP_001037855.1:NP_001037856.1:NP_001037857.1:NP_001037858.1:NP_001191214.1:NP_001191215.1:NP_001191216.1:NP_001191217.1:NP_001191218.1:NP_001191219.1:NP_001191220.1:NP_001191221.1:NP_001191222.1:NP_001191223.1:NP_001191224.1:NP_001191225.1:NP_001191226.1:NP_002447.4:NP_001191214.1	Mouse:Muc1|	Mucin
Matrisome-associated	ECM-affiliated Proteins	MUC12	mucin 12, cell surface associated	MUC11	7510	7510	F5GWV9:H7BXN1:Q9UKN1	NP_001157934.1	Mouse:Muc12|	Mucin
Matrisome-associated	ECM-affiliated Proteins	MUC13	mucin 13, cell surface associated	DRCC1|FLJ20063	7511	7511	C9IZG1:Q9H3R2	NP_149038.3	Mouse:Muc13|	Mucin
Matrisome-associated	ECM-affiliated Proteins	MUC15	mucin 15, cell surface associated	PAS3|PASIII	14956	14956	E9PII6:F8W945:Q8N387	NP_001128563.1:NP_001128563.1:NP_001128564.1:NP_663625.2:NP_001128564.1	Mouse:Muc15|	Mucin
Matrisome-associated	ECM-affiliated Proteins	MUC16	mucin 16, cell surface associated	CA125|FLJ14303	15582	15582	B5ME49:F8WE81:M0QZZ9:M0R2S7:M0R2Y5:Q8WXI7	NP_078966.2	Mouse:Muc16|	Mucin
Matrisome-associated	ECM-affiliated Proteins	MUC17	mucin 17, cell surface associated	MUC3	16800	16800	E7EPM4:Q685J3	NP_001035194.1		Mucin
Matrisome-associated	ECM-affiliated Proteins	MUC19	mucin 19, oligomeric	FLJ35746	14362	14362	C9JCE7:H0YH61:H7BZA9:Q7Z5P9:V9GY53	NP_775871.2	Mouse:Muc19|	Mucin
Matrisome-associated	ECM-affiliated Proteins	MUC2	mucin 2, oligomeric mucus/gel-forming	MLP|SMUC	7512	7512	E7EUV1:H0Y2U6:H0Y317:Q02817	NP_002448.3	Mouse:Muc2|	Mucin
Matrisome-associated	ECM-affiliated Proteins	MUC20	mucin 20, cell surface associated	FLJ14408|FLJ53153|KIAA1359	23282	23282	C9JJE7:E9PH32:H7C102:Q8N307	NP_001269435.1:NP_001278762.1:NP_065841.1:NP_689886.3	Mouse:Muc20|	Mucin
Matrisome-associated	ECM-affiliated Proteins	MUC21	mucin 21, cell surface associated	C6orf205|KMQK697|MGC125609|bCX31G15.2	21661	21661	Q5SSG8	NP_001010909.2:XP_005275180.1	Mouse:Gm9573|	Mucin
Matrisome-associated	ECM-affiliated Proteins	MUC22	hypothetical LOC729792	LOC729792	39755	39755	E2RYF6	NP_001185744.1	Mouse:Gm9573|
Matrisome-associated	ECM-affiliated Proteins	MUC3A	mucin 3A, cell surface associated	MUC3|mucin|MUC3B	7513	7513	H0Y6M1:J3QST7:Q02505	NP_005951.1	Mouse:Muc3|	Mucin
Matrisome-associated	ECM-affiliated Proteins	MUC4	mucin 4, cell surface associated	HSA276359	7514	7514	E7ENC5:E7EQG8:E7EQT2:E7ERK0:E7ETT5:E7EUL9:E7EW47:E7EWN1:E9PDY6:H0Y2Y1:H7BXN7:H7BZI3:Q99102	NP_004523.3:NP_060876.5:NP_612154.2:NP_060876.5	Mouse:Muc4|	Mucin
Matrisome-associated	ECM-affiliated Proteins	MUC5AC	mucin 5AC, oligomeric mucus/gel-forming	MUC5	7515	7515	E9PGF7:E9PJ98:P98088	XP_006718462.1:XP_006710008.1:XP_006710010.1:	Mouse:Muc5ac|	Mucin
Matrisome-associated	ECM-affiliated Proteins	MUC5B	mucin 5B, oligomeric mucus/gel-forming	MG1|MUC5|MUC9	7516	7516	E9PBJ0:H0YDX8:Q9HC84	NP_002449.2	Mouse:Muc5b|	Mucin
Matrisome-associated	ECM-affiliated Proteins	MUC6	mucin 6, oligomeric mucus/gel-forming	-	7517	7517	E9PJC5:H0YDA7:H0YEZ6:Q6W4X9	NP_005952.2	Mouse:Muc6|	Mucin
Matrisome-associated	ECM-affiliated Proteins	MUC7	mucin 7, secreted	DKFZp686J03256|FLJ27047|MG2|MGC34772	7518	7518	D6RHX1:Q8TAX7	NP_001138478.1:NP_001138479.1:NP_689504.2		Mucin
Matrisome-associated	ECM-affiliated Proteins	MUC8	mucin 8	-	7519	7519	M0R3A3	XP_005275787.1		Mucin
Matrisome-associated	ECM-affiliated Proteins	MUCL1	mucin-like 1	SBEM	30588	30588	F8VV13:Q96DR8	NP_477521.1	Mouse:Mucl1|	Mucin
Matrisome-associated	ECM-affiliated Proteins	OVGP1	oviductal glycoprotein 1, 120kDa	CHIT5|EGP|MUC9|OGP	8524	8524	B4DHP1:Q12889	NP_002548.3	Mouse:Ovgp1|
Matrisome-associated	ECM-affiliated Proteins	PARM1	prostate androgen-regulated mucin-like protein 1	Cipar1|DKFZP564O0823|PARM-1|WSC4	24536	24536	D6RBB6:Q6UWI2	NP_056208.2	Mouse:Parm1|
Matrisome-associated	ECM-affiliated Proteins	PLXDC1	plexin domain containing 1	DKFZp686F0937|FLJ36270|FLJ45632|TEM3|TEM7	20945	20945	B3KSI0:B4E173:C9JCL2:C9JWQ3:J3KS04:J3QR40:J3QRR7:Q8IUK5	NP_065138.2	Mouse:Plxdc1|
Matrisome-associated	ECM-affiliated Proteins	PLXDC2	plexin domain containing 2	FLJ14623|TEM7R	21013	21013	Q6UX71	NP_001269665.1:NP_116201.7	Mouse:Plxdc2|
Matrisome-associated	ECM-affiliated Proteins	PLXNA1	plexin A1	DKFZp761P19121|NOV|NOVP|PLEXIN-A1|PLXN1	9099	9099	F8VSZ4:Q9UIW2	NP_115618.3	Mouse:Plxna1|	Plexin
Matrisome-associated	ECM-affiliated Proteins	PLXNA2	plexin A2	FLJ11751|FLJ30634|KIAA0463|OCT|PLXN2	9100	9100	O75051	NP_079455.3	Mouse:Plxna2|	Plexin
Matrisome-associated	ECM-affiliated Proteins	PLXNA3	plexin A3	6.3|HSSEXGENE|PLEXIN-A3|PLXN3|PLXN4|SEX|XAP-6	9101	9101	P51805	NP_059984.3	Mouse:Plxna3|	Plexin
Matrisome-associated	ECM-affiliated Proteins	PLXNA4	plexin A4	DKFZp434G0625|DKFZp566O0546|FAYV2820|FLJ35026|FLJ3	9102	9102	Q9HCM2	NP_001099013.1:NP_065962.1:NP_861440.2:XP_005250743.1:XP_005250744.1:XP_006716234.1	Mouse:Plxna4|	Plexin
Matrisome-associated	ECM-affiliated Proteins	PLXNB1	plexin B1	KIAA0407|MGC149167|PLEXIN-B1|PLXN5|SEP	9103	9103	G8JLJ7:O43157	NP_001123554.1:NP_002664.2	Mouse:Plxnb1|	Plexin
Matrisome-associated	ECM-affiliated Proteins	PLXNB2	plexin B2	KIAA0315|MM1|Nbla00445|PLEXB2|dJ402G11.3	9104	9104	A6QRG9:A6QRH1:E2PU09:H0Y6J7:H0Y7X5:O15031	NP_036533.2:XP_005261966.1:XP_005261967.1:XP_005261968.1:XP_006724476.1	Mouse:Plxnb2|	Plexin
Matrisome-associated	ECM-affiliated Proteins	PLXNB3	plexin B3	FLJ76953|PLEXB3|PLEXR|PLXN6	9105	9105	B7Z3H9:F5GWC0:F5GZZ4:H7BZV5:H7C0P4:H7C3L0:Q9ULL4	NP_001156729.1:NP_005384.2	Mouse:Plxnb3|	Plexin
Matrisome-associated	ECM-affiliated Proteins	PLXNC1	plexin C1	CD232|PLXN-C1|VESPR	9106	9106	B4DHQ7:F5H3A2:F8VUW4:F8W095:F8W1K6:O60486	NP_005752.1	Mouse:Plxnc1|	Plexin
Matrisome-associated	ECM-affiliated Proteins	PLXND1	plexin D1	KIAA0620|MGC75353|PLEXD1	9107	9107	D6RH25:H0Y9D1:H0YA64:H0YAB2:H0YAM9:Q9Y4D7	NP_055918.2	Mouse:Plxnd1|	Plexin
Matrisome-associated	ECM-affiliated Proteins	PROL1	proline rich, lacrimal 1	BPLP|PRL1	17279	17279	Q99935	NP_067048.4	Mouse:Prol1|
Matrisome-associated	ECM-affiliated Proteins	REG1A	regenerating islet-derived 1 alpha	ICRF|MGC12447|P19|PSP|PSPS|PSPS1|PTP|REG	9951	9951	P05451	NP_002900.2	Mouse:Reg1|
Matrisome-associated	ECM-affiliated Proteins	REG1B	regenerating islet-derived 1 beta	PSPS2|REGH|REGI-BETA|REGL	9952	9952	H7BZ24:P48304	NP_006498.1	Mouse:Reg2|
Matrisome-associated	ECM-affiliated Proteins	REG3A	regenerating islet-derived 3 alpha	HIP|PAP|PAP-H|PAP1|PBCGF|REG-III|REG3	8601	8601	Q06141	NP_002571.1:NP_620354.1:NP_620355.1	Mouse:Reg3g|
Matrisome-associated	ECM-affiliated Proteins	REG3G	regenerating islet-derived 3 gamma	MGC118998|MGC118999|MGC119001|PAP1B|PAPIB|REG-III|	29595	29595	Q6UW15	NP_001008388.1:NP_001256969.1:NP_940850.1:XP_005264192.1	Mouse:Reg3b|
Matrisome-associated	ECM-affiliated Proteins	REG4	regenerating islet-derived family, member 4	GISP|REG-IV|RELP	22977	22977	E9PNV6:Q9BYZ8	NP_001152824.1:NP_001152825.1:NP_114433.1	Mouse:Reg4|
Matrisome-associated	ECM-affiliated Proteins	SDC1	syndecan 1	CD138|SDC|SYND1|syndecan	10658	10658	E9PHH3:F8WCX9:H7C1K4:P18827	NP_001006947.1:NP_002988.3	Mouse:Sdc1|	Syndecan
Matrisome-associated	ECM-affiliated Proteins	SDC2	syndecan 2	HSPG|HSPG1|SYND2	10659	10659	E5RHU3:E5RJB8:E7ESK6:E9PBI9:P34741	NP_002989.2:XP_005251077.1:XP_006716677.1	Mouse:Sdc2|	Syndecan
Matrisome-associated	ECM-affiliated Proteins	SDC3	syndecan 3	SDCN|SYND3	10660	10660	D3DPN2:O75056	NP_055469.3	Mouse:Sdc3|	Syndecan
Matrisome-associated	ECM-affiliated Proteins	SDC4	syndecan 4	MGC22217|SYND4	10661	10661	B4E1S6:P31431	NP_002990.2	Mouse:Sdc4|	Syndecan
Matrisome-associated	ECM-affiliated Proteins	SEMA3A	sema domain, immunoglobulin domain (Ig), short basic domain, secreted, (semaphorin) 3A	Hsema-I|Hsema-III|MGC133243|SEMA1|SEMAD|SEMAIII|SE	10723	10723	C9J9C4:C9JD25:Q14563	NP_006071.1:XP_005250167.1:XP_005250168.1:XP_006715901.1:XP_006715902.1	Mouse:Sema3a|	Semaphorin
Matrisome-associated	ECM-affiliated Proteins	SEMA3B	sema domain, immunoglobulin domain (Ig), short basic domain, secreted, (semaphorin) 3B	FLJ34863|LUCA-1|SEMA5|SEMAA|SemA|semaV	10724	10724	Q13214	NP_001005914.1:NP_001276989.1:NP_001276990.1:NP_001276991.1:NP_001276992.1:NP_004627.1	Mouse:Sema3b|	Semaphorin
Matrisome-associated	ECM-affiliated Proteins	SEMA3C	sema domain, immunoglobulin domain (Ig), short basic domain, secreted, (semaphorin) 3C	SEMAE|SemE	10725	10725	B4DRL8:F2Z2Y0:F5H1Z7:F8WEP9:Q99985	NP_006370.1	Mouse:Sema3c|	Semaphorin
Matrisome-associated	ECM-affiliated Proteins	SEMA3D	sema domain, immunoglobulin domain (Ig), short basic domain, secreted, (semaphorin) 3D	MGC39708|Sema-Z2|coll-2	10726	10726	C9JYT6:O95025	NP_689967.2	Mouse:Sema3d|	Semaphorin
Matrisome-associated	ECM-affiliated Proteins	SEMA3E	sema domain, immunoglobulin domain (Ig), short basic domain, secreted, (semaphorin) 3E	KIAA0331|M-SEMAH|M-SemaK|SEMAH|coll-5	10727	10727	C9JVH5:F8WCZ5:O15041	NP_001171600.1:NP_036563.1	Mouse:Sema3e|	Semaphorin
Matrisome-associated	ECM-affiliated Proteins	SEMA3F	sema domain, immunoglobulin domain (Ig), short basic domain, secreted, (semaphorin) 3F	SEMA-IV|SEMA4|SEMAK	10728	10728	C9IYS6:C9J1V2:C9J4H5:C9JPG5:H7C4A2:Q13275	NP_004177.3:XP_005265438.1:XP_005265439.1	Mouse:Sema3f|	Semaphorin
Matrisome-associated	ECM-affiliated Proteins	SEMA3G	sema domain, immunoglobulin domain (Ig), short basic domain, secreted, (semaphorin) 3G	FLJ00014|MGC119473|sem2	30400	30400	C9JXB2:H7C5M7:Q9NS98	NP_064548.1	Mouse:Sema3g|	Semaphorin
Matrisome-associated	ECM-affiliated Proteins	SEMA4A	sema domain, immunoglobulin domain (Ig), transmembrane domain (TM) and short cytoplasmic domain, (semaphorin) 4A	CORD10|FLJ12287|RP35|SEMAB|SEMB	10729	10729	Q5TCI4:Q5TCI6:Q5TCJ5:Q5TCJ7:Q9H3S1	NP_001180229.1:NP_001180230.1:NP_001180231.1:NP_071762.2	Mouse:Sema4a|	Semaphorin
Matrisome-associated	ECM-affiliated Proteins	SEMA4B	sema domain, immunoglobulin domain (Ig), transmembrane domain (TM) and short cytoplasmic domain, (semaphorin) 4B	KIAA1745|MGC131831|SEMAC|SemC	10730	10730	H0YKP2:H0YKV7:H0YLN3:H0YM68:H0YMD6:H0YMR1:H0YMZ3:H0YN49:H0YNC4:H0YNM2:J3KNP4:Q9NPR2	NP_064595.2:NP_945119.1	Mouse:Sema4b|	Semaphorin
Matrisome-associated	ECM-affiliated Proteins	SEMA4C	sema domain, immunoglobulin domain (Ig), transmembrane domain (TM) and short cytoplasmic domain, (semaphorin) 4C	FLJ20369|KIAA1739|M-SEMA-F|MGC126382|MGC126383|SEM	10731	10731	C9J4M7:C9JV89:Q9C0C4	NP_060259.4	Mouse:Sema4c|	Semaphorin
Matrisome-associated	ECM-affiliated Proteins	SEMA4D	sema domain, immunoglobulin domain (Ig), transmembrane domain (TM) and short cytoplasmic domain, (semaphorin) 4D	C9orf164|CD100|FLJ33485|FLJ34282|FLJ39737|FLJ46484	10732	10732	C9JD54:C9JFP1:C9JYS7:E9PFD9:F5H044:Q92854	NP_001135759.1:NP_006369.3:XP_005251711.1	Mouse:Sema4d|	Semaphorin
Matrisome-associated	ECM-affiliated Proteins	SEMA4F	sema domain, immunoglobulin domain (Ig), transmembrane domain (TM) and short cytoplasmic domain, (semaphorin) 4F	M-SEMA|PRO2353|SEMAM|SEMAW|m-Sema-M	10734	10734	B7Z931:C9JKW7:C9K0A1:F8WCP8:F8WD61:F8WEH3:O95754	NP_001258590.1:NP_001258591.1:NP_004254.2	Mouse:Sema4f|	Semaphorin
Matrisome-associated	ECM-affiliated Proteins	SEMA4G	sema domain, immunoglobulin domain (Ig), transmembrane domain (TM) and short cytoplasmic domain, (semaphorin) 4G	FLJ20590|KIAA1619|MGC102867	10735	10735	E5RFG2:E5RGX4:H0YBN3:Q9NTN9	NP_001190173.1:NP_060363.2:XP_005270065.1:XP_005270066.1:XP_005270067.1	Mouse:Sema4g|	Semaphorin
Matrisome-associated	ECM-affiliated Proteins	SEMA5A	sema domain, seven thrombospondin repeats (type 1 and type 1-like), transmembrane domain (TM) and short cytoplasmic domain, (semaphorin) 5A	FLJ12815|SEMAF|semF	10736	10736	D6R9K6:D6RAF4:H0Y9H9:Q13591	NP_003957.2:XP_006714569.1:XP_006714570.1	Mouse:Sema5a|	Semaphorin
Matrisome-associated	ECM-affiliated Proteins	SEMA5B	sema domain, seven thrombospondin repeats (type 1 and type 1-like), transmembrane domain (TM) and short cytoplasmic domain, (semaphorin) 5B	FLJ10372|KIAA1445|SEMAG|SemG	10737	10737	B5ME80:C9JKR3:C9JTV9:C9JTX2:F8WAT5:H0Y5U2:Q9P283	NP_001026872.2:NP_001243275.1:NP_001243276.1	Mouse:Sema5b|	Semaphorin
Matrisome-associated	ECM-affiliated Proteins	SEMA6A	sema domain, transmembrane domain (TM), and cytoplasmic domain, (semaphorin) 6A	HT018|KIAA1368|SEMA|SEMA6A1|SEMAQ|VIA	10738	10738	B3KU01:D6RAG9:D6RCR0:E7ERF3:E9PDV9:H0Y8V9:Q9H2E6	NP_065847.1	Mouse:Sema6a|	Semaphorin
Matrisome-associated	ECM-affiliated Proteins	SEMA6B	sema domain, transmembrane domain (TM), and cytoplasmic domain, (semaphorin) 6B	SEM-SEMA-Y|SEMA-VIB|SEMAN|semaZ	10739	10739	Q9H3T3	NP_115484.2	Mouse:Sema6b|	Semaphorin
Matrisome-associated	ECM-affiliated Proteins	SEMA6C	sema domain, transmembrane domain (TM), and cytoplasmic domain, (semaphorin) 6C	SEMAY|m-SemaY|m-SemaY2	10740	10740	Q9H3T2	NP_001171532.1:NP_001171533.1:NP_112175.2:XP_005244890.1:XP_005244892.1:XP_005244893.1	Mouse:Sema6c|	Semaphorin
Matrisome-associated	ECM-affiliated Proteins	SEMA6D	sema domain, transmembrane domain (TM), and cytoplasmic domain, (semaphorin) 6D	FLJ11598|KIAA1479	16770	16770	H0YL82:H0YM97:H0YMA6:H0YMP7:H0YMV0:Q8NFY4	NP_001185928.1:NP_065909.1:NP_079242.2:NP_705869.1:NP_705870.1:NP_705871.1:NP_705872.1:XP_005254744.1:XP_005254746.1:XP_005254747.1	Mouse:Sema6d|	Semaphorin
Matrisome-associated	ECM-affiliated Proteins	SEMA7A	semaphorin 7A, GPI membrane anchor (John Milton Hagen blood group)	CD108|CDw108|H-SEMA-K1|H-Sema-L|JMH|MGC126692|MGC1	10741	10741	F5GYX3:H3BMF9:O75326	NP_001139501.1:NP_001139502.1:NP_003603.1:NP_001139502.1	Mouse:Sema7a|	Semaphorin
Matrisome-associated	ECM-affiliated Proteins	SFTA2	surfactant associated 2	GSGL541|SFTPG|UNQ541	18386	18386	Q6UW10	NP_995326.1	Mouse:Sfta2|
Matrisome-associated	ECM-affiliated Proteins	SFTA3	surfactant associated 3	FLJ23494|SFTPH	18387	18387	E5RG42:G5EA12:P0C7M3	NP_001094811.1	Mouse:E030019B13Rik|
Matrisome-associated	ECM-affiliated Proteins	SFTPA1	surfactant protein A1	AC068139.6|COLEC4|FLJ50593|FLJ51913|FLJ61144|FLJ77	10798	10798	B4DNW5:J3KPA7:Q8IWL2	NP_001087239.2:NP_001158116.1:NP_001158119.1:NP_005402.3:XP_005270119.1:XP_006718016.1	Mouse:Sftpa1|
Matrisome-associated	ECM-affiliated Proteins	SFTPA2	surfactant protein A2	COLEC5|FLJ50594|FLJ50597|FLJ51953|FLJ79091|FLJ9367	10799	10799	Q8IWL1:R4GMN3:X6REF7	NP_001092138.1:XP_005270188.1:XP_005270189.1
Matrisome-associated	ECM-affiliated Proteins	SFTPB	surfactant protein B	PSP-B|SFTB3|SFTP3|SMDP1|SP-B	10801	10801	D6W5L6:H0Y7V6:P07988:U3KQT2	NP_000533.3:NP_942140.2:NP_000533.3:NP_942140.2:XP_005264544.1	Mouse:Sftpb|
Matrisome-associated	ECM-affiliated Proteins	SFTPC	surfactant protein C	PSP-C|SFTP2|SMDP2|SP-C	10802	10802	C9JYF6:E5RG20:E5RG93:E5RHW5:E5RI64:E5RI92:P11686	NP_001165828.1:NP_001165881.1:NP_003009.2	Mouse:Sftpc|
Matrisome-associated	ECM-affiliated Proteins	SFTPD	surfactant protein D	COLEC7|PSP-D|SFTP4|SP-D	10803	10803	P35247:Q5T0M2	NP_003010.4	Mouse:Sftpd|
Matrisome-associated	ECM Regulators	A2M	alpha-2-macroglobulin	CPAMD5|DKFZp779B086|FWP007|S863-7	7	7	F5H1E8:F8W7L3:H0YFH1:H0YGH6:P01023	NP_000005.2	Mouse:A2m|
Matrisome-associated	ECM Regulators	A2ML1	alpha-2-macroglobulin-like 1	CPAMD9|DKFZp686C1729|DKFZp686D2011|DKFZp686G1812|D	23336	23336	A8K2U0:F5GXP1:F5GYG7:F5H2Z2:H0YGG5:H0YH14	NP_653271.2
Matrisome-associated	ECM Regulators	ADAM10	ADAM metallopeptidase domain 10	AD10|CD156c|HsT18717|MADM|kuz	188	188	B4DU28:B5MC71:C9J9B4:H0YK32:H0YK87:H0YNC5:H3BS53:O14672	NP_001101.1	Mouse:Adam10|
Matrisome-associated	ECM Regulators	ADAM11	ADAM metallopeptidase domain 11	MDC	189	189	B4DKD2:H7BY08:K7EKA8:O75078	NP_002381.2	Mouse:Adam11|
Matrisome-associated	ECM Regulators	ADAM12	ADAM metallopeptidase domain 12	MCMP|MCMPMltna|MLTN|MLTNA	190	190	O43184:Q5JRP2	NP_001275903.1:NP_001275904.1:NP_003465.3:NP_067673.2	Mouse:Adam12|
Matrisome-associated	ECM Regulators	ADAM15	ADAM metallopeptidase domain 15	MDC15	193	193	A6NG98:Q13444	NP_001248393.1:NP_001248394.1:NP_003806.3:NP_997074.1:NP_997077.1:NP_997078.1:NP_997079.1:NP_997080.1	Mouse:Adam15|
Matrisome-associated	ECM Regulators	ADAM17	ADAM metallopeptidase domain 17	ADAM18|CD156B|CSVP|MGC71942|TACE	195	195	E7EUI5:P78536	NP_003174.3	Mouse:Adam17|
Matrisome-associated	ECM Regulators	ADAM18	ADAM metallopeptidase domain 18	ADAM27|MGC41836|MGC88272|tMDCIII	196	196	E5RIP0:E5RK96:Q0VAI3:Q9Y3Q7	NP_001177885.1:NP_055052.1	Mouse:Adam18|
Matrisome-associated	ECM Regulators	ADAM19	ADAM metallopeptidase domain 19 (meltrin beta)	FKSG34|MADDAM|MLTNB	197	197	E5RIS2:E7ENW4:E9PD32:H0YC66:Q9H013	NP_150377.1:XP_005266060.1	Mouse:Adam19|
Matrisome-associated	ECM Regulators	ADAM2	ADAM metallopeptidase domain 2	CRYN1|CRYN2|CT15|FTNB|PH-30b|PH30	198	198	B4DWY7:Q6P2G0:Q99965	NP_001265042.1:NP_001265043.1:NP_001455.3:NP_001265043.1	Mouse:Adam2|
Matrisome-associated	ECM Regulators	ADAM20	ADAM metallopeptidase domain 20	-	199	199	O43506	NP_003805.3:XP_005268208.1:XP_005268209.1
Matrisome-associated	ECM Regulators	ADAM21	ADAM metallopeptidase domain 21	ADAM31|MGC125389	200	200	Q9UKJ8	NP_003804.2	Mouse:Adam21|
Matrisome-associated	ECM Regulators	ADAM22	ADAM metallopeptidase domain 22	MDC2|MGC149832	201	201	E7EPF1:E9PF78:F8WAD8:G5E951:H7C0Q9:H7C3I4:Q9P0K1	NP_004185.1:NP_068367.1:NP_068368.2:NP_068369.1	Mouse:Adam22|
Matrisome-associated	ECM Regulators	ADAM23	ADAM metallopeptidase domain 23	MDC3	202	202	E7EWD3:H7C2M6:O75077	NP_003803.1:XP_005246989.1	Mouse:Adam23|
Matrisome-associated	ECM Regulators	ADAM28	ADAM metallopeptidase domain 28	ADAM23|MDC-Lm|MDC-Ls|MDCL|eMDCII	206	206	B4DDY3:E5RGY1:E5RJQ1:E7EMU1:H0YBG8:H0YBQ8:Q9UKQ2	NP_055080.2:NP_068547.2	Mouse:Adam28|
Matrisome-associated	ECM Regulators	ADAM29	ADAM metallopeptidase domain 29	CT73|svph1	207	207	D6RBU0:D6RHU0:D6RIU9:Q9UKF5	NP_001124175.1:NP_001124176.1:NP_001124177.1:NP_001265054.1:NP_001265055.1:NP_001265056.1:NP_055084.3:XP_005262761.1:XP_005262762.1	Mouse:Adam29|
Matrisome-associated	ECM Regulators	ADAM30	ADAM metallopeptidase domain 30	svph4	208	208	Q9UKF2	NP_068566.2	Mouse:Adam30|
Matrisome-associated	ECM Regulators	ADAM32	ADAM metallopeptidase domain 32	FLJ26299|FLJ29004	15479	15479	E3W988:E5RGK7:E5RJE6:E5RJY7:E7EPX8:E7ER82:Q8TC27	NP_659441.3	Mouse:Adam32|
Matrisome-associated	ECM Regulators	ADAM33	ADAM metallopeptidase domain 33	C20orf153|DJ964F7.1|DKFZp434K0521|FLJ35308|FLJ3675	15478	15478	A2A2L3:Q9BZ11	NP_001269376.1:NP_001269376.1:NP_079496.1:NP_694882.1	Mouse:Adam33|
Matrisome-associated	ECM Regulators	ADAM7	ADAM metallopeptidase domain 7	EAPI|GP-83	214	214	C9JK28:E5RK87:Q6PEJ6:Q9H2U9	NP_003808.2:XP_005273727.1	Mouse:Adam7|
Matrisome-associated	ECM Regulators	ADAM8	ADAM metallopeptidase domain 8	CD156|MGC134985|MS2	215	215	H0YKZ1:H0YMT6:P78325	NP_001100.3:NP_001157961.1:NP_001157962.1	Mouse:Adam8|
Matrisome-associated	ECM Regulators	ADAM9	ADAM metallopeptidase domain 9 (meltrin gamma)	CORD9|KIAA0021|MCMP|MDC9|Mltng	216	216	A0AVL1:C9J6H5:C9JPM3:F8WC54:Q13443	NP_003807.1	Mouse:Adam9|
Matrisome-associated	ECM Regulators	ADAMDEC1	ADAM-like, decysin 1	FLJ79219|M12.219	16299	16299	E5RK05:O15204	NP_001138743.1:NP_001138744.1:NP_055294.1	Mouse:Adamdec1|
Matrisome-associated	ECM Regulators	ADAMTS1	ADAM metallopeptidase with thrombospondin type 1 motif, 1	C3-C5|KIAA1346|METH1	217	217	E5RI60:E5RJR7:H7C206:Q9UHI8	NP_008919.3	Mouse:Adamts1|
Matrisome-associated	ECM Regulators	ADAMTS10	ADAM metallopeptidase with thrombospondin type 1 motif, 10	ADAM-TS10|WMS	13201	13201	M0QY12:M0QY36:Q9H324	NP_001269281.1:NP_112219.3	Mouse:Adamts10|
Matrisome-associated	ECM Regulators	ADAMTS12	ADAM metallopeptidase with thrombospondin type 1 motif, 12	PRO4389	14605	14605	D6REX0:P58397	NP_112217.2	Mouse:Adamts12|
Matrisome-associated	ECM Regulators	ADAMTS13	ADAM metallopeptidase with thrombospondin type 1 motif, 13	C9orf8|DKFZp434C2322|FLJ42993|MGC118899|MGC118900|	1366	1366	E7EV88:Q76LX8:Q9UGQ1	NP_620594.1:NP_620595.1:NP_620596.2	Mouse:Adamts13|
Matrisome-associated	ECM Regulators	ADAMTS14	ADAM metallopeptidase with thrombospondin type 1 motif, 14	FLJ32820	14899	14899	Q8WXS8	NP_542453.2:NP_631894.2	Mouse:Adamts14|
Matrisome-associated	ECM Regulators	ADAMTS15	ADAM metallopeptidase with thrombospondin type 1 motif, 15	MGC126403	16305	16305	Q8TE58	NP_620686.1	Mouse:Adamts15|
Matrisome-associated	ECM Regulators	ADAMTS16	ADAM metallopeptidase with thrombospondin type 1 motif, 16	ADAMTS16s|FLJ16731	17108	17108	Q2XQZ0:Q8TE57	NP_620687.2	Mouse:Adamts16|
Matrisome-associated	ECM Regulators	ADAMTS17	ADAM metallopeptidase with thrombospondin type 1 motif, 17	FLJ16363|FLJ32769	17109	17109	H0YMH1:H3BRA9:H3BV94:Q8TE56	NP_620688.2	Mouse:Adamts17|
Matrisome-associated	ECM Regulators	ADAMTS18	ADAM metallopeptidase with thrombospondin type 1 motif, 18	ADAMTS21	17110	17110	B4DEX3:H3BMG1:H3BTZ3:Q8TE60	NP_955387.1	Mouse:Adamts18|
Matrisome-associated	ECM Regulators	ADAMTS19	ADAM metallopeptidase with thrombospondin type 1 motif, 19	FLJ16042	17111	17111	D6R9M2:H0Y8Y0:Q8TE59	NP_598377.3	Mouse:Adamts19|
Matrisome-associated	ECM Regulators	ADAMTS2	ADAM metallopeptidase with thrombospondin type 1 motif, 2	ADAM-TS2|ADAMTS-3|NPI|PCINP|PCPNI|hPCPNI	218	218	O95450	NP_055059.2:NP_067610.1	Mouse:Adamts2|
Matrisome-associated	ECM Regulators	ADAMTS20	ADAM metallopeptidase with thrombospondin type 1 motif, 20	GON-1	17178	17178	E9PBD5:G3V1X8:H0YHN3:P59510	NP_079279.3	Mouse:Adamts20|
Matrisome-associated	ECM Regulators	ADAMTS3	ADAM metallopeptidase with thrombospondin type 1 motif, 3	ADAMTS-4|KIAA0366	219	219	O15072	NP_055058.2	Mouse:Adamts3|
Matrisome-associated	ECM Regulators	ADAMTS4	ADAM metallopeptidase with thrombospondin type 1 motif, 4	ADAMTS-2|ADAMTS-4|ADMP-1|KIAA0688	220	220	O75173:Q5VTW1	NP_005090.3	Mouse:Adamts4|
Matrisome-associated	ECM Regulators	ADAMTS5	ADAM metallopeptidase with thrombospondin type 1 motif, 5	ADAMTS11|ADMP-2|FLJ36738	221	221	Q9UNA0	NP_008969.2	Mouse:Adamts5|
Matrisome-associated	ECM Regulators	ADAMTS6	ADAM metallopeptidase with thrombospondin type 1 motif, 6	ADAM-TS6	222	222	D6R9L6:Q9UKP5	NP_922932.2	Mouse:Adamts6|
Matrisome-associated	ECM Regulators	ADAMTS7	ADAM metallopeptidase with thrombospondin type 1 motif, 7	ADAM-TS7|DKFZp434H204	223	223	Q9UKP4	NP_055087.2	Mouse:Adamts7|
Matrisome-associated	ECM Regulators	ADAMTS8	ADAM metallopeptidase with thrombospondin type 1 motif, 8	ADAM-TS8|FLJ41712|METH2	224	224	Q9UP79	NP_008968.4:XP_006718821.1	Mouse:Adamts8|
Matrisome-associated	ECM Regulators	ADAMTS9	ADAM metallopeptidase with thrombospondin type 1 motif, 9	FLJ42955|KIAA1312	13202	13202	C9JWI2:H0Y859:Q9P2N4	NP_891550.1:XP_005265386.1	Mouse:Adamts9|
Matrisome-associated	ECM Regulators	ADAMTSL1	ADAMTS-like 1	ADAMTSR1|C9orf94|DKFZp686L03130|FLJ35283|FLJ41032|	14632	14632	A2A343:A6NIB9:F8WEP3:H7BYE3:Q8N6G6	NP_001035362.3:NP_443098.3	Mouse:Adamtsl1|
Matrisome-associated	ECM Regulators	ADAMTSL2	ADAMTS-like 2	FLJ45164|KIAA0605	14631	14631	B1B0D4:Q86TH1	NP_001138792.1:NP_055509.2:XP_005272296.1:XP_006717400.1:XP_005272294.1	Mouse:Adamtsl2|
Matrisome-associated	ECM Regulators	ADAMTSL3	ADAMTS-like 3	KIAA1233|MGC150716|MGC150717	14633	14633	P82987	NP_997400.2:XP_005272492.1	Mouse:Adamtsl3|
Matrisome-associated	ECM Regulators	ADAMTSL4	ADAMTS-like 4	TSRC1	19706	19706	F8WAD0:Q6UY14	NP_001275536.1:NP_001275537.1:NP_061905.2:NP_079284.2:NP_001275537.1	Mouse:Adamtsl4|
Matrisome-associated	ECM Regulators	ADAMTSL5	ADAMTS-like 5	THSD6	27912	27912	K7EJ85:K7ELN4:K7ELV0:Q0VD77:Q6ZMM2:X6R4H8	NP_998769.2:NP_998769.2:XP_005259606.1	Mouse:Adamtsl5|
Matrisome-associated	ECM Regulators	AGT	angiotensinogen (serpin peptidase inhibitor, clade A, member 8)	ANHU|FLJ92595|FLJ97926|SERPINA8	333	333	P01019	NP_000020.1	Mouse:Agt|
Matrisome-associated	ECM Regulators	AMBP	alpha-1-microglobulin/bikunin precursor	A1M|EDC1|HCP|HI30|IATIL|ITI|ITIL|ITILC|UTI	453	453	P02760:S4R3Y4:S4R471	NP_001624.1	Mouse:Ambp|
Matrisome-associated	ECM Regulators	ASTL	astacin-like metallo-endopeptidase (M12 family)	MGC129843	31704	31704	Q6HA08	NP_001002036.3	Mouse:Astl|
Matrisome-associated	ECM Regulators	BMP1	bone morphogenetic protein 1	FLJ44432|PCOLC|PCP|PCP2|TLD	1067	1067	B7ZKR5:E5RH22:P13497:Q3MIM8	NP_001190.1:NP_006120.1	Mouse:Bmp1|
Matrisome-associated	ECM Regulators	C17orf58	chromosome 17 open reading frame 58	MGC138278	27568	27568	Q2M2W7	NP_858041.2:NP_858042.2
Matrisome-associated	ECM Regulators	CD109	CD109 molecule	CPAMD7|DKFZp762L1111|FLJ38569|FLJ41966|RP11-525G3.	21685	21685	Q6YHK3	NP_001153059.1:NP_001153060.1:NP_598000.2:XP_005248716.1	Mouse:Cd109|
Matrisome-associated	ECM Regulators	CELA1	chymotrypsin-like elastase family, member 1	ELA1	3308	3308	Q9UNI1	NP_001962.3	Mouse:Cela1|
Matrisome-associated	ECM Regulators	CELA2A	chymotrypsin-like elastase family, member 2A	ELA2A|PE-1	24609	24609	P08217	NP_254275.1	Mouse:Cela2a|
Matrisome-associated	ECM Regulators	CELA2B	chymotrypsin-like elastase family, member 2B	ELA2B|MGC142100|MGC142102|MGC97052	29995	29995	P08218:Q5JRU4	NP_056933.2	Mouse:Cela2a|
Matrisome-associated	ECM Regulators	CELA3A	chymotrypsin-like elastase family, member 3A	ELA3|ELA3A	15944	15944	B1AQ52:B1AQ54:B1AQ55:P09093	NP_005738.4	Mouse:Cela3b|Mouse:Gm13011|
Matrisome-associated	ECM Regulators	CELA3B	chymotrypsin-like elastase family, member 3B	CBPP|E1|EL-1|ELA3B	15945	15945	P08861	NP_031378.1	Mouse:Cela3b|Mouse:Gm13011|
Matrisome-associated	ECM Regulators	CPAMD8	C3 and PZP-like, alpha-2-macroglobulin domain containing 8	FLJ42058|FLJ90618|K-CAP|KIAA1283|VIP	23228	23228	F8W7D1:M0QXH3:M0R0Z5:M0R3G7:Q8IZJ3	NP_056507.2	Mouse:Mug2|
Matrisome-associated	ECM Regulators	CPN2	carboxypeptidase N, polypeptide 2	ACBP	2313	2313	P22792	XP_005269337.1	Mouse:Cpn2|
Matrisome-associated	ECM Regulators	CST1	cystatin SN	-	2473	2473	P01037	NP_001889.2		Cystatin
Matrisome-associated	ECM Regulators	CST11	cystatin 11	CST8L|SC13|dJ322G13.6	15959	15959	Q9H112	NP_543020.2:NP_570612.1	Mouse:Cst11|	Cystatin
Matrisome-associated	ECM Regulators	CST2	cystatin SA	MGC71924	2474	2474	P09228	NP_001313.1		Cystatin
Matrisome-associated	ECM Regulators	CST3	cystatin C	ARMD11|MGC117328	2475	2475	P01034	NP_000090.1:NP_001275543.1	Mouse:Cst3|	Cystatin
Matrisome-associated	ECM Regulators	CST4	cystatin S	MGC71923	2476	2476	P01036	NP_001890.1		Cystatin
Matrisome-associated	ECM Regulators	CST5	cystatin D	MGC71922	2477	2477	P28325	NP_001891.2		Cystatin
Matrisome-associated	ECM Regulators	CST6	cystatin E/M	-	2478	2478	Q15828	NP_001314.1	Mouse:Cst6|	Cystatin
Matrisome-associated	ECM Regulators	CST7	cystatin F (leukocystatin)	CMAP	2479	2479	O76096	NP_003641.3	Mouse:Cst7|	Cystatin
Matrisome-associated	ECM Regulators	CST8	cystatin 8 (cystatin-related epididymal specific)	CRES	2480	2480	A2A2N0:O60676	NP_001268659.1:NP_005483.1:XP_005260696.1	Mouse:Cst8|	Cystatin
Matrisome-associated	ECM Regulators	CST9	cystatin 9 (testatin)	CLM	13261	13261	Q5W186	NP_001008693.2	Mouse:Cst9|	Cystatin
Matrisome-associated	ECM Regulators	CST9L	cystatin 9-like	FLJ92394|bA218C14.1	16233	16233	Q9H4G1	NP_542177.1	Mouse:Cst9|	Cystatin
Matrisome-associated	ECM Regulators	CSTA	cystatin A (stefin A)	STF1|STFA	2481	2481	C9J0E4:P01040	NP_005204.1	Mouse:2010005H15Rik|Mouse:BC100530|Mouse:BC117090|Mouse:Csta1|Mouse:Gm4758|Mouse:Gm5416|Mouse:Gm5483|Mouse:Stfa1|Mouse:Stfa2|Mouse:Stfa2l1|Mouse:Stfa3|	Cystatin
Matrisome-associated	ECM Regulators	CSTB	cystatin B (stefin B)	CST6|EPM1|PME|STFB	2482	2482	P04080	NP_000091.1	Mouse:Cstb|	Cystatin
Matrisome-associated	ECM Regulators	CSTL1	cystatin-like 1	RCET11|dJ322G13.4	15958	15958	Q9H114	NP_612140.1	Mouse:Cstl1|	Cystatin
Matrisome-associated	ECM Regulators	CTSA	cathepsin A	GLB2|GSL|NGBE|PPCA|PPGB	9251	9251	P10619:Q5JZG9:Q5JZH0:U3KQ41:U3KQF1:U3KQU6:X6R5C5:X6R8A1	NP_000299.2:NP_000299.2:NP_001121167.1:NP_001161066.1:NP_001161066.1	Mouse:Ctsa|	Cathepsin
Matrisome-associated	ECM Regulators	CTSB	cathepsin B	APPS|CPSB	2527	2527	E9PCB3:E9PHZ5:E9PID0:E9PIS1:E9PJ67:E9PKQ7:E9PKX0:E9PL32:E9PLY3:E9PNL5:E9PQM1:E9PR00:E9PR54:E9PS78:E9PSG5:P07858:R4GMQ5	NP_001899.1:NP_680090.1:NP_680091.1:NP_680092.1:NP_680093.1:XP_006716307.1:XP_006716308.1	Mouse:Ctsb|	Cathepsin
Matrisome-associated	ECM Regulators	CTSC	cathepsin C	CPPI|DPP1|DPPI|HMS|JP|JPD|PALS|PLS	2528	2528	H0YCY8:H0YDA2:P53634	NP_001107645.1:NP_001805.3:NP_680475.1	Mouse:Ctsc|	Cathepsin
Matrisome-associated	ECM Regulators	CTSD	cathepsin D	CLN10|CPSD|MGC2311	2529	2529	C9JH19:F8W787:F8WD96:H7C1V0:P07339	NP_001900.1	Mouse:Ctsd|	Cathepsin
Matrisome-associated	ECM Regulators	CTSE	cathepsin E	CATE	2530	2530	B4DNU8:J3KP48:P14091	NP_001901.1:NP_683865.1	Mouse:Ctse|	Cathepsin
Matrisome-associated	ECM Regulators	CTSF	cathepsin F	CATSF	2531	2531	E9PSC2:H0YD65:H0YE42:Q9UBX1	NP_003784.2	Mouse:Ctsf|	Cathepsin
Matrisome-associated	ECM Regulators	CTSG	cathepsin G	CG|MGC23078	2532	2532	P08311	NP_001902.1	Mouse:Ctsg|	Cathepsin
Matrisome-associated	ECM Regulators	CTSH	cathepsin H	ACC-4|ACC-5|CPSB|DKFZp686B24257|MGC1519|minichain	2535	2535	E9PKT6:E9PN60:E9PN84:P09668	NP_004381.2	Mouse:Ctsh|	Cathepsin
Matrisome-associated	ECM Regulators	CTSK	cathepsin K	CTS02|CTSO|CTSO1|CTSO2|MGC23107|PKND|PYCD	2536	2536	P43235:Q5QP40	NP_000387.1	Mouse:Ctsk|	Cathepsin
Matrisome-associated	ECM Regulators	CTSL	cathepsin L1	CATL|CTSL|FLJ31037|MEP|CTSL1	2537	2537	P07711:Q5T8F0	NP_001244900.1:NP_001244901.1:NP_001903.1:NP_666023.1:XP_005251773.1		Cathepsin
Matrisome-associated	ECM Regulators	CTSO	cathepsin O	CTSO1	2542	2542	P43234	NP_001325.1	Mouse:Ctso|	Cathepsin
Matrisome-associated	ECM Regulators	CTSS	cathepsin S	MGC3886	2545	2545	P25774:U3KPS4:U3KQE7	NP_001186668.1:NP_004070.3	Mouse:Ctss|	Cathepsin
Matrisome-associated	ECM Regulators	CTSV	cathepsin L2	CATL2|CTSU|CTSV|MGC125957|CTSL2	2538	2538	O60911	NP_001188504.1:NP_001324.2:XP_006717023.1	Mouse:Ctsl|	Cathepsin
Matrisome-associated	ECM Regulators	CTSW	cathepsin W	LYPN	2546	2546	E9PI30:H0YDT2:P56202	NP_001326.2	Mouse:Ctsw|	Cathepsin
Matrisome-associated	ECM Regulators	CTSZ	cathepsin Z	CTSX|FLJ17088	2547	2547	Q9UBR2	NP_001327.2	Mouse:Ctsz|	Cathepsin
Matrisome-associated	ECM Regulators	EGLN1	egl nine homolog 1 (C. elegans)	C1orf12|DKFZp761F179|ECYT3|HIFPH2|HPH2|PHD2|SM20|Z	1232	1232	Q9GZT9	NP_071334.1	Mouse:Egln1|
Matrisome-associated	ECM Regulators	EGLN2	egl nine homolog 2 (C. elegans)	DKFZp434E026|EIT6|HIFPH1|HPH-3|PHD1	14660	14660	M0QXM8:M0QXR0:M0R035:M0R0Z6:M0R110:M0R1A3:M0R1L0:M0R1W4:M0R2X9:M0R350:Q96KS0	NP_444274.1:NP_542770.2	Mouse:Egln2|
Matrisome-associated	ECM Regulators	EGLN3	egl nine homolog 3 (C. elegans)	FLJ21620|HIFPH3|MGC125998|MGC125999|PHD3	14661	14661	F8VR39:F8W1G2:G3V3M1:Q9H6Z9	NP_071356.1:XP_006720078.1	Mouse:Egln3|
Matrisome-associated	ECM Regulators	ELANE	elastase, neutrophil expressed	ELA2|GE|HLE|HNE|NE|PMN-E|SCN1	3309	3309	P08246	NP_001963.1:XP_005259574.1:XP_006725460.1	Mouse:Elane|
Matrisome-associated	ECM Regulators	F10	coagulation factor X	FX|FXA	3528	3528	B7ZBK1:F8WBM7:P00742:Q5JVE8	NP_000495.1:XP_005268355.1	Mouse:F10|
Matrisome-associated	ECM Regulators	F12	coagulation factor XII (Hageman factor)	HAE3|HAEX|HAF	3530	3530	P00748	NP_000496.2	Mouse:F12|
Matrisome-associated	ECM Regulators	F13A1	coagulation factor XIII, A1 polypeptide	F13A	3531	3531	A6PVK5:H0Y4W5:H0Y796:P00488:Q9NQP5	NP_000120.2:XP_006715073.1	Mouse:F13a1|
Matrisome-associated	ECM Regulators	F13B	coagulation factor XIII, B polypeptide	FXIIIB	3534	3534	P05160	NP_001985.2	Mouse:F13b|
Matrisome-associated	ECM Regulators	F2	coagulation factor II (thrombin)	PT	3535	3535	C9JV37:E9PIT3:P00734	NP_000497.1	Mouse:F2|
Matrisome-associated	ECM Regulators	F7	coagulation factor VII (serum prothrombin conversion accelerator)	-	3544	3544	E9PH36:F5H8B0:P08709	NP_000122.1:NP_062562.1	Mouse:F7|
Matrisome-associated	ECM Regulators	F9	coagulation factor IX	FIX|HEMB|MGC129641|MGC129642|PTC	3551	3551	P00740	NP_000124.1	Mouse:F9|
Matrisome-associated	ECM Regulators	FAM20A	family with sequence similarity 20, member A	DKFZp434F2322	23015	23015	K7EIV7:K7EQL5:Q96MK3	NP_001230675.1:NP_060035.2	Mouse:Fam20a|
Matrisome-associated	ECM Regulators	FAM20B	family with sequence similarity 20, member B	"glycosaminoglycan xylosylkinase", GXK1, KIAA0475	23017	23017	O75063:X6RH03	NP_055679.1	Mouse:Fam20b|
Matrisome-associated	ECM Regulators	FAM20C	family with sequence similarity 20, member C	"dentin matrix protein 4", DKFZp547D065, DMP4, IMAGE:4942737	22140	22140	Q8IXL6	NP_064608.2:XP_005249871.1	Mouse:Fam20c|
Matrisome-associated	ECM Regulators	HABP2	hyaluronan binding protein 2	FSAP|HABP|HGFAL|PHBP	4798	4798	B7Z8Q5:F5H475:Q14520	NP_001171131.1:NP_004123.1	Mouse:Habp2|
Matrisome-associated	ECM Regulators	HMSD	histocompatibility (minor) serpin domain containing	ACC-6|C18orf53|HSMD-v	23037	23037	A8MTL9:P0C7T4	NP_001116838.1
Matrisome-associated	ECM Regulators	HPSE	heparanase	HPA|HPR1|HPSE1|HSE1	5164	5164	D6RAQ1:D6RHG4:Q9Y251	NP_001092010.1:NP_001159970.1:NP_001186759.1:NP_006656.2	Mouse:Hpse|
Matrisome-associated	ECM Regulators	HPSE2	heparanase 2	FLJ11684|FLJ44022|HPA2|HPR2|MGC133234	18374	18374	Q8WWQ2	NP_001159716.1:NP_001159717.1:NP_001159718.1:NP_068600.4	Mouse:Hpse2|
Matrisome-associated	ECM Regulators	HRG	histidine-rich glycoprotein	DKFZp779H1622|HPRG|HRGP	5181	5181	P04196	NP_000403.1	Mouse:Hrg|
Matrisome-associated	ECM Regulators	HTRA1	HtrA serine peptidase 1	ARMD7|HtrA|L56|ORF480|PRSS11	9476	9476	H0Y7G9:Q92743	NP_002766.1	Mouse:Htra1|
Matrisome-associated	ECM Regulators	HTRA3	HtrA serine peptidase 3	Prsp|Tasp	30406	30406	P83110	NP_444272.1:XP_005248097.1	Mouse:Htra3|
Matrisome-associated	ECM Regulators	HTRA4	HtrA serine peptidase 4	FLJ90724	26909	26909	P83105	NP_710159.1	Mouse:Htra4|
Matrisome-associated	ECM Regulators	HYAL1	hyaluronoglucosaminidase 1	HYAL-1|LUCA1|MGC45987|NAT6	5320	5320	C9JB49:C9JRK1:Q12794	NP_149349.2:NP_695013.1:NP_695014.1:NP_695015.1:NP_695017.1	Mouse:Hyal1|
Matrisome-associated	ECM Regulators	HYAL2	hyaluronoglucosaminidase 2	LUCA2	5321	5321	C9J700:C9JBF5:C9JSD1:C9JSI7:C9K016:Q12891	NP_003764.3:NP_149348.2:XP_005265581.1:XP_005265582.1	Mouse:Hyal2|
Matrisome-associated	ECM Regulators	HYAL3	hyaluronoglucosaminidase 3	LUCA-3|LUCA14|LUCA3|Minna14	5322	5322	C9JB51:O43820	NP_001186958.1:NP_001186959.1:NP_001186960.1:NP_001186961.1:NP_003540.2	Mouse:Hyal3|
Matrisome-associated	ECM Regulators	HYAL4	hyaluronoglucosaminidase 4	CSHY	5323	5323	C9J6F9:C9JU18:F8WDH9:Q2M3T9	NP_036401.2:XP_005250295.1	Mouse:Hyal4|
Matrisome-associated	ECM Regulators	ITIH1	inter-alpha (globulin) inhibitor H1	H1P|IATIH|IGHEP1|ITIH|MGC126415|SHAP	6166	6166	B5MCP1:F5H7E1:F8WAS2:H7C0N0:H7C5I0:P19827	NP_001159906.1:NP_001159907.1:NP_002206.2	Mouse:Itih1|
Matrisome-associated	ECM Regulators	ITIH2	inter-alpha (globulin) inhibitor H2	H2P|SHAP	6167	6167	P19823:Q5T985:Q5T987	NP_002207.2	Mouse:Itih2|
Matrisome-associated	ECM Regulators	ITIH3	inter-alpha (globulin) inhibitor H3	H3P	6168	6168	E7ET33:Q06033	NP_002208.3	Mouse:Itih3|
Matrisome-associated	ECM Regulators	ITIH4	inter-alpha (globulin) inhibitor H4 (plasma Kallikrein-sensitive glycoprotein)	DKFZp686G21125|H4P|IHRP|ITIHL1|PK120	6169	6169	B7ZKJ8:F5GXQ1:H7C0L5:Q14624	NP_001159921.1:NP_002209.2	Mouse:Itih4|
Matrisome-associated	ECM Regulators	ITIH5	inter-alpha (globulin) inhibitor H5	DKFZp686F0145|MGC10848|pp14776	21449	21449	C9J2H1:G5E9D8:H7C5A6:J3KQ60:Q86UX2	NP_001001851.1:NP_001001851.1:NP_085046.5	Mouse:Itih5|
Matrisome-associated	ECM Regulators	ITIH6	inter-alpha (globulin) inhibitor H5-like	UNQ6369|dJ14O9.1|ITIH5L	28907	28907	Q6UXX5	NP_940912.1	Mouse:Itih5l-ps|
Matrisome-associated	ECM Regulators	KAZALD1	Kazal-type serine peptidase inhibitor domain 1	BONO1|FKSG28|FKSG40|FLJ24094|IGFBP-rP10	25460	25460	Q96I82	NP_112191.2:XP_005270250.1	Mouse:Kazald1|
Matrisome-associated	ECM Regulators	KNG1	kininogen 1	BDK|KNG	6383	6383	P01042	NP_000884.1:NP_001095886.1:NP_001159923.1	Mouse:Kng1|Mouse:Kng2|
Matrisome-associated	ECM Regulators	KY	kyphoscoliosis peptidase	FLJ33207	26576	26576	B4DGA7:Q8NBH2	NP_848649.3	Mouse:Ky|
Matrisome-associated	ECM Regulators	LEPRE1	leucine proline-enriched proteoglycan (leprecan) 1	GROS1|MGC117314|OI8|P3H1	19316	19316	E2QRI1:H7C0D1:H7C2W6:Q32P28	NP_001139761.1:NP_001230175.1:NP_071751.3	Mouse:Lepre1|
Matrisome-associated	ECM Regulators	LEPREL1	leprecan-like 1	FLJ10718|MLAT4|P3H2	19317	19317	C9J313:C9JSL4:Q8IVL5	NP_001127890.1:NP_060662.2	Mouse:Leprel1|
Matrisome-associated	ECM Regulators	LEPREL2	leprecan-like 2	GRCB|HSU47926|P3H3	19318	19318	G8JLI6:Q8IVL6	NP_055077.2	Mouse:Leprel2|
Matrisome-associated	ECM Regulators	LOX	lysyl oxidase	MGC105112	6664	6664	H0YAL3:P28300	NP_002308.2	Mouse:Lox|
Matrisome-associated	ECM Regulators	LOXL1	lysyl oxidase-like 1	LOL|LOXL	6665	6665	H3BUV8:Q08397	NP_005567.2	Mouse:Loxl1|
Matrisome-associated	ECM Regulators	LOXL2	lysyl oxidase-like 2	LOR2|WS9-14	6666	6666	E5RFE2:E5RFY0:E5RHH3:E5RI22:E5RJL2:H0YAP6:H0YAR1:Q9Y4K0:R4GMS2	NP_002309.1	Mouse:Loxl2|
Matrisome-associated	ECM Regulators	LOXL3	lysyl oxidase-like 3	LOXL	13869	13869	B8ZZT6:B9A025:C9J5M1:E7END4:H7C248:P58215	NP_001276093.1:NP_001276094.1:NP_115992.1	Mouse:Loxl3|
Matrisome-associated	ECM Regulators	LOXL4	lysyl oxidase-like 4	FLJ21889|LOXC	17171	17171	Q96JB6	NP_115587.6	Mouse:Loxl4|
Matrisome-associated	ECM Regulators	LPA	lipoprotein, Lp(a)	AK38|APOA|LP	6667	6667	P08519	NP_005568.2
Matrisome-associated	ECM Regulators	MASP1	mannan-binding lectin serine peptidase 1 (C4/C2 activating component of Ra-reactive factor)	CRARF|CRARF1|DKFZp686I01199|FLJ26383|MASP|MGC12628	6901	6901	C9J1C7:C9JLU5:C9JMA2:F8W876:P48740	NP_001027019.1:NP_001870.3:NP_624302.1:XP_006713764.1	Mouse:Masp1|
Matrisome-associated	ECM Regulators	MASP2	mannan-binding lectin serine peptidase 2	MAP19|MASP-2|MASP1P1|sMAP	6902	6902	O00187	NP_006601.2:NP_631947.1	Mouse:Masp2|
Matrisome-associated	ECM Regulators	MEP1A	meprin A, alpha (PABA peptide hydrolase)	PPHA	7015	7015	Q16819	NP_005579.2	Mouse:Mep1a|
Matrisome-associated	ECM Regulators	MEP1B	meprin A, beta	-	7020	7020	J3KRK1:J3QKX5:Q16820	NP_005916.2:XP_005258332.1	Mouse:Mep1b|
Matrisome-associated	ECM Regulators	MMP1	matrix metallopeptidase 1 (interstitial collagenase)	CLG|CLGN	7155	7155	P03956	NP_002412.1	Mouse:Mmp1a|Mouse:Mmp1b|
Matrisome-associated	ECM Regulators	MMP10	matrix metallopeptidase 10 (stromelysin 2)	SL-2|STMY2	7156	7156	F5GYX7:P09238	NP_002416.1	Mouse:Mmp10|
Matrisome-associated	ECM Regulators	MMP11	matrix metallopeptidase 11 (stromelysin 3)	SL-3|ST3|STMY3	7157	7157	E9PED7:F8WDI7:H7C3I7:P24347	NP_005931.2	Mouse:Mmp11|
Matrisome-associated	ECM Regulators	MMP12	matrix metallopeptidase 12 (macrophage elastase)	HME|MGC138506|MME	7158	7158	P39900	NP_002417.2	Mouse:Mmp12|
Matrisome-associated	ECM Regulators	MMP13	matrix metallopeptidase 13 (collagenase 3)	CLG3|MANDP1	7159	7159	G5E971:P45452	NP_002418.1	Mouse:Mmp13|
Matrisome-associated	ECM Regulators	MMP14	matrix metallopeptidase 14 (membrane-inserted)	MMP-X1|MT1-MMP|MTMMP1	7160	7160	F8VP90:F8W1B7:P50281	NP_004986.1	Mouse:Mmp14|
Matrisome-associated	ECM Regulators	MMP15	matrix metallopeptidase 15 (membrane-inserted)	MT2-MMP|MTMMP2|SMCP-2	7161	7161	H3BT97:P51511	NP_002419.1	Mouse:Mmp15|
Matrisome-associated	ECM Regulators	MMP16	matrix metallopeptidase 16 (membrane-inserted)	C8orf57|DKFZp761D112|MMP-X2|MT-MMP2|MT-MMP3|MT3-MM	7162	7162	E5RJA7:P51512	NP_005932.2	Mouse:Mmp16|
Matrisome-associated	ECM Regulators	MMP17	matrix metallopeptidase 17 (membrane-inserted)	MT4-MMP	7163	7163	F5GWR3:F5GZA7:F5H209:F5H249:F5H846:F5H881:Q9ULZ9	NP_057239.4	Mouse:Mmp17|
Matrisome-associated	ECM Regulators	MMP19	matrix metallopeptidase 19	MMP18|RASI-1	7165	7165	A6ND33:B4DNP3:F8W1C3:Q99542	NP_001259030.1:NP_002420.1	Mouse:Mmp19|
Matrisome-associated	ECM Regulators	MMP2	matrix metallopeptidase 2 (gelatinase A, 72kDa gelatinase, 72kDa type IV collagenase)	CLG4|CLG4A|MMP-II|MONA|TBE-1	7166	7166	H3BR66:H3BS34:H3BV48:J3KRB7:P08253	NP_001121363.1:NP_004521.1	Mouse:Mmp2|
Matrisome-associated	ECM Regulators	MMP20	matrix metallopeptidase 20	AI2A2|MMP-20	7167	7167	O60882	NP_004762.2	Mouse:Mmp20|
Matrisome-associated	ECM Regulators	MMP21	matrix metallopeptidase 21	-	14357	14357	Q8N119	NP_671724.1	Mouse:Mmp21|
Matrisome-associated	ECM Regulators	MMP23B	matrix metallopeptidase 23B	MIFR|MIFR-1|MMP22|MMP23A	7171	7171	B4DMZ6:D6REP6:H0Y6I4:H0YA69:H0YAE5:J3KRS4:O75086:O75900	NP_008914.1	Mouse:Mmp23|
Matrisome-associated	ECM Regulators	MMP24	matrix metallopeptidase 24 (membrane-inserted)	MMP25|MT-MMP5|MT5-MMP	7172	7172	Q9Y5R2	NP_006681.1	Mouse:Mmp24|
Matrisome-associated	ECM Regulators	MMP25	matrix metallopeptidase 25	MMP20|MMP20A|MMPL1|MT-MMP6|MT6-MMP	14246	14246	Q9NPA2	NP_071913.1	Mouse:Mmp25|
Matrisome-associated	ECM Regulators	MMP26	matrix metallopeptidase 26	MGC126590|MGC126592	14249	14249	Q9NRE1	NP_068573.2
Matrisome-associated	ECM Regulators	MMP27	matrix metallopeptidase 27	MMP-27	14250	14250	Q9H306	NP_071405.2	Mouse:Mmp27|
Matrisome-associated	ECM Regulators	MMP28	matrix metallopeptidase 28	EPILYSIN|MM28|MMP-28|MMP25	14366	14366	K7ELN8:K7EMV8:K7ENP0:K7ERF8:Q9H239	NP_001027449.1:NP_077278.1:NP_116568.1	Mouse:Mmp28|
Matrisome-associated	ECM Regulators	MMP3	matrix metallopeptidase 3 (stromelysin 1, progelatinase)	CHDS6|MGC126102|MGC126103|MGC126104|MMP-3|SL-1|STM	7173	7173	E9PKX2:H7C139:P08254	NP_002413.1	Mouse:Mmp3|
Matrisome-associated	ECM Regulators	MMP7	matrix metallopeptidase 7 (matrilysin, uterine)	MMP-7|MPSL1|PUMP-1	7174	7174	P09237	NP_002414.1	Mouse:Mmp7|
Matrisome-associated	ECM Regulators	MMP8	matrix metallopeptidase 8 (neutrophil collagenase)	CLG1|HNC|PMNL-CL	7175	7175	E9PIY7:E9PJB3:E9PL87:H7C1M3:P22894	NP_002415.1	Mouse:Mmp8|
Matrisome-associated	ECM Regulators	MMP9	matrix metallopeptidase 9 (gelatinase B, 92kDa gelatinase, 92kDa type IV collagenase)	CLG4B|GELB|MANDP2|MMP-9	7176	7176	P14780	NP_004985.2	Mouse:Mmp9|
Matrisome-associated	ECM Regulators	NGLY1	N-glycanase 1	FLJ11005|FLJ12409|PNG1|PNGase	17646	17646	C9JU75:H0Y2P2:Q96IV0:Q9NV10	NP_001138765.1:NP_001138766.1:NP_001138767.1:NP_060767.2	Mouse:Ngly1|
Matrisome-associated	ECM Regulators	OGFOD1	2-oxoglutarate and iron-dependent oxygenase domain containing 1	FLJ10826|KIAA1612|TPA1	25585	25585	H3BP48:H3BR02:H3BR79:H3BUA6:J3KNR5:Q8N543	NP_060703.3	Mouse:Ogfod1|
Matrisome-associated	ECM Regulators	OGFOD2	2-oxoglutarate and iron-dependent oxygenase domain containing 2	DKFZp686H15154|FLJ13491|FLJ37501|MGC120434|MGC1204	25823	25823	F5H145:F5H890:Q6N063	NP_078899.1	Mouse:Ogfod2|
Matrisome-associated	ECM Regulators	P4HA1	prolyl 4-hydroxylase, alpha polypeptide I	P4HA	8546	8546	P13674	NP_000908.2:NP_001017962.1:NP_001136067.1:NP_001136068.1	Mouse:P4ha1|
Matrisome-associated	ECM Regulators	P4HA2	prolyl 4-hydroxylase, alpha polypeptide II	-	8547	8547	A8MXE0:C9JCP0:C9JFJ1:C9JIG4:C9JN43:C9JX45:E7ENX0:E7EPI9:E7ERI1:O15460	NP_001017973.1:NP_001017974.1:NP_001136070.1:NP_001136071.1:NP_004190.1:XP_005272173.1:XP_005272174.1:XP_005272175.1:XP_005272176.1:XP_005272177.1:XP_006714791.1:XP_006714792.1:XP_006714793.1	Mouse:P4ha2|
Matrisome-associated	ECM Regulators	P4HA3	prolyl 4-hydroxylase, alpha polypeptide III	-	30135	30135	E9PM97:H0YCC3:Q7Z4N8	NP_001275677.1:NP_878907.1	Mouse:P4ha3|
Matrisome-associated	ECM Regulators	P4HTM	prolyl 4-hydroxylase, transmembrane (endoplasmic reticulum)	EGLN4|HIFPH4|P4H-TM|PH-4|PH4|PHD4	28858	28858	H7C153:Q9NXG6:V9GY20:V9GYK5	NP_808807.2:NP_808808.1	Mouse:P4htm|
Matrisome-associated	ECM Regulators	PAMR1	peptidase domain containing associated with muscle regeneration 1	DKFZP586H2123|FP938|RAMP	24554	24554	E9PIV1:E9PMN5:E9PQ70:Q6UXH9	NP_001001991.1:NP_001269604.1:NP_001269605.1:NP_056245.2:NP_001269604.1	Mouse:Pamr1|
Matrisome-associated	ECM Regulators	PAPPA	pregnancy-associated plasma protein A, pappalysin 1	ASBABP2|DIPLA1|IGFBP-4ase|PAPA|PAPP-A|PAPPA1	8602	8602	F5GZ19:Q13219	NP_002572.2	Mouse:Pappa|
Matrisome-associated	ECM Regulators	PAPPA2	pappalysin 2	PAPP-A2|PAPPE|PLAC3	14615	14615	Q9BXP8	NP_064714.2:NP_068755.2:XP_005245479.1	Mouse:Pappa2|
Matrisome-associated	ECM Regulators	PCSK5	proprotein convertase subtilisin/kexin type 5	PC5|PC6|PC6A|SPC6	8747	8747	B1AMG5:B1AMG8:Q5JSG7:Q92824	NP_001177411.1:NP_006191.2	Mouse:Pcsk5|
Matrisome-associated	ECM Regulators	PCSK6	proprotein convertase subtilisin/kexin type 6	PACE4|SPC4	8569	8569	E7EM82:E7EQ62:E7EWH5:H0Y3Q0:H0YKK2:H0YKZ4:H0YLC8:H0YMW5:H7BXT3:P29122	NP_001278238.1:NP_002561.1:NP_612192.1:NP_612195.1:NP_612196.1:NP_612197.1:NP_612198.2	Mouse:Pcsk6|
Matrisome-associated	ECM Regulators	PI3	peptidase inhibitor 3, skin-derived	ESI|MGC13613|SKALP|WAP3|WFDC14|cementoin	8947	8947	P19957	NP_002629.1
Matrisome-associated	ECM Regulators	PLAT	plasminogen activator, tissue	DKFZp686I03148|T-PA|TPA	9051	9051	B4DN26:B4DNJ1:E5RGA1:E5RHG4:E7ESF4:H0YBH9:K4DI88:P00750	NP_000921.1:NP_127509.1	Mouse:Plat|
Matrisome-associated	ECM Regulators	PLAU	plasminogen activator, urokinase	ATF|UPA|URK|u-PA	9052	9052	E7ESM2:E7ET40:P00749:S4R3G7	NP_001138503.1:NP_002649.1	Mouse:Plau|
Matrisome-associated	ECM Regulators	PLG	plasminogen	DKFZp779M0222	9071	9071	A6PVI2:P00747:Q5TEH5	NP_000292.1:NP_001161810.1	Mouse:Plg|
Matrisome-associated	ECM Regulators	PLOD1	procollagen-lysine 1, 2-oxoglutarate 5-dioxygenase 1	FLJ42041|LH|LH1|LLH|PLOD	9081	9081	B4DR87:Q02809:Q5JXB7:Q5JXB8:Q5JXB9	NP_000293.2	Mouse:Plod1|
Matrisome-associated	ECM Regulators	PLOD2	procollagen-lysine, 2-oxoglutarate 5-dioxygenase 2	LH2|TLH	9082	9082	B3KWS3:C9JXZ0:E7ETU9:F8WEW3:O00469	NP_000926.2:NP_891988.1	Mouse:Plod2|
Matrisome-associated	ECM Regulators	PLOD3	procollagen-lysine, 2-oxoglutarate 5-dioxygenase 3	LH3	9083	9083	C9JIX5:C9JU11:H7C0B8:H7C2A8:H7C2S8:H7C2V1:O60568	NP_001075.1	Mouse:Plod3|
Matrisome-associated	ECM Regulators	PRSS1	protease, serine, 1 (trypsin 1)	TRP1|TRY1|TRY4|TRYP1	9475	9475	E7EQ64:H0Y8D1:P07477	NP_002760.1	Mouse:Gm10334|Mouse:Gm5409|Mouse:Gm5771|Mouse:Prss1|Mouse:Prss2|Mouse:Prss3|Mouse:Try10|Mouse:Try4|Mouse:Try5|
Matrisome-associated	ECM Regulators	PRSS12	protease, serine, 12 (neurotrypsin, motopsin)	BSSP-3|BSSP3|MGC12722|MRT1	9477	9477	P56730	NP_003610.2	Mouse:Prss12|
Matrisome-associated	ECM Regulators	PRSS2	protease, serine, 2 (trypsin 2)	MGC111183|MGC120174|TRY2|TRY8|TRYP2	9483	9483	P07478	NP_002761.1	Mouse:Gm10334|Mouse:Gm5409|Mouse:Gm5771|Mouse:Prss1|Mouse:Prss2|Mouse:Prss3|Mouse:Try10|Mouse:Try4|Mouse:Try5|
Matrisome-associated	ECM Regulators	PRSS3	protease, serine, 3	MTG|PRSS4|TRY3|TRY4	9486	9486	B1AN99:P35030	NP_001184026.2:NP_001184027.1:NP_002762.2:NP_031369.2	Mouse:Gm10334|Mouse:Gm5409|Mouse:Gm5771|Mouse:Prss1|Mouse:Prss2|Mouse:Prss3|Mouse:Try10|Mouse:Try4|Mouse:Try5|
Matrisome-associated	ECM Regulators	PZP	pregnancy-zone protein	CPAMD6|MGC133093	9750	9750	F5GXY0:P20742	NP_002855.2	Mouse:Pzp|
Matrisome-associated	ECM Regulators	SERPINA1	serpin peptidase inhibitor, clade A (alpha-1 antiproteinase, antitrypsin), member 1	A1A|A1AT|AAT|MGC23330|MGC9222|PI|PI1|PRO2275	8941	8941	G3V2B9:G3V387:G3V4I7:G3V544:G3V5R8:P01009	NP_000286.3:NP_001002235.1:NP_001002236.1:NP_001121172.1:NP_001121173.1:NP_001121174.1:NP_001121175.1:NP_001121176.1:NP_001121177.1:NP_001121178.1:NP_001121179.1	Mouse:Serpina1a|Mouse:Serpina1b|Mouse:Serpina1c|Mouse:Serpina1d|Mouse:Serpina1e|Mouse:Serpina1f|
Matrisome-associated	ECM Regulators	SERPINA10	serpin peptidase inhibitor, clade A (alpha-1 antiproteinase, antitrypsin), member 10	PZI|ZPI	15996	15996	G3V2W1:Q9UK55	NP_001094077.1:NP_057270.1:XP_005267790.1:XP_006725227.1:XP_006720222.1:XP_006725226.1	Mouse:Serpina10|
Matrisome-associated	ECM Regulators	SERPINA11	serpin peptidase inhibitor, clade A (alpha-1 antiproteinase, antitrypsin), member 11	-	19193	19193	Q86U17	NP_001073920.1	Mouse:Serpina11|
Matrisome-associated	ECM Regulators	SERPINA12	serpin peptidase inhibitor, clade A (alpha-1 antiproteinase, antitrypsin), member 12	OL-64	18359	18359	Q8IW75	NP_776249.1:XP_005267408.1	Mouse:Serpina12|
Matrisome-associated	ECM Regulators	SERPINA2	serpin peptidase inhibitor, clade A (alpha-1 antiproteinase, antitrypsin), member 2	ARGS|ATR|PIL|psiATR	8985	8985	P20848	NP_006211.2
Matrisome-associated	ECM Regulators	SERPINA3	serpin peptidase inhibitor, clade A (alpha-1 antiproteinase, antitrypsin), member 3	AACT|ACT|GIG24|GIG25|MGC88254	16	16	G3V3A0:G3V595:P01011	NP_001076.2	Mouse:Serpina3a|Mouse:Serpina3b|Mouse:Serpina3c|Mouse:Serpina3f|Mouse:Serpina3g|Mouse:Serpina3h|Mouse:Serpina3k|Mouse:Serpina3m|Mouse:Serpina3n|
Matrisome-associated	ECM Regulators	SERPINA4	serpin peptidase inhibitor, clade A (alpha-1 antiproteinase, antitrypsin), member 4	KAL|KLST|KST|PI4|kallistatin	8948	8948	P29622	NP_001275961.1:NP_001275962.1:NP_006206.2	Mouse:Serpina4-ps1|
Matrisome-associated	ECM Regulators	SERPINA5	serpin peptidase inhibitor, clade A (alpha-1 antiproteinase, antitrypsin), member 5	PAI3|PCI|PLANH3|PROCI	8723	8723	G3V264:G3V265:G3V2M1:G3V3F5:G3V3Y3:G3V482:G3V4B4:G3V5Q9:P05154	NP_000615.3	Mouse:Serpina5|
Matrisome-associated	ECM Regulators	SERPINA6	serpin peptidase inhibitor, clade A (alpha-1 antiproteinase, antitrypsin), member 6	CBG	1540	1540	G3V350:G3V4V7:P08185	NP_001747.2	Mouse:Serpina6|
Matrisome-associated	ECM Regulators	SERPINA7	serpin peptidase inhibitor, clade A (alpha-1 antiproteinase, antitrypsin), member 7	TBG	11583	11583	P05543	NP_000345.2	Mouse:Serpina7|
Matrisome-associated	ECM Regulators	SERPINA9	serpin peptidase inhibitor, clade A (alpha-1 antiproteinase, antitrypsin), member 9	GCET1|MGC131906|SERPINA11|SERPINA11b	15995	15995	Q86WD7	NP_001035983.1:NP_001271204.1:NP_001271205.1:NP_783866.2	Mouse:Serpina9|
Matrisome-associated	ECM Regulators	SERPINB1	serpin peptidase inhibitor, clade B (ovalbumin), member 1	EI|ELANH2|LEI|M/NEI|MNEI|PI2	3311	3311	B4DNT0:P30740	NP_109591.1:XP_006715071.1	Mouse:Serpinb1a|Mouse:Serpinb1b|Mouse:Serpinb1c|
Matrisome-associated	ECM Regulators	SERPINB10	serpin peptidase inhibitor, clade B (ovalbumin), member 10	PI10|bomapin	8942	8942	H7BYS2:H7C004:P48595	NP_005015.1	Mouse:Serpinb10|
Matrisome-associated	ECM Regulators	SERPINB11	serpin peptidase inhibitor, clade B (ovalbumin), member 11 (gene/pseudogene)	EPIPIN|MGC163242|MGC163244|SERPIN11	14221	14221	F5GWT8:F5GY69:F5GYW9:Q96P15	NP_001278207.1:NP_536723.2:NP_001278208.1:NP_536723.2	Mouse:Serpinb11|
Matrisome-associated	ECM Regulators	SERPINB12	serpin peptidase inhibitor, clade B (ovalbumin), member 12	MGC119247|MGC119248|YUKOPIN	14220	14220	Q3SYB4:Q96P63	NP_536722.1:XP_005266835.1	Mouse:Serpinb12|
Matrisome-associated	ECM Regulators	SERPINB13	serpin peptidase inhibitor, clade B (ovalbumin), member 13	HSHUR7SEQ|HUR7|MGC126870|PI13|headpin	8944	8944	C9JL93:F8WE70:H7BZS9:Q9UIV8	NP_036529.1	Mouse:Serpinb13|
Matrisome-associated	ECM Regulators	SERPINB2	serpin peptidase inhibitor, clade B (ovalbumin), member 2	HsT1201|PAI|PAI-2|PAI2|PLANH2	8584	8584	E7EPJ9:E7ERB5:E9PDK7:P05120	NP_001137290.1:NP_002566.1	Mouse:Serpinb2|
Matrisome-associated	ECM Regulators	SERPINB3	serpin peptidase inhibitor, clade B (ovalbumin), member 3	HsT1196|SCC|SCCA-1|SCCA-PD|SCCA1|T4-A	10569	10569	P29508	NP_008850.1
Matrisome-associated	ECM Regulators	SERPINB4	serpin peptidase inhibitor, clade B (ovalbumin), member 4	LEUPIN|PI11|SCCA-2|SCCA1|SCCA2	10570	10570	C9JZ65:F8W9L1:H0Y5H9:P48594	NP_002965.1	Mouse:Gm8080|
Matrisome-associated	ECM Regulators	SERPINB5	serpin peptidase inhibitor, clade B (ovalbumin), member 5	PI5|maspin	8949	8949	C9JLM5:P36952	NP_002630.2	Mouse:Serpinb5|
Matrisome-associated	ECM Regulators	SERPINB6	serpin peptidase inhibitor, clade B (ovalbumin), member 6	CAP|DKFZp686I04222|MGC111370|MSTP057|PI6|PTI|SPI3	8950	8950	P35237	NP_001182220.2:NP_001258751.1:NP_001258752.1:NP_001258753.1:NP_001258754.1:NP_004559.4	Mouse:Serpinb6a|Mouse:Serpinb6b|Mouse:Serpinb6c|Mouse:Serpinb6d|
Matrisome-associated	ECM Regulators	SERPINB7	serpin peptidase inhibitor, clade B (ovalbumin), member 7	DKFZp686D06190|MEGSIN|MGC120014|MGC120015	13902	13902	C9JA68:C9JM00:C9JZR8:O75635	NP_001035237.1:NP_001248759.1:NP_001248760.1:NP_003775.1:XP_006722625.1	Mouse:Serpinb7|
Matrisome-associated	ECM Regulators	SERPINB8	serpin peptidase inhibitor, clade B (ovalbumin), member 8	CAP2|PI8	8952	8952	C9JTJ8:C9JVA8:H7BXK7:P50452	NP_001027018.1:NP_001263419.1:NP_002631.3:NP_942130.1	Mouse:Serpinb8|
Matrisome-associated	ECM Regulators	SERPINB9	serpin peptidase inhibitor, clade B (ovalbumin), member 9	CAP-3|CAP3|PI9	8955	8955	P50453	NP_004146.1:XP_005249241.1	Mouse:Serpinb9|Mouse:Serpinb9b|Mouse:Serpinb9c|Mouse:Serpinb9d|Mouse:Serpinb9e|Mouse:Serpinb9f|Mouse:Serpinb9g|
Matrisome-associated	ECM Regulators	SERPINC1	serpin peptidase inhibitor, clade C (antithrombin), member 1	AT3|ATIII|MGC22579	775	775	P01008	NP_000479.1	Mouse:Serpinc1|
Matrisome-associated	ECM Regulators	SERPIND1	serpin peptidase inhibitor, clade D (heparin cofactor), member 1	D22S673|HC2|HCF2|HCII|HLS2|LS2	4838	4838	P05546	NP_000176.2:XP_005261654.1	Mouse:Serpind1|
Matrisome-associated	ECM Regulators	SERPINE1	serpin peptidase inhibitor, clade E (nexin, plasminogen activator inhibitor type 1), member 1	PAI|PAI-1|PAI1|PLANH1	8583	8583	P05121	NP_000593.1	Mouse:Serpine1|
Matrisome-associated	ECM Regulators	SERPINE2	serpin peptidase inhibitor, clade E (nexin, plasminogen activator inhibitor type 1), member 2	GDN|PI7|PN1|PNI	8951	8951	C9JN98:C9JRK5:C9K031:P07093	NP_001130000.1:NP_001130002.1:NP_006207.1:XP_005246699.1	Mouse:Serpine2|
Matrisome-associated	ECM Regulators	SERPINE3	serpin peptidase inhibitor, clade E (nexin, plasminogen activator inhibitor type 1), member 3	-	24774	24774	A8MV23:E5RG55	NP_001094790.1	Mouse:Serpine3|
Matrisome-associated	ECM Regulators	SERPINF1	serpin peptidase inhibitor, clade F (alpha-2 antiplasmin, pigment epithelium derived factor), member 1	EPC-1|PEDF|PIG35	8824	8824	I3L107:I3L1U4:I3L2R7:I3L3Z3:I3L425:I3L4F9:I3L4N7:I3L4Z0:P36955	NP_002606.3	Mouse:Serpinf1|
Matrisome-associated	ECM Regulators	SERPINF2	serpin peptidase inhibitor, clade F (alpha-2 antiplasmin, pigment epithelium derived factor), member 2	A2AP|AAP|ALPHA-2-PI|API|PLI	9075	9075	C9JMH6:C9JPV4:P08697	NP_000925.2:NP_001159392.1:NP_001159393.1:XP_005256758.1	Mouse:Serpinf2|
Matrisome-associated	ECM Regulators	SERPING1	serpin peptidase inhibitor, clade G (C1 inhibitor), member 1	C1IN|C1INH|C1NH|HAE1|HAE2	1228	1228	B4E1F0:B4E1H2:B5MCB9:C9JZJ9:E9PGN7:E9PK97:H0YCA1:H9KV48:P05155	NP_000053.2:NP_001027466.1	Mouse:Serping1|
Matrisome-associated	ECM Regulators	SERPINH1	serpin peptidase inhibitor, clade H (heat shock protein 47), member 1, (collagen binding protein 1)	AsTP3|CBP1|CBP2|HSP47|PIG14|PPROM|RA-A47|SERPINH2|	1546	1546	E9PIG2:E9PJH8:E9PK86:E9PKH2:E9PLA6:E9PMI5:E9PNX1:E9PPV6:E9PQ34:E9PR70:E9PRS3:H0YEP8:P50454	NP_001193943.1:NP_001226.2:XP_006718790.1:XP_006718791.1:XP_006718792.1	Mouse:Serpinh1|
Matrisome-associated	ECM Regulators	SERPINI1	serpin peptidase inhibitor, clade I (neuroserpin), member 1	DKFZp781N13156|PI12|neuroserpin	8943	8943	C9JDY5:C9JQU8:H7C5T9:Q99574	NP_001116224.1:NP_005016.1:XP_006713720.1	Mouse:Serpini1|
Matrisome-associated	ECM Regulators	SERPINI2	serpin peptidase inhibitor, clade I (pancpin), member 2	MEPI|PANCPIN|PI14|TSA2004	8945	8945	C9J7N5:C9JWE1:O75830	NP_001012303.1:NP_006208.1	Mouse:Serpini2|
Matrisome-associated	ECM Regulators	SLPI	secretory leukocyte peptidase inhibitor	ALK1|ALP|BLPI|HUSI|HUSI-I|MPI|WAP4|WFDC4	11092	11092	P03973	NP_003055.1	Mouse:Slpi|
Matrisome-associated	ECM Regulators	SPAM1	sperm adhesion molecule 1 (PH-20 hyaluronidase, zona pellucida binding)	HYA1|HYAL1|HYAL3|HYAL5|MGC26532|PH-20|PH20|SPAG15	11217	11217	C9J2X5:P38567	NP_001167515.1:NP_001167516.1:NP_001167517.1:NP_003108.2:NP_694859.1	Mouse:Hyal5|Mouse:Spam1|
Matrisome-associated	ECM Regulators	ST14	suppression of tumorigenicity 14 (colon carcinoma)	HAI|MT-SP1|MTSP1|PRSS14|SNC19|TADG15	11344	11344	Q9Y5Y6	NP_068813.1	Mouse:St14|
Matrisome-associated	ECM Regulators	SULF1	sulfatase 1	FLJ30905|FLJ38022|FLJ41750|HSULF-1|KIAA1077|SULF-1	20391	20391	E9PI06:E9PJL8:E9PLS5:E9PPQ3:E9PS14:H0YDR1:Q8IWU6	NP_001121676.1:NP_001121677.1:NP_001121678.1:NP_055985.2	Mouse:Sulf1|
Matrisome-associated	ECM Regulators	SULF2	sulfatase 2	DKFZp313E091|FLJ44488|FLJ90554|HSULF-2|KIAA1247|MG	20392	20392	B1AMP9:G3XAE6:H0Y872:Q8IWU5	NP_001155313.1:NP_061325.1:NP_940998.2:XP_005260515.1:XP_006723893.1	Mouse:Sulf2|
Matrisome-associated	ECM Regulators	TGM1	transglutaminase 1 (K polypeptide epidermal type I, protein-glutamine-gamma-glutamyltransferase)	ICR2|KTG|LI|LI1|TGASE|TGK	11777	11777	B4DWR7:H0YKI6:H0YLJ6:H0YLT9:H0YMQ8:H0YN27:H0YNM4:P22735	NP_000350.1	Mouse:Tgm1|
Matrisome-associated	ECM Regulators	TGM2	transglutaminase 2 (C polypeptide, protein-glutamine-gamma-glutamyltransferase)	G-ALPHA-h|GNAH|TG2|TGC	11778	11778	A2A299:A2A2A0:B4DIT7:F5H6P0:P21980	NP_004604.2:NP_945189.1	Mouse:Tgm2|
Matrisome-associated	ECM Regulators	TGM3	transglutaminase 3 (E polypeptide, protein-glutamine-gamma-glutamyltransferase)	MGC126249|MGC126250|TGE	11779	11779	Q08188	NP_003236.3	Mouse:Tgm3|
Matrisome-associated	ECM Regulators	TGM4	transglutaminase 4 (prostate)	FLJ26776|TGP|hTGP	11780	11780	F8WCU8:P49221	NP_003232.2	Mouse:Tgm4|
Matrisome-associated	ECM Regulators	TGM5	transglutaminase 5	MGC141907|TGASE5|TGASEX|TGM6|TGMX|TGX	11781	11781	O43548	NP_004236.1:NP_963925.2	Mouse:Tgm5|
Matrisome-associated	ECM Regulators	TGM6	transglutaminase 6	TGM3L|TGY|dJ734P14.3	16255	16255	O95932	NP_001241663.1:NP_945345.2	Mouse:Tgm6|
Matrisome-associated	ECM Regulators	TGM7	transglutaminase 7	TGMZ	30790	30790	Q96PF1	NP_443187.1	Mouse:Tgm7|
Matrisome-associated	ECM Regulators	TIMP1	TIMP metallopeptidase inhibitor 1	CLGI|EPA|EPO|FLJ90373|HCI|TIMP	11820	11820	B4DJK3:H0Y789:P01033:Q5H9A7:Q5H9B4:Q5H9B5	NP_003245.1:XP_005272702.1	Mouse:Timp1|
Matrisome-associated	ECM Regulators	TIMP2	TIMP metallopeptidase inhibitor 2	CSC-21K	11821	11821	B4DFW2:K7EIX4:P16035	NP_003246.1	Mouse:Timp2|
Matrisome-associated	ECM Regulators	TIMP3	TIMP metallopeptidase inhibitor 3	HSMRK222|K222|K222TA2|SFD	11822	11822	P35625	NP_000353.1	Mouse:Timp3|
Matrisome-associated	ECM Regulators	TIMP4	TIMP metallopeptidase inhibitor 4	-	11823	11823	Q99727	NP_003247.1	Mouse:Timp4|
Matrisome-associated	ECM Regulators	TLL1	tolloid-like 1	ASD6|TLL	11843	11843	D6RAK5:D6RBI6:D6RCE0:E9PD25:O43897	NP_001191689.1:NP_036596.3	Mouse:Tll1|
Matrisome-associated	ECM Regulators	TLL2	tolloid-like 2	KIAA0932|MGC133312|MGC133313	11844	11844	Q9Y6L7	NP_036597.1	Mouse:Tll2|
Matrisome-associated	ECM Regulators	TMPRSS15	protease, serine, 7 (enterokinase)	ENTK|MGC133046|TMPRSS15|PRSS7	9490	9490	E9PG70:P98073	NP_002763.2	Mouse:Tmprss15|
Matrisome-associated	Secreted Factors	AMH	anti-Mullerian hormone	MIF|MIS	464	464	K7EJU5:P03971	NP_000470.2	Mouse:Amh|
Matrisome-associated	Secreted Factors	ANGPT1	angiopoietin 1	AGP1|AGPT|ANG1	484	484	B4DTQ9:E5RFF4:E7ERK4:Q15389	NP_001137.2:NP_001186788.1	Mouse:Angpt1|
Matrisome-associated	Secreted Factors	ANGPT2	angiopoietin 2	AGPT2|ANG2	485	485	E7EVQ3:O15123	NP_001112359.1:NP_001112360.1:NP_001138.1	Mouse:Angpt2|
Matrisome-associated	Secreted Factors	ANGPT4	angiopoietin 4	AGP4|ANG-3|ANG4|MGC138181|MGC138183	487	487	Q9Y264	NP_057069.1	Mouse:Angpt4|
Matrisome-associated	Secreted Factors	ANGPTL1	angiopoietin-like 1	ANG3|ANGPT3|ARP1|AngY|KIAA0351|UNQ162|dJ595C2.2	489	489	O95841	NP_004664.1:XP_005245634.1	Mouse:Angptl1|
Matrisome-associated	Secreted Factors	ANGPTL2	angiopoietin-like 2	ARP2|HARP|MGC8889	490	490	Q8NCH7:Q9UKU9	NP_036230.1	Mouse:Angptl2|
Matrisome-associated	Secreted Factors	ANGPTL3	angiopoietin-like 3	ANGPT5	491	491	Q9Y5C1	NP_055310.1	Mouse:Angptl3|
Matrisome-associated	Secreted Factors	ANGPTL4	angiopoietin-like 4	ANGPTL2|ARP4|FIAF|HFARP|NL2|PGAR|pp1158	16039	16039	M0QZ51:M0R0N8:M0R2X8:M0R369:M0R3A2:Q9BY76	NP_001034756.1:NP_647475.1	Mouse:Angptl4|
Matrisome-associated	Secreted Factors	ANGPTL5	angiopoietin-like 5	-	19705	19705	E9PKF7:Q86XS5	NP_835228.2
Matrisome-associated	Secreted Factors	ANGPTL6	angiopoietin-like 6	AGF|ARP5	23140	23140	K7EKF6:Q8NI99	NP_114123.2	Mouse:Angptl6|
Matrisome-associated	Secreted Factors	ANGPTL7	angiopoietin-like 7	AngX|CDT6|RP4-647M16.2|dJ647M16.1	24078	24078	O43827	NP_066969.1	Mouse:Angptl7|
Matrisome-associated	Secreted Factors	AREG	amphiregulin	AR|AREGB|CRDGF|MGC13647|SDGF	651	651	D6RFX5:P15514	NP_001648.1	Mouse:Areg|
Matrisome-associated	Secreted Factors	ARTN	artemin	ENOVIN|EVN|NBN	727	727	E9PIK2:E9PLG3:E9PN22:Q5T4W7	NP_001129687.1:NP_476431.2:NP_476432.2:XP_006711086.1:XP_006711087.1	Mouse:Artn|
Matrisome-associated	Secreted Factors	BDNF	brain-derived neurotrophic factor	MGC34632	1033	1033	E9PMP3:P23560	NP_001137277.1:NP_001137278.1:NP_001137279.1:NP_001137280.1:NP_001137281.1:NP_001137282.1:NP_001137283.1:NP_001137284.1:NP_001137285.1:NP_001137286.1:NP_001137288.1:NP_001700.2:NP_733927.1:NP_733928.1:NP_733929.1:NP_733930.1:NP_733931.1	Mouse:Bdnf|
Matrisome-associated	Secreted Factors	BMP10	bone morphogenetic protein 10	MGC126783	20869	20869	O95393	NP_055297.1	Mouse:Bmp10|
Matrisome-associated	Secreted Factors	BMP15	bone morphogenetic protein 15	GDF9B|ODG2|POF4	1068	1068	O95972	NP_005439.2	Mouse:Bmp15|
Matrisome-associated	Secreted Factors	BMP2	bone morphogenetic protein 2	BMP2A	1069	1069	P12643	NP_001191.1	Mouse:Bmp2|
Matrisome-associated	Secreted Factors	BMP3	bone morphogenetic protein 3	BMP-3A	1070	1070	P12645	NP_001192.2	Mouse:Bmp3|
Matrisome-associated	Secreted Factors	BMP4	bone morphogenetic protein 4	BMP2B|BMP2B1|MCOPS6|OFC11|ZYME	1071	1071	H0YLW3:H0YM53:H0YMP9:P12644:V9GYF1	NP_001193.2:NP_570911.2:NP_570912.2:XP_005268072.1	Mouse:Bmp4|
Matrisome-associated	Secreted Factors	BMP5	bone morphogenetic protein 5	MGC34244	1072	1072	B4E0Y4:P22003	NP_066551.1	Mouse:Bmp5|
Matrisome-associated	Secreted Factors	BMP6	bone morphogenetic protein 6	VGR|VGR1	1073	1073	P22004	NP_001709.1	Mouse:Bmp6|
Matrisome-associated	Secreted Factors	BMP7	bone morphogenetic protein 7	OP-1	1074	1074	B1AKZ9:B1AL00:H0Y4B5:P18075	NP_001710.1	Mouse:Bmp7|
Matrisome-associated	Secreted Factors	BMP8A	bone morphogenetic protein 8a	FLJ14351|FLJ45264	21650	21650	Q7Z5Y6	NP_861525.2	Mouse:Bmp8a|
Matrisome-associated	Secreted Factors	BMP8B	bone morphogenetic protein 8b	BMP8|MGC131757|OP2	1075	1075	E7EMY8:P34820	NP_001711.2	Mouse:Bmp8b|
Matrisome-associated	Secreted Factors	BRINP2	family with sequence similarity 5, member B	BRINP2|DBCCR1L2|FLJ41342|KIAA1747|RP5-1026E2.1|FAM5B	13746	13746	Q9C0B6	NP_066988.1:XP_005245436.1	Mouse:Brinp2|
Matrisome-associated	Secreted Factors	BRINP3	family with sequence similarity 5, member C	BRINP3|DBCCR1L|DBCCR1L1|RP11-445K1.1|FAM5C	22393	22393	B1AMP1:B7Z260:Q76B58	NP_950252.1:XP_005245174.1:XP_005245175.1:XP_005245176.1:XP_005245177.1	Mouse:Brinp3|
Matrisome-associated	Secreted Factors	BTC	betacellulin	-	1121	1121	H0Y8Q5:P35070	NP_001720.1	Mouse:Btc|
Matrisome-associated	Secreted Factors	C1QTNF9B	C1q and tumor necrosis factor related protein 9B	RP11-45B20.2|CTRP9B|MGC117159	34072	34072	B2RNN3	NP_001007538.1
Matrisome-associated	Secreted Factors	CBLN1	cerebellin 1 precursor	-	1543	1543	H3BQD0:P23435	NP_004343.1	Mouse:Cbln1|
Matrisome-associated	Secreted Factors	CBLN2	cerebellin 2 precursor	-	1544	1544	J3KST0:J3QS23:Q8IUK8	NP_872317.1:XP_006722457.1	Mouse:Cbln2|
Matrisome-associated	Secreted Factors	CBLN3	cerebellin 3 precursor	PRO1486	20146	20146	G3V2Y8:Q6UW01	NP_001034860.1	Mouse:Cbln3|
Matrisome-associated	Secreted Factors	CBLN4	cerebellin 4 precursor	CBLNL1	16231	16231	Q9NTU7	NP_542184.1	Mouse:Cbln4|
Matrisome-associated	Secreted Factors	CCBE1	collagen and calcium binding EGF domains 1	FLJ30681|MGC50861	29426	29426	K7EQ81:Q6UXH8	NP_597716.1:XP_005266705.1:XP_005266706.1:XP_006722456.1	Mouse:Ccbe1|
Matrisome-associated	Secreted Factors	CCL1	chemokine (C-C motif) ligand 1	I-309|P500|SCYA1|SISe|TCA3	10609	10609	P22362	NP_002972.1	Mouse:Ccl1|
Matrisome-associated	Secreted Factors	CCL11	chemokine (C-C motif) ligand 11	MGC22554|SCYA11	10610	10610	P51671	NP_002977.1	Mouse:Ccl11|
Matrisome-associated	Secreted Factors	CCL13	chemokine (C-C motif) ligand 13	CKb10|MCP-4|MGC17134|NCC-1|NCC1|SCYA13|SCYL1	10611	10611	J3QLQ9:Q99616	NP_005399.1
Matrisome-associated	Secreted Factors	CCL14	chemokine (C-C motif) ligand 14	CC-1|CC-3|CKb1|FLJ16015|HCC-1|HCC-3|MCIF|NCC-2|NCC	10612	10612	K7END2:Q16627	NP_116738.1:NP_116739.1
Matrisome-associated	Secreted Factors	CCL15	chemokine (C-C motif) ligand 15	HCC-2|HMRP-2B|LKN1|Lkn-1|MIP-1d|MIP-5|NCC-3|NCC3|S	10613	10613	H7BYL4:Q16663	NP_116741.2
Matrisome-associated	Secreted Factors	CCL16	chemokine (C-C motif) ligand 16	CKb12|HCC-4|ILINCK|LCC-1|LEC|LMC|MGC117051|Mtn-1|N	10614	10614	H0YCC1:K7ELY7:O15467	NP_004581.1:XP_005258077.1:XP_006725397.1	Mouse:Ccl16-ps|
Matrisome-associated	Secreted Factors	CCL17	chemokine (C-C motif) ligand 17	A-152E5.3|ABCD-2|MGC138271|MGC138273|SCYA17|TARC	10615	10615	Q92583	NP_002978.1	Mouse:Ccl17|
Matrisome-associated	Secreted Factors	CCL18	chemokine (C-C motif) ligand 18 (pulmonary and activation-regulated)	AMAC-1|AMAC1|CKb7|DC-CK1|DCCK1|MIP-4|PARC|SCYA18	10616	10616	P55774	NP_002979.1
Matrisome-associated	Secreted Factors	CCL19	chemokine (C-C motif) ligand 19	CKb11|ELC|MGC34433|MIP-3b|MIP3B|SCYA19	10617	10617	Q5VZ75:Q99731	NP_006265.1	Mouse:Ccl19|
Matrisome-associated	Secreted Factors	CCL2	chemokine (C-C motif) ligand 2	GDCF-2|HC11|HSMCR30|MCAF|MCP-1|MCP1|MGC9434|SCYA2|	10618	10618	J3KRT7:P13500	NP_002973.1	Mouse:Ccl2|
Matrisome-associated	Secreted Factors	CCL20	chemokine (C-C motif) ligand 20	CKb4|LARC|MIP-3a|MIP3A|SCYA20|ST38	10619	10619	P78556	NP_001123518.1:NP_004582.1	Mouse:Ccl20|
Matrisome-associated	Secreted Factors	CCL21	chemokine (C-C motif) ligand 21	6Ckine|CKb9|ECL|MGC34555|SCYA21|SLC|TCA4	10620	10620	O00585:Q5VZ73	NP_002980.1	Mouse:Ccl21a|Mouse:Ccl21b|Mouse:Ccl21c|
Matrisome-associated	Secreted Factors	CCL22	chemokine (C-C motif) ligand 22	A-152E5.1|ABCD-1|DC/B-CK|MDC|MGC34554|SCYA22|STCP-	10621	10621	O00626	NP_002981.2	Mouse:Ccl22|
Matrisome-associated	Secreted Factors	CCL23	chemokine (C-C motif) ligand 23	CK-BETA-8|CKb8|Ckb-8|Ckb-8-1|MIP-3|MIP3|MPIF-1|SCY	10622	10622	K7EMG9:P55773	NP_005055.3:NP_665905.2
Matrisome-associated	Secreted Factors	CCL24	chemokine (C-C motif) ligand 24	Ckb-6|MPIF-2|MPIF2|SCYA24	10623	10623	O00175	NP_002982.2	Mouse:Ccl24|
Matrisome-associated	Secreted Factors	CCL25	chemokine (C-C motif) ligand 25	Ckb15|MGC150327|SCYA25|TECK	10624	10624	C9JDZ7:O15444	NP_001188288.1:NP_005615.2	Mouse:Ccl25|
Matrisome-associated	Secreted Factors	CCL26	chemokine (C-C motif) ligand 26	IMAC|MGC126714|MIP-4a|MIP-4alpha|SCYA26|TSC-1	10625	10625	Q9Y258	NP_006063.1	Mouse:Ccl26|
Matrisome-associated	Secreted Factors	CCL27	chemokine (C-C motif) ligand 27	ALP|CTACK|CTAK|ESKINE|ILC|PESKY|SCYA27	10626	10626	Q9Y4X3	NP_006655.1	Mouse:Ccl27a|Mouse:Gm13306|Mouse:Gm13308|
Matrisome-associated	Secreted Factors	CCL28	chemokine (C-C motif) ligand 28	CCK1|MEC|MGC71902|SCYA28	17700	17700	D6RC73:Q9NRJ3	NP_683513.1:XP_005248382.1	Mouse:Ccl28|
Matrisome-associated	Secreted Factors	CCL3	chemokine (C-C motif) ligand 3	G0S19-1|LD78ALPHA|MIP-1-alpha|MIP1A|SCYA3	10627	10627	P10147	NP_002974.1	Mouse:Ccl3|
Matrisome-associated	Secreted Factors	CCL3L3	chemokine (C-C motif) ligand 3-like 3	464.2|CCL3L1|D17S1718|LD78|LD78BETA|MGC12815|SCYA3	30554	30554	A8MVB7:P16619	NP_001001437.2:NP_066286.1	Mouse:Ccl3|
Matrisome-associated	Secreted Factors	CCL4	chemokine (C-C motif) ligand 4	ACT2|AT744.1|G-26|LAG1|MGC104418|MGC126025|MGC1260	10630	10630	P13236:Q7M4M2	NP_002975.1:NP_996890.1	Mouse:Ccl4|
Matrisome-associated	Secreted Factors	CCL4L1	chemokine (C-C motif) ligand 4-like 1	AT744.2|CCL4L|CCL4L2|LAG-1|LAG1|SCYA4L	10631	10631	F8W8U7:F8WAL9:Q8NHW4	NP_001278397.1:NP_001278398.1:NP_001278399.1:NP_001278400.1:NP_001278401.1:NP_001278402.1:NP_001278403.1:NP_001278404.1:NP_996890.1	Mouse:Ccl4|
Matrisome-associated	Secreted Factors	CCL4L2	chemokine (C-C motif) ligand 4-like 2	AT744.2|CCL4L|SCYA4L	24066	24066	F8W8W8:Q8NHW4	NP_001278397.1:NP_001278398.1:NP_001278399.1:NP_001278400.1:NP_001278401.1:NP_001278402.1:NP_001278403.1:NP_001278404.1:NP_996890.1	Mouse:Ccl4|
Matrisome-associated	Secreted Factors	CCL5	chemokine (C-C motif) ligand 5	D17S136E|MGC17164|RANTES|SCYA5|SISd|TCP228	10632	10632	K7EJM0:P13501	NP_002976.2	Mouse:Ccl5|
Matrisome-associated	Secreted Factors	CCL7	chemokine (C-C motif) ligand 7	FIC|MARC|MCP-3|MCP3|MGC138463|MGC138465|NC28|SCYA6	10634	10634	A8MVH1:A8MX17:P80098:Q7Z7Q8	NP_006264.2	Mouse:Ccl7|
Matrisome-associated	Secreted Factors	CCL8	chemokine (C-C motif) ligand 8	HC14|MCP-2|MCP2|SCYA10|SCYA8	10635	10635	P80075	NP_005614.2	Mouse:Ccl8|
Matrisome-associated	Secreted Factors	CFC1	cripto, FRL-1, cryptic family 1	CRYPTIC|FLJ77897|HTX2|MGC133213	18292	18292	P0CG37	NP_001257349.1:NP_001257350.1:NP_115934.1	Mouse:Cfc1|
Matrisome-associated	Secreted Factors	CFC1B	cripto, FRL-1, cryptic family 1B	-	33983	33983	P0CG36	NP_001072998.1
Matrisome-associated	Secreted Factors	CHRD	chordin	MGC133038	1949	1949	B7Z6F4:E7ESX1:Q9H2X0	NP_003732.2:XP_005247907.1	Mouse:Chrd|
Matrisome-associated	Secreted Factors	CHRDL1	chordin-like 1	CHL|NRLN1|VOPT|dA141H5.1	29861	29861	D3YTA8:Q9BU40	NP_001137453.1:NP_001137454.1:NP_001137455.2:NP_660277.2:XP_005262278.1:XP_005262279.1	Mouse:Chrdl1|
Matrisome-associated	Secreted Factors	CHRDL2	chordin-like 2	BNF1|CHL2|DKFZp586N2124|FKSG37	24168	24168	A8MQ10:H0YCU0:H0YDT1:Q6WN33:Q6WN34	NP_001265402.1:NP_056239.3	Mouse:Chrdl2|
Matrisome-associated	Secreted Factors	CLCF1	cardiotrophin-like cytokine factor 1	BSF-3|BSF3|CISS2|CLC|NNT-1|NNT1|NR6	17412	17412	Q9UBD9	NP_001159684.1:NP_037378.1	Mouse:Clcf1|
Matrisome-associated	Secreted Factors	CNTF	ciliary neurotrophic factor	HCNTF	2169	2169	P26441	NP_000605.1	Mouse:Cntf|
Matrisome-associated	Secreted Factors	CRHBP	corticotropin releasing hormone binding protein	CRF-BP|CRFBP	2356	2356	D6RHH7:P24387	NP_001873.2	Mouse:Crhbp|
Matrisome-associated	Secreted Factors	CRLF1	cytokine receptor-like factor 1	CISS|CISS1|CLF|CLF-1|NR6|zcytor5	2364	2364	M0QZL6:O75462	NP_004741.1	Mouse:Crlf1|
Matrisome-associated	Secreted Factors	CRLF3	cytokine receptor-like factor 3	CREME9|CYTOR4|FRWS|MGC20661	17177	17177	B4DJU5:J3KST8:J3QLS9:Q8IUI8	NP_057070.3	Mouse:Crlf3|
Matrisome-associated	Secreted Factors	CRNN	cornulin	C1orf10|DRC1|PDRC1|SEP53	1230	1230	Q9UBG3	NP_057274.1:XP_006711409.1	Mouse:Crnn|
Matrisome-associated	Secreted Factors	CSF1	colony stimulating factor 1 (macrophage)	MCSF|MGC31930	2432	2432	E9PJA2:E9PKP4:E9PQ08:H7BY18:P09603	NP_000748.3:NP_757349.1:NP_757350.1:NP_757351.1	Mouse:Csf1|
Matrisome-associated	Secreted Factors	CSF2	colony stimulating factor 2 (granulocyte-macrophage)	GMCSF|MGC131935|MGC138897	2434	2434	P04141	NP_000749.2	Mouse:Csf2|
Matrisome-associated	Secreted Factors	CSF3	colony stimulating factor 3 (granulocyte)	C17orf33|CSF3OS|G-CSF|GCSF|MGC45931	2438	2438	J3KTH8:J3QRD4:J3QRX2:P09919:Q8N4W3	NP_000750.1:NP_001171618.1:NP_757373.1:NP_757374.2	Mouse:Csf3|
Matrisome-associated	Secreted Factors	CSH1	chorionic somatomammotropin hormone 1 (placental lactogen)	CSA|CSH2|CSMT|FLJ75407|PL	2440	2440	A6NFB4:B1A4H2:P0DML2	NP_001308.1	Mouse:Prl3d1|
Matrisome-associated	Secreted Factors	CSH2	chorionic somatomammotropin hormone 2	CS-2|CSB|hCS-B	2441	2441	A6NIT4:B1A4H9:H0YM39:P0DML3	NP_072170.1:NP_072171.1	Mouse:Prl3b1|
Matrisome-associated	Secreted Factors	CSHL1	chorionic somatomammotropin hormone-like 1	CS-5|CSHP1|CSL|MGC149868|hCS-L	2442	2442	H0YKQ4:H7C3R7:J3QT06:Q14406	NP_072101.1:NP_072102.1:NP_072103.1
Matrisome-associated	Secreted Factors	CTF1	cardiotrophin 1	CT-1|CT1	2499	2499	Q16619	NP_001136016.1:NP_001321.1	Mouse:Ctf1|
Matrisome-associated	Secreted Factors	CX3CL1	chemokine (C-X3-C motif) ligand 1	ABCD-3|C3Xkine|CXC3|CXC3C|NTN|NTT|SCYD1|fractalkin	10647	10647	H3BSR6:H3BV86:J3QRA1:P78423	NP_002987.1	Mouse:Cx3cl1|
Matrisome-associated	Secreted Factors	CXCL1	chemokine (C-X-C motif) ligand 1 (melanoma growth stimulating activity, alpha)	FSP|GRO1|GROa|MGSA|MGSA-a|NAP-3|SCYB1	4602	4602	P09341	NP_001502.1	Mouse:Cxcl1|
Matrisome-associated	Secreted Factors	CXCL10	chemokine (C-X-C motif) ligand 10	C7|IFI10|INP10|IP-10|SCYB10|crg-2|gIP-10|mob-1	10637	10637	P02778	NP_001556.2	Mouse:Cxcl10|
Matrisome-associated	Secreted Factors	CXCL11	chemokine (C-X-C motif) ligand 11	H174|I-TAC|IP-9|IP9|MGC102770|SCYB11|SCYB9B|b-R1	10638	10638	O14625	NP_005400.1	Mouse:Cxcl11|
Matrisome-associated	Secreted Factors	CXCL12	chemokine (C-X-C motif) ligand 12 (stromal cell-derived factor 1)	PBSF|SCYB12|SDF-1a|SDF-1b|SDF1|SDF1A|SDF1B|TLSF-a|	10672	10672	P48061	NP_000600.1:NP_001029058.1:NP_001171605.1:NP_001264919.1:NP_954637.1	Mouse:Cxcl12|
Matrisome-associated	Secreted Factors	CXCL13	chemokine (C-X-C motif) ligand 13	ANGIE|ANGIE2|BCA-1|BCA1|BLC|BLR1L|SCYB13	10639	10639	O43927	NP_006410.1:XP_006714126.1	Mouse:Cxcl13|
Matrisome-associated	Secreted Factors	CXCL14	chemokine (C-X-C motif) ligand 14	BMAC|BRAK|KEC|KS1|MGC10687|MIP-2g|MIP2G|NJAC|SCYB1	10640	10640	O95715	NP_004878.2	Mouse:Cxcl14|
Matrisome-associated	Secreted Factors	CXCL2	chemokine (C-X-C motif) ligand 2	CINC-2a|GRO2|GROb|MGSA-b|MIP-2a|MIP2|MIP2A|SCYB2	4603	4603	P19875	NP_002080.1	Mouse:Cxcl2|
Matrisome-associated	Secreted Factors	CXCL3	chemokine (C-X-C motif) ligand 3	CINC-2b|GRO3|GROg|MIP-2b|MIP2B|SCYB3	4604	4604	P19876	NP_002081.2	Mouse:Cxcl3|
Matrisome-associated	Secreted Factors	CXCL5	chemokine (C-X-C motif) ligand 5	ENA-78|SCYB5	10642	10642	P42830	NP_002985.1	Mouse:Cxcl5|
Matrisome-associated	Secreted Factors	CXCL6	chemokine (C-X-C motif) ligand 6 (granulocyte chemotactic protein 2)	CKA-3|GCP-2|GCP2|SCYB6	10643	10643	D6RF92:P80162	NP_002984.1
Matrisome-associated	Secreted Factors	CXCL8	interleukin 8	CXCL8|GCP-1|GCP1|LECT|LUCT|LYNAP|MDNCF|MONAP|NAF|NAP-1|NAP1|IL8	6025	6025	C9J4T6:P10145	NP_000575.1
Matrisome-associated	Secreted Factors	CXCL9	chemokine (C-X-C motif) ligand 9	CMK|Humig|MIG|SCYB9|crg-10	7098	7098	Q07325	NP_002407.1	Mouse:Cxcl9|
Matrisome-associated	Secreted Factors	DHH	desert hedgehog homolog (Drosophila)	HHG-3|MGC35145	2865	2865	O43323	NP_066382.1	Mouse:Dhh|
Matrisome-associated	Secreted Factors	EBI3	Epstein-Barr virus induced 3	IL27B	3129	3129	Q14213	NP_005746.2	Mouse:Ebi3|
Matrisome-associated	Secreted Factors	EDA	ectodysplasin A	ED1|ED1-A1|ED1-A2|EDA1|EDA2|HED|STHAGX1|XHED|XLHED	3157	3157	D6RA95:Q92838	NP_001005609.1:NP_001005610.2:NP_001005612.2:NP_001005613.1:NP_001390.1	Mouse:Eda|
Matrisome-associated	Secreted Factors	EGF	epidermal growth factor (beta-urogastrone)	HOMG4|URG	3229	3229	P01133	NP_001171601.1:NP_001171602.1:NP_001954.2	Mouse:Egf|
Matrisome-associated	Secreted Factors	EGFL6	EGF-like-domain, multiple 6	DKFZp564P2063|MAEG|W80	3235	3235	Q8IUX8	NP_001161362.1:NP_056322.2	Mouse:Egfl6|
Matrisome-associated	Secreted Factors	EGFL7	EGF-like-domain, multiple 7	MGC111117|RP11-251M1.2|VE-STATIN|ZNEU1	20594	20594	Q9UHF1:R4GMT3	NP_057299.1:NP_958854.1	Mouse:Egfl7|
Matrisome-associated	Secreted Factors	EGFL8	EGF-like-domain, multiple 8	C6orf8|FLJ44493|MGC44938|MGC59719|NG3	13944	13944	Q5JP22:Q99944	NP_085155.1	Mouse:Egfl8|
Matrisome-associated	Secreted Factors	EPGN	epithelial mitogen homolog (mouse)	ALGV3072|EPG|FLJ75542|PRO9904|epigen	17470	17470	A0PK19:H3BM13:Q6UW88	NP_001257918.1:NP_001257919.1:NP_001257920.1:NP_001257921.1:NP_001257922.1:XP_005265723.1	Mouse:Epgn|
Matrisome-associated	Secreted Factors	EPO	erythropoietin	EP|MGC138142|MVCD2	3415	3415	P01588	NP_000790.2	Mouse:Epo|
Matrisome-associated	Secreted Factors	EREG	epiregulin	ER	3443	3443	O14944	NP_001423.1	Mouse:Ereg|
Matrisome-associated	Secreted Factors	FASLG	Fas ligand (TNF superfamily, member 6)	APT1LG1|CD178|CD95L|FASL|TNFSF6	11936	11936	P48023	NP_000630.1	Mouse:Fasl|
Matrisome-associated	Secreted Factors	FGF1	fibroblast growth factor 1 (acidic)	AFGF|ECGF|ECGF-beta|ECGFA|ECGFB|FGF-alpha|FGFA|GLI	3665	3665	B5MCF4:C9JDC5:C9JUP6:P05230	NP_000791.1:NP_001138364.1:NP_001138406.1:NP_001138407.1:NP_001244134.1:NP_001244136.1:NP_001244137.1:NP_001244138.1:NP_001244139.1:NP_149127.1:NP_149128.1	Mouse:Fgf1|
Matrisome-associated	Secreted Factors	FGF10	fibroblast growth factor 10	-	3666	3666	D6RG33:O15520	NP_004456.1:XP_005248321.1	Mouse:Fgf10|
Matrisome-associated	Secreted Factors	FGF11	fibroblast growth factor 11	FHF3|FLJ16061|MGC102953|MGC45269	3667	3667	I3L4N4:Q92914	NP_004103.1	Mouse:Fgf11|
Matrisome-associated	Secreted Factors	FGF12	fibroblast growth factor 12	FGF12B|FHF1	3668	3668	C9JEN8:C9JIN3:C9JUK8:H7C1L8:P61328	NP_004104.3:NP_066360.1	Mouse:Fgf12|
Matrisome-associated	Secreted Factors	FGF13	fibroblast growth factor 13	FGF2|FHF-2|FHF2	3670	3670	B1AJW0:B1AK17:B1B1H9:Q92913	NP_001132970.1:NP_001132972.1:NP_001132973.1:NP_001132974.1:NP_004105.1:NP_378668.1:XP_005262456.1	Mouse:Fgf13|
Matrisome-associated	Secreted Factors	FGF14	fibroblast growth factor 14	FHF4|MGC119129|SCA27	3671	3671	Q92915	NP_004106.1:NP_787125.1	Mouse:Fgf14|
Matrisome-associated	Secreted Factors	FGF16	fibroblast growth factor 16	-	3672	3672	H0Y5L6:O43320	NP_003859.1	Mouse:Fgf16|
Matrisome-associated	Secreted Factors	FGF17	fibroblast growth factor 17	FGF-13	3673	3673	O60258	NP_003858.1:XP_005273733.1	Mouse:Fgf17|
Matrisome-associated	Secreted Factors	FGF18	fibroblast growth factor 18	FGF-18|ZFGF5	3674	3674	O76093	NP_003853.1	Mouse:Fgf18|
Matrisome-associated	Secreted Factors	FGF19	fibroblast growth factor 19	-	3675	3675	O95750	NP_005108.1	Mouse:Fgf15|
Matrisome-associated	Secreted Factors	FGF2	fibroblast growth factor 2 (basic)	BFGF|FGFB|HBGF-2	3676	3676	P09038	NP_001997.5	Mouse:Fgf2|
Matrisome-associated	Secreted Factors	FGF20	fibroblast growth factor 20	-	3677	3677	H0YAT9:Q9NP95	NP_062825.1	Mouse:Fgf20|
Matrisome-associated	Secreted Factors	FGF21	fibroblast growth factor 21	-	3678	3678	Q9NSA1	NP_061986.1:XP_005258788.1	Mouse:Fgf21|
Matrisome-associated	Secreted Factors	FGF22	fibroblast growth factor 22	-	3679	3679	K7ELB9:O60371:Q9HCT0	NP_065688.1:XP_005259595.1	Mouse:Fgf22|
Matrisome-associated	Secreted Factors	FGF23	fibroblast growth factor 23	ADHR|HPDR2|HYPF|PHPTC	3680	3680	Q9GZV9	NP_065689.1	Mouse:Fgf23|
Matrisome-associated	Secreted Factors	FGF3	fibroblast growth factor 3 (murine mammary tumor virus integration site (v-int-2) oncogene homolog)	HBGF-3|INT2	3681	3681	P11487	NP_005238.1	Mouse:Fgf3|
Matrisome-associated	Secreted Factors	FGF4	fibroblast growth factor 4	HBGF-4|HST|HST-1|HSTF1|K-FGF|KFGF	3682	3682	P08620	NP_001998.1:XP_005273904.1:XP_006718538.1	Mouse:Fgf4|
Matrisome-associated	Secreted Factors	FGF5	fibroblast growth factor 5	HBGF-5|Smag-82	3683	3683	H0Y9E2:P12034	NP_004455.2:NP_149134.1	Mouse:Fgf5|
Matrisome-associated	Secreted Factors	FGF6	fibroblast growth factor 6	HBGF-6|HST2	3684	3684	H0YGZ9:P10767	NP_066276.2	Mouse:Fgf6|
Matrisome-associated	Secreted Factors	FGF7	fibroblast growth factor 7 (keratinocyte growth factor)	HBGF-7|KGF	3685	3685	H0YNE7:P21781	NP_002000.1	Mouse:Fgf7|
Matrisome-associated	Secreted Factors	FGF8	fibroblast growth factor 8 (androgen-induced)	AIGF|HBGF-8|KAL6|MGC149376	3686	3686	P55075:R4GMQ3	NP_006110.1:NP_149353.1:NP_149354.1:NP_149355.1	Mouse:Fgf8|
Matrisome-associated	Secreted Factors	FGF9	fibroblast growth factor 9 (glia-activating factor)	GAF|HBFG-9|MGC119914|MGC119915|SYNS3	3687	3687	P31371	NP_002001.1	Mouse:Fgf9|
Matrisome-associated	Secreted Factors	FGFBP1	fibroblast growth factor binding protein 1	FGFBP|HBP17	19695	19695	Q14512	NP_005121.1	Mouse:Fgfbp1|
Matrisome-associated	Secreted Factors	FGFBP2	fibroblast growth factor binding protein 2	HBP17RP|KSP37	29451	29451	Q9BYJ0	NP_114156.1
Matrisome-associated	Secreted Factors	FGFBP3	fibroblast growth factor binding protein 3	C10orf13|FGF-BP3|MGC39320	23428	23428	Q8TAT2	NP_689642.3	Mouse:Fgfbp3|
Matrisome-associated	Secreted Factors	FIGF	c-fos induced growth factor (vascular endothelial growth factor D)	VEGF-D|VEGFD	3708	3708	O43915	NP_004460.1	Mouse:Figf|
Matrisome-associated	Secreted Factors	FLG	filaggrin	ATOD2	3748	3748	P20930	NP_002007.1	Mouse:Flg|
Matrisome-associated	Secreted Factors	FLG2	filaggrin family member 2	IFPS	33276	33276	Q5D862	NP_001014364.1	Mouse:Flg2|
Matrisome-associated	Secreted Factors	FLT3LG	fms-related tyrosine kinase 3 ligand	FL	3766	3766	M0QXI0:M0QYM9:M0R2K0:M0R3A6:P49771	NP_001191431.1:NP_001191432.1:NP_001265566.1:NP_001265567.1:NP_001450.2:XP_006723180.1	Mouse:Flt3l|
Matrisome-associated	Secreted Factors	FRZB	frizzled-related protein	FRE|FRITZ|FRP-3|FRZB-1|FRZB-PEN|FRZB1|FZRB|OS1|SFR	3959	3959	Q92765	NP_001454.2	Mouse:Frzb|
Matrisome-associated	Secreted Factors	FST	follistatin	FS	3971	3971	H0YA75:H0YAF9:P19883	NP_006341.1:NP_037541.1	Mouse:Fst|
Matrisome-associated	Secreted Factors	FSTL1	follistatin-like 1	FLJ50214|FLJ52277|FRP|FSL1	3972	3972	C9J5G4:H7C4W4:Q12841	NP_009016.1	Mouse:Fstl1|
Matrisome-associated	Secreted Factors	FSTL3	follistatin-like 3 (secreted glycoprotein)	FLRG|FSRP	3973	3973	K7EM71:K7ES54:O95633	NP_005851.1	Mouse:Fstl3|
Matrisome-associated	Secreted Factors	GDF1	growth differentiation factor 1	-	4214	4214	P27539	NP_001483.3	Mouse:Gdf1|
Matrisome-associated	Secreted Factors	GDF10	growth differentiation factor 10	BMP-3b|BMP3B	4215	4215	P55107	NP_004953.1	Mouse:Gdf10|
Matrisome-associated	Secreted Factors	GDF11	growth differentiation factor 11	BMP-11|BMP11	4216	4216	H0YI30:O95390	NP_005802.1:XP_006719256.1:XP_006719257.1	Mouse:Gdf11|
Matrisome-associated	Secreted Factors	GDF15	growth differentiation factor 15	GDF-15|MIC-1|MIC1|NAG-1|PDF|PLAB|PTGFB	30142	30142	Q99988	NP_004855.2	Mouse:Gdf15|
Matrisome-associated	Secreted Factors	GDF2	growth differentiation factor 2	BMP-9|BMP9	4217	4217	Q9UK05	NP_057288.1	Mouse:Gdf2|
Matrisome-associated	Secreted Factors	GDF3	growth differentiation factor 3	-	4218	4218	Q9NR23	NP_065685.1	Mouse:Gdf3|
Matrisome-associated	Secreted Factors	GDF5	growth differentiation factor 5	BMP14|CDMP1|LAP4|OS5|SYNS2	4220	4220	P43026	NP_000548.2	Mouse:Gdf5|
Matrisome-associated	Secreted Factors	GDF6	growth differentiation factor 6	BMP13|CDMP2|KFS|KFSL|MCOP4|MGC158100|MGC158101|SCD	4221	4221	Q6KF10	NP_001001557.1	Mouse:Gdf6|
Matrisome-associated	Secreted Factors	GDF7	growth differentiation factor 7	BMP12	4222	4222	Q7Z4P5	NP_878248.2	Mouse:Gdf7|
Matrisome-associated	Secreted Factors	GDF9	growth differentiation factor 9	-	4224	4224	O60383	NP_001275753.1:NP_005251.1	Mouse:Gdf9|
Matrisome-associated	Secreted Factors	GDNF	glial cell derived neurotrophic factor	ATF1|ATF2|HFB1-GDNF	4232	4232	P39905	NP_000505.1:NP_001177397.1:NP_001177398.1:NP_001265027.1:NP_954701.1	Mouse:Gdnf|
Matrisome-associated	Secreted Factors	GH1	growth hormone 1	GH|GH-N|GHN|IGHD1B|hGH-N	4261	4261	B1A4G9:P01241	NP_000506.2:NP_072053.1:NP_072054.1:XP_005257275.1:XP_005257276.1:NP_072055.1	Mouse:Gh|
Matrisome-associated	Secreted Factors	GH2	growth hormone 2	GH-V|GHL|GHV|hGH-V	4262	4262	P01242	NP_002050.1:NP_072050.1:NP_072051.1:NP_072052.1
Matrisome-associated	Secreted Factors	HBEGF	heparin-binding EGF-like growth factor	DTR|DTS|DTSF|HEGFL	3059	3059	Q99075	NP_001936.1	Mouse:Hbegf|
Matrisome-associated	Secreted Factors	HCFC1	host cell factor C1 (VP16-accessory protein)	CFF|HCF-1|HCF1|HFC1|MGC70925|VCAF	4839	4839	A6NEM2:H7C1C4:P51610	NP_005325.2:XP_006724879.1:XP_006724878.1	Mouse:Hcfc1|
Matrisome-associated	Secreted Factors	HCFC2	host cell factor C2	FLJ94012|HCF-2|HCF2	24972	24972	C0H5X3:F8VU09:Q9Y5Z7	NP_037452.1	Mouse:Hcfc2|
Matrisome-associated	Secreted Factors	HGF	hepatocyte growth factor (hepapoietin A; scatter factor)	DFNB39|F-TCF|HGFB|HPTA|SF	4893	4893	C9JDP4:C9JJ35:C9JS80:C9WSJ3:P14210	NP_000592.3:NP_001010931.1:NP_001010932.1:NP_001010933.1:NP_001010934.1:XP_006716019.1	Mouse:Hgf|
Matrisome-associated	Secreted Factors	HGFAC	HGF activator	HGFA|MGC138395|MGC138397	4894	4894	D6RAR4:Q04756	NP_001519.1:XP_005248023.1	Mouse:Hgfac|
Matrisome-associated	Secreted Factors	HHIP	hedgehog interacting protein	FLJ20992|FLJ90230|HIP	14866	14866	Q96QV1	NP_071920.1	Mouse:Hhip|
Matrisome-associated	Secreted Factors	HRNR	hornerin	S100A16|S100a18	20846	20846	Q86YZ3	NP_001009931.1	Mouse:Hrnr|
Matrisome-associated	Secreted Factors	IFNA1	interferon, alpha 1	IFL|IFN|IFN-ALPHA|IFNA13|IFNA@|MGC138207|MGC138505	5417	5417	P01562	NP_008831.3:NP_076918.1
Matrisome-associated	Secreted Factors	IFNA10	interferon, alpha 10	MGC119878|MGC119879	5418	5418	P01566	NP_002162.1
Matrisome-associated	Secreted Factors	IFNA13	interferon, alpha 13	IFNA1	5419	5419	E9PB07:P01562	NP_008831.3:NP_008831.3:NP_076918.1	Mouse:Ifna13|
Matrisome-associated	Secreted Factors	IFNA14	interferon, alpha 14	LEIF2H|MGC125756|MGC125757	5420	5420	P01570	NP_002163.2
Matrisome-associated	Secreted Factors	IFNA16	interferon, alpha 16	-	5421	5421	P05015	NP_002164.1
Matrisome-associated	Secreted Factors	IFNA17	interferon, alpha 17	IFNA|INFA|LEIF2C1	5422	5422	P01571	NP_067091.1
Matrisome-associated	Secreted Factors	IFNA2	interferon, alpha 2	IFNA|INFA2|MGC125764|MGC125765	5423	5423	P01563	NP_000596.2
Matrisome-associated	Secreted Factors	IFNA21	interferon, alpha 21	MGC126687|MGC126689	5424	5424	P01568	NP_002166.2
Matrisome-associated	Secreted Factors	IFNA4	interferon, alpha 4	INFA4|MGC142200	5425	5425	P05014	NP_066546.1
Matrisome-associated	Secreted Factors	IFNA5	interferon, alpha 5	INFA5	5426	5426	P01569	NP_002160.1
Matrisome-associated	Secreted Factors	IFNA6	interferon, alpha 6	-	5427	5427	P05013	NP_066282.1
Matrisome-associated	Secreted Factors	IFNA7	interferon, alpha 7	IFNA-J	5428	5428	P01567	NP_066401.2
Matrisome-associated	Secreted Factors	IFNA8	interferon, alpha 8	-	5429	5429	P32881	NP_002161.2
Matrisome-associated	Secreted Factors	IFNB1	interferon, beta 1, fibroblast	IFB|IFF|IFNB|MGC96956	5434	5434	P01574	NP_002167.1	Mouse:Ifnb1|
Matrisome-associated	Secreted Factors	IFNE	interferon, epsilon	IFN-E|IFNE1|IFNT1|MGC119018|MGC119020|PRO655	18163	18163	Q86WN2	NP_795372.1	Mouse:Ifne|
Matrisome-associated	Secreted Factors	IFNG	interferon, gamma	IFG|IFI	5438	5438	P01579	NP_000610.2	Mouse:Ifng|
Matrisome-associated	Secreted Factors	IFNK	interferon, kappa	RP11-27J8.1	21714	21714	Q9P0W0	NP_064509.2	Mouse:Ifnk|
Matrisome-associated	Secreted Factors	IFNW1	interferon, omega 1	-	5448	5448	P05000	NP_002168.1
Matrisome-associated	Secreted Factors	IGF1	insulin-like growth factor 1 (somatomedin C)	IGF1A|IGFI	5464	5464	P05019:Q13429	NP_000609.1:NP_001104754.1:NP_001104755.1:NP_001104753.1	Mouse:Igf1|
Matrisome-associated	Secreted Factors	IGF2	insulin-like growth factor 2 (somatomedin A)	C11orf43|FLJ22066|FLJ44734|INSIGF|pp9974	5466	5466	P01344	NP_000603.1:NP_001007140.2:NP_001121070.1:NP_001278790.1:NP_001278791.1	Mouse:Igf2|
Matrisome-associated	Secreted Factors	IHH	Indian hedgehog homolog (Drosophila)	BDA1|HHG2	5956	5956	Q14623	NP_002172.2	Mouse:Ihh|
Matrisome-associated	Secreted Factors	IL10	interleukin 10	CSIF|IL-10|IL10A|MGC126450|MGC126451|TGIF	5962	5962	P22301	NP_000563.1	Mouse:Il10|
Matrisome-associated	Secreted Factors	IL11	interleukin 11	AGIF|IL-11	5966	5966	K7ESD5:P20809	NP_000632.1:NP_001254647.1	Mouse:Il11|
Matrisome-associated	Secreted Factors	IL12A	interleukin 12A (natural killer cell stimulatory factor 1, cytotoxic lymphocyte maturation factor 1, p35)	CLMF|IL-12A|NFSK|NKSF1|P35	5969	5969	E7ENE1:E9PGR3:P29459	NP_000873.2:XP_005247492.1	Mouse:Il12a|
Matrisome-associated	Secreted Factors	IL12B	interleukin 12B (natural killer cell stimulatory factor 2, cytotoxic lymphocyte maturation factor 2, p40)	CLMF|CLMF2|IL-12B|NKSF|NKSF2	5970	5970	P29460	NP_002178.2	Mouse:Il12b|
Matrisome-associated	Secreted Factors	IL13	interleukin 13	ALRH|BHR1|IL-13|MGC116786|MGC116788|MGC116789|P600	5973	5973	P35225	NP_002179.2	Mouse:Il13|
Matrisome-associated	Secreted Factors	IL15	interleukin 15	IL-15|MGC9721	5977	5977	P40933	NP_000576.1:NP_751915.1	Mouse:Il15|
Matrisome-associated	Secreted Factors	IL16	interleukin 16 (lymphocyte chemoattractant factor)	FLJ16806|FLJ42735|FLJ44234|LCF|NIL16|PRIL16|prIL-1	5980	5980	H0YKB7:H0YLB1:H0YLH9:H0YLL1:H3BN12:H3BT15:H3BVH5:Q14005	NP_001165599.1:NP_004504.3:NP_757366.2:XP_005254403.1	Mouse:Il16|
Matrisome-associated	Secreted Factors	IL17A	interleukin 17A	CTLA8|IL-17|IL-17A|IL17	5981	5981	Q16552	NP_002181.1	Mouse:Il17a|
Matrisome-associated	Secreted Factors	IL17B	interleukin 17B	IL-17B|IL-20|MGC138900|MGC138901|ZCYTO7	5982	5982	Q9UHF5	NP_055258.1	Mouse:Il17b|
Matrisome-associated	Secreted Factors	IL17C	interleukin 17C	CX2|IL-17C|IL-21|MGC126884|MGC138401	5983	5983	Q9P0M4	NP_037410.1	Mouse:Il17c|
Matrisome-associated	Secreted Factors	IL17D	interleukin 17D	FLJ30846|IL-17D|IL-22|IL-27|IL27	5984	5984	Q8TAD2	NP_612141.1	Mouse:Il17d|
Matrisome-associated	Secreted Factors	IL17F	interleukin 17F	IL-17F|ML-1|ML1	16404	16404	Q96PD4	NP_443104.1	Mouse:Il17f|
Matrisome-associated	Secreted Factors	IL18	interleukin 18 (interferon-gamma-inducing factor)	IGIF|IL-18|IL-1g|IL1F4|MGC12320	5986	5986	Q14116	NP_001230140.1:NP_001553.1	Mouse:Il18|
Matrisome-associated	Secreted Factors	IL19	interleukin 19	IL-10C|MDA1|NG.1|ZMDA1	5990	5990	Q9UHD0	NP_037503.2:NP_715639.1	Mouse:Il19|
Matrisome-associated	Secreted Factors	IL1A	interleukin 1, alpha	IL-1A|IL1|IL1-ALPHA|IL1F1	5991	5991	P01583	NP_000566.3	Mouse:Il1a|
Matrisome-associated	Secreted Factors	IL1B	interleukin 1, beta	IL-1|IL1-BETA|IL1F2	5992	5992	C9JSC2:C9JVK0:C9JWV2:P01584	NP_000567.1	Mouse:Il1b|
Matrisome-associated	Secreted Factors	IL1F10	interleukin 1 family, member 10 (theta)	FIL1-theta|FKSG75|IL-1HY2|IL1-theta|MGC119831|MGC1	15552	15552	H7BXV3:Q8WWZ1	NP_115945.4:NP_775184.1	Mouse:Il1f10|
Matrisome-associated	Secreted Factors	IL1F5	interleukin 1 family, member 5 (delta)	FIL1|FIL1(DELTA)|FIL1D|IL1HY1|IL1L1|IL1RP3|MGC2984	15561	15561	C9JTH1:Q9UBH0:U3KPW9	NP_036407.1:NP_775262.1:XP_005263695.1	Mouse:Il1f5|
Matrisome-associated	Secreted Factors	IL1F6	interleukin 1 family, member 6 (epsilon)	FIL1|FIL1(EPSILON)|FIL1E|IL-1F6|IL1(EPSILON)|MGC12	15562	15562	Q9UHA7	NP_055255.1:XP_005263696.1	Mouse:Il1f6|
Matrisome-associated	Secreted Factors	IL1F7	interleukin 1 family, member 7 (zeta)	FIL1|FIL1(ZETA)|FIL1Z|IL-1F7|IL-1H4|IL-1RP1|IL1H4|	15563	15563	Q9NZH6	NP_055254.2:NP_775294.1:NP_775295.1:NP_775296.1:NP_775297.1
Matrisome-associated	Secreted Factors	IL1F8	interleukin 1 family, member 8 (eta)	FIL1|FIL1-(ETA)|FIL1H|IL-1F8|IL-1H2|IL1-ETA|IL1H2|	15564	15564	Q9NZH7	NP_055253.2:NP_775270.1	Mouse:Il1f8|
Matrisome-associated	Secreted Factors	IL1F9	interleukin 1 family, member 9	IL-1F9|IL-1H1|IL-1RP2|IL1E|IL1H1|IL1RP2	15741	15741	C9J681:Q9NZH8	NP_001265497.1:NP_062564.1	Mouse:Il1f9|
Matrisome-associated	Secreted Factors	IL1RN	interleukin 1 receptor antagonist	DIRA|ICIL-1RA|IL-1ra3|IL1F3|IL1RA|IRAP|MGC10430|MV	6000	6000	P18510	NP_000568.1:NP_776213.1:NP_776214.1:NP_776215.1:XP_005263718.1:XP_006712560.1	Mouse:Il1rn|
Matrisome-associated	Secreted Factors	IL2	interleukin 2	IL-2|TCGF|lymphokine	6001	6001	P60568	NP_000577.2	Mouse:Il2|
Matrisome-associated	Secreted Factors	IL20	interleukin 20	IL-20|IL10D|MGC96907|ZCYTO10	6002	6002	Q9NYY1	NP_061194.2:XP_005273210.1	Mouse:Il20|
Matrisome-associated	Secreted Factors	IL22	interleukin 22	IL-21|IL-22|IL-D110|IL-TIF|IL21|ILTIF|MGC79382|MGC	14900	14900	Q9GZX6	NP_065386.1:XP_005268986.1	Mouse:Il22|
Matrisome-associated	Secreted Factors	IL23A	interleukin 23, alpha subunit p19	IL-23|IL-23A|IL23P19|MGC79388|P19|SGRF	15488	15488	Q9NPF7	NP_057668.1	Mouse:Il23a|
Matrisome-associated	Secreted Factors	IL24	interleukin 24	C49A|FISP|IL-24|IL10B|MDA7|Mob-5|ST16|mda-7	11346	11346	E7ER64:E7ETP6:Q13007	NP_001172085.1:NP_001172086.1:NP_001172087.1:NP_006841.1	Mouse:Il24|
Matrisome-associated	Secreted Factors	IL25	interleukin 25	IL17E	13765	13765	Q9H293	NP_073626.1:NP_758525.1	Mouse:Il25|
Matrisome-associated	Secreted Factors	IL26	interleukin 26	AK155|IL-26	17119	17119	Q9NPH9	NP_060872.1
Matrisome-associated	Secreted Factors	IL3	interleukin 3 (colony-stimulating factor, multiple)	IL-3|MCGF|MGC79398|MGC79399|MULTI-CSF	6011	6011	P08700	NP_000579.2	Mouse:Il3|
Matrisome-associated	Secreted Factors	IL34	interleukin 34	C16orf77|IL-34|MGC34647	28529	28529	H3BPB7:J3QQT3:Q6ZMJ4	NP_001166242.1:NP_001166243.1:NP_689669.2	Mouse:Il34|
Matrisome-associated	Secreted Factors	IL4	interleukin 4	BCGF-1|BCGF1|BSF1|IL-4|MGC79402	6014	6014	P05112	NP_000580.1:NP_758858.1	Mouse:Il4|
Matrisome-associated	Secreted Factors	IL5	interleukin 5 (colony-stimulating factor, eosinophil)	EDF|IL-5|TRF	6016	6016	C9JQP9:P05113	NP_000870.1	Mouse:Il5|
Matrisome-associated	Secreted Factors	IL6	interleukin 6 (interferon, beta 2)	BSF2|HGF|HSF|IFNB2|IL-6	6018	6018	B4DNQ5:B4DNV3:B5MC14:B5MC21:B5MCZ3:C9J5B0:P05231	NP_000591.1:XP_005249802.1	Mouse:Il6|
Matrisome-associated	Secreted Factors	IL7	interleukin 7	IL-7	6023	6023	P13232:Q5FBY3:Q5FBY6	NP_000871.1:NP_001186815.1:NP_001186816.1:NP_001186817.1	Mouse:Il7|
Matrisome-associated	Secreted Factors	IL9	interleukin 9	HP40|IL-9|P40	6029	6029	P15248	NP_000581.1	Mouse:Il9|
Matrisome-associated	Secreted Factors	INHA	inhibin, alpha	-	6065	6065	P05111	NP_002182.1	Mouse:Inha|
Matrisome-associated	Secreted Factors	INHBA	inhibin, beta A	EDF|FRP	6066	6066	P08476	NP_002183.1	Mouse:Inhba|
Matrisome-associated	Secreted Factors	INHBB	inhibin, beta B	MGC157939	6067	6067	P09529	NP_002184.2	Mouse:Inhbb|
Matrisome-associated	Secreted Factors	INHBC	inhibin, beta C	IHBC	6068	6068	P55103	NP_005529.1	Mouse:Inhbc|
Matrisome-associated	Secreted Factors	INHBE	inhibin, beta E	MGC4638	24029	24029	F8VNP4:P58166	NP_113667.1	Mouse:Inhbe|
Matrisome-associated	Secreted Factors	INS	insulin	ILPR|IRDN	6081	6081	A6XGL2:C9JNR5:P01308	NP_000198.1:NP_001172026.1:NP_001172027.1:NP_001278826.1	Mouse:Ins2|
Matrisome-associated	Secreted Factors	INS-IGF2	INS-IGF2 readthrough transcript	-	33527	33527	F8WCM5	NP_001035835.1
Matrisome-associated	Secreted Factors	INSL3	insulin-like 3 (Leydig cell)	MGC119818|MGC119819|RLF|RLNL	6086	6086	M0QXQ3:P51460	NP_001252516.1:NP_005534.2	Mouse:Insl3|
Matrisome-associated	Secreted Factors	INSL5	insulin-like 5	MGC126695|MGC126697|PRO182|UNQ156	6088	6088	Q9Y5Q6	NP_005469.2	Mouse:Insl5|
Matrisome-associated	Secreted Factors	INSL6	insulin-like 6	RIF1	6089	6089	Q9Y581	NP_009110.2	Mouse:Insl6|
Matrisome-associated	Secreted Factors	ISM1	isthmin 1 homolog (zebrafish)	C20orf82|ISM|Isthmin|bA149I18.1|dJ1077I2.1	16213	16213	B1AKI9	NP_543016.1	Mouse:Ism1|
Matrisome-associated	Secreted Factors	ISM2	isthmin 2 homolog (zebrafish)	DKFZp686E0215|FLJ32147|MGC119416|TAIL1|THSD3	23176	23176	G3V2Q2:G3XAI3:H7C4M8:H7C5B3:Q6H9L7	NP_872315.2:NP_954993.1	Mouse:Ism2|
Matrisome-associated	Secreted Factors	KITLG	KIT ligand	DKFZp686F2250|FPH2|KL-1|Kitl|MGF|SCF|SF|SHEP7	6343	6343	P21583:S4R384:S4R442	NP_000890.1:NP_003985.2	Mouse:Kitl|
Matrisome-associated	Secreted Factors	LEFTY1	left-right determination factor 1	LEFTB|LEFTYB	6552	6552	O75610	NP_066277.1	Mouse:Lefty1|
Matrisome-associated	Secreted Factors	LEFTY2	left-right determination factor 2	EBAF|LEFTA|LEFTYA|MGC46222|TGFB4	3122	3122	O00292	NP_001165896.1:NP_003231.2	Mouse:Lefty2|
Matrisome-associated	Secreted Factors	LEP	leptin	FLJ94114|OB|OBS	6553	6553	P41159	NP_000221.1:XP_005250397.1	Mouse:Lep|
Matrisome-associated	Secreted Factors	LIF	leukemia inhibitory factor (cholinergic differentiation factor)	CDF|DIA|HILDA	6596	6596	P15018	NP_001244064.1:NP_002300.1:XP_006724303.1	Mouse:Lif|
Matrisome-associated	Secreted Factors	LTA	lymphotoxin alpha (TNF superfamily, member 1)	LT|TNFB|TNFSF1	6709	6709	P01374	NP_000586.2:NP_001153212.1	Mouse:Lta|
Matrisome-associated	Secreted Factors	LTB	lymphotoxin beta (TNF superfamily, member 3)	TNFC|TNFSF3|p33	6711	6711	Q06643	NP_002332.1:NP_033666.1	Mouse:Ltb|
Matrisome-associated	Secreted Factors	MDK	midkine (neurite growth-promoting factor 2)	FLJ27379|MK|NEGF2	6972	6972	C9JHA4:E9PLM6:E9PPJ5:P21741	NP_001012333.1:NP_001012334.1:NP_001257479.1:NP_001257480.1:NP_001257481.1:NP_002382.1	Mouse:Mdk|
Matrisome-associated	Secreted Factors	MEGF10	multiple EGF-like-domains 10	DKFZp781K1852|FLJ41574|KIAA1780	29634	29634	Q96KG7	NP_001243474.1:NP_115822.1	Mouse:Megf10|
Matrisome-associated	Secreted Factors	MEGF11	multiple EGF-like-domains 11	DKFZp434L121|KIAA1781	29635	29635	A6BM72:C9JYE7:H3BR81	NP_115821.2	Mouse:Megf11|
Matrisome-associated	Secreted Factors	MEGF6	multiple EGF-like-domains 6	EGFL3|KIAA0815	3232	3232	H7C557:H7C5N9:O75095	NP_001400.3	Mouse:Megf6|
Matrisome-associated	Secreted Factors	MEGF8	multiple EGF-like-domains 8	C19orf49|EGFL4|FLJ22365|MGC120684|MGC138147|SBP1	3233	3233	F5GZG7:M0QZL2:M0R0Q0:Q7Z7M0	NP_001258867.1:NP_001401.2	Mouse:Megf8|
Matrisome-associated	Secreted Factors	MEGF9	multiple EGF-like-domains 9	EGFL5	3234	3234	C9J1K8:Q9H1U4	NP_001073966.2	Mouse:Megf9|
Matrisome-associated	Secreted Factors	MST1	macrophage stimulating 1 (hepatocyte growth factor-like)	D3F15S2|DNF15S2|HGFL|MSP|NF15S2	7380	7380	F5H6L8:G3XAK1:H7C0F8:P26927	NP_066278.3	Mouse:Mst1|
Matrisome-associated	Secreted Factors	MST1L	macrophage stimulating 1 (hepatocyte growth factor-like) pseudogene 9	D1F15S1A|MSPL-7|MSPL7|MSTP7|MSTP9|MST1P9	7390	7390	Q2TV78	NP_001258662.1
Matrisome-associated	Secreted Factors	MSTN	myostatin	GDF8	4223	4223	O14793	NP_005250.1	Mouse:Mstn|
Matrisome-associated	Secreted Factors	NGF	nerve growth factor (beta polypeptide)	Beta-NGF|HSAN5|MGC161426|MGC161428|NGFB	7808	7808	P01138	NP_002497.2:XP_006710726.1:XP_006710727.1:XP_006710728.1	Mouse:Ngf|
Matrisome-associated	Secreted Factors	NODAL	nodal homolog (mouse)	MGC138230	7865	7865	H7C0E4:Q96S42	NP_060525.3	Mouse:Nodal|
Matrisome-associated	Secreted Factors	NRG1	neuregulin 1	ARIA|GGF|GGF2|HGL|HRG|HRG1|HRGA|NDF|SMDF	7997	7997	B7Z1E3:E5RHP6:E5RHQ1:E5RIG8:E7EX30:F8W9E3:H0YBA3:H0YCP0:H0YDC2:H7BXY2:Q02297	NP_001153467.1:NP_001153471.1:NP_001153473.1:NP_001153477.1:NP_001153480.1:NP_039250.2:NP_039251.2:NP_039252.2:NP_039253.1:NP_039254.1:NP_039256.2:NP_039258.1	Mouse:Nrg1|
Matrisome-associated	Secreted Factors	NRG2	neuregulin 2	Don-1|HRG2|NTAK	7998	7998	F5GZS7:F5H0N2:O14511	NP_001171864.1:NP_001171864.1:NP_004874.1:NP_053584.1:NP_053585.1:NP_053586.1:XP_006714871.1:XP_006714873.1	Mouse:Nrg2|
Matrisome-associated	Secreted Factors	NRG3	neuregulin 3	HRG3|pro-NRG3	7999	7999	D9ZHQ3:D9ZHQ6:D9ZHQ7:D9ZHQ8:P56975:R4GNI6	NP_001010848.2:NP_001159445.1:XP_005269501.1	Mouse:Nrg3|
Matrisome-associated	Secreted Factors	NRG4	neuregulin 4	DKFZp779N0541|DKFZp779N1944|HRG4	29862	29862	E9PJI7:F8W729:H3BP63:Q0P6N6:Q7Z663:Q8WWG1	NP_612640.1	Mouse:Nrg4|
Matrisome-associated	Secreted Factors	NRTN	neurturin	NTN	8007	8007	Q99748	NP_004549.1	Mouse:Nrtn|
Matrisome-associated	Secreted Factors	NTF3	neurotrophin 3	HDNF|MGC129711|NGF-2|NGF2|NT3	8023	8023	P20783	NP_001096124.1:NP_002518.1	Mouse:Ntf3|
Matrisome-associated	Secreted Factors	NTF4	neurotrophin 4	GLC10|GLC1O|NT-4/5|NT4|NT5|NTF5	8024	8024	E7EP46:M0QZQ0:M0R0X2:P34130	NP_006170.1:XP_005259019.1:XP_006723295.1	Mouse:Ntf5|
Matrisome-associated	Secreted Factors	OSM	oncostatin M	MGC20461	8506	8506	B5MC70:B5MCX1:P13725	NP_065391.1	Mouse:Osm|
Matrisome-associated	Secreted Factors	PDGFA	platelet-derived growth factor alpha polypeptide	PDGF-A|PDGF1	8799	8799	H7BYW6:P04085	NP_002598.4:NP_148983.1:XP_006715796.1	Mouse:Pdgfa|
Matrisome-associated	Secreted Factors	PDGFB	platelet-derived growth factor beta polypeptide (simian sarcoma viral (v-sis) oncogene homolog)	FLJ12858|PDGF2|SIS|SSV|c-sis	8800	8800	A9UJN9:A9UJP0:P01127	NP_002599.1:NP_148937.1	Mouse:Pdgfb|
Matrisome-associated	Secreted Factors	PDGFC	platelet derived growth factor C	FALLOTEIN|SCDGF	8801	8801	B4E3A5:H0Y9N2:J3KN71:Q9NRA1	NP_057289.1	Mouse:Pdgfc|
Matrisome-associated	Secreted Factors	PDGFD	platelet derived growth factor D	IEGF|MGC26867|MSTP036|SCDGF-B|SCDGFB	30620	30620	H0YD37:Q9GZP0	NP_079484.1:NP_149126.1	Mouse:Pdgfd|
Matrisome-associated	Secreted Factors	PF4	platelet factor 4	CXCL4|MGC138298|SCYB4	8861	8861	P02776	NP_002610.1	Mouse:Pf4|
Matrisome-associated	Secreted Factors	PF4V1	platelet factor 4 variant 1	CXCL4L1|CXCL4V1|PF4-ALT|PF4A|SCYB4V1	8862	8862	P10720	NP_002611.1
Matrisome-associated	Secreted Factors	PGF	placental growth factor	D12S1900|PGFL|PLGF|PlGF-2|SHGC-10760	8893	8893	G3XA84:P49763	NP_001193941.1:NP_002623.2:XP_005267818.1	Mouse:Pgf|
Matrisome-associated	Secreted Factors	PIK3IP1	phosphoinositide-3-kinase interacting protein 1	HGFL|MGC17330|hHGFL(S)	24942	24942	C9JMK5:Q96FE7	NP_001129383.1:NP_443112.2	Mouse:Pik3ip1|
Matrisome-associated	Secreted Factors	PPBP	pro-platelet basic protein (chemokine (C-X-C motif) ligand 7)	B-TG1|Beta-TG|CTAP-III|CTAP3|CTAPIII|CXCL7|LA-PF4|	9240	9240	P02775	NP_002695.1	Mouse:Ppbp|
Matrisome-associated	Secreted Factors	PRL	prolactin	-	9445	9445	P01236	NP_000939.1:NP_001157030.1	Mouse:Prl|
Matrisome-associated	Secreted Factors	PSPN	persephin	PSP	9579	9579	M0QYK2:O60542	NP_004149.1	Mouse:Pspn|
Matrisome-associated	Secreted Factors	PTN	pleiotrophin	HARP|HBGF8|HBNF|NEGF1	9630	9630	C9JR52:P21246	NP_002816.1:XP_005250572.1	Mouse:Ptn|
Matrisome-associated	Secreted Factors	RPTN	repetin	FLJ39117	26809	26809	Q6XPR3	NP_001116437.1	Mouse:Rptn|
Matrisome-associated	Secreted Factors	S100A1	S100 calcium binding protein A1	S100|S100-alpha|S100A	10486	10486	P23297:Q5T7Y4:Q5T7Y5:Q5T7Y6	NP_006262.1	Mouse:S100a1|
Matrisome-associated	Secreted Factors	S100A10	S100 calcium binding protein A10	42C|ANX2L|ANX2LG|CAL1L|CLP11|Ca[1]|GP11|MGC111133|	10487	10487	P60903	NP_002957.1	Mouse:S100a10|
Matrisome-associated	Secreted Factors	S100A11	S100 calcium binding protein A11	MLN70|S100C	10488	10488	P31949	NP_005611.1	Mouse:S100a11|
Matrisome-associated	Secreted Factors	S100A12	S100 calcium binding protein A12	CAAF1|CAGC|CGRP|ENRAGE|MRP6|p6	10489	10489	P80511	NP_005612.1	Mouse:Gm5849|
Matrisome-associated	Secreted Factors	S100A13	S100 calcium binding protein A13	-	10490	10490	Q99584	NP_001019381.1:NP_001019382.1:NP_001019383.1:NP_001019384.1:NP_005970.1:XP_005245491.1	Mouse:S100a13|
Matrisome-associated	Secreted Factors	S100A14	S100 calcium binding protein A14	BCMP84|S100A15	18901	18901	Q9HCY8	NP_065723.1:XP_005245419.1:XP_006711531.1	Mouse:S100a14|
Matrisome-associated	Secreted Factors	S100A16	S100 calcium binding protein A16	AAG13|DT1P1A7|MGC17528|S100F	20441	20441	Q96FQ6	NP_525127.1:XP_005244962.1:XP_005244963.1	Mouse:S100a16|
Matrisome-associated	Secreted Factors	S100A2	S100 calcium binding protein A2	CAN19|MGC111539|S100L	10492	10492	P29034:Q5RHS7:R4GN49	NP_005969.1	Mouse:S100a2|
Matrisome-associated	Secreted Factors	S100A3	S100 calcium binding protein A3	S100E	10493	10493	P33764	NP_002951.1	Mouse:S100a3|
Matrisome-associated	Secreted Factors	S100A4	S100 calcium binding protein A4	18A2|42A|CAPL|FSP1|MTS1|P9KA|PEL98	10494	10494	P26447	NP_002952.1:NP_062427.1	Mouse:S100a4|
Matrisome-associated	Secreted Factors	S100A5	S100 calcium binding protein A5	S100D	10495	10495	P33763:Q52LE7	NP_002953.2:XP_005245487.1:XP_005245487.1	Mouse:S100a5|
Matrisome-associated	Secreted Factors	S100A6	S100 calcium binding protein A6	2A9|5B10|CABP|CACY|PRA	10496	10496	P06703:R4GN98	NP_055439.1	Mouse:S100a6|
Matrisome-associated	Secreted Factors	S100A7	S100 calcium binding protein A7	PSOR1|S100A7c	10497	10497	P31151	NP_002954.2:XP_005245488.1	Mouse:S100a7a|
Matrisome-associated	Secreted Factors	S100A7A	S100 calcium binding protein A7A	NICE-2|S100A15|S100A7L1|S100A7f	21657	21657	Q86SG5	NP_789793.1:XP_006711350.1	Mouse:S100a7a|
Matrisome-associated	Secreted Factors	S100A7L2	S100 calcium binding protein A7-like 2	S100a7b	21655	21655	Q5SY68	NP_001038944.2	Mouse:S100a7a|
Matrisome-associated	Secreted Factors	S100A8	S100 calcium binding protein A8	60B8AG|CAGA|CFAG|CGLA|CP-10|L1Ag|MA387|MIF|MRP8|NI	10498	10498	P05109	NP_002955.2	Mouse:S100a8|
Matrisome-associated	Secreted Factors	S100A9	S100 calcium binding protein A9	60B8AG|CAGB|CFAG|CGLB|L1AG|LIAG|MAC387|MIF|MRP14|N	10499	10499	P06702	NP_002956.1	Mouse:S100a9|
Matrisome-associated	Secreted Factors	S100B	S100 calcium binding protein B	NEF|S100|S100beta	10500	10500	A8MRB1:P04271	NP_006263.1	Mouse:S100b|
Matrisome-associated	Secreted Factors	S100G	S100 calcium binding protein G	CABP1|CABP9K|CALB3|MGC138379	1436	1436	P29377	NP_004048.1	Mouse:S100g|
Matrisome-associated	Secreted Factors	S100P	S100 calcium binding protein P	MIG9	10504	10504	P25815	NP_005971.1
Matrisome-associated	Secreted Factors	S100Z	S100 calcium binding protein Z	Gm625|S100-zeta	30367	30367	Q8WXG8	NP_570128.2	Mouse:S100z|
Matrisome-associated	Secreted Factors	SCUBE1	signal peptide, CUB domain, EGF-like 1	-	13441	13441	B1AH90:H0Y4Y9:Q8IWY4	NP_766638.2	Mouse:Scube1|
Matrisome-associated	Secreted Factors	SCUBE2	signal peptide, CUB domain, EGF-like 2	CEGB1|CEGF1|CEGP1|FLJ16792|FLJ35234|MGC133057	30425	30425	E7EQD6:H0YD28:H0YDN3:H0YEB3:H0YEI5:Q9NQ36	NP_001164161.1:NP_066025.2:XP_005253090.2	Mouse:Scube2|
Matrisome-associated	Secreted Factors	SCUBE3	signal peptide, CUB domain, EGF-like 3	CEGF3|DKFZp686B09105|DKFZp686B1223|DKFZp686D20108|	13655	13655	Q8IX30	NP_689966.2:XP_005249000.1	Mouse:Scube3|
Matrisome-associated	Secreted Factors	SFRP1	secreted frizzled-related protein 1	FRP|FRP-1|FRP1|FrzA|SARP2	10776	10776	Q6ZSL4:Q8N474	NP_003003.3	Mouse:Sfrp1|
Matrisome-associated	Secreted Factors	SFRP2	secreted frizzled-related protein 2	FRP-2|SARP1|SDF-5	10777	10777	Q96HF1	NP_003004.1	Mouse:Sfrp2|
Matrisome-associated	Secreted Factors	SFRP4	secreted frizzled-related protein 4	FRP-4|FRPHE|MGC26498	10778	10778	C9JMJ2:Q6FHJ7	NP_003005.2	Mouse:Sfrp4|
Matrisome-associated	Secreted Factors	SFRP5	secreted frizzled-related protein 5	SARP3	10779	10779	Q5T4F7	NP_003006.2	Mouse:Sfrp5|
Matrisome-associated	Secreted Factors	SHH	sonic hedgehog homolog (Drosophila)	HHG1|HLP3|HPE3|MCOPCB5|SMMCI|TPT|TPTPS	10848	10848	C9JC48:F8WB84:F8WEH4:Q15465	NP_000184.1	Mouse:Shh|
Matrisome-associated	Secreted Factors	TCHH	trichohyalin	MGC157889|MGC157890|THH|THL|TRHY	11791	11791	Q07283	NP_009044.2	Mouse:Tchh|
Matrisome-associated	Secreted Factors	TCHHL1	trichohyalin-like 1	S100A17|THHL1|basalin	31796	31796	Q5QJ38	NP_001008536.1	Mouse:Tchhl1|
Matrisome-associated	Secreted Factors	TDGF1	teratocarcinoma-derived growth factor 1	CR|CRGF|CRIPTO|Cripto-1	11701	11701	F5H1T8:P13385	NP_001167607.1:NP_001167607.1:NP_003203.1	Mouse:Tdgf1|
Matrisome-associated	Secreted Factors	TGFA	transforming growth factor, alpha	TFGA	11765	11765	E7EPT6:F8VNR3:F8WA74:H0Y6S5:P01135	NP_001093161.1:NP_003227.1:XP_005264579.1	Mouse:Tgfa|
Matrisome-associated	Secreted Factors	TGFB1	transforming growth factor, beta 1	CED|DPD1|LAP|TGFB|TGFbeta	11766	11766	M0R2S0:P01137	NP_000651.3	Mouse:Tgfb1|
Matrisome-associated	Secreted Factors	TGFB2	transforming growth factor, beta 2	MGC116892|TGF-beta2	11768	11768	P61812	NP_001129071.1:NP_003229.1	Mouse:Tgfb2|
Matrisome-associated	Secreted Factors	TGFB3	transforming growth factor, beta 3	ARVD|FLJ16571|TGF-beta3	11769	11769	P10600:Q8WV88	NP_003230.1:XP_005268085.1	Mouse:Tgfb3|
Matrisome-associated	Secreted Factors	THPO	thrombopoietin	MGC163194|MGDF|MKCSF|ML|MPLLG|TPO	11795	11795	F8W6L1:P40225	NP_000451.1:NP_001171068.1:NP_001171069.1:NP_001276926.1:NP_001276927.1:NP_001276932.1:NP_001276951.1:NP_001276955.1:NP_001276956.1:NP_001276957.1:NP_001276926.1:NP_001276956.1	Mouse:Thpo|
Matrisome-associated	Secreted Factors	TNF	tumor necrosis factor (TNF superfamily, member 2)	DIF|TNF-alpha|TNFA|TNFSF2	11892	11892	P01375	NP_000585.2	Mouse:Tnf|
Matrisome-associated	Secreted Factors	TNFSF10	tumor necrosis factor (ligand) superfamily, member 10	APO2L|Apo-2L|CD253|TL2|TRAIL	11925	11925	H7C246:P50591	NP_001177871.1:NP_003801.1	Mouse:Tnfsf10|
Matrisome-associated	Secreted Factors	TNFSF11	tumor necrosis factor (ligand) superfamily, member 11	CD254|ODF|OPGL|OPTB2|RANKL|TRANCE|hRANKL2|sOdf	11926	11926	O14788	NP_003692.1:NP_143026.1	Mouse:Tnfsf11|
Matrisome-associated	Secreted Factors	TNFSF12	tumor necrosis factor (ligand) superfamily, member 12	APO3L|DR3LG|MGC129581|MGC20669|TWEAK	11927	11927	C0H5Y4:O43508	NP_003800.1:NP_742086.1	Mouse:Tnfsf12|
Matrisome-associated	Secreted Factors	TNFSF13	tumor necrosis factor (ligand) superfamily, member 13	APRIL|CD256|TALL2|TRDL-1|UNQ383/PRO715|ligand	11928	11928	C9JF68:C9JFN2:K7EJ28:O75888	NP_001185552.1:NP_001185553.1:NP_003799.1:NP_742084.1:NP_742085.1	Mouse:Tnfsf13|
Matrisome-associated	Secreted Factors	TNFSF13B	tumor necrosis factor (ligand) superfamily, member 13b	BAFF|BLYS|CD257|DTL|TALL-1|TALL1|THANK|TNFSF20|ZTN	11929	11929	Q9Y275	NP_001139117.1:NP_006564.1	Mouse:Tnfsf13b|
Matrisome-associated	Secreted Factors	TNFSF14	tumor necrosis factor (ligand) superfamily, member 14	CD258|HVEML|LIGHT|LTg|TR2	11930	11930	O43557	NP_003798.2:NP_742011.2:XP_005259727.1	Mouse:Tnfsf14|
Matrisome-associated	Secreted Factors	TNFSF15	tumor necrosis factor (ligand) superfamily, member 15	MGC129934|MGC129935|TL1|TL1A|VEGI|VEGI192A	11931	11931	O95150:X6R8I9	NP_001191273.1:NP_005109.2	Mouse:Tnfsf15|
Matrisome-associated	Secreted Factors	TNFSF18	tumor necrosis factor (ligand) superfamily, member 18	AITRL|GITRL|MGC138237|TL6|hGITRL	11932	11932	Q9UNG2	NP_005083.2	Mouse:Tnfsf18|
Matrisome-associated	Secreted Factors	TNFSF4	tumor necrosis factor (ligand) superfamily, member 4	CD134L|CD252|GP34|OX-40L|OX4OL|TXGP1	11934	11934	P23510:Q8IV74	NP_003317.1:XP_005245532.1	Mouse:Tnfsf4|
Matrisome-associated	Secreted Factors	TNFSF8	tumor necrosis factor (ligand) superfamily, member 8	CD153|CD30L|CD30LG|MGC138144	11938	11938	P32971	NP_001235.1	Mouse:Tnfsf8|
Matrisome-associated	Secreted Factors	TNFSF9	tumor necrosis factor (ligand) superfamily, member 9	4-1BB-L|CD137L	11939	11939	P41273	NP_003802.1:XP_006722994.1	Mouse:Tnfsf9|
Matrisome-associated	Secreted Factors	TPO	thyroid peroxidase	MSA|TDH2A|TPX	12015	12015	C9J511:C9JFW0:E9PFM6:H0Y6H4:H7BZH8:H7C1F5:H7C5B6:P07202	NP_000538.3:NP_001193673.1:NP_001193674.1:NP_783650.1:NP_783652.1:NP_783653.1	Mouse:Tpo|
Matrisome-associated	Secreted Factors	VEGFA	vascular endothelial growth factor A	MGC70609|MVCD1|VEGF|VPF	12680	12680	A2A2V4:H0YBI8:H0YBZ0:H3BLW8:J3KPA4:P15692	NP_001020537.2:NP_001020538.2:NP_001020539.2:NP_001020540.2:NP_001020541.2:NP_001028928.1:NP_001165093.1:NP_001165094.1:NP_001165095.1:NP_001165096.1:NP_001165097.1:NP_001165098.1:NP_001165099.1:NP_001165100.1:NP_001165101.1:NP_001191313.1:NP_001191314.1:NP_001273973.1:NP_003367.4:NP_001273973.1	Mouse:Vegfa|
Matrisome-associated	Secreted Factors	VEGFB	vascular endothelial growth factor B	VEGFL|VRF	12681	12681	H0YGB6:P49765	NP_001230662.1:NP_003368.1	Mouse:Vegfb|
Matrisome-associated	Secreted Factors	VEGFC	vascular endothelial growth factor C	Flt4-L|VRP	12682	12682	P49767	NP_005420.1	Mouse:Vegfc|
Matrisome-associated	Secreted Factors	VWC2	von Willebrand factor C domain containing 2	MGC131845|PSST739|UNQ739	30200	30200	Q2TAL6	NP_940972.2	Mouse:Vwc2|
Matrisome-associated	Secreted Factors	VWC2L	von Willebrand factor C domain-containing protein 2-like	-	37203	37203	B2RUY7:B7ZW27	NP_001073969.1	Mouse:Vwc2l|
Matrisome-associated	Secreted Factors	WFIKKN1	WAP, follistatin/kazal, immunoglobulin, kunitz and netrin domain containing 1	C16orf12|MGC126651|MGC126655|RJD2|WFIKKN	30912	30912	Q96NZ8	NP_444514.1	Mouse:Wfikkn1|
Matrisome-associated	Secreted Factors	WFIKKN2	WAP, follistatin/kazal, immunoglobulin, kunitz and netrin domain containing 2	WFIKKNRP	30916	30916	C9J6G4:Q8TEU8	NP_783165.1	Mouse:Wfikkn2|
Matrisome-associated	Secreted Factors	WIF1	WNT inhibitory factor 1	WIF-1	18081	18081	F5H8A3:H0YFK7:Q9Y5W5	NP_009122.2	Mouse:Wif1|
Matrisome-associated	Secreted Factors	WNT1	wingless-type MMTV integration site family, member 1	INT1	12774	12774	P04628	NP_005421.1	Mouse:Wnt1|
Matrisome-associated	Secreted Factors	WNT10A	wingless-type MMTV integration site family, member 10A	FLJ14301|SSPS	13829	13829	H7BZB8:Q9GZT5	NP_079492.2	Mouse:Wnt10a|
Matrisome-associated	Secreted Factors	WNT10B	wingless-type MMTV integration site family, member 10B	SHFM6|WNT-12	12775	12775	B5MCC8:C9J3H3:C9JCI2:O00744:Q4VAJ4	NP_003385.2	Mouse:Wnt10b|
Matrisome-associated	Secreted Factors	WNT11	wingless-type MMTV integration site family, member 11	HWNT11|MGC141946|MGC141948	12776	12776	O96014	NP_004617.2:XP_005274288.1	Mouse:Wnt11|
Matrisome-associated	Secreted Factors	WNT16	wingless-type MMTV integration site family, member 16	-	16267	16267	E9PH60:Q9UBV4	NP_057171.2:NP_057171.2:NP_476509.1	Mouse:Wnt16|
Matrisome-associated	Secreted Factors	WNT2	wingless-type MMTV integration site family member 2	INT1L1|IRP	12780	12780	C9JUI2:F8WDR1:P09544	NP_003382.1	Mouse:Wnt2|
Matrisome-associated	Secreted Factors	WNT2B	wingless-type MMTV integration site family, member 2B	WNT13|XWNT2	12781	12781	Q5TEH8:Q93097	NP_001278809.1:NP_004176.2:NP_078613.1	Mouse:Wnt2b|
Matrisome-associated	Secreted Factors	WNT3	wingless-type MMTV integration site family, member 3	INT4|MGC131950|MGC138321|MGC138323	12782	12782	P56703	NP_110380.1	Mouse:Wnt3|
Matrisome-associated	Secreted Factors	WNT3A	wingless-type MMTV integration site family, member 3A	MGC119418|MGC119419|MGC119420	15983	15983	P56704	NP_149122.1	Mouse:Wnt3a|
Matrisome-associated	Secreted Factors	WNT4	wingless-type MMTV integration site family, member 4	SERKAL|WNT-4	12783	12783	B1AJZ6:H0Y663:P56705	NP_110388.2:XP_005245954.1	Mouse:Wnt4|
Matrisome-associated	Secreted Factors	WNT5A	wingless-type MMTV integration site family, member 5A	hWNT5A	12784	12784	C9J8I8:P41221	NP_001243034.1:NP_003383.2:XP_006713387.1	Mouse:Wnt5a|
Matrisome-associated	Secreted Factors	WNT5B	wingless-type MMTV integration site family, member 5B	MGC2648	16265	16265	F5GYM2:F5H034:F5H364:F5H7Q6:Q9H1J7	NP_110402.2:NP_116031.1	Mouse:Wnt5b|
Matrisome-associated	Secreted Factors	WNT6	wingless-type MMTV integration site family, member 6	-	12785	12785	Q9Y6F9	NP_006513.1	Mouse:Wnt6|
Matrisome-associated	Secreted Factors	WNT7A	wingless-type MMTV integration site family, member 7A	-	12786	12786	O00755	NP_004616.2	Mouse:Wnt7a|
Matrisome-associated	Secreted Factors	WNT7B	wingless-type MMTV integration site family, member 7B	-	12787	12787	A8K0G1:B8A595:B8A597:B8A598:P56706	NP_478679.1	Mouse:Wnt7b|
Matrisome-associated	Secreted Factors	WNT8A	wingless-type MMTV integration site family, member 8A	WNT8D	12788	12788	D6RF47:D6RF94:Q9H1J5	NP_490645.1:XP_005272134.1:XP_005272133.1	Mouse:Wnt8a|
Matrisome-associated	Secreted Factors	WNT8B	wingless-type MMTV integration site family, member 8B	-	12789	12789	Q93098	NP_003384.2	Mouse:Wnt8b|
Matrisome-associated	Secreted Factors	WNT9A	wingless-type MMTV integration site family, member 9A	MGC138165|MGC141991|WNT14	12778	12778	O14904	NP_003386.1	Mouse:Wnt9a|
Matrisome-associated	Secreted Factors	WNT9B	wingless-type MMTV integration site family, member 9B	WNT14B|WNT15	12779	12779	E7EPC3:I3L0L8:O14905	NP_003387.1:XP_005257694.1:XP_006725694.1	Mouse:Wnt9b|
Matrisome-associated	Secreted Factors	XCL1	chemokine (C motif) ligand 1	ATAC|LPTN|LTN|SCM-1|SCM-1a|SCM1|SCYC1	10645	10645	P47992	NP_002986.1	Mouse:Xcl1|
Matrisome-associated	Secreted Factors	XCL2	chemokine (C motif) ligand 2	SCM-1b|SCM1B|SCYC2	10646	10646	Q9UBD3	NP_003166.1
Matrisome-associated	Secreted Factors	ZFP91	zinc finger protein 91 homolog (mouse)	FKSG11|PZF|ZNF757	14983	14983	Q96JP5	NP_001183980.1:NP_444251.1	Mouse:Zfp91-Cntf|

## Sheet: TF direct targets (matrisome) 
Matrisome genes that are direct target of longevity transcription factors
CREB1	FOXO1	FOXO3	GATA1	GATA2	GATA3	GATA4	HIF1A	JUN	KLF4	MYC	NFE2L2	RELA	REST	STAT3	STAT5A	TP53
CRELD1	IGFBP1	CRIM1	ADIPOQ	CDCP2	CTGF	COLQ	DPT	COCH	BMPER	CRISPLD1	BMPER	DDX26B	AMELX	ABI3BP	CDCP2	BMPER
CTGF	TSKU	CTGF	BMPER	CILP	IGFBP4	CRISPLD2	IGFBP3	COMP	COCH	CRISPLD2	CILP2	DMP1	BMPER	BMPER	ECM2	CILP
CYR61	SEMA4B	CYR61	CDCP2	COLQ	LAMB2	EMID1	PXDN	CRIM1	CRELD1	CYR61	CRELD1	ECM2	COMP	COLQ	IGFALS	COLQ
FN1	CELA2A	IGFBP4	COLQ	CRISPLD2	LAMC1	FBLN2	WISP1	CTHRC1	CYR61	DSPP	CRIM1	EFEMP2	CRELD2	CRELD2	LAMA4	CRELD1
IGFBP6	F10	LAMC1	CRISPLD2	DSPP	MFGE8	FGL1	WISP3	FNDC8	EFEMP2	EDIL3	ECM1	FN1	DPT	CRIM1	MFGE8	CRELD2
KCP	PLG	MEPE	DDX26B	EFEMP1	NELL2	GAS6	SEMA4B	IGFBP4	EMILIN1	ELN	FGL2	IGFBP1	ECM2	CRISPLD2	OIT3	CRIM1
LAMA3	SERPINA5	MFAP3	ECM1	EMID1	SMOC1	IGFBP4	EGLN3	IGFBPL1	EMILIN3	EMILIN1	FN1	IGFBP2	EDIL3	CTGF	SPARC	CRISPLD2
LTBP1	SERPINA9	NTN1	EMID1	EMILIN2	SPARCL1	IGFBP5	LOXL2	LAMA1	FBLN1	FBN1	IGFBP3	LAMB2	EFEMP2	DDX26B	TNC	CYR61
LTBP3	IFNK	OIT3	EMILIN1	FBLN1	VTN	LTBP1	P4HA1	LTBP1	FN1	FN1	IGFBP7	LAMB3	EMILIN1	EDIL3	TSKU	DDX26B
NELL2		THBS1	EMILIN2	FBLN2	COL17A1	LTBP3	P4HA2	LTBP3	IGFALS	FNDC7	LAMA2	LRG1	FBLN2	EFEMP1	VWA5A	EFEMP2
RELN		WISP2	EYS	FBN1	COL4A1	LTBP4	PLOD2	NTN4	IGFBP2	IBSP	LAMA4	LTBP4	FBN2	EFEMP2	COL16A1	EGFLAM
SLIT3		COL2A1	FBLN2	FN1	FMOD	NDNF	ANGPTL4	NTNG1	IGFBP5	IGFALS	LAMC1	SPP1	FGB	ELN	COL24A1	EYS
THSD4		ANXA11	FBLN7	FNDC8	SPOCK3	PCOLCE2	BMP4	NTNG2	LAMA1	IGFBP2	LAMC2	THBS1	FGG	EMID1	ASPN	FBLN1
COL13A1		ANXA2	FNDC1	FRAS1	LGALS3	SVEP1	GDF15	PXDN	LAMB1	IGFBP5	MATN2	THBS2	FNDC1	EMILIN2	OGN	FBLN2
COL15A1		PLXDC2	FRAS1	GAS6	MUC20	THBS1	INHA	SLIT2	LAMB2	IGFBPL1	NPNT	TINAG	GAS6	EYS	OMD	FBLN5
COL16A1		SFTPD	IGFBP6	HMCN1	ADAMTS5	COL12A1	INHBA	TNC	LAMC2	LAMB1	OIT3	TNC	GLDN	FBLN2	C1QA	FBN1
COL17A1		ADAM17	LAMC3	IGFBP1	AMBP	COL4A4	PDGFB	VWF	LGI4	LAMC1	RSPO2	TSKU	IGFALS	FBN1	LGALS12	FBN2
COL1A1		ADAM19	LGI2	IGFBP3	CST11	ANXA11	S100A10	ZP4	LTBP2	LGI2	SPARC	COL1A2	IGFBPL1	FBN2	LGALS8	FNDC1
COL5A1		CTSO	LTBP1	IGFBP4	CTSF	ANXA7	S100P	COL12A1	MFAP3	LGI4	TINAG	BGN	IGSF10	FGA	MUC1	FNDC7
COL9A3		HPSE	MFAP2	IGSF10	MMP19	COLEC12		COL22A1	MFGE8	LTBP1	TNC	HSPG2	LAMA1	FGG	MUC15	FNDC8
HSPG2		ITIH3	NTN1	KAL1	P4HA2	SDC1		COL4A1	NID1	LTBP2	TSKU	SRGN	LAMB2	FN1	PLXNB1	GAS6
SPOCK1		LEPRE1	NTN3	LAMA4	PLOD1	SEMA3A		COL4A2	NID2	LTBP3	VWA5B2	ANXA7	LAMB3	FNDC1	PROL1	IBSP
SPOCK2		MMP15	NTN4	LAMB1	SULF2	ADAMTS1		COL6A3	NOV	LTBP4	COL14A1	C1QTNF6	LAMC3	FRAS1	SEMA3C	IGFBP4
ANXA6		MMP17	NTN5	LAMB3	CCL1	ADAMTS15		ESM1	NTN1	MATN1	COL1A2	CD209	LGI2	GLDN	SEMA3E	IGFBP5
ELFN1		PAPPA	NTNG2	LGI2	CCL22	ADAMTS5		IMPG1	NTNG2	MATN4	COL25A1	COLEC10	MATN1	IBSP	SEMA6A	IGFBP7
ELFN2		SERPINA11	OIT3	LGI4	CXCL14	ADAMTS6		PRG2	RELN	MFAP2	COL4A1	LGALS1	MFAP3	IGFBP2	SFTPD	LAMA1
ITLN1		SULF2	RELN	LTBP1	FASLG	ADAMTS8		SPOCK3	SLIT2	MFAP3	COL5A1	LGALS3	MFGE8	IGFBP3	ADAMTS5	LAMA2
LGALS1		BTC	RSPO4	MATN1	FGF1	CST3		ANXA10	SMOC1	NELL2	COL8A1	MUC1	NDNF	IGFBP7	ADAMTS6	LAMA5
LGALS9		EBI3	SLIT3	MEPE	FGF2	CTSA		COLEC10	SPON1	NID2	DCN	MUC17	NELL1	IGFBPL1	ADAMTSL3	LAMC2
MUC19		EREG	SVEP1	MFAP4	GDF15	HRG		COLEC12	SPP1	NPNT	HAPLN1	MUC2	NELL2	IGSF10	CTSC	LAMC3
MUC5B		FGF3	THBS1	MGP	IL25	HYAL2		CSPG5	THBS1	NTN1	VCAN	PLXNB2	NPNT	LAMA1	CTSH	LTBP1
MUC6		FLT3LG	THSD4	NID1	INSL5	KAZALD1		GPC3	THBS2	NTN4	ANXA1	SDC4	NTN1	LAMA2	FAM20A	LTBP2
PLXDC1		GDF15	TINAGL1	NTN1	PIK3IP1	MMP27		GPC4	THBS3	NTNG1	CLEC1A	SEMA4C	NTN5	LAMA3	LEPREL1	MATN1
PLXNA4		IL10	TNR	NTN3	TNF	P4HTM		GPC5	VWA1	PCOLCE	COLEC10	ADAM19	OTOG	LAMA4	PZP	MATN3
PLXNB1		LEP	VIT	NTNG2	WNT2B	TGM2		GPC6	VWA2	PCOLCE2	COLEC12	AGT	OTOL1	LAMA5	SERPINA11	MEPE
PLXNB2		MEGF8	VWA5A	OIT3	WNT7B	TIMP3		LGALS9	ZP3	POSTN	GPC5	CTSB	PAPLN	LAMB1	SERPINB5	MFAP4
SEMA3B		PIK3IP1	VWA5B2	OTOG	ZFP91	ANGPTL6		PLXNA4	COL14A1	RSPO3	GPC6	CTSL	RELN	LAMB4	SERPINB6	MFGE8
SEMA4B		S100A10	VWA7	RELN		FGF12		PLXNB1	COL18A1	RSPO4	LGALS3	CTSS	SBSPON	LAMC1	SERPINE1	MMRN2
SEMA4C		S100P	VWA9	RSPO4		FGF18		PLXNB3	COL2A1	SBSPON	MUC20	HPSE	SLIT1	LAMC2	TGM1	NELL1
SEMA4G		TNFSF18	VWCE	SLIT3		GDF6		REG1A	COL4A1	SLIT1	PLXDC2	ITIH2	SLIT2	LGI1	CCL2	NELL2
SEMA5A		TNFSF8	VWF	SNED1		IGF1		REG1B	COL4A2	SLIT2	PLXNA2	MMP1	SNED1	LGI2	CX3CL1	NID1
SEMA6A		VEGFA	WISP1	SPARC		IHH		REG3A	COL4A5	SMOC1	SEMA3E	MMP3	SPON1	LTBP1	FGFBP1	NID2
ADAM11			ZP4	SPP1		INHA		SEMA5A	COL4A6	SMOC2	SEMA4A	MMP9	SRPX2	LTBP4	FLT3LG	NTN1
ADAMTS1			COL12A1	SSPO		LTA		ADAM12	COL5A1	SPON1	SEMA6A	PAPPA	THBS2	MATN4	GDF5	NTN4
ADAMTS17			COL15A1	SVEP1		PIK3IP1		ADAM23	COL6A1	THBS1	SEMA6D	PI3	TNC	MFAP1	IL15	NTNG1
ADAMTS2			COL18A1	THBS1		TGFB2		ADAM30	COL6A2	THBS2	ADAM17	PLAU	TNR	MFAP5	IL34	NTNG2
ADAMTS20			COL1A1	THSD4		TNF		ADAMTS1	COL8A2	THBS3	ADAM22	SERPINA1	TSKU	NELL1	PDGFD	OTOG
ADAMTS3			COL22A1	TINAG		WNT11		ADAMTS12	ANXA11	THBS4	ADAM23	SERPINA3	TSPEAR	NELL2	S100A8	PAPLN
ADAMTS5			COL23A1	TINAGL1		ZFP91		ADAMTS18	ANXA2	TNFAIP6	ADAMTS6	SERPINB1	VTN	NID2	TNFSF15	POSTN
ASTL			COL24A1	TNR				ADAMTS2	ANXA5	TNXB	ADAMTSL4	SERPINB8	VWA3B	NTN4	TNFSF8	PXDN
CPN2			COL27A1	TSKU				ADAMTS5	ANXA7	TSKU	AMBP	SERPINE1	VWA5B1	NTN5		RELN
CTSL			COL2A1	VIT				AGT	ANXA8	VWA9	CST6	SERPINE2	VWA9	NTNG1		RSPO3
CTSZ			COL4A2	VWA5A				CD109	ANXA9	VWDE	CSTB	SERPINH1	WISP2	OIT3		SLIT1
EGLN3			COL4A3	VWA5B1				F9	C1QL4	VWF	CTSB	SLPI	ZP1	PCOLCE		SLIT2
HPSE2			COL4A4	VWA7				FAM20B	C1QTNF7	WISP1	CTSC	TGM1	COL11A1	POSTN		SLIT3
HYAL2			COL5A1	VWCE				HTRA3	CSPG4	ZP4	CTSO	TGM2	COL11A2	PXDNL		SMOC1
HYAL3			COL5A3	VWF				HYAL4	CSPG5	ZPLD1	EGLN3	TLL1	COL13A1	RELN		SMOC2
LOXL3			COL9A1	COL18A1				ITIH2	GPC1	COL13A1	HABP2	AMH	COL16A1	RSPO2		SPON1
MMP14			FMOD	COL19A1				LEPREL1	GPC4	COL15A1	MMP7	ANGPT1	COL17A1	SBSPON		SPON2
MMP9			HAPLN2	COL1A1				LOX	LGALS3	COL16A1	P4HA1	BDNF	COL18A1	SLIT2		SVEP1
OGFOD2			HSPG2	COL23A1				LOXL4	LGALS8	COL18A1	PAPPA	BMP2	COL22A1	SLIT3		TGFBI
P4HA2			NYX	COL25A1				MEP1A	LMAN1	COL19A1	SERPINA12	BMP4	COL4A2	SMOC1		THBS1
PAMR1			OPTC	COL26A1				MMP14	PLXNB1	COL1A1	SERPINB9	CCL1	COL5A3	SNED1		THBS2
PLOD3			PODNL1	COL27A1				MMP16	SDC3	COL20A1	SERPINE1	CCL11	COL6A5	SPARCL1		THBS4
SERPINB13			ANXA11	COL4A5				PAPPA	SDC4	COL24A1	SERPINF1	CCL17	COL6A6	TECTB		THSD4
SULF2			ANXA3	COL5A1				PLAU	SEMA3F	COL25A1	SLPI	CCL19	COL7A1	THBS1		TNC
TIMP3			ANXA4	COL9A1				PRSS12	SEMA4B	COL27A1	SULF1	CCL2	COL8A1	THBS2		TNR
BDNF			ANXA6	HAPLN2				SERPIND1	SEMA6A	COL28A1	TGM3	CCL20	COL9A2	THSD4		TSKU
BMP7			ANXA9	HAPLN3				SERPINE1	SEMA6B	COL4A2	ANGPT1	CCL22	ASPN	TNFAIP6		TSPEAR
CLCF1			C1QTNF9	HSPG2				SPAM1	ADAM17	COL5A1	AREG	CCL23	BCAN	TSKU		VWA5B2
CTF1			CLEC17A	OPTC				TLL1	ADAM19	COL5A2	BMP4	CCL28	DCN	TSPEAR		VWCE
CXCL11			CSPG4	PRG2				TMPRSS15	ADAM23	COL5A3	BMP6	CCL4	HAPLN2	VTN		VWF
CXCL5			EMCN	ANXA11				ANGPTL1	ADAMTS18	COL6A1	BMP8A	CCL5	KERA	VWA3B		WISP3
EGF			FCN3	ANXA3				BMP15	ADAMTS4	COL9A1	BTC	CLCF1	NCAN	VWA5A		ZPLD1
EREG			FREM1	C1QA				BMP3	CD109	COL9A2	CCL1	CSF1	OPTC	VWDE		COL11A2
FGF7			LGALS1	C1QTNF6				BMP8A	CST3	EPYC	CCL8	CSF2	SPOCK1	VWF		COL12A1
FRZB			MBL2	C1QTNF9				BRINP3	CSTB	HAPLN2	CSF3	CSF3	SPOCK3	WISP3		COL13A1
GDF15			MUC1	CLEC17A				CCL11	CSTL1	PODNL1	CXCL5	CXCL1	ANXA4	ZPLD1		COL18A1
GDNF			MUC13	CLEC1A				CCL2	CTSW	PRG2	FGF10	CXCL10	C1QA	COL11A1		COL1A1
MEGF8			MUC2	CLEC4D				CCL7	EGLN2	SPOCK3	FGF11	CXCL11	C1QL2	COL12A1		COL23A1
PIK3IP1			MUC20	CLEC4G				CRLF1	F12	ANXA10	FGF23	CXCL2	C1QTNF2	COL13A1		COL24A1
SCUBE1			MUC6	CLEC6A				FASLG	FAM20B	ANXA11	FGF7	CXCL3	CD209	COL14A1		COL26A1
WNT1			PLXDC2	COLEC11				FGF13	HTRA1	ANXA4	GDNF	CXCL5	CLEC11A	COL16A1		COL27A1
WNT10A			PLXNA1	COLEC12				FGF18	HYAL1	ANXA7	IGF1	CXCL6	CLEC1B	COL17A1		COL2A1
WNT7A			PLXNA2	CSPG4				FGF19	HYAL2	ANXA8	IL12A	CXCL8	CLEC4F	COL21A1		COL4A1
WNT8B			PLXNA4	EMCN				FGF5	HYAL3	C1QC	IL15	CXCL9	CLEC6A	COL22A1		COL4A3
ZFP91			PLXNB2	ITLN2				GDF1	LOX	C1QTNF8	IL7	EBI3	COLEC10	COL23A1		COL4A5
			PLXNC1	LGALS1				IL17C	MASP2	CLEC11A	INHBB	EPO	ELFN1	COL24A1		COL4A6
			SDC3	LGALS3				IL2	MMP11	CLEC2D	KITLG	FASLG	ELFN2	COL26A1		COL5A1
			SEMA4B	LGALS7				IL6	MMP14	CLEC3A	LEFTY1	FGF8	EMCN	COL27A1		COL5A2
			SEMA5B	MUC13				IL7	MMP15	CLEC4D	MEGF11	FSTL3	GPC3	COL4A3		COL6A3
			SEMA6A	MUC2				INHBA	MMP16	CLEC5A	MEGF9	HGF	LGALS2	COL4A6		COL8A1
			SEMA6C	MUC20				INSL3	MMP17	COLEC12	NRG3	IFNB1	LGALS3	COL6A1		COL8A2
			ADAM11	MUC3A				LEP	OGFOD1	CSPG5	PDGFC	IFNG	LGALS9	COL6A5		COL9A3
			ADAM19	MUC6				MST1	P4HA2	ELFN1	SCUBE3	IL10	LMAN1	COL8A2		ACAN
			ADAMTS14	PLXDC2				NTF3	P4HTM	FCN3	SFRP2	IL11	LMAN1L	EPYC		BCAN
			ADAMTS17	PLXNA1				S100P	PLOD1	GPC2	TGFB2	IL12A	MBL2	ESM1		CHAD
			ADAMTSL4	PLXNA2				SHH	PLOD3	GPC3	VEGFA	IL12B	MUC13	HAPLN1		HAPLN3
			ADAMTSL5	PLXNB3				TNFSF13B	SERPINA3	GPC5	VEGFC	IL13	PARM1	IMPG2		HSPG2
			CD109	SDC3				TPO	SERPINB5	GPC6	WNT5A	IL15	PLXDC2	SPOCK1		NYX
			CELA1	SDC4				VEGFC	SERPINB6	LGALS2	WNT7B	IL17A	PLXNA1	SPOCK2		OGN
			CPN2	SEMA3D					SERPINE2	LGALS9	XCL2	IL17F	PLXNA2	SPOCK3		PODN
			CTSB	SEMA3F					SERPINI1	LMAN1		IL1A	PLXNA4	ANXA1		PODNL1
			CTSC	SEMA4D					ST14	LMAN1L		IL1B	PLXNB1	ANXA10		SPOCK1
			CTSD	SEMA4F					SULF2	MUC2		IL1RN	PLXNB2	ANXA3		SRGN
			CTSE	SEMA6A					AMH	MUC5B		IL2	PLXNC1	ANXA4		VCAN
			CTSF	ADAM11					ANGPTL2	PLXDC1		IL23A	REG1B	C1QTNF1		ANXA1
			CTSL	ADAM18					ARTN	PLXDC2		IL6	REG3A	C1QTNF9		ANXA2
			CTSS	ADAM19					BDNF	PLXNA2		IL7	SEMA3E	CLEC10A		ANXA5
			CTSZ	ADAM23					BMP2	PLXNA4		IL9	SEMA4F	CLEC12A		ANXA6
			EGLN1	ADAMTS14					BMP4	REG1A		INHBA	SEMA5B	CLEC12B		ANXA8
			EGLN3	ADAMTS3					BMP7	SDC1		INHBE	SEMA6A	CLEC14A		C1QL1
			FAM20B	ADAMTS4					BMP8A	SDC2		KITLG	SEMA6D	CLEC18C		C1QL2
			HPSE	ADAMTS5					BMP8B	SEMA3A		LTA	SEMA7A	CLEC1B		C1QL3
			HPSE2	ADAMTS6					CBLN1	SEMA3D		LTB	SFTPD	CLEC2L		C1QTNF7
			HTRA3	ADAMTS9					CBLN3	SEMA3G		MDK	ADAM11	ELFN1		CLEC18B
			KY	ADAMTSL1					CCL27	SEMA4D		MST1L	ADAM12	FREM1		CLEC1A
			LOX	ADAMTSL2					CFC1	SEMA4F		NGF	ADAM2	GPC5		CLEC4E
			LPA	ADAMTSL4					CRLF1	SEMA5A		NRG1	ADAM20	GPC6		CLEC9A
			MASP1	ADAMTSL5					CRLF3	SEMA5B		PDGFB	ADAM21	HPX		COLEC12
			MMP14	C17orf58					CX3CL1	SEMA6A		PRL	ADAM23	LGALS12		CSPG4
			MMP15	CD109					CXCL12	SFTPD		S100A10	ADAM29	LGALS13		ELFN1
			MMP27	CELA1					CXCL14	ADAM12		S100A13	ADAM32	LGALS4		ELFN2
			MMP8	CTSB					DHH	ADAM15		S100A2	ADAM7	LMAN1		FREM2
			OGFOD1	CTSS					EBI3	ADAM17		S100A3	ADAMDEC1	MBL2		GPC1
			P4HA1	EGLN3					FGF12	ADAM18		S100A4	ADAMTS13	MUC1		GPC2
			P4HA2	FAM20B					FGF18	ADAM2		S100A6	ADAMTS16	MUC20		GPC3
			PAPPA	HPSE2					FGF3	ADAM23		TNF	ADAMTS2	PARM1		GPC4
			PCSK6	LEPREL2					FGF8	ADAM29		TNFSF10	ADAMTS20	PLXDC2		GPC5
			PLG	LOXL4					GDF15	ADAM8		TNFSF13	ADAMTS4	PLXNA1		GPC6
			PRSS12	MEP1A					GDF3	ADAM9		TNFSF13B	ADAMTSL1	PLXNA2		GREM1
			SERPINB1	MMP10					GDNF	ADAMTS1		TNFSF15	BMP1	PLXNA4		LGALS7
			SERPINB9	MMP2					HCFC1	ADAMTS10		VEGFC	CELA2A	PLXNC1		MBL2
			SERPINH1	MMP24					IGF2	ADAMTS13		WNT10B	CST11	PROL1		MUC19
			TGM1	MMP8					IL15	ADAMTS16		ZFP91	CST8	SDC3		MUC5AC
			TGM2	P4HA2					INHBB	ADAMTS17			CSTL1	SDC4		PLXDC1
			ANGPT1	PCSK5					LEFTY1	ADAMTS19			CTSF	SEMA3C		PLXDC2
			ANGPT4	PCSK6					LEFTY2	ADAMTS2			EGLN3	SEMA3D		PLXNA1
			ANGPTL6	PLAT					MDK	ADAMTS20			F12	SEMA4B		PLXNA2
			BMP10	PLAU					MEGF11	ADAMTS4			FAM20B	SEMA4C		PLXNB1
			CCL17	PLG					MEGF9	ADAMTS5			KAZALD1	SEMA4D		PLXNB2
			CCL18	SERPINB12					NODAL	ADAMTS7			KY	SEMA4F		PLXND1
			CCL23	SERPINB2					NRTN	ADAMTS8			LOX	SEMA5A		SDC1
			CCL25	SERPINB6					NTF3	ADAMTSL1			LOXL4	SEMA5B		SDC4
			CRLF3	SERPIND1					PDGFA	AMBP			MASP2	SEMA7A		SEMA3A
			CSF2	SERPINE1					PDGFC	BMP1			MMP16	SFTPD		SEMA3C
			CSF3	SERPING1					S100A14	CPN2			MMP24	A2M		SEMA3E
			CXCL8	SERPINH1					SCUBE3	CST3			OGFOD2	ADAM10		SEMA5A
			DHH	TGM1					SFRP1	CST7			P4HA1	ADAM11		SEMA5B
			EGFL7	TGM2					SHH	CTSA			P4HA2	ADAM12		SEMA6A
			EGFL8	TGM3					TDGF1	CTSD			P4HTM	ADAM18		SEMA6C
			EPGN	TGM4					TGFB1	CTSL			PLAT	ADAM22		ADAM12
			EREG	TGM6					TGFB2	CTSZ			PLOD3	ADAM23		ADAM15
			FGF23	TIMP3					TNFSF13	EGLN2			PZP	ADAM29		ADAM19
			FGF5	TLL1					VEGFC	EGLN3			SERPINA10	ADAM7		ADAM21
			FGF6	TLL2					VWC2	ELANE			SERPINA5	ADAM9		ADAM22
			FLT3LG	ANGPT1					WNT1	F13B			SERPINA6	ADAMDEC1		ADAM30
			GDF15	ANGPT2					WNT11	F2			SERPIND1	ADAMTS10		ADAM8
			GDF3	ANGPT4					WNT3	F7			SERPINE3	ADAMTS12		ADAMTS13
			HCFC2	BMP8A					WNT4	HABP2			SERPINI2	ADAMTS16		ADAMTS14
			HGFAC	CCL1					WNT6	HTRA1			SPAM1	ADAMTS17		ADAMTS16
			IFNB1	CCL17					WNT7B	HYAL1			SULF2	ADAMTS18		ADAMTS18
			IFNW1	CCL25					WNT8A	HYAL2			TGM2	ADAMTS19		ADAMTS19
			IL10	CCL26						ITIH1			TGM4	ADAMTS20		ADAMTS2
			IL12B	CCL28						LEPREL2			TLL1	ADAMTS3		ADAMTS20
			IL13	CCL5						LOX			TLL2	ADAMTS4		ADAMTS3
			IL15	CCL7						LOXL1			TMPRSS15	ADAMTS6		ADAMTS5
			IL16	CHRDL2						LOXL3			ANGPT4	ADAMTS9		ADAMTS6
			IL17B	CSF1						LOXL4			ANGPTL3	ADAMTSL1		ADAMTSL1
			IL2	CSF2						MMP10			ANGPTL6	ADAMTSL4		ADAMTSL4
			IL3	CSF3						MMP2			ANGPTL7	ADAMTSL5		ASTL
			IL4	CXCL12						MMP21			ARTN	CD109		CD109
			INHA	CXCL2						MMP23B			BDNF	CPN2		CELA3A
			INHBC	CXCL5						MMP24			BMP15	CST7		CPN2
			INSL6	CXCL8						MMP25			BMP2	CTSO		CSTA
			LIF	DHH						MMP28			BMP5	CTSS		CTSB
			MEGF11	EGFL7						MMP7			BMP7	CTSZ		CTSD
			MST1	EGFL8						MMP9			BRINP2	EGLN3		CTSW
			NRG3	EPGN						NGLY1			BRINP3	F12		FAM20A
			NRTN	FGF23						OGFOD1			BTC	F13A1		FAM20B
			S100A3	FGF3						OGFOD2			CBLN1	FAM20B		FAM20C
			S100A4	FGF5						P4HA1			CBLN2	HPSE2		HPSE
			S100A5	FGF6						PLG			CBLN3	HTRA1		HPSE2
			S100A6	FGF7						PLOD1			CBLN4	KAZALD1		HTRA1
			SCUBE1	FLT3LG						PLOD3			CCL1	KNG1		HYAL1
			SCUBE2	FSTL1						PRSS12			CCL17	KY		HYAL2
			SFRP5	GDF10						PRSS3			CCL2	MEP1A		HYAL3
			TCHHL1	GDF15						SERPINA1			CHRD	MMP13		KY
			TGFA	GDF2						SERPINA10			CSH1	MMP15		LEPREL1
			TGFB1	GDF6						SERPINA6			CX3CL1	MMP20		LOX
			TNFSF10	HCFC2						SERPINB11			CXCL10	MMP21		LOXL3
			TNFSF9	HGFAC						SERPINB6			CXCL11	MMP23B		LOXL4
			WFIKKN2	HHIP						SERPINB9			CXCL9	MMP24		MMP14
			WNT11	IFNA14						ST14			EBI3	MMP25		MMP2
			WNT3	IFNA5						SULF2			EDA	MMP28		MMP28
			WNT3A	IL10						TGM5			FGF12	MMP9		OGFOD2
			WNT4	IL12A						TGM6			FGF14	P4HA3		P4HA1
				IL12B						TIMP2			FGF18	PAMR1		PAPPA
				IL13						TMPRSS15			FGF20	PAPPA		PCSK6
				IL16						AMH			FGF9	PCSK5		PLOD2
				IL1B						ANGPT4			FGFBP3	PLAT		PRSS12
				IL20						ANGPTL1			FIGF	PLOD1		PRSS2
				IL3						ANGPTL2			FRZB	PLOD2		SERPINA3
				IL34						ANGPTL4			IFNA14	PZP		SERPINB1
				IL4						ANGPTL6			IFNA2	SERPINA1		SERPINE2
				IL6						BDNF			IFNA4	SERPINA11		SERPINF1
				INHA						BMP2			IFNG	SERPINA3		ST14
				LEFTY1						BMP4			IHH	SERPINB3		SULF2
				LEP						BMP7			IL11	SERPINB7		TGM1
				LTA						BMP8B			IL17D	SERPINE1		TGM3
				MEGF6						BRINP2			IL17F	SERPINE2		TGM6
				MEGF9						BRINP3			IL1F10	SERPINF2		TIMP3
				NTF3						CBLN1			IL1RN	SERPING1		TLL1
				PDGFB						CCL17			IL22	SERPINI1		TLL2
				PF4						CCL2			IL3	SULF2		ANGPTL2
				PIK3IP1						CCL21			IL34	TGM2		BDNF
				S100A11						CCL22			IL4	TIMP3		BMP2
				S100A4						CCL3			IL7	TLL1		BMP5
				S100A7L2						CHRDL2			INHBB	ANGPTL1		BMP6
				S100Z						CLCF1			LEP	BDNF		BMP7
				SCUBE1						CRLF3			LIF	BMP5		BMP8A
				SFRP5						CTF1			MEGF10	BRINP2		BRINP2
				TGFB1						CX3CL1			MEGF11	BRINP3		CBLN1
				TGFB2						CXCL11			NRG1	CBLN1		CBLN2
				TNF						CXCL12			NRG2	CBLN4		CCBE1
				TNFSF10						CXCL9			NRG3	CCBE1		CCL23
				TNFSF14						EGFL7			NRG4	CCL17		CCL28
				TNFSF15						FGF18			PDGFB	CCL19		CCL3
				TNFSF18						FGF21			PDGFC	CCL28		CCL4
				TNFSF8						FGF22			PDGFD	CCL3		CRLF1
				TPO						FGF23			PPBP	CCL5		CSF1
				WNT3						FGF3			PTN	CCL8		CSF2
				WNT3A						FGF5			RPTN	CHRD		CTF1
				WNT6						FGF8			S100G	CHRDL2		CXCL1
				XCL2						FGFBP3			SCUBE1	CNTF		CXCL10
										FLG2			SFRP2	CRHBP		CXCL11
										FST			SHH	CSF1		DHH
										GDF15			TCHHL1	CX3CL1		EGFL7
										GDF3			TGFA	CXCL12		FGF1
										GDF6			TNFSF10	CXCL2		FGF10
										GDF9			VEGFA	EGF		FGF12
										GDNF			VWC2L	EGFL7		FGF14
										HCFC1			WNT1	EPGN		FGF16
										HHIP			WNT11	FASLG		FGF18
										IFNA5			WNT2B	FGF10		FGF2
										IGF1			WNT3A	FGF12		FGF3
										IGF2			WNT7B	FGF13		FGF4
										IL11			WNT8B	FGF14		FGF5
										IL12A			WNT9A	FGF19		FGF7
										IL23A			XCL1	FGF9		FGF8
										IL24			ZFP91	FRZB		FGF9
										IL25				GDF10		FGFBP1
										IL34				GDF11		FGFBP3
										IL5				GDF15		FIGF
										IL6				GDF6		FRZB
										INHA				GDNF		FST
										INSL3				HGF		GDF15
										INSL5				HHIP		GDF3
										LEFTY2				IFNG		GDF6
										MDK				IGF1		GDF7
										MEGF10				IL10		GDNF
										MEGF6				IL12A		HCFC2
										MEGF9				IL15		HGF
										NRG3				IL16		HGFAC
										NRTN				IL19		IFNG
										NTF3				IL1A		IFNK
										PDGFA				IL1B		IGF2
										PDGFB				IL22		IHH
										PDGFD				IL24		IL11
										PGF				IL5		IL15
										PIK3IP1				IL6		IL19
										PRL				IL7		IL1B
										PTN				INHBA		IL25
										S100A13				KITLG		IL7
										S100A3				LEFTY1		INHA
										S100B				LEFTY2		KITLG
										SCUBE1				LEP		LIF
										SCUBE2				LIF		MDK
										SCUBE3				LTA		MEGF10
										SFRP2				MDK		MEGF11
										SFRP4				MEGF11		MEGF9
										SHH				MEGF9		NGF
										TGFB1				MST1L		NODAL
										TGFB2				NGF		NRG1
										THPO				NRG1		NRG3
										TNFSF10				NRG2		NRG4
										TNFSF11				NRG3		OSM
										TNFSF18				NRTN		PDGFA
										TNFSF4				OSM		PDGFB
										VEGFA				PDGFA		PDGFC
										VWC2				PDGFB		PGF
										WFIKKN2				PDGFC		S100A10
										WIF1				PGF		S100A2
										WNT1				PTN		S100A3
										WNT10A				S100A10		S100A4
										WNT10B				S100A11		S100A5
										WNT11				S100A16		S100A6
										WNT2				S100A7		SCUBE1
										WNT2B				SCUBE3		SCUBE3
										WNT5A				SFRP1		SFRP5
										WNT6				SFRP2		SHH
										WNT7B				SFRP5		TCHH
										XCL2				SHH		TGFA
										ZFP91				TCHHL1		TGFB2
														TDGF1		TNFSF10
														TGFB3		TNFSF11
														THPO		TNFSF8
														TNFSF11		TPO
														TNFSF14		VEGFA
														TNFSF15		VWC2
														TNFSF4		VWC2L
														TNFSF8		WNT1
														TNFSF9		WNT10B
														TPO		WNT11
														VEGFA		WNT16
														VEGFC		WNT3
														VWC2		WNT3A
														VWC2L		WNT4
														WFIKKN2		WNT5A
														WIF1		WNT7A
														WNT10A		WNT7B
														WNT11		WNT8A
														WNT2B		WNT8B
														WNT4		WNT9A
														WNT5A		WNT9B
														WNT5B
														WNT6
														WNT7A
														WNT7B
														WNT8A
														XCL1

## Sheet: TF direct targets (all genes)
All genes that are direct targets of longevity transcription factors
( https://maayanlab.cloud/Harmonizome/dataset/CHEA+Transcription+Factor+Targets )
CREB1	FOXO1	FOXO3	GATA1	GATA2	GATA3	GATA4	HIF1A	JUN	KLF4	MYC	NFE2L2	RELA	REST	STAT3	STAT5A	TP53
ABHD17A	DPP9	FLJ10038	TTTY3B	ACOX2	SPICE1	ATAD2B	SLC22A18AS	GJB7	MAGIX	ZNF699	DTHD1	C20ORF24	ZNF629	LINC00467	SNORA31	GCSAML
FBRS	SLC6A12	SNHG12	ZSCAN5A	MORN3	AHRR	CAB39	WDR5B	SRBD1	CAB39	C11orf97	C21ORF54	GNRH2	CMTR2	LRP5L	MLKL	ZNF621
MARCH6	MX2	MDN1	LOC148696	MMEL1	DPP9	MTIF3	BCL2L2	BID	AHRR	ACOX2	LOC100133050	TICAM1	MIR9-1	ACOX2	NMI	ADAM8
MDN1	MIR592	MLKL	LOC100130987	BAGE3	CMTM5	FBXL4	LINC00242	RTDR1	MRPL18	MORN3	CLDND2	RUSC1	CD19	MORN3	MRPL30	FAM150A
CMTR2	APOA5	TATDN3	LOC374443	FAM136BP	RCVRN	CCDC142	LINC00574	EHD3	MRPS15	MMEL1	MIR17HG	METTL2B	GAS2L3	MMEL1	TMEM186	NME9
CRLF2	FAM134B	COA6	TMCC1	CD19	SLC36A3	TMEM180	WISP3	ALDH8A1	FAM89A	SYN1	SLC22A18AS	C1S	AKR7A2	SYN1	PMM2	BTG4
UBALD1	SERPINA5	CAB39	SLC25A38	PTPRH	OXGR1	NMI	DPT	NDST3	GDPD3	ADAM1B	TATDN3	CD40	DHX34	ZNF629	CARD9	C10ORF111
MRPS18C	MAT1A	PTGR2	C12ORF43	CEP290	ASB14	PON2	FAM13A	ZP4	CCDC68	BAGE3	CEP290	EFHC2	BID	CECR2	IPO8	CCDC163P
RSL24D1	IGFBP1	VPS33A	C6ORF226	MSL2	CRH	COX6B1	C11ORF49	FAM89A	NEIL3	FAM136BP	COA6	MUC2	TMCC1	PTPRH	PLET1	FBXL19-AS1
MTERF1	ITPA	ZBTB49	ZNF419	CRLF2	FASLG	TDP1	MAB21L3	ZNF683	TMEM63C	RPL18AP3	BID	ZNF33B	SPICE1	C9ORF156	LYN	C1ORF122
MOCS3	RBM47	C6ORF226	LRWD1	C6ORF89	SLC5A10	MIEF2	TMEM183A	XPR1	CTH	FAM162B	TMCC1	DOCK10	SUCNR1	SLC35A5	CMTM5	FLJ37453
ZNF221	ELL	BCL2L2	IPO8	ZNF684	AMBP	NABP2	SLC28A1	EFHC2	RAB3C	ZNF705A	KLHL31	ICOS	KLHL31	ZNF221	MX2	LOC100131691
ATAD2B	D2HGDH	PIGO	ACE2	RRNAD1	CBLC	MRPS15	NT5DC1	ZNF33B	C1QTNF7	ACY3	MATN2	S100A6	HCLS1	ATAD2B	YIPF7	GNRHR2
OTULIN	GUCD1	RGPD3	FPR3	SOGA1	OPTN	LYN	PTPRN	COL6A3	NID1	NEIL1	PTGR2	IL17A	FBXL4	CAB39	INPP1	SNHG12
BCL2L2	NR0B2	TMEM8C	OR52A1	UBALD1	TRAF3IP1	SPA17	ZNF407	ALPK2	ERI2	MAGIX	ZSCAN12	FAM222A	SLC18A1	C3ORF38	ATRNL1	GNRH2
PIGO	SEPP1	NDUFAF6	ADAM21P1	CAB39	ACSL4	FAM89A	NDRG1	CCDC68	ACP2	ADAM8	MYCBP2	DIAPH2	PTGR2	MTIF3	FAM134B	CES2
MRPL18	BRAP	ZNF33B	MIR519A2	BID	RAP1A	CAMSAP2	RUNX1	CACNG5	IRAK2	MDN1	ALDH8A1	BTG3	USP37	ULK4	IKZF2	POLR2L
NABP2	AGXT	INTU	SNORA79	TMCC1	PPP4R1	PLSCR4	SERTAD2	DYNLRB2	SLC29A3	SOGA1	ALPK2	CYP7B1	AHRR	SRBD1	CP	GLB1L
MYH7B	PLG	IFT22	GOLGA8CP	PTGR2	TMIGD1	KIFAP3	SLC38A2	GPR116	ZDHHC18	UBALD1	ZNRF3	FASLG	AP3S1	ZNF121	TNFSF15	CLEC9A
MRPS15	NTSR2	YIPF6	C2ORF66	AHRR	LIN54	MAP9	CHD2	CHAC2	CBLC	MTERF1	DYNLRB2	TNFSF15	ZNF579	AKR7A2	CYP4F11	FBRS
SLC6A12	RDH8	DYNLRB2	RGPD3	DPP9	CREB3L3	ANKIB1	PARN	OXGR1	OPTN	CAB39	DCAF6	AFP	DPP9	DHX34	ST6GALNAC1	C2orf68
RXFP1	SLC22A14	INPP1	KIAA0125	TMEM241	PROC	SSPN	CUX1	TPRG1	TRAF3IP1	MINOS1	ENPP5	G6PC	MEI1	BID	MR1	LAMTOR4
WDR44	PTPRF	SUDS3	BRWD3	MRPL18	NXPH2	LNX1	ARID1B	FAM19A4	DDI2	BID	FGF7	ST6GALNAC1	NAGPA	TMCC1	IL33	CCDC30
IDNK	ABTB2	SULT1C3	FAM122C	ZNF708	VTN	PDE4B	UTRN	GPR151	ELL	TMCC1	CNTN1	CASP10	VPS33A	SPICE1	RBM47	MIR23A
YIPF6	NFIA	CLCA4	CCL18	IPO8	PNKD	DDR2	DAB2IP	GZMK	TEP1	SPICE1	ATRNL1	CYP19A1	PMM2	SUCNR1	IL17RE	MLKL
TMCO5A	CTIF	AKAP11	IFNW1	ACE2	PSMC4	FGL1	SLC2A1	NEIL3	SPC25	SLC18A1	FAM134B	ABCC6	GNPTG	KLHL31	CBLC	TATDN3
TMEM182	PCDH1	SQRDL	FNDC9	FPR3	GRAMD2	MLIP	AHNAK	APOA5	D2HGDH	OTULIN	KIFAP3	CCL20	TSR3	HCLS1	SAMHD1	CEP290
BBX	RREB1	BLMH	HIGD1C	OR52A1	TCIRG1	GSDMD	BHLHE40	GPR37	MPC1	AHRR	NALCN	KCNT2	ZBTB49	FBXL4	SNRNP27	MSL2
DCAF6	ZBTB16	TTLL2	CDY1	EMR1	ARHGAP9	HADHB	NCOR2	KHDRBS2	ECHS1	AP3S1	AKAP11	KLHL5	GPIHBP1	SLC18A1	SPTLC3	CRLF2
ENPP5	SLC22A23	FNIP2	DKFZP434L187	OR6N2	ACSM3	SIMC1	CLDN14	NEUROD6	GUCD1	ZNF579	SQRDL	AGT	MKRN3	DNAH6	LRCH3	SOGA1
FGF7	ST3GAL1	MAB21L3	LINC00032	TSPY4	CCDC54	TMEM183A	ELL2	ADAD1	HOGA1	NAGPA	ILDR2	TF	CHRNB2	PTGR2	CMC1	UBALD1
CNTN4	SOX6	ACP1	LINC00092	LYN	SNTG2	SNRNP27	ERRFI1	SUDS3	POMGNT1	MYCBP2	LEMD3	IGFBP1	NABP2	DPP9	CTSH	COA6
CRHR2	FOXN3	ERI2	LOC494141	ERICH6	LITAF	SPR	TNS1	TXK	LRP11	TMEM241	SSPN	ITIH2	OR2T8	NAGPA	MFSD9	MTERF1
ATRNL1	ATL2	RBM23	MIR548D1	RIC1	SH3RF2	SFXN5	MGAT5	IMPG1	ARRDC5	APBA3	SPP2	MMP3	ANKEF1	TMEM241	CALML3	ATAD2B
FAM134B	KLF3	ITPA	SNORD103A	GPRIN2	CORO2A	MAST2	IGFBP3	SYT4	CCDC93	MRPL54	LNX1	PLA2G4C	PLET1	NMI	SEPP1	CAB39
MAP9	TSKU	SLMO2	ULK4P3	ZNF683	MYCBPAP	AKT2	DAAM1	TMPRSS15	SORBS3	MRPL30	GPR85	C3	MSMB	MRPL30	UCP3	C3ORF38
SYT4	PPAP2B	CANT1	LOC100130691	PGLYRP4	HIC2	USP13	RAD51B	FASLG	NHEJ1	TMEM186	BLMH	C3ORF17	CD276	MKRN3	FAM83A	MTIF3
AKAP11	GRAMD3	IL33	MIR187	IYD	SLC25A28	PCOLCE2	FOXO1	PDE4B	RB1CC1	PMM2	RAB3C	ERI2	PGLYRP4	ZNF573	CHDH	ULK4
SQRDL	GNG7	RBM47	MIR200B	SLC38A8	ST6GAL1	PTGDR2	S100A10	RAB3C	USP43	GPKOW	SCARA5	RBM23	ANKAR	ZNF431	TRIM15	MPP7
LEMD3	MAD1L1	APMAP	SIRPD	NPY4R	WDR1	SPOPL	KLF10	IL20RB	KIF16B	SLC25A38	DDR2	CANT1	IFT22	RUSC1	ADIG	DPP9
SSPN	RXRA	CTNNBIP1	RTP5	XPR1	MYO3B	SPG21	KDM4B	MCCC2	NT5DC1	PGBD4	C6ORF106	GSDMD	B3GALT1	LUZP6	RASSF9	RPL26L1
SPP2	VAV2	SLC29A3	SNORA7B	EFHC2	PDE4D	DUSP13	PFKP	SLC10A6	PDLIM5	COG7	DNPH1	RBM47	RXFP1	METTL2B	RHBDL2	MYH7B
ARFGEF2	ELOVL5	DDI2	EMR1	MUC2	TGFBR3	FSD2	VGLL4	MR1	SELO	COX6B1	ABCC2	IQCD	GFRAL	OR6N2	CMYA5	DPH1
PDE4B	VPS13B	C2ORF83	OR6N2	SLC6A12	IGF1R	BOK	SCD	FAM3B	VWA1	ZNF223	AMBP	RND1	OR10W1	NDUFAF6	RAPGEF2	ACE2
RAB3C	IRF2BP2	PTAR1	FLJ34503	TEPP	ZMIZ1	LTBP3	EGLN3	MEP1A	LURAP1L	ZNF234	FETUB	PNKD	CACNG5	FAM89A	ZNF595	LOC100130691
ELMO2	TNS1	BTC	LINC00200	DOCK10	DISC1	ELF5	UBE2E1	AGT	USP13	BCL2L2	TRPM8	C1ORF86	MIR138-1	XPR1	TLR3	TMEM8C
KCNK18	SUGCT	CSF3R	PFN1P2	INTU	ZFPM1	RAPGEF2	NUP210	MRGPRF	CMC1	PIGO	IL33	RB1CC1	MIR592	ICOS	PRLR	MIR202
PLB1	TRIB1	CTSO	LOC493754	FAM212A	PRKCB	UBTD1	EGFR	ITIH2	WDR20	MRPL18	RBM47	USP43	DPY19L1	GADL1	SLC7A11	ALDH8A1
MCCC2	BCL6	DNASE1L3	MIR133A2	MAGEA8	DAPK1	ZNF595	ATP9A	C9	GAMT	ZNF708	ADSSL1	AQP4	LRRN3	INTU	CORO2A	NDST3
CEP128	MYO1E	SORL1	MIR609	OR52D1	FSTL4	EFNA1	FAM65C	ZBED9	ZC3H14	TDP1	CEP170	APOC3	FCRL5	NLGN1	LBP	C20ORF194
KIAA2018	MAP2K6	COG5	SCARNA1	SETMAR	GALNT10	EXT2	DHCR7	CBLC	CYP27A1	CHRNB2	PPP4R1	CHDH	MAGEA4	LIPM	ETV6	XPR1
MRGPRF	NAV2	D2HGDH	TSPY4	MC2R	DYSF	ART3	EVL	OPTN	TRIM15	CCDC157	SFXN5	EPO	BBX	IFT22	TNIK	DOCK10
TF	ANO10	ECHS1	TTTY18	FMO9P	APBB2	OTOS	HEY1	CEP170	SARS2	LRWD1	BTC	CYP3A5	FABP4	ALPK2	FLNB	ICOS
C3	NR3C2	LRP11	ZNF829	HTR2B	MB21D2	PTBP3	PFKFB3	WDR20	COL4A6	MIEF2	CTSO	TRIM15	PCSK1	ZNRF3	MBNL2	NLGN1
C9	ACACA	SPTLC3	TMEM8C	MIRLET7I	KAT6B	AVEN	ELMSAN1	FMO5	RFTN2	NABP2	DNASE1L3	RASSF9	PPP1R14C	XRRA1	NOS1AP	FAM212A
CIB4	CFAP20	LMO3	TUBAL3	ABCA10	SGMS1	INTS7	GADD45B	PRND	ACO1	NUDT17	MRPL33	SULT2B1	TRHDE	DIAPH2	PCDH1	ACKR1
ABHD1	WBP1L	RB1CC1	MIR202	PSKH2	DDC	HIC2	PLOD2	DUSP13	COL4A5	DPH1	SERPINF1	ABCA1	CCDC67	C15ORF53	MVB12B	CMTM5
CANT1	LCMT1	NR0B2	ALDH8A1	CRISP3	PTPRG	BCL9	RASEF	ZNF354C	PHKB	MRPS15	MAST2	ADRBK2	GLRB	TMCO5A	CD14	ITM2A
GSDMD	NOTCH1	FAM73A	NDST3	GCG	GNG7	MBNL2	TMEM45B	LTBP3	UBTD1	IPO8	BFSP2	ABCB1	HTR1F	CCDC68	ARHGEF10L	NYX
ACP2	KALRN	NT5DC1	OR2T8	RRH	CACNA2D4	TGFBR3	DSP	RHBDL2	ANXA2	CDY1	CEP135	UGT2A3	ADAD1	MC2R	ERGIC1	S100A6
IQCD	THADA	PDLIM5	OR2W3	FCRL5	TEX2	SMAD3	GBE1	REP15	LITAF	ANKEF1	TBCEL	CD40LG	CCNA1	CPA6	TSKU	DNAJC5G
RPS6KB2	SHB	ACSM6	ANKEF1	MAGEA4	TMED10	PRKAG2	TRAM2	ABCB5	PRLR	RGS13	MFSD9	CSAD	STAC	SIAH3	CD9	FAM107A
STAMBP	SIPA1L2	ATP5I	RGS13	ADCY10	ARHGEF3	RREB1	RAP1GAP2	APOH	EFNA1	AP1M2	ANKRD46	SLC16A5	RPL10L	OPN5	WWOX	LOC344967
APMAP	EGFR	SEPP1	HRH4	INPP1	LRRC8D	CACNA2D3	PDGFB	ATF7IP2	NDRG1	C1S	ENTPD5	ST6GAL1	UCP1	BTG3	ANK3	KRTAP5-2
PSTPIP2	DHCR7	BRAP	INSL6	CAMSAP2	SUGCT	PRKCE	SCARB1	C9ORF153	TUFT1	MPZL2	FAM69A	BCL3	LPPR5	HSD17B3	LPP	LIPM
KDM4A	ZAK	FOCAD	NDUFAF6	BBX	HERPUD2	ASAP1	MRPL14	ZNF254	MALL	FXYD5	STRBP	RCAN1	PLCXD3	NPFFR2	TEAD1	NCR3LG1
STXBP4	THRA	TRIM65	NOXRED1	FABP4	EEA1	SOX6	PPP1R21	ZNF680	ANXA5	LYN	ACO1	LBP	SLC24A5	WISP3	SLC44A3	GEMIN5
CBFA2T2	H3F3B	CHDH	TRIM48	DCAF6	DUSP10	AFAP1	WSB1	FMN2	RPS6KA3	PPP1R13B	CCDC54	SERPINA1	CRH	EFCAB10	TEAD4	COL6A3
FILIP1L	RNF144B	RFTN2	PLET1	ENPP5	GOLPH3	DYSF	PKP2	CDH9	PDE11A	CD40	CDH9	PTGES	IGSF11	YIPF7	SGK223	ALPK2
PRIM1	MET	ACO1	AP1M2	FGF7	ETV3	MACF1	FBXW7	RPS6KA3	SDC3	PTCRA	GORAB	ST7	CRHR2	DPY19L1	AGAP1	CCDC68
SAMHD1	PLCXD2	FMN2	SLAMF7	PLSCR4	SRPK2	ABLIM1	ZNF395	NOTCH2	NOTCH2	ERICH6	EXT2	MYH9	VWC2L	LRRN3	LMNA	TMEM182
ELL	SUSD1	GORAB	CD226	PPP1R14C	NF1	AFF1	C1ORF116	CNNM1	DTL	ZP4	SH3RF2	PDE4D	CNTN1	MIR190A	CAMTA1	BTG3
TMEM183A	SPTBN2	KLF17	TNK1	CCDC67	MAP2K6	FRMD4A	MARCH10	ABCB1	HIC2	FAM89A	ABCA4	ABTB2	SPERT	TPRG1	TEX2	HSD17B3
AASS	GHR	ABCA1	C1S	HTR1F	CSNK1E	FOXN3	SAP30	BCL3	KCNB1	SCN9A	SLC7A11	PCDH1	STMN4	FAM19A4	VPS13B	NPFFR2
CPN2	OAF	PLD1	CHST5	LPPR4	ITGA9	ATP1A1	ACOT6	BCL9	ST6GAL1	SLC38A8	TSPAN2	ZHX2	TMEM63C	NEIL3	SUGCT	MIR761
HMGCS2	ENPP6	ANXA2	MPZL2	MITF	UGGT1	ATL2	NOL3	MBNL2	BCL3	MUC2	ABCC1	MYB	DPT	LRRC66	MOB3B	WISP3
RND1	FABP1	PRLR	FXYD5	TXK	TCF3	CXXC5	ZC3HAV1L	PDE4D	RCAN1	INTU	ST7	PARD3	SHISA9	CAMSAP2	KLF6	CHAC2
PROC	KHDRBS3	EFNA1	PTTG1	CA1	PTPN12	KLF3	GRB10	EFNA5	ELMO1	NLGN1	ETV6	TCF7L2	ZNF831	BBX	BCL6	TPRG1
PPP1R1A	DUSP16	PROM1	LYN	CP	DCLK2	TGM2	PTPRM	ZFPM1	MYH9	ANKRD23	TBXAS1	ASAP1	GYG1	ACVR1C	EHD4	ADCY10
PNKD	SLC4A3	SLC7A11	PPP1R13B	NOX3	ZNF516	PITPNC1	MDGA2	AUTS2	MYO3B	GDPD3	MKL1	ST3GAL1	HCN1	CNTN4	SIPA1L3	FGF7
SORL1	KLF12	NOTCH2	RNF24	HAO1	MICAL3	EED	CYP1B1	GPC6	DLGAP1	GEMIN5	MYH9	FRMD4A	ATRNL1	GPR37	ARHGAP21	CNTN4
COG5	TNS4	PTBP3	PTCRA	ANGPT2	ALOX5	TNPO1	KCNMA1	SMARCA2	DTNB	XRRA1	PACSIN2	CXXC5	FAM134B	CLVS2	ST6GALNAC3	NEUROD6
PPP1R27	DHRS9	AVEN	ERICH6	ARFGEF2	MRVI1	ADK	ST8SIA6	CAMK1D	ABTB2	C1ORF53	TNRC6B	KLF3	KIFAP3	GABRA4	GMDS	TMEM196
AKT2	ZNF395	INTS7	ZP4	SCARA5	TNIP1	CHD2	IRX1	MYB	NFIA	SETMAR	DLGAP1	TGM2	MAP9	GABRB1	ITGB5	TRHDE
DENND4B	KIZ	HIC2	FAM89A	PLB1	GCLC	RCC2	EVX1	PRKCA	RUNX1	DYNLRB2	KIAA1217	CHD2	SUDS3	PCSK1	GAB1	CD200
D2HGDH	SC5D	ETV6	C20ORF194	IL20RB	MSRA	ANKRD11	CAV1	PRKCE	CHST11	MYOT	NOS1AP	TXNRD1	CA1	TRHDE	PRKCH	SCIN
MPC1	BPGM	FLNB	SCN9A	TNFSF15	SLC7A1	TRAPPC9	NR4A2	DAPK1	EFNA5	GPR151	ATXN1	TSKU	CP	CCNA1	CPNE8	CRHR2
LRP11	TGFBR1	PACSIN2	MSMB	MCCC2	STK3	CUX1	TLE1	FSTL4	IGF1R	ASB14	RUNX1	APBB2	POU1F1	STAC	UBASH3B	VWC2L
DNMBP	PTPN13	MYO3B	RIC1	CYP3A43	FAM213A	ARID1B	BMP4	SLC22A23	SMAD3	CRISP3	CHST11	ADAM19	SLC26A7	CCSER1	TCF3	SHISA9
GARNL3	DGKG	TGFBR3	GPRIN2	PLA2G12B	LGALS3	DLC1	BHLHE41	RNF144A	ZMIZ1	ACVR1C	EFNA5	SH3BP4	SYT4	LPPR5	NFIB	ZNF831
CCDC93	NCALD	MYB	ZNF683	FNIP2	SPPL3	SMYD3	SIAH2	FLI1	ZFPM1	CNTN4	SMAD3	UTRN	TMPRSS15	PLCXD3	RASGRP1	ANKRD45
SELO	CEBPA	PARD3B	PGLYRP4	ANPEP	LRIG3	MAGI1	PFDN4	VAV3	CBX4	GPR37	ZMIZ1	PSD3	NALCN	SLC24A5	MDFIC	ATRNL1
USP13	HIVEP2	PRKCE	IYD	MAT1A	MAPKAP1	MB21D2	BACE2	ASAP1	RREB1	KLHL1	CBX4	QKI	HAO1	CRH	RBMS1	CHST9
CEP135	SHROOM1	JAG1	SLC38A8	TET3	HLCS	PPAP2B	CLIC6	ST3GAL1	PPM1H	TMEM196	DLX2	TBL1XR1	RAB11FIP2	IGSF11	ZBTB10	PTPRO
NR2C1	TOX	FANCC	NPY4R	C11ORF49	AHR	MTUS1	ADM	AFAP1	CAMK1D	CLVS2	CTIF	MBP	CHRM2	CD200	LDLRAD3	NRG4
PSMC4	CYP24A1	RERE	XPR1	C2ORF76	HEY1	UTRN	SPRY1	PALLD	MYB	CCDC67	RREB1	AHNAK	PTPRO	SCIN	VPS53	SSPN
MSANTD4	LHX6	MVB12B	EFHC2	COLEC11	PFKFB3	ANK3	NAV1	CPNE5	CACNA2D3	CCNA1	PPM1H	BHLHE40	CLCA4	VWC2L	SLC2A9	DCBLD2
PDK2	EBF1	PTPRJ	MUC2	FAM208B	TNFAIP3	LPP	FAM110C	EPAS1	ARHGAP26	LPPR5	AUTS2	LMNA	NRG4	CNTN1	SERPINE1	ELMO2
C14ORF1	NRN1	GALNT10	SLC6A12	C20ORF196	TBCD	KAT6B	TSC22D2	MACF1	PARD3	CRH	GPC6	HSPG2	RAB3C	SPERT	ZNF366	DDR2
PPP1R32	NRP2	AFAP1	TEPP	CEACAM16	FRMD8	DDC	MAF	ADK	ARID3A	IGSF11	CAMK1D	SRCIN1	CD163	STMN4	MYADM	C1QTNF7
SLC46A1	TBX3	ABLIM1	DOCK10	NID1	CRYM	STARD13	STC2	CD9	NFATC2	CNTN1	CACNA2D3	NEK6	STOML3	TMEM63C	BDH1	KCNK18
TYSND1	GATA6	AFF1	GADL1	GPR171	LPIN2	RBMS3	P4HA2	LPP	GFOD1	ATRNL1	RBFOX1	AKAP13	SERPINA5	ZNF831	KLHDC7A	PLB1
GRAMD2	PLEKHG3	KLF3	INTU	MEP1A	ST18	TANC1	PNMA2	KAT6B	ZC3HAV1	FAM134B	LDLRAD4	NCOA7	SERPINA6	FAM134B	ZBTB34	IL20RB
TCIRG1	ATOH8	VMP1	NLGN1	TF	KCNK1	TRAF3IP2	INHBA	EXT1	PTPRJ	B3GALT2	DAPK1	NRXN2	SERPINA10	SUDS3	VGLL4	CYP3A43
PTPRN	PHLDB1	CTNNA1	FAM212A	IGFBP1	PTK2	SLC8A1	MICALL2	NEDD4L	ANO1	IKZF2	JAG1	IRF2BP2	LIN28B	IKZF2	SCD	NID1
PXMP4	PXDC1	DPYSL2	ACKR1	NXPE3	GLTP	LRIG1	SLC8A3	MYO10	ATL2	MITF	SLC22A23	WWC1	BPIFA3	MITF	ADAMTSL3	KIAA1958
PFN3	RAB20	ANKRD11	CMTM5	TOMM20L	SCMH1	SORBS1	PTPRB	LRIG1	FOXN2	TXK	CDYL	BACH1	CYP19A1	NOX3	PHLDA1	LIN28B
LIPA	MGLL	CUX1	ITM2A	BTBD16	FGF2	NXN	SLC9A9	MAD1L1	KLF3	CHST9	PLXNA2	TANK	FAM3B	CYP7B1	TBC1D8	ABCC6
BOK	NPY	HDAC4	NYX	SLMO2	NNMT	AGAP1	CGA	ELOVL5	COL18A1	DCDC5	ZBTB20	DUSP10	TPH2	NALCN	CMTM8	MPL
ZNF354C	TTC39C	SLC20A2	S100A6	GSDMD	UBTD2	MAD1L1	GJA1	CMIP	SERTAD2	NOX3	TCF7L2	IGSF3	AADACL4	RAB11FIP2	WIPF1	NXPE3
LTBP3	SOCS2	SLC25A13	FAM222A	ADSSL1	BRF1	LPIN1	DENND1A	ERC1	SLC38A2	SYT4	ZC3HAV1	NFKBIZ	SLMO2	CHRM2	SHB	TOMM20L
TENC1	USP29	SMYD3	CHM	CEP170	PRKAR2B	TBC1D14	SLC2A3	AKAP13	RCC2	TMPRSS15	ST3GAL1	CCND1	NR1H3	ANKIB1	SIPA1L2	C3ORF17
PSMD10	APBA1	ADAM19	DNAH17	PPP4R1	RAB31	VPS37B	SNAPC3	PPP2R5C	MPHOSPH6	CYP7B1	MACF1	FAM129A	STAMBP	FASLG	SEMA3C	ITPA
PRLR	SLC37A1	MAGI1	CPA6	PRIM1	ARL4D	LRRC8D	PRDM1	SFSWAP	TXNRD1	NALCN	ABLIM1	HIF1A	IRAK2	FAM13A	GNA14	AADACL4
NDRG1	WSB2	SH3BP4	DYNLRB2	TMEM183A	AKAP7	CTNND1	MSANTD3	FANK1	APBB2	HAO1	GALNT2	CD44	CEP170	PDE4B	SLCO2A1	SYCP2L
PROM1	LDHB	TBL1XR1	FMO9P	AASS	EHBP1	ATP10A	SEMA4B	RAPGEF1	MSI2	SULT1C3	ATL2	BCAR3	KDM4A	RAB3C	ZNF652	ABHD1
CORO2A	MYCN	EXT1	DPY19L1	AQP8	KTN1	OXR1	TMEM88	SUGCT	SPTBN1	RAB11FIP2	ADK	ZNRF1	STXBP4	SCARA5	INPP4B	SLMO2
KIAA1211L	FLRT3	STARD13	PPP1R14C	HFE2	GLYCTK	PRIM2	KCTD15	FBXL17	VMP1	CHRM2	RCC2	CDK6	AQP8	ELMO2	PLEKHG6	CANT1
INPP4A	TMEM184B	AHNAK	KIFAP3	CEP162	PPP1R21	SRSF4	PPP1R14B	OSBPL3	CTNNA1	PTPRO	TXNRD1	CFLAR	TMIGD1	DDR2	TRIB3	GSDMD
NOTCH2	TOB1	NXN	SH3TC2	ARRDC5	SPIDR	MAN2A1	INHA	EEA1	DPYSL2	CLCA4	PARN	PIK3C2B	HFE2	TNFSF15	STK24	IL33
DTL	PDK4	EPB41L1	MITF	CCDC93	ODC1	TRIB1	CCNL1	PRIM2	CD9	ANKIB1	TSKU	NAV2	LIN54	MCCC2	ZNF609	RBM47
HIC2	ACAA1	PDE8A	CA1	SORBS3	ADCK1	BCL6	GLTSCR2	AXIN2	WWOX	SSPN	VMP1	ARNT2	CREB3L3	SLC10A6	MFSD12	MYO7B
CHPF	AMFR	BHLHE40	NALCN	WBSCR28	SLC4A8	ITPK1	MAP1LC3B	TRIB1	SLC25A13	SPP2	CTNNA1	PRKCH	RND1	LOC392145	RCAN3	ACP2
CNNM1	SNX10	NCOR2	SQRDL	WDR20	CREG2	ZNF710	LONP1	BCL6	COBL	MSR1	CD9	IL7	PROC	ZNF607	XDH	NR1H3
SLC25A28	SEMA4B	SETD7	ILDR2	TBCEL	SGCD	RELL1	KXD1	SLC1A3	ADAM19	BLMH	ARID1B	PDE10A	NXPH2	TTLL2	IER3	IQCD
CERS6	GCM1	KIAA0232	CALCRL	ZC3H14	GPR110	IGSF3	NCOA3	KLF7	MAGI1	SCN7A	SNX29	MMD	VTN	LAMB4	FAM210B	SAMD8
FLNB	ABCG8	CMIP	DCBLD2	ANKRD46	SV2B	MREG	PNPO	CELF2	PPAP2B	ELMO2	MAMDC2	ST8SIA1	PNKD	CEP128	PDE9A	STAMBP
WDR1	TMEM140	ERC1	BLMH	NR2C1	TNS4	ZEB2	TMEM18	WDR70	UTRN	LRRC55	UBR5	NCAM1	SFXN5	KIAA2018	PTPRK	CTNNBIP1
MBNL2	KLF15	NCOA7	CR1	PSMC4	ATP2B4	NFKBIZ	CLN5	PKD1L2	SGK1	MCCC2	SLC20A2	UGGT1	SIRT7	MR1	USP46	ADSSL1
MKL1	RNPEPL1	VPS13B	CYP3A43	ACSM5	PIK3C2A	CELF2	CLK3	CCND1	SLC44A1	ANPEP	MB21D2	PTPN12	BTC	SLC22A11	CDC27	PSTPIP2
MYH9	LEMD2	ERRFI1	G6PC	AQP7	STOX2	RGL1	RSBN1	FAM129A	TBL1XR1	FER1L5	UTRN	VEGFC	CSF3R	CEACAM16	TBC1D5	NDUFA11
PACSIN2	BANP	SFSWAP	ZNF141	PFN3	SMARCA5	MKL2	ANKRD37	CD44	EXT1	SLC5A10	RND3	DPP4	DNASE1L3	BCHE	KIAA1551	SEPN1
TNRC6B	RPS14	TBC1D2	ANPEP	PLIN4	LAMC1	SRPK2	PPP2R1A	GLI3	LARGE	SERPINA6	SGK1	E2F3	SORL1	LIN28B	MDM2	CBLC
MYO3B	MAP1LC3B	CTNND1	BTN3A2	PLIN5	ATN1	FAM129A	COX20	ITGB5	SLC44A3	AHSG	ANK3	NR3C1	AKT2	GPR171	RASEF	OPTN
THSD4	LRSAM1	BACH1	CASP10	ENTPD5	FAM160A2	PIK3C2B	POU2F1	ADCY2	TSPAN9	FAM208B	LPP	ALOX5	GUCY1B2	NEK10	PLCXD2	TRAF3IP1
ABTB2	RPL37A	PARK2	C20ORF196	BBOX1	MARCH10	NAV2	TFRC	GPR133	AHNAK	C7ORF49	KAT6B	CPLX2	LRP11	CPB2	FRK	CEP170
RUNX1	ISY1	TRAK1	TPH2	CLDN15	MYT1	DOPEY2	MTCH2	MDGA1	EPB41L1	SERPINA10	TBL1XR1	PIK3AP1	SPTLC3	FGA	CREB5	PPP4R1
ZMIZ1	METTL14	ATP10A	ROS1	CALML3	ORC1	SDC1	KDM3A	KSR1	PDE8A	AMBP	DAB2IP	TAF1B	DNMBP	FAM3B	NIPAL2	KDM4A
PRKAG2	CCNF	TANK	C9	FAM69A	OASL	RAI1	NCOA5	CERK	BHLHE40	SDC2	EXT1	ZBTB10	GARNL3	MEP1A	TRAM2	DDI2
CBX4	SLC25A33	OXR1	MPL	SEPP1	SQLE	LRRFIP1	KDM5B	LRRFIP1	NCOR2	ACP1	SGMS1	THBS1	VWA3B	TPH2	EML1	ELL
DLX2	GTPBP4	CHD1	FRRS1L	UCP3	ZNF207	PHACTR2	SPAG4	CPNE8	MAD1L1	CEACAM16	DDC	GCNT1	SORBS3	MORN5	PPP1R3B	SIMC1
CTIF	RNF135	AXIN2	CANT1	BRAP	VAMP3	RGS6	CRKL	LRBA	RXRA	EMC1	SLC2A1	BCL2L1	LMO3	ROS1	B3GALT5	TMEM183A
ZHX2	ANKRD27	KLF6	IL33	TMEM72	BCO1	NRIP1	MAX	ADARB2	CAMTA1	LIN28B	MBP	MANBAL	CEP135	MPL	TNFAIP8L3	SPR
SSBP2	RBPMS	TRIB1	IRAK2	FOCAD	RBBP6	NFIB	RAI14	TJP1	DLGAP4	C3ORF17	STARD13	VPS53	TBCEL	NXPE3	DCLK1	LIN54
CTNND2	KLF9	TIAM1	ADSSL1	CCDC27	CLU	PTPN12	ENO1	ADD3	CLDN14	CIB4	RBMS3	S100A10	PRND	TOMM20L	PRKAR2B	CPN2
SLIT3	MIDN	KLF7	PSTPIP2	LYPD6	SLC36A1	SESN3	TPD52	GPC5	RPS6KA1	F7	TANC1	ETS2	NR2C1	CANT1	ACPP	PGF
RBFOX1	BAIAP2	ZNF608	RAP1A	SPG21	WNK2	NUAK1	FAM129B	IL7	VPS37B	ZBED9	RGS3	TNIP1	PPP1R32	IL33	DSG2	PNKD
PRKCB	FOXO3	MKL2	AQP8	TARBP1	INA	IGF1	CITED2	FAR2	TMED10	ERI2	SLC44A3	ITPRIP	PTPRN	RBM47	ADCK3	PDE6G
PHACTR1	ID3	ZNF507	CPN2	AGXT	ADAP2	ABHD4	UBC	NR3C2	RASSF3	ITPA	GLI2	DENND3	LYPD6	MYO7B	TXLNB	SIRT7
ARHGAP26	TGIF1	DOCK2	CREB3L3	PLG	CLSTN1	BTBD3	DDIT4	ADAM23	LRRC8D	QRSL1	PDE8A	DUSP5	NTSR2	RPS6KB2	HDDC2	SORL1
PARD3B	ZFP36L1	FBXO11	PNKD	LIPA	WNT2B	SYTL2	RBPJ	PLCG2	FANK1	SLMO2	SGK223	MAML2	RDH8	SAMD8	PCTP	COG5
ZBTB20	GSE1	FAM129A	SFXN5	RDH8	SPOCK3	PLCB4	ZFP36L1	FHOD3	WWC1	CANT1	NCOR2	KLF10	ENTPD2	STAMBP	ODC1	MRPL33
TCF7L2	SLC29A1	NR6A1	CSF3R	FAM83A	NELL2	RBMS1	MAFK	CDC42EP3	RAPGEF1	IRAK2	SETD7	SERPINE1	ABAT	CTNNBIP1	PMP22	TEP1
RERE	XBP1	BCAR3	DNASE1L3	PNOC	SHISA6	SNX30	GSE1	DCLK2	SUGCT	CBLC	RXRA	ZNF366	EMCN	SLC29A3	SLC22A5	SPC25
PPP1R16B	OSBPL1A	ITGB5	CEP162	FSD2	ESRRB	DAAM1	OTUD7B	VEGFC	WASF2	STRIP1	LMNA	SLC25A37	CYP3A5	PSTPIP2	ADCK1	ACSF2
VAV3	TBC1D13	STAM	RILPL1	BOK	GRB10	MICAL2	PDK1	GPC4	HERPUD2	CEP170	LPIN1	GCLC	LRRC16B	RAP1A	TLR4	CXCL17
ASAP1	EIF1	CPNE2	GUCD1	ABAT	WNT7B	MICAL3	PARD6B	GPD2	MBOAT2	PPP4R1	TBC1D14	MYADM	DACH2	CBFA2T2	SEMA3E	SERPINF1
PTPRJ	RASSF1	HIVEP3	LURAP1L	EMCN	POU3F1	CDK5RAP2	HK2	KAT2B	ATP10A	KDM4A	NCOA7	RFX2	ACO1	PRIM1	NAV3	REEP4
ST3GAL1	PIM3	RIN3	BFSP2	CYP3A5	GALR1	E2F3	AKAP12	ABHD4	MEGF9	DDI2	ARHGAP18	CSF1	FMN2	SAMHD1	GULP1	PKD2L1
GALNT10	PTPN1	CPQ	WBSCR28	SULT2A1	TMCC3	NR3C1	SOS1	CPEB4	CHD9	ELL	LRCH1	PFKP	KLHL8	AASS	TMTC2	PPP1R27
TRIO	OSER1	PHACTR2	CMC1	TRIM15	NR5A1	LHPP	DYNLL1	E2F3	EEA1	HADHB	IRF2BP2	CTSB	ZNF407	AQP8	MOCS2	RILPL1
LIPC	SLC45A1	SCRN1	WDR20	ADIG	CDKN1C	GTDC1	RAN	SFXN1	TANK	TMEM183A	CTNND1	LGALS3	ACVR1	TMIGD1	ACKR3	DDB2
DNM3	DEDD2	MAN1A1	GAMT	RHBDL2	FOXO6	SERINC3	PNRC1	MRPS27	DUSP10	SNRNP27	STON2	TSNARE1	KBTBD12	HFE2	GPR110	SLC28A1
AFAP1	WDR5	UBASH3B	PTGDR2	CMYA5	CDH13	H2AFY	MAPK6	CHCHD3	KLF6	SPR	FBXL17	BCL2	IL21	LIN54	SLCO4C1	MAST2
ANO1	TP53	FURIN	CEP135	TENM1	PTPRT	CDK19	SRSF3	EXOC4	ETV3	TMIGD1	OSBPL3	DDR1	SPACA7	CPN2	PLEKHA6	TRAF3
SH3PXD2A	CUEDC2	MMD	TBCEL	KATNAL2	UNC5D	HIP1	FAM162A	DUSP5	ITPK1	HFE2	MEGF9	GRK5	SPATA16	CREB3L3	FEZ2	BCL2L10
TSHZ2	FNDC3A	PPA2	ZC3H14	SARS2	MAB21L1	THBS1	RAPGEF6	CD109	RELL1	CPN2	BICD1	TPCN1	BATF	PGF	STC1	GARNL3
ABLIM1	AZIN1	DOCK8	CYFIP2	SULT2B1	UNC5C	UBE2H	DNAJB6	SERPINE1	TIAM1	HMGCS2	EEA1	PHLDA1	SEC16B	RND1	TPD52L1	MICA
FOXN3	DYRK1A	NRIP1	SYTL3	C15ORF41	RYR2	DIP2B	FOS	RFX2	GSK3B	CREB3L3	CDC42BPA	KRT18	GORAB	PPP1R1A	C1orf116	SRSF8
VPS13D	SGOL1	TCF3	FMO5	STRBP	GRID1	URGCP	AGPAT5	RASGEF1B	IGSF3	PGF	FAM53B	NRCAM	RAPGEF2	SERPINF2	PIK3C2A	TMEM19
ATP1A1	VPS36	PLCG2	MSANTD4	GC	B4GALNT2	JADE1	ANO6	SORCS2	MREG	RND1	OXR1	EGFR	PHKB	NXPH2	STOX2	ARRDC5
ATL2	RASIP1	RASGRP1	SLC46A1	ATF7IP2	HOXB4	PPARGC1A	DARS	DOCK1	SLC1A3	PROC	BTG1	LHFPL2	UBTD1	VTN	ZNF395	FNDC7
MTHFD1L	EIF4EBP2	SLC6A1	CALML3	ACVR1	FOXD2	PFKP	KMT2E	PFKP	ZNF608	NXPH2	C1GALT1	ATP9A	KLF17	PNKD	ATMIN	NHEJ1
SERTAD2	ZFAND6	ABHD4	FAM69A	KBTBD12	EN1	VGLL4	RNF19A	SBK1	ZEB2	PNKD	GOLPH3	RARRES1	SNTG2	SFXN5	LPO	PRDM5
SLC38A2	TXN2	ZNF516	SEPP1	SPATA16	CHST8	ZNF91	MAML1	UBE2E1	STAG1	SFXN5	EFCAB2	OPRM1	PRLR	PDE6G	WDR11	LRCH3
ADK	PRKAB2	CDK5RAP2	UCP3	BATF	HS3ST3B1	ELF1	PKM	DAG1	CCND1	PDE6G	MAN2A1	PLEKHG6	SLC7A11	SLC39A5	STEAP4	FAM73A
CHD2	IREB2	CPEB4	CCDC27	COL4A5	RNF220	MAP3K1	CCNG2	WASF3	GLI3	SIRT7	AXIN2	CDH23	ART3	SIRT7	TMEM144	KIF16B
RCC2	ARPC2	PRR5	TARBP1	SEC16B	HOXC13	DAG1	PPM1D	ZCCHC14	BCAR3	ASGR2	KLF6	TNFAIP3	INPP4A	ASGR2	DEPTOR	PMM1
MPHOSPH6	VPS41	PIK3AP1	PLG	GORAB	PAX1	KLF11	PPP1CB	STK17B	ZNRF1	TAS2R38	TRIB1	UNC13D	NOTCH2	TAS2R38	PARP16	PDLIM5
ERGIC1	MRPL28	TAF1B	LIPA	RAPGEF2	C3orf70	PWWP2B	VRK1	AMPD3	MAN1C1	C17ORF96	BCL6	ABR	PTBP3	C17ORF96	ST3GAL3	LURAP1L
TMEM2	UNG	ZBTB10	NTSR2	PHKB	HOXA10	SIPA1L1	KDM4C	MYT1L	HIVEP3	MRPL33	CEBPB	BCL9L	AVEN	C2ORF83	ZDHHC7	BFSP2
MDM4	CYCS	TBC1D16	FAM83A	UBTD1	CRABP1	AMPD3	AKAP10	YPEL5	INF2	ZNF771	PIK3CD	NFKB1	VPS13C	CETP	METTL13	WDR20
TXNRD1	NAMPT	CFAP20	FSD2	KLF17	PAX6	PIP5K1B	GDF15	BMP2K	CD82	DDB2	FAM102A	IER3	DTL	PTAR1	SLC5A1	GAMT
PARN	STAB2	FOXO1	ABAT	SNTG2	GATA6	MBNL1	GAPDH	STRN3	GNG12	SLC28A1	MREG	ELMSAN1	HIC2	CSF3R	EXTL1	PTGDR2
MSI2	LIFR	H2AFY	EMCN	ZNF595	MEIS1	ST3GAL5	ITFG2	KALRN	PRKCH	TRAF3	CELF2	PTP4A2	CHPF	CTSO	ACOT1	TCP11L1
VMP1	PPID	B4GALT1	CYP3A5	PLD1	PLEKHG3	FHL2	FUT11	SHB	LRRFIP1	GUCD1	GMDS	SLC25A45	SLC26A5	DNASE1L3	STAC2	TCIRG1
ANKRD11	TMEM243	CDK19	SULT2A1	ABCA4	CLDN3	SLC7A1	C1D	CEP112	HNF1B	GARNL3	MYO1E	GADD45B	CNNM1	COG5	DPP6	PTPRN
TRAPPC9	RMND5A	HIP1	TRIM15	MAST4	DLL1	ACOXL	DDX50	ATP8A2	UBASH3B	ARRDC5	IGFBP7	H3F3B	KCNB1	TEP1	MDGA2	LOC102723545
CDKAL1	TOMM40	CNKSR3	GC	PCSK5	DLX4	SLC44A2	BZW1	PIEZO2	PDE10A	FNDC7	BCAR3	PHLDB2	SLC25A28	SPC25	GALNT3	RNASE13
HDAC4	ILVBL	POC1A	TP53TG1	HPGD	MLLT3	FNDC3B	GUK1	FAM84B	DOCK8	CCDC93	ANKRD44	APP	SLC16A5	DDB2	CYP1B1	UCP3
SLC25A13	ALAS1	NLK	ABCB5	LMOD3	COL4A1	CRISPLD2	UBE2V2	LRIG3	RSRC1	SORBS3	ANO10	MYLK	ST6GAL1	MAST2	STXBP6	CCDC27
COBL	SQSTM1	THBS1	ZNF254	SLC7A11	HPCAL4	DDR1	ALKBH5	NTN4	ADAM23	LMO3	INF2	BFSP1	BCL3	TRAF3	TBC1D4	LYPD6
GLDC	SH3YL1	BCL2L1	ACVR1	CORO2A	LRRN4	SYNJ2	NUPL1	MLPH	RPS6KA2	NHEJ1	ZMAT4	GSN	PTGES	AKT2	SEMA6A	SPG21
LPP	AHCY	MANBAL	KBTBD12	AKNAD1	SPSB4	MED13L	CDC73	FAM126A	NCAM1	RB1CC1	LMO1	NDST1	PTPRF	DENND4B	NR4A2	TARBP1
KAT6B	AMDHD1	S100A10	IL21	MERTK	NFATC1	SHB	LDHA	QPCT	UGGT1	NR0B2	CPNE8	RBKS	BCL9	LRP11	TFAP2C	NTSR2
TEAD1	ELF2	DOCK5	SPACA7	KIAA1211L	KIAA1804	CACNA1D	FEM1C	SDPR	EPHB4	PRDM5	LRBA	SCNN1A	PRKCZ	DNMBP	GRHL2	RDH8
EXT1	GPD1L	ETS2	SPATA16	LIMD1	NAGS	RABGAP1L	VDAC1	RASGRP3	TCF3	ZNF334	MAGI3	NNMT	ABCC1	CEP152	CITED4	SLC22A14
SGMS1	NAA20	ITPRIP	UBTD1	ART3	RFTN1	MPDZ	HILPDA	PLEKHG6	NFIB	LRCH3	ADD3	FABP6	ST7	VWA3B	NRP1	DUSP13
DDC	SLAIN2	DENND3	ABCA1	OTOS	DUSP2	NBEA	NARF	HEY1	PDGFA	PMM1	MAN1A1	TLL1	ELMO1	RB1CC1	OTOP1	MYH7
SLC2A1	MGAT4B	DUSP5	LITAF	TSPAN2	SGCB	FBLN2	SUMF1	PTPDC1	PTPN12	PCOLCE2	GPC5	FOXK1	PPP3CA	CMC1	SNTB1	MYO7A
RBMS3	OTUD4	SLC25A37	ABCA4	SDC3	GP5	EVL	RAB6A	SEC24D	SESN3	GAMT	IL7	NFIC	TBXAS1	WDR20	PARP8	GC
FAM49A	BLM	VEGFA	HPGD	INPP4A	ESRP2	SORBS2	TM2D3	SH3TC1	FHOD3	SLC46A1	GYPC	ANKRD9	FLNB	TBCEL	THBD	OPRK1
GLI2	RANBP10	BDH1	SLC7A11	AVEN	SLC30A2	PAM	WDR60	CELSR1	ROR2	TYSND1	LRP8	PDGFB	WDR1	LAMP2	DPF3	CYP3A7
MYO10	ATP6V1A	TAPT1	SDC3	VPS13C	ADAMTS5	STIM2	SLC35E1	VWF	CDC42EP3	TCIRG1	SH3BP5	ITGB2	ANKH	SPOPL	NPAS2	DACH2
AHNAK	TECR	KLHDC7A	NOTCH2	DTL	CXCL14	SDPR	GOLGA1	SLC25A45	DCLK2	BBOX1	MMD	FLOT2	MYO3B	C15ORF27	IRF2	PASD1
NXN	DUSP14	ZBTB34	PTBP3	SLC26A5	REM1	RASGRP3	DNM2	LCORL	LAMC2	FAM69A	ADAM23	CD86	UPP2	PSMC4	IL15RA	TP53TG1
PDE8A	CNIH1	SLC25A26	AVEN	ST6GAL1	P4HA2	RAB8B	NAMPT	SNX24	VEGFC	SEPP1	RPS6KA2	TNFSF10	DLGAP1	PLIN4	SLC39A8	SMARCA1
NCOR2	RMI1	TP53INP2	VPS13C	BCL3	SLC7A2	ZAK	TRIM33	TBC1D5	GPC4	UCP3	CDC42EP3	CCL17	DTNB	S100A16	FERMT1	COL4A6
AGAP1	SLX1B	TEX14	DTL	RCAN1	NGEF	OSBPL5	FBXO42	DEXI	NUAK1	BRAP	IGFBP3	HNF4A	PDE4D	A2M	PLEKHH3	RFTN2
GNG7	METAP2	SLC1A5	HIC2	PTPRF	SMOC1	CMTM3	UBA6	TMEM38B	RASGRP1	FOCAD	DCLK2	RBM17	BCOR	CYP8B1	NAT8L	KLHL8
MAD1L1	PAFAH1B2	YWHAQ	CHPF	BCL9	RIPK2	TBCD	IBA57	ANTXR2	SLC6A1	CCDC27	LAMC2	EHBP1	EFNA5	F13A1	KCNK6	MYOM3
RAB11FIP4	RBM34	DAP	SLC26A5	ABCC1	PLA2G2D	UVRAG	KLHDC4	VLDLR	SPRY4	LYPD6	VEGFC	KTN1	IGF1R	C15ORF41	RGMB	ZNF407
ELOVL5	HEATR5A	ALOX5AP	CNNM1	ST7	GABRG3	TK2	NTHL1	ARHGAP24	GPD2	SPG21	NUAK1	ADCK3	SMAD3	CYP2J2	LPGAT1	ACVR1
LMNA	ASAP3	SIPA1L1	KCNB1	CERS6	TRPC5	BCL9L	RASSF7	LOXL4	KAT2B	TARBP1	MDFIC	ANKRD28	ZMIZ1	STRBP	ESRP2	KBTBD12
HSPG2	NEIL2	AMPD3	SLC25A28	ETV6	SLC6A11	NFKB1	DYRK1B	RNF144B	LAMB1	PLG	IGF1	LINC01465	ZFPM1	GC	GPRC5C	IL21
RARA	ITM2B	YPEL5	ST6GAL1	ELMO1	RXRG	DKK3	ILVBL	ETS1	KRT8	NTSR2	ABHD4	BLNK	CTIF	SMARCA1	SLC30A2	SPACA7
CAMTA1	PCGF3	PTPRA	LBP	TNIK	RCSD1	ELMSAN1	MBTPS1	MYLK	SYTL2	RDH8	ZNF516	RAPH1	PCDH1	COL4A6	LMO4	SPATA16
DLGAP4	C1orf50	FAM213A	PTPRF	FAM107B	ACADL	LPIN2	JMJD6	CRIM1	CDK5RAP2	CYP27A1	BTBD3	NRG1	RREB1	RFTN2	ADAMTS5	COL4A5
MARK3	ZFAND4	CLMN	BCL9	ANKRD55	ITGA7	EVI5	RNF126	DFNA5	SERINC3	MYO7A	WDR75	TP63	PPM1H	ABCB5	LEPREL1	SEC16B
IQSEC1	NMRAL1	DLG5	PRKCZ	FGD4	MAP10	INSR	MIF	CLDN1	STRN	TRIM65	CDK5RAP2	SYT1	SSBP2	APOH	GRAMD1B	GORAB
CMIP	RAD9B	ERN1	ABCC1	TBXAS1	TTN	TAMM41	ALDOA	ITGA2	TLE4	BOK	NR3C1	TMTC2	AFF3	ACO1	SLC41A2	RAPGEF2
MYH10	UGGT2	XYLT1	CERS6	TNFAIP8	SPARCL1	BAG3	KIAA0195	KCNIP4	ADRB2	LTBP3	RAD51B	DPYD	CTNND2	KLHL8	RAB3IP	UBTD1
RRBP1	MED27	DDR1	ETV6	WDR1	TMEM154	ITGA6	ALOXE3	NIN	THBS1	TRIM15	NUBPL	KLF4	CACNA2D3	ACVR1	STC2	SNTG2
ELL2	ALDH1L1	CMTM8	ELMO1	MKL1	OPRD1	SNX24	PGAM1	B3GALT5	GCNT1	SARS2	PMS1	ITGB8	MYRIP	KBTBD12	PERP	TLR3
PPP2R5C	ALPK3	RHBDD1	PPP3CA	MYH9	PREP	LMO7	TMEM189	KHDRBS3	GLIPR2	SULT2B1	STRN	AP1S3	CSMD1	IL21	SOCS2	PLD1
SYK	DNAJC11	CACNA1D	TNIK	PACSIN2	WSB2	SLC22A2	NFKB2	DPYSL3	ETS2	SLC25A6	TLE4	BBC3	RBFOX1	SPACA7	HR	ANXA2
NRXN2	PIGL	SLC2A12	ANKRD55	TNRC6B	RNF32	SYNE1	KRT19	FAM19A1	CD109	STRBP	CDK19	TAPBP	PRKCB	SPATA16	ERBB2IP	EFNA1
TEX2	CD28	GPR126	FGD4	ANKH	SLC38A4	TBC1D5	ITGA5	SBF2	PXN	OPRK1	GCNT1	C1ORF116	ZBTB16	BATF	ITGA1	NDRG1
VPS13B	IFNGR2	LHFPL2	TBXAS1	PCSK6	ARID5B	DYM	PC	CNTNAP2	BCR	ABCB5	MRVI1	CFB	LDLRAD4	RAPGEF2	CAV2	MAST4
CUEDC1	POR	FAM65C	TNFAIP8	MYO3B	ACVR2A	GALM	ANGPTL4	DNAH11	PIP4K2A	APOH	DOCK5	CYB5A	PHACTR1	PHKB	ATP8B1	AKNAD1
IRF2BP2	TPST2	DHCR7	FLNB	UPP2	AEBP2	FXN	LRP1	GALNT13	KLF10	ATF7IP2	ETS2	HMOX1	ARHGAP26	UBTD1	NGEF	MERTK
ERRFI1	RASSF6	RIN2	WDR1	DLGAP1	MYBL2	RRAS2	RDH11	TMEM98	WBP1L	C9ORF153	TNIP1	WDR11	PARD3	SNTG2	FAM114A1	ANXA5
VPS37B	UNC119B	YPEL2	MBNL2	PDE4D	MLLT6	KIAA1551	FNTB	GSG1L	UBE2V1	ZNF254	ITPRIP	SNAP25	PRKCA	ZNF595	TRIM36	TPST1
PHLPP1	NAGLU	EVL	MKL1	SOX5	EMB	DEXI	MTFP1	PHF2	GCLC	ZNF680	DUSP5	PPTC7	PRKCE	ABCA1	KCNJ8	ART3
CTNND1	C1orf210	CBLB	MYH9	KIAA1217	UBA3	TMEM38B	BLCAP	BSN	SORCS2	ACO1	MAML2	HGF	DAPK1	PLD1	GPM6B	INPP4A
WWC1	UOX	SDPR	PACSIN2	THSD4	ARSA	PHLDB2	SMC2	FAM19A5	DOCK1	FMN2	SERPINE1	ARID2	FSTL4	MAST4	EDN2	VPS13C
WASF2	C10orf107	PLXDC2	TNRC6B	ABTB2	SLC6A7	PRSS23	MRPS18A	ADAM12	MSRA	SOCS6	EPB41	WWP1	JAG1	PCSK5	PLK2	BCL3
HERPUD2	RABGEF1	ATRN	ANKH	NFIA	CAPNS1	SMARCD3	BCCIP	KCNJ6	PDIA5	MYOM3	GCLC	PJA2	SLC22A23	HPGD	SLC1A6	RCAN1
OSBPL3	TNFRSF1B	SPATA13	PCSK6	TGFBR3	OGT	RNF144B	OXSR1	DRD1	TEX14	ZNF407	TTLL11	IKBKB	CDYL	LMOD3	UPB1	PTGES
PARK2	DGAT2	USP31	SLC24A3	BCOR	GJB5	MYLK	BRK1	KCNQ3	DNAH8	ZNF595	GRIK4	CBR3	PLXNA2	CORO2A	ACSS1	PTPRF
OXR1	STARD10	THRA	MYO3B	RUNX1	TAC4	PTK2	FBL	SORCS1	RBFOX2	LITAF	VEGFA	CYP27B1	ZBTB20	OTOS	USP25	CERS6
BTG1	F10	TRIB3	UPP2	CHST11	DPPA2	ERBB4	SEC61G	ADAMTS2	PFKP	EXT2	RBFOX2	KLF5	GFOD1	PDE11A	IL6R	ELMO1
CHD1	CD300LG	ABR	DLGAP1	EFNA5	BTF3L4	GBE1	CIART	TLL1	ACP5	SH3RF2	PFKP	KLHL21	TBC1D1	SDC3	SOCS1	PPP3CA
C1GALT1	FUT10	IER3	DTNB	IGF1R	TXNDC12	ZNF385B	GPR135	RAP1GAP2	NOTCH1	TUFT1	EGLN3	TRIM44	MVB12B	PTBP3	CTPS1	TNIK
GOLPH3	FAM103A1	SLC25A45	PDE4D	SMAD3	PLK3	EML1	VKORC1	SCAP	SCD	MALL	MAP3K1	ZFHX3	ZC3HAV1	AVEN	ACADL	TNFAIP8
AXIN2	ARHGAP5	GSAP	SOX5	ZMIZ1	GNG13	SCMH1	MYL4	TUBA8	FABP3	CORO2A	DAP	PTPN13	PPP1R16B	INTS7	CASP8	FLNB
KLF6	EDF1	KIF3C	KIAA1217	ZFPM1	PLCXD1	PPP1R3B	OXSM	COLEC12	TCP11	KIAA1211L	ALOX5AP	GRIN2A	VAV3	CNNM1	NOD1	MBNL2
TRIB1	B3GALNT1	LCORL	THSD4	CTIF	POLE	ZDHHC2	PSMD6	SNX8	SLC1A5	LIMD1	MGST2	CACHD1	GALNT10	KCNB1	FAT4	MKL1
BCL6	ZNF32	ITGA6	NOS1AP	PCDH1	RNF112	JAZF1	MPI	HPCAL1	WHSC1	CARD11	AMPD3	GAD1	TRIO	SLC25A28	PLCL1	MYH9
CEBPB	KMT2B	PTPRK	ABTB2	RREB1	TCF20	COLEC12	C11ORF30	RAB31	YWHAQ	ABCA5	YPEL5	PTHLH	DNM3	ABCB1	GSDMC	PACSIN2
ETV3	MAFG	USP46	NFIA	PPM1H	EDN1	ITGB2	ZNF331	RMDN2	TMSB10	INPP4A	ZBTB18	SPSB1	SLC1A2	CD40LG	ZNF703	TNRC6B
ITPK1	CLN8	DYM	TGFBR3	ZHX2	FGF1	SEC14L2	SNAPC1	DIAPH3	RNF125	AVEN	BLVRB	PDZD2	ARHGEF10L	CSAD	SPARC	ANKH
CREB3L2	SETD8	VPS54	ATXN1	MYB	PRRG4	LATS1	TRIM37	AGPS	MFSD1	VPS13C	CTSB	HIVEP2	DYSF	SLC16A5	LAMA4	PCSK6
FAH	RETSAT	UBE2Q2	BCOR	AFF3	SLC25A12	PRPSAP2	SLA	KIDINS220	ZXDC	DTL	STK3	STK39	SDK1	ST6GAL1	DNAJC6	SLC24A3
TIAM1	CYP17A1	EREG	RUNX1	CSMD1	AVPI1	RAB31	ZFAT	AKAP7	ARNTL	INTS7	LGALS3	NBL1	TSHZ2	BCL3	SLC37A1	MYO3B
EHD4	TOM1L2	SCNN1A	CHST11	SLIT3	ZNF202	RMDN2	AKR1E2	WSB1	KLF13	HIC2	ESR1	GNAL	AFF1	LBP	PIPOX	UPP2
SIPA1L3	DAND5	CRIM1	EFNA5	PRKCB	AOX1	STEAP3	S100P	ZNF462	CYLD	CHPF	FNDC3B	PAPPA	FRMD4A	SERPINA1	HOPX	SOX5
GSK3B	LENEP	PLCB1	IGF1R	ZBTB16	CSRP1	TIMP3	ARRDC3	ARNTL2	ELF1	CNNM1	GRK5	BMP2	FOXN3	ABCC1	PARP14	THSD4
LYST	CELA2A	HSPA4L	SMAD3	LDLRAD4	PIK3CB	DSTYK	SCYL1	ODC1	MAP3K1	KCNB1	PHLDA1	NTRK3	CXXC5	ST7	ADIPOR2	NOS1AP
ARHGAP21	CNPY3	SNX7	ZMIZ1	ARHGAP26	CDKN1B	TANGO6	ZSWIM4	TIPARP	RYBP	SLC25A28	SYNJ2	KCNMA1	KLF3	CERS6	CCDC37	NFIA
KLF7	SERPINA9	PTK2	DISC1	PARD3B	MFGE8	ADCK3	PVRL4	SCLY	DAP	ST6GAL1	CACNA1D	TPM1	TGM2	ETV6	ZSCAN10	TGFBR3
NFKBIZ	GCSAM	ITGA2	PRKAG2	DAPK1	PLAUR	MIER1	PFKL	PKP2	KLF11	BCL3	ATP8B4	CHST15	COL18A1	ELMO1	MYBL2	ATXN1
WDR70	RNF39	SUSD1	ZFPM1	FSTL4	SLMAP	TXLNB	CA9	TPO	ZCCHC14	RCAN1	SIPA1L2	ZNF467	TNS3	PPP3CA	ENPP3	BCOR
PKD1L2	PFN4	TMEM45B	CBX4	SLC22A23	FPR2	DUSP16	EMP3	SLCO3A1	PWWP2B	LBP	FRMD5	PAX8	SLC38A2	TNIK	C9orf152	RUNX1
FBXO11	RBP1	AIM1	DLX2	CDYL	CTSF	USP24	TRIOBP	FSHR	BLVRB	SERPINA1	LHFPL2	WT1	TXNRD1	ANKRD55	FGFBP1	CHST11
NCOA2	HTR3A	PAPD5	CTIF	PLXNA2	TJP3	ODC1	CTDSP1	CNTN3	HIVEP1	PTPRF	MPDZ	SHC3	TSKU	FGD4	CPSF4L	EFNA5
NF1	MIR23B	TRAM2	PCDH1	ZBTB20	SDCBP2	RAD54B	HTR5A	CTNNA2	PIP5K1B	ABCC1	CHN2	FGF8	MSI2	TBXAS1	SYNCRIP	SMAD3
NR6A1	GRHPR	NIN	RREB1	FANCC	DNMT3L	PMP22	PPP1R13L	NDST4	JAK2	ST7	MAPKAP1	BMI1	TRAPPC9	TNFAIP8	IQCK	ZMIZ1
NTM	GLT1D1	CCDC92	PPM1H	RERE	NHSL1	TCF12	P4HA1	NUDT12	PTPRA	CERS6	PVT1	CAV1	ARID1B	WDR1	DRAM2	DISC1
SLCO5A1	DIRAS1	EFHD2	CAMK1D	PID1	IRGM	USP39	QSOX1	ROBO2	LGALS3	ETV6	RASSF8	HOXA3	SNX29	MBNL2	PLSCR1	PRKAG2
GLI3	ENHO	GLTP	MYB	ARID3A	GSTA3	DDO	DAPK2	SUCLG2	SLC44A2	ELMO1	VPS13A	LIPG	MAMDC2	MKL1	RLIM	CBX4
NAV2	ADAM24P	DPYSL3	FZD8	NFATC2	TACR3	PKIA	SSUH2	TLR4	MACROD2	PPP3CA	ACAP2	TRAF4	UBR5	MYH9	RRN3	DLX2
CSNK1E	C12orf73	KCNJ6	SSBP2	GFOD1	MLXIPL	CD180	BCAS4	CYYR1	SYNJ2	ANKRD55	SIK3	NR4A2	HDAC4	SLC24A3	CEPT1	CTIF
CRTAC1	MYL2	BRF1	AFF3	TBC1D1	PPP1R9B	SLC4A3	C2ORF42	TP63	KRT18	FGD4	VPS8	TLE1	COBL	MYO3B	STAP2	PCDH1
KCNQ2	CYB5D1	FLOT2	CTNND2	MVB12B	NELFB	SHROOM3	SLC37A3	PKIA	PTPRN2	TBXAS1	EFCAB1	BDNF	DLC1	DLGAP1	ARHGEF19	PPM1H
MDGA1	TDRD7	LATS1	CACNA2D3	ZC3HAV1	CA3	PBX1	SLC6A19	SLITRK6	FBXW8	FLNB	QPCT	PLEKHG3	SMYD3	DTNB	MAPK4	AUTS2
TESC	GNMT	PRPSAP2	CSMD1	PPP1R16B	TNNT3	ADORA2B	TPCN2	GK2	VPS13A	MKL1	FAM43A	LEF1	MAGI1	PDE4D	BTN2A2	GPC6
PHF21B	DAGLA	RAB31	SLIT3	CD14	KLK1	HIPK3	UNKL	KCNH8	FAM126A	MYH9	AKAP6	SOX9	MB21D2	SOX5	PELO	SMARCA2
CDC42EP1	PPP1R3G	C14ORF182	RBFOX1	FLI1	KLK3	ADORA3	ANKZF1	KCNJ3	PMEPA1	DTNB	MTAP	GFRA1	PPAP2B	KIAA1217	PANK3	ZHX2
CREB3L1	DIO3OS	FAM83F	PRKCB	VAV3	RAG1	LTBP1	WBSCR22	PCDH9	RAB8B	NFIA	ZNF652	BMP4	SH3BP4	THSD4	ZNF706	CAMK1D
KSR1	SLC25A47	PRMT2	ZBTB16	PTPRJ	GPR111	PLEKHA6	TMEM75	SLITRK1	CELSR1	TGFBR3	BLK	KCNS3	MTUS1	NOS1AP	SLC31A2	FZD8
ADAMTS17	PPP3CC	SLC35F6	LDLRAD4	ST3GAL1	NNAT	C1orf21	TMEM45A	UGT8	SIN3B	BCOR	CORO2B	CCND2	UTRN	NFIA	ABHD11	SSBP2
CERK	NSMCE4A	LGALSL	PHACTR1	GALNT10	APOOL	CAPZA2	WDR54	KCNA4	AES	RUNX1	C21ORF33	GATA3	PSD3	CHST11	CAST	AFF3
RAI1	TEKT5	HNF4A	ARHGAP26	TRIO	PAPSS1	FAM50B	PPP1R3C	BRINP1	THRA	IGF1R	SORBS2	SERPINE2	QKI	EFNA5	EMP1	CTNND2
DSCAML1	ALS2CL	DHCR24	PARD3B	LIPC	AURKA	PHGDH	DAZL	UBE2E2	TRIB3	SMAD3	ACTL7B	PLLP	GRAMD3	ZMIZ1	ADAMTS6	CACNA2D3
ERICH1	STAT5A	SCARB1	PARD3	AFAP1	EMC4	SH3GL3	INSIG2	PGAP1	CAPN5	PRKAG2	OPRM1	ADORA1	MCTP2	DISC1	MPP5	CSMD1
LMO1	MAST3	CTR9	PRKCA	PALLD	PAK1IP1	ADAR	GPR37L1	NAV3	MARK4	ZFPM1	PAM	AR	RND3	PRKAG2	JKAMP	SLIT3
CPNE8	TMEM106B	PTPN14	PRKCE	ANO1	DPAGT1	ANKMY2	ALDOC	SYT1	SLCO4A1	CBX4	STIM2	PHLDB1	SGK1	ZFPM1	L3HYPDH	RBFOX1
LAMA3	SH2D4A	KLHDC1	DAPK1	SH3PXD2A	BECN1	SQLE	GPI	CDH10	TMC6	CTIF	SDPR	ADRA2B	ANK3	CBX4	ZNF202	PRKCB
MAGI3	IL2RB	RBM17	FSTL4	ARHGEF10L	DDX39A	PDS5B	DNASE1	ARSJ	CMTM3	AUTS2	RASGRP3	IRF2	TBL1XR1	DLX2	PIK3CB	ZBTB16
CHD6	DNER	DDX59	SLC22A23	DYSF	AURKAIP1	TSPAN13	WISP1	CDH18	CSK	GPC6	AHR	TIFA	TEAD1	CTIF	MFGE8	LDLRAD4
CPQ	IL12RB1	ADCK3	CDYL	TSHZ2	EIF3D	ZNF207	KRT80	FARP1	TBCD	SMARCA2	TANC2	PTGER4	SLC2A1	PCDH1	PLIN2	PHACTR1
PDE10A	SLC8B1	MIER1	PLXNA2	CPNE5	MRPS2	PSEN2	GTF2IRD2B	MOCS2	UVRAG	ZHX2	INPP4B	IL15RA	MBP	RREB1	MOB3C	ARHGAP26
MMD	C10orf62	TXLNB	FGGY	EPAS1	ZFAND2A	RNF2	UPK1B	ACKR3	TK2	CAMK1D	PLXDC2	HPSE	STARD13	PPM1H	ZFP28	PARD3B
DOCK8	SCP2	EXOC6	ZBTB20	MACF1	RANBP1	TBK1	WDR89	GPR110	ANP32A	MYB	PLEKHG6	PGR	NEDD4L	AUTS2	COL16A1	PRKCA
NRIP1	C8A	SYNJ1	TCF7L2	ABLIM1	SPTY2D1	RBBP6	ZNF572	CD180	STK24	FZD8	IRS2	ARHGAP27	RBMS3	GPC6	SELENBP1	PRKCE
RSRC1	PBLD	HDDC2	RERE	AFF1	KATNA1	KCTD13	ZNF19	SAMD12	CLASRP	AFF3	SEC24D	MGLL	TRAF3IP2	SMARCA2	ZNF7	DAPK1
UGGT1	IFNK	PCTP	PID1	FRMD4A	CLNS1A	ERI3	LOXL2	FBXW7	MFSD12	CTNND2	TMC6	RFTN1	SLC8A1	ZHX2	LMBR1	JAG1
SESN3	WDR81	DUSP16	RNF144A	FOXN3	MARS	SNTA1	C1ORF27	CDH12	TMEM150A	LDLRAD4	TNFAIP3	TNFAIP2	KIF13A	CAMK1D	NREP	CDYL
NFASC	SARDH	SPIDR	ARID3A	VPS13D	ACTL6A	LGMN	SLC31A1	ROBO1	UNC13D	PARD3	ANP32A	TRIM47	PDCD6IP	MYB	LOC101928761	PLXNA2
ZNF516	CRCP	LOC81691	NFATC2	ATP1A1	CDK17	PANK4	LPIN3	SLC16A7	SMAP2	PRKCA	FRMD8	RPH3AL	LARGE	FZD8	DNAAF3	FGGY
BTBD3	AZGP1	ETFA	GFOD1	GALNT2	AAR2	FBXL8	P2RY2	BASP1	MACROD1	FSTL4	FAM210B	CD83	PPP1R9A	SSBP2	SDCBP2	ZBTB20
CPEB4	SLC30A8	USP24	TBC1D1	RUNX3	SMARCAD1	ICAM4	ELF3	KLF4	INSR	JAG1	HPD	PFDN4	SLC44A3	AFF3	SAA1	TCF7L2
E2F3	KIAA1549	ANKRD28	MVB12B	ATL2	COX6C	FAM228B	N4BP3	CNTNAP4	TLE6	SLC22A23	GSAP	OXTR	TSPAN9	CTNND2	ARHGAP8	RERE
POLA1	RNF215	UBE2R2	ZC3HAV1	FOXN2	PRMT5	IQCE	TFF1	SV2B	MYO5C	CDYL	KIF3C	LRG1	FAM49A	CACNA2D3	CSN3	PID1
PIK3AP1	SNORD85	WSB1	CD14	CXXC5	DDX49	ZNF827	DHRS13	PPP1R17	CDC27	PLXNA2	ZBTB38	WNT10B	GLI2	MYRIP	GBP5	RNF144A
HPSE2	CECR5	AGFG2	FLI1	KLF3	RAD51C	ZC3HAV1L	RIT1	RIT2	RBKS	ZBTB20	LMO7	FOSL2	SORBS1	CSMD1	IRGM	ARID3A
MRPS27	FIGLA	INPP5F	VAV3	TGM2	NFATC2IP	IGF2BP2	PFKFB4	FOLH1	HSPA4L	TCF7L2	PTPRK	JUN	FRMD4B	SLIT3	PPM1K	NFATC2
PRUNE2	PCSK4	ARRDC4	ASAP1	COL18A1	PSMA1	EPC2	C3ORF14	KCNRG	ITGA2	FANCC	FGD2	IER5	AGAP1	RBFOX1	TMEM37	TBC1D1
ACACA	ASPG	TBCE	PTPRJ	PITPNC1	ZFP91	FGF18	CECR5	LTBP1	NIN	PID1	PAH	LFNG	MAD1L1	PRKCB	IFI35	MVB12B
CLEC16A	C20orf196	RAD54B	ST3GAL1	MTHFD1L	TERF2	ADCY5	KLRF1	FEZ2	CCDC92	RNF144A	SYNE1	ZNF436	RXRA	LDLRAD4	ARHGAP32	CD14
PEMT	PCK1	PTPN3	GALNT10	SERTAD2	USP28	MTUS2	C8ORF58	TNS4	EFHD2	ARID3A	KIAA1551	LPGAT1	RAB11FIP4	ARHGAP26	GSTA3	FLI1
BTRC	C17orf78	FOXJ2	TRIO	EED	DNAJB12	PBX3	LINC01011	ATL1	GLTP	NFATC2	MDM2	SYT2	VAV2	PARD3B	AQP9	VAV3
SEL1L	MIR410	SLC22A15	LIPC	TNPO1	PDE6D	CASZ1	PXDN	FER	RASSF5	GFOD1	SCAMP1	NAV1	LPIN1	PARD3	VWA5A	ASAP1
CHCHD3	CCDC172	SLCO3A1	DNM3	MPHOSPH6	CHD4	PDZD2		GPR39	ABLIM3	TBC1D1	CAP2	NR4A3	RARA	PRKCA	GBP2	PTPRJ
EXOC4	PLN	DTWD2	SOX6	ERGIC1	CNOT4	SHISA6		EPB41L2	CPNE4	MVB12B	FRMD6	PTX3	SRCIN1	PRKCE	SLC15A2	ST3GAL1
KSR2	TRDMT1	AKAP2	SLC1A2	MDM4	CCP110	NCALD		ALDH1B1	PRIMA1	ZC3HAV1	CCDC109B	PENK	UNC5CL	DAPK1	TACR3	GALNT10
EGF	MIR122	EHF	PALLD	PARN	BUB3	STK39		CAPN9	JAZF1	PPP1R16B	ETS1	SLC41A2	AK8	FSTL4	ITPKA	TRIO
NUBPL	USHBP1	TMC1	ANO1	TSKU	PSMB6	CASKIN1		MAOB	DCLK1	CD14	RBKS	ALCAM	JAG2	SLC22A23	RHBDF1	DNM3
PMS1	EIF4EBP3	SLC1A1	SH3PXD2A	APBB2	GOSR2	IHH		FAM120A	DUSP7	FLI1	CRIM1	KITLG	CAMTA1	CDYL	TBKBP1	SOX6
SERINC3	SRRM3	VTI1A	ARHGEF10L	MSI2	AACS	CDH13		C1ORF21	FOXK1	VAV3	SUSD1	RAB3IP	DLGAP4	PLXNA2	HSD3B7	PALLD
APLP2	AFM	ZBTB43	DYSF	SPTBN1	TMEM123	NEBL		ATMIN	PEPD	DNM3	FRK	SLITRK5	MARK3	FGGY	POLI	ANO1
CFAP20	C9orf171	MAP2	SDK1	VMP1	ASB1	FLRT2		MTX2	ANKRD9	SOX6	GBE1	SLC7A2	ANXA4	ZBTB20	DBP	ARHGEF10L
FOXO1	OSGIN1	GPR110	TSHZ2	CD9	CRIP2	GDF6		PRDM9	SEC14L2	SLC1A2	NIPAL2	TACR1	IQSEC1	TCF7L2	SLC25A27	DYSF
H2AFY	TPPP2	BASP1	EPAS1	WWOX	ZFYVE1	ZIC2		DPYS	RAB31	AFAP1	VSTM4	PDGFRA	NEK6	FANCC	IGFALS	TSHZ2
STRN	CYP2G1P	KLF4	GALNTL6	TRAPPC9	HNRNPUL1	HAND2		VEPH1	SYNRG	ARHGEF10L	AIM1	MARCKS	ECE1	RERE	CX3CL1	CPNE5
TLE4		ITGB8	RAPGEF4	CDKAL1	KAT7	NKX2-5		TP53BP2	PRMT2	DYSF	PAPD5	RIPK2	CACNA2D4	PID1	TTPA	EPAS1
CDK19		LDHAL6B	MACF1	CUX1	SLC4A1AP	RASGRF1		FAM50B	HS1BP3	SDK1	TRAM2	IL13	CMKLR1	ARID3A	SPINT1	ABLIM1
HIP1		TTC8	ABLIM1	MAMDC2	RRM1	TMEM163		MAPK10	LGALSL	CPNE5	FZD6	LARP6	KIAA0232	NFATC2	KLK3	AFF1
CNKSR3		LMCD1	AFF1	UBR5	SF3A2	ZNF503		FKTN	STEAP3	GALNTL6	TMEM117	RBM24	SKAP1	TBC1D1	NEK7	FRMD4A
POC1A		S1PR1	FRMD4A	DLC1	MGRN1	CORIN		LGALS9	CTR9	ABLIM1	NIN	CD70	MYH10	MVB12B	RPRD2	FOXN3
NLK		TPD52L1	FOXN3	SMYD3	SSR1	MKX		CIITA	PTPN14	FOXN3	ENPP6	INHBA	PPP2R5C	ZC3HAV1	DCP1A	VPS13D
PDZD8		C1orf21	VPS13D	ADAM19	POLR3B	GATA5		RRAGC	DSTYK	ATP1A1	ARHGEF28	ERBB2	SYK	PPP1R16B	STX16	GALNT2
GCNT1		PIK3C2A	ATP1A1	MAGI1	HERPUD1	BMI1		STX2	ACPP	GALNT2	KHDRBS3	ACHE	CLYBL	CD14	CCNL1	RUNX3
BCL2L1		SMARCA5	GALNT2	SH3BP4	CAPN10	CAV1		AHI1	DSG2	RUNX3	CPNE4	ACSS1	RPS6KA1	FLI1	GNB2L1	FOXN2
DOCK5		PARP11	RUNX3	UTRN	EZH1	FOXP2		RABAC1	ATP1B3	ATL2	CWH43	CPD	NRXN2	VAV3	MTF2	KLF3
ITPRIP		CAPZA2	ATL2	SGK1	KIF2C	HOXA3		POU2F2	STT3B	FOXN2	LYPD6B	STAT5B	TEX2	ST3GAL1	PTPN2	COL18A1
DENND3		EPB41L2	FOXN2	SLC44A1	MLEC	NRP2		POGK	DDX59	CXXC5	BAI3	GCH1	CUEDC1	GALNT10	CCDC59	PITPNC1
DUSP5		LAMC1	CXXC5	TBL1XR1	ZBTB7A	TNRC18		BCO1	FAR1	COL18A1	CSMD3	ALOX12	IRF2BP2	TRIO	BANP	MTHFD1L
BCR		FAM160A2	KLF3	TEAD1	TRPM1	EPHA4		UBL4B	GLRX3	PITPNC1	SORCS1	TNFSF13B	ERRFI1	ANO1	THOC1	TNS3
SLC2A9		MAPKBP1	TGM2	DAB2IP	MSH2	TBX3		RNF2	SPATA6	MTHFD1L	MYO16	PDYN	VPS37B	SH3PXD2A	PDSS1	SERTAD2
KLF10		WWP1	COL18A1	SGMS1	YBX1	PLEKHG3		SREK1	ARL4D	TNS3	FOXK1	AMACR	SFSWAP	ARHGEF10L	ZNF180	SLC38A2
BNIP3L		ACOX1	PITPNC1	DDC	ABHD2	GATA4		LRGUK	DIAPH3	SERTAD2	GRIP2	OPRD1	TBC1D2	DYSF	PINX1	EED
UBE2H		STX2	MTHFD1L	SLC2A1	PAWR	GPR124		IQCE	MYO1B	SLC38A2	COLEC12	GSTP1	RASSF3	SDK1	RBM25	TNPO1
RNASET2		MAP2K5	TNS3	MBP	CTGF	ATOH8		FMNL2	ETF1	EED	ITGB2	IGF2BP1	RAPGEF1	TSHZ2	ATG16L1	ADK
EPB41		ZDHHC7	SLC38A2	STARD13	SULF2	PCDH7		SLC35G2	ETFA	TNPO1	STK10	FOXP4	BACH1	CPNE5	DNAJC2	CHD2
RCOR1		PTPN11	EED	TANC1	SLC6A6	FIGN		KCNJ12	ANKRD28	ADK	PRPSAP2	GRAMD1A	WASF2	EPAS1	PSMC2	RCC2
YPEL4		TAF12	TNPO1	RGS3	SEC14L1	TGFB2		GPC3	PMVK	CHD2	PRKAR2B	BCAT1	RFWD2	GALNTL6	INTS4	ERGIC1
SLC25A37		POGK	ADK	TRAF3IP2	JARID2	BHLHE41		NPTX2	UBE2R2	RCC2	RAB31	SLC9A8	EPN2	RAPGEF4	GLTSCR2	MDM4
WBP1L		CLCNKB	CHD2	SLC8A1	DUSP6	FGF12		STAC2	WSB1	ERGIC1	RMDN2	SS18	FBXL17	ABLIM1	MITD1	TXNRD1
UBE2V1		FBXL8	RCC2	KIF13A	TJP2	PAX3		FZD10	FBXO21	MDM4	EDNRB	KCNN2	OSBPL3	FRMD4A	GTF3C2	PARN
DOCK4		TRADD	MPHOSPH6	PDCD6IP	SSBP3	CDKN2C		VGF	TIPARP	TXNRD1	MRPL14	BCL2A1	GLTSCR1	FOXN3	RPS3	TSKU
GCLC		CBR3	MSI2	SORBS1	WEE1	AIF1L		CDS1	GLB1	PARN	AKAP7	AGTRAP	PARK2	VPS13D	NDUFV1	APBB2
MYADM		TSPAN5	SPTBN1	FRMD4B	PICALM	NEXN		PTPN13	RAD54B	TSKU	EHBP1	IGFBP2	TRAK1	ATP1A1	ZNF598	MSI2
STK4		NRARP	CTNNA1	PLEKHA5	CCRN4L	HOXA13		KIF21A	FOXJ2	APBB2	KTN1	SPP1	WWTR1	GALNT2	VPS72	SPTBN1
KDM4B		ZC3HAV1L	DPYSL2	AHNAK	LDB1	IGFBP5		ALK	PKP2	MSI2	ADCK3	CD38	EEA1	RUNX3	SPTY2D1	VMP1
RFX2		RRAGD	ANKRD11	EPB41L1	RAB7A	SGK3		FAM135B	PMP22	SPTBN1	MIER1	THBS2	BTG1	ATL2	METTL1	CTNNA1
LCMT1		EPC2	TRAPPC9	PDE8A	RALY	COL12A1		ASIC2	SLC22A5	VMP1	TXLNB	MLLT6	C1GALT1	CXXC5	TRNT1	DPYSL2
SORCS2		FAM86A	CDKAL1	SGK223	HNRNPLL	PKNOX2		ASTN2	COL6A1	DPYSL2	EXOC6	CAPNS1	AXIN2	KLF3	STAT2	WWOX
BDH1		PMAIP1	CUX1	BHLHE40	PIK3IP1	PRRX1		GRIN2A	ROBO2	WWOX	PCTP	TBL1X	KLF6	TGM2	TULP3	ANKRD11
TAPT1		CDH3	ARID1B	AGAP1	BTBD9	NDNF		TMEM132D	KCNH8	TRAPPC9	ARRDC4	PATL1	BCL6	PITPNC1	TIMM44	TRAPPC9
SLC25A26		COMMD3	UBR5	GNG7	LRRC1	KAZALD1		BRINP3	KCNJ3	CDKAL1	TBCE	ARL6IP5	CEBPB	MTHFD1L	PNPO	CDKAL1
TP53INP2		KLHL21	COBL	MAD1L1	S1PR2	ADAMTS8		RPRM	KCNA4	CUX1	CHORDC1	CDX1	EHD4	TNS3	PRRC2C	CUX1
TEX14		ZFHX3	DLC1	RXRA	ZFP64	B4GALNT1		SPOCK3	PDE6A	HDAC4	EFR3A	PLK3	SIPA1L3	SLC38A2	ZNF292	ARID1B
DIP2B		CDS1	SMYD3	RAB11FIP4	CLTC	WNT11		TMTC1	SLC1A1	SLC20A2	HACE1	ZFHX2	GSK3B	EED	BOD1L1	MAMDC2
DNAH8		PTPN13	ADAM19	VAV2	SREBF2	SLC9A5		ZFHX4	SYT1	SLC25A13	FSHR	CIDEA	IGSF3	TNPO1	CDK5RAP1	UBR5
RBFOX2		LGR5	UTRN	ELOVL5	USP12	FGFR3		PPP2R2B	PPP1CC	COBL	CNTNAP5	TRIM31	MREG	ADK	TEFM	HDAC4
TM9SF3		PITX2	GRAMD3	SLC45A4	LZTS2	PXDC1		FGF18	FARP1	GLDC	PCDH9	PRDM1	SLC1A3	CHD2	REXO4	SLC20A2
WHSC1		ARHGAP10	SGK1	LMNA	MAPK1	ZBTB46		LAMA1	EVA1A	DLC1	KCNA4	STRA6	KLF7	RCC2	FAM96A	COBL
YWHAQ		EPHB1	ANK3	LPIN1	NCDN	SAMD5		KCNIP1	MAP2	SMYD3	GRIA2	MCUR1	NFKBIZ	MPHOSPH6	ZNF565	SMYD3
MRM1		STK39	LPP	HSPG2	SLC45A1	SVEP1		GABRB3	ACKR3	MAGI1	AKAP2	ZNF706	CELF2	ERGIC1	CCBL1	ADAM19
ZNF91		SOX1	SLC44A1	RARA	HSP90AB1	FHDC1		NTNG1	SH2D4B	MB21D2	PHYHIPL	SLC30A7	RGL1	TMEM2	COX6C	MAGI1
ARNTL		PAPPA	DAB2IP	SRCIN1	YARS	KLRG2		NCAM2	SLC4A3	PPAP2B	UBE2E2	CLDN4	STAG1	MDM4	NSUN4	MB21D2
KLF13		BACH2	EXT1	UNC5CL	ANLN	BICC1		NRXN1	SHROOM3	SH3BP4	EHF	EPS8	DOCK2	TXNRD1	ELP5	PPAP2B
EGLN3		CSGALNACT1	SGMS1	AK8	CDCA4	SIAH2		PTHLH	KLF4	MTUS1	SEMA3E	EDN1	ST6GALNAC3	PARN	GGPS1	SH3BP4
DAP		CYP24A1	DDC	JAG2	DDAH1	GAS6		GLIS3	KCNC2	UTRN	PGAP1	PRRG4	PKD1L2	TSKU	PRPF31	MTUS1
PTPRA		PTPRM	SLC2A1	HYDIN	HNRNPK	FZD3		ARHGAP10	KIF5C	PSD3	SETBP1	SLC25A12	GMDS	APBB2	TFPT	PSD3
BMP2K		STXBP6	MBP	MARK3	STK40	OLFM2		KCNK9	SRGAP2	QKI	TMC1	CDC14B	SRPK2	MSI2	HEXIM1	QKI
GRHL1		BARX2	STARD13	IQSEC1	JUNB	ADAMTS1		SORCS3	SLCO4C1	GRAMD3	CDKN2B	SOX13	ADAMTSL1	SPTBN1	KLHL28	MCTP2
MACROD2		C3orf70	NEDD4L	NEK6	MATR3	TIGD5		POU3F1	HIPK3	MCTP2	ZNF365	BAIAP2L2	ANK2	VMP1	RSBN1	RND3
BCL2		T	RBMS3	ECE1	AP1M1	LPAR3		NXPH1	CABP1	RND3	DCN	TJP3	NTM	CTNNA1	FBXO33	ANK3
LIN7A		HOXC6	TANC1	CACNA2D4	ARL4A	ADM		LOX	CAPZA2	SGK1	SYT1	ABCG8	RORA	CD9	CNOT4	LPP
PCED1B		COL2A1	RGS3	CMKLR1	IVNS1ABP	FOSL2		PPP1R1B	TAPBP	ANK3	TMTC2	CRP	CA8	WWOX	TIAL1	KAT6B
PREX1		HOXA3	KIF13A	TBC1D14	LBR	IER5		CRLF1	CBX2	LPP	AKT3	TFE3	SLCO5A1	ANKRD11	GTF2H4	TEAD1
RHBDD1		LIPG	PDCD6IP	KIAA0232	ATP6V0A1	SPRY1		TMEM59L	ATN1	TBL1XR1	DPYD	GBP1	GLI3	TRAPPC9	AFTPH	DAB2IP
MED13L		EPHA4	LARGE	SKAP1	DNAJB6	EFNB2		RXFP3	TULP4	TEAD1	LPHN2	PPP1R14B	STAM	CDKAL1	FAM179B	EXT1
THADA		GATA6	SLC44A3	CMIP	EHD1	FRAT1		FOXL1	PHYH	EXT1	LRRC4C	APOE	ADCY2	CUX1	MAP3K6	DDC
BCAS3		MEIS1	TSPAN9	ERC1	LYSMD3	RGS10		GNAL	CYB5A	SGMS1	FOXP1	ARHGEF2	LAMC3	ARID1B	TUBA4A	SLC2A1
SIPA1L2		PLEKHG3	SORBS1	MYH10	MYC	GBF1		PAPPA	KIAA1324	DDC	KLF12	TMEM50A	CPNE2	SNX29	CRIP2	MBP
EML6		NTN1	AHNAK	AKAP13	RNF114	RGMB		SYT10	RAB42	SLC2A1	SHROOM3	GLI1	NAV2	MAMDC2	CMTM6	STARD13
FRMD5		FGF3	NXN	NCOA7	ROMO1	BAIAP2L1		IGFBPL1	DPYS	MBP	PBX1	TCF19	GPR133	UBR5	SNF8	NEDD4L
RASGRF2		IRS1	EPB41L1	CLDN14	CARM1	LPGAT1		CHRM3	BPTF	STARD13	KLF4	KCNK5	GRIK3	HDAC4	AARS	RBMS3
ATP8A2		CXCR4	PDE8A	ELL2	PRKRIR	NAV1		SEMA5A	CAPN1	NEDD4L	GRB14	KLK3	CSNK1E	SLC20A2	ATF4	TANC1
GNA14		MMP15	SGK223	RPS6KA1	ANKRD17	ADAMTS5		PTPRM	CDH5	TANC1	ODF1	RAG1	FNDC1	SLC25A13	POLG	RGS3
PVT1		FUT4	BHLHE40	NRXN2	STK38L	TMEM108		NTRK3	PARP16	RGS3	ITGB8	MID1	PTPRD	COBL	NBR1	TRAF3IP2
PMEPA1		HPSE	NCOR2	TEX2	NEK8	ARHGAP31		IRX6	STX2	TRAF3IP2	LMCD1	SCRN2	GRAP2	GLDC	DSCR3	SLC8A1
ACAP2		FZD4	SETD7	ARHGAP18	FTH1	CD244		GAB2	AHI1	SLC8A1	S1PR1	CCNL1	SH3KBP1	DLC1	PER1	KIF13A
SIK3		LARP1B	AGAP1	CUEDC1	RAB8A	DENND5B		CYP1B1	FAM161A	KIF13A	SLC40A1	GNB2L1	HIVEP3	SMYD3	TMEM109	PDCD6IP
CBLB		MGLL	GNG7	IRF2BP2	BZW2	EPHA3		LEPR	KIF9	PDCD6IP	TPD52L1	PTEN	CRTAC1	MAGI1	ARIH1	LARGE
STIM2		KIAA1804	MAD1L1	ERRFI1	SLC25A25	SEMA3A		RYR2	SQLE	MYO10	LACTB	PTPN2	KCNQ2	MB21D2	WAC	PTPRG
RAB8B		LBH	RXRA	VPS37B	AGER	RAB3IP		ADCY8	PJA2	LRIG1	ABHD12	RTEL1	MDGA1	PPAP2B	WIBG	SLC44A3
FBXO16		VOPP1	RAB11FIP4	TNS1	AK1	ETV4		B3GAT2	VAMP3	SORBS1	EMC2	CCDC174	INF2	SH3BP4	NUP88	TSPAN9
PTPDC1		SGCB	VAV2	TMED10	FAM118B	MRAS		POU4F3	POU2F2	PLEKHA5	TRPV3	THOC1	ZMAT4	MTUS1	LNPEP	FAM49A
ATRN		LRRC8C	ELOVL5	TBC1D2	DMTN	ADAMTS15		PRDM8	PTOV1	AHNAK	FAM120A	CCDC94	PDE2A	UTRN	RIOK2	GLI2
SH3TC1		FHDC1	SLC45A4	ARHGEF3	TRIM71	OBSL1		PPP2R2C	USF2	MEIS2	LAMC1	CCDC124	PHF21B	PSD3	COX5A	MYO10
TRIB3		ARSB	LMNA	DIP2C	TMEM17	EMID1		TBX15	NCAPH	TEAD4	RNF165	DCTPP1	CD82	QKI	BCLAF1	SORBS1
SMTN		BICC1	LPIN1	RASSF3	SNRPD2	TMEM151A		TFAP2D	PSEN2	EPB41L1	COL25A1	NDUFB7	GRM4	GRAMD3	ARF6	AHNAK
CAPG		SIAH2	HSPG2	LRRC8D	SUCLG1	PABPC4		SP8	RNF2	PDE8A	TMEM217	SYS1	CDC42EP1	MCTP2	RAB5A	NXN
CDH23		RASSF10	RARA	FANK1	DDB1	CASP7		FOXG1	TBK1	SGK223	HMOX1	GABPB1	DOPEY2	RND3	HNRNPR	EPB41L1
CMTM3		MESP1	SRCIN1	STON2	EFTUD1	MYCL		SIX3	CIT	BHLHE40	AKR1D1	MITD1	LGR6	SGK1	SMC6	PDE8A
TBCD		LFNG	AK8	FBXL17	COG1	PDGFRA		NKX2-3	GXYLT1	NCOR2	LRP12	PSMA2	LRRFIP1	LPP	PROSC	SGK223
UVRAG		CPEB2	JAG2	OSBPL3	STX6	CPE		FGF5	SC5D	SETD7	OASL	DHPS	LMO1	TBL1XR1	SND1	BHLHE40
ANP32A		LPGAT1	CAMTA1	TRAK1	MAEA	FAM98A		IRX3	ST6GALNAC2	GNG7	SOCS5	CDK17	LRBA	TEAD1	PTPN4	NCOR2
STK24		ICMT	DLGAP4	ATP10A	RAB18	GDPD1		NKX6-1	EIF5	MAD1L1	VRK2	TRIP4	ADARB2	DAB2IP	ANKRD10	SETD7
ABR		MARVELD3	PCCA	MEGF9	PSMB2	CDPF1		TMEFF2	FBXL8	RXRA	CDH5	CCDC25	TJP1	EXT1	GRHL3	AGAP1
FADD		RASD1	HYDIN	BICD1	DLG1	SCARA3		BARX1	HSF4	RAB11FIP4	PJA2	SENP2	CHD6	SGMS1	SASH1	GNG7
ELMSAN1		GPSM2	MARK3	CHD9	C6orf106	CPM		FOXC2	NOL3	VAV2	DCUN1D4	PIGF	IL7	DDC	KLF9	MAD1L1
H3F3B		DNAJA4	ANXA4	EEA1	CANX	PPP1R3D		TLX3	TMEM54	ELOVL5	POGK	RCHY1	PPA2	MBP	SOCS3	RXRA
FAM210B		AMIGO2	IQSEC1	CDC42BPA	PGS1	RCAN2		POU4F2	TRADD	LMNA	ERC2	NFATC2IP	LGI2	NEDD4L	CDKN1A	RAB11FIP4
EVI5		CAPN2	NEK6	RAPGEF5	SLC38A10	IRF8		SLIT2	DNAJB3	LPIN1	PIEZO1	ZFP91	ADAM23	RBMS3	ZFP36L1	VAV2
MAML3		TTC39C	ECE1	TANK	CEP57L1	ZNF521		DIO3	IQCE	JAG2	RAB32	PDE6D	RPS6KA2	TANC1	ID2	ELOVL5
KIF3C		PERP	CACNA2D4	DUSP10	RAC1	ABHD6		NPR3	CHST3	CAMTA1	NOL3	ZCCHC8	ST8SIA1	RGS3	ZFP36L2	LMNA
IPPK		GATM	TBC1D14	SRSF4	PROSER2	CYS1		CNIH3	TPPP	DLGAP4	FMNL2	AGO2	NCAM1	TRAF3IP2	TJP2	LPIN1
LCORL		HDAC7	KIAA0232	BTG1	GDF15	CCRL2		SCARF2	SLC5A1	ANXA4	CBR3	GPX4	PLCG2	SLC8A1	BMF	HSPG2
TLE6		MOCOS	SKAP1	CHD1	ZDHHC24	ST3GAL6		FOXL2	TNFRSF13C	IQSEC1	INHBB	PTMA	FHOD3	PDCD6IP	OSBPL1A	RARA
ZBTB38		TEC	CMIP	C1GALT1	GABARAP	TMOD1		IRX5	DUOXA1	NEK6	IGF2BP2	UBB	ROR2	LARGE	PICALM	JAG2
PTPRK		DOK1	ERC1	EFCAB2	HYOU1	TMEM229B		DLK2	ABCG4	CMKLR1	TMC7	PER1	PRTG	PTPRG	TMOD3	CAMTA1
RNGTT		LARP6	MYH10	MAN2A1	NCAPH2	B4GALT4		HOXD3	CBR3	TBC1D14	RGMA	AP2B1	NFASC	PPP1R9A	ANKLE2	DLGAP4
CDC27		SCARA3	RRBP1	KLF6	AKAP8	DOCK3		LRRTM1	APOA1	CMIP	KLF5	PPP6R3	SYT13	SLC44A3	TBC1D13	PCCA
AFAP1L2		PNMA2	AKAP13	TRIB1	NDC80	FGFR4		CALN1	CYP27B1	ERC1	KLHL21	SENP3	ABHD4	MYO10	TNFRSF19	HYDIN
NFIL3		SLC6A2	NCOA7	CEBPB	RPL19	ACADL		ST8SIA2	DUOX2	MYH10	CLSTN1	DHX9	ZNF516	AHNAK	CCM2	MARK3
EREG		FAM217B	CLDN14	ADAP1	PRG1	NOD1		SHH	GCGR	RRBP1	FAM135B	UXS1	BTBD3	NXN	CLIC4	IQSEC1
KCNIP4		PPP1R3D	ELL2	ETV3	BOD1	PEX2		BMP3	ZC3HAV1L	AKAP13	ASTN2	SKP2	NR3C1	MEIS2	PTK2B	NEK6
NIPAL2		PLK2	PPP2R5C	ITPK1	KAT8	FNBP1		TFAP2B	PPP1R26	NCOA7	CACHD1	G3BP1	SFXN1	TEAD4	RALY	ECE1
CCDC92		NAB1	SYK	ZNF710	FAF2	HSF2		KCNC4	CAMK2N1	ELL2	CACNA1E	AP2A1	LRRC16A	PDE8A	PPARD	CMIP
GLTP		ME1	CLYBL	CREB3L2	GID4	DACT1		HTR1B	FOXD3	PPP2R5C	FOXA2	SOD2	MYO1D	SGK223	PLEKHF2	MYH10
MOGAT1		ST3GAL6	RPS6KA1	LY86	AP5S1	RHOU		MSX2	GSC	SYK	SLC16A9	TOM1	CPLX2	BHLHE40	RAP1B	RRBP1
CPNE4		ACSS1	NRXN2	IGSF3	EIF4ENIF1	PIRT		NR4A2	HAS3	CLYBL	LRRN2	PTTG1IP	MMP24	NCOR2	RTN4	AKAP13
CNTNAP2		USP25	TEX2	FAM102A	SPNS1	SLC46A3		GATA6	LEFTY2	RPS6KA1	PRKG1	GPBP1	PIK3AP1	AGAP1	RALBP1	PPP2R5C
TMEM98		DUSP8	ARHGAP18	MREG	UCP2	SNX16		MEIS1	ATOH1	NRXN2	TMEM132D	ABHD2	TAF1B	GNG7	ATG10	RPS6KA1
BAI3		SLC8A3	VPS13B	HK1	TKT	ARID5B		NTRK2	DPYSL4	ARHGAP18	LHX1	SLC7A5	CTNNBL1	MAD1L1	CLTC	TEX2
SORCS1		MEDAG	CUEDC1	ARHGAP15	PIAS3	FOXP4		PODXL	DLGAP3	LRCH1	SCUBE3	FN1	MRPS27	ELOVL5	STAT3	LRCH1
ADAMTS2		PTPRE	IRF2BP2	MGAT5	CTBP1	GRAMD1A		PRSS12	OLFML2A	CUEDC1	RPRM	PAWR	PRUNE2	SLC45A4	RPTOR	CUEDC1
RAP1GAP2		PRICKLE2	ERRFI1	SERINC5	CCNT1	FAM110B		SATB1	FZD10	IRF2BP2	GRM1	ENO1	SERP2	LMNA	CYB5B	IRF2BP2
MYO16		PTPRR	VPS37B	DOCK2	NDUFS3	SLC9A8		GATA3	INHBB	ERRFI1	YAF2	AMOTL2	BTRC	SRCIN1	EIF5A	TNS1
JAZF1		SLC38A11	PHLPP1	CDH1	AHCTF1	GOT1		CDKN2C	VGF	VPS37B	NRXN1	TPD52	SEL1L	CAMTA1	PIK3R1	SFSWAP
PARVA		ASB3	TNS1	MYO1E	B4GALT5	ACP6		GABRA5	CRMP1	PHLPP1	PREX2	NFKBIA	CHCHD3	DLGAP4	CHKA	TBC1D2
DCLK1		PEX2	SFSWAP	ADAMTSL1	SMIM15	SPATS1		GAS1	TMC7	SFSWAP	GLIS3	SRC	NRXN3	PCCA	ELOVL6	ARHGEF3
GALNT7		ZNF703	TMED10	MAP2K6	MTVR2	REST		CACNG4	FAM86A	TMED10	SPSB1	ITGB1	EXOC4	HYDIN	ORAI1	FANK1
WSCD2		37226	TBC1D2	NTM	U2SURP	AEBP2		CELF4	PMAIP1	TBC1D2	SORCS3	SLC6A6	MAGI2	MARK3	PNRC1	WWC1
DUSP7		SLC25A20	ARHGEF3	RORA	OTUD6B	HPS3		PLXNA4	CCDC141	ARHGEF3	CDH2	FSCN1	SERINC3	ANXA4	HNRNPH1	RAPGEF1
ZNF787		OPRD1	LRRC8D	CD44	DIMT1	MYBL2		HS6ST2	LEMD1	RASSF3	DIRAS2	KDM6B	CFAP20	IQSEC1	YARS	SUGCT
BEGAIN		G2E3	SVIL	CA8	POLH	TEX264		GALNT14	RGMA	LRRC8D	GRB10	RARG	FOXO1	NEK6	STK40	BACH1
GRAMD4		NEURL1	CTNND1	BCAR3	ANAPC1	LRRC2		WBSCR17	CDH3	SVIL	WNT7B	BCL2L11	H2AFY	ECE1	POLG2	RFWD2
PSD2		FOXP4	FANK1	ZNRF1	ANGEL2	RRN3		PRKG2	ZIC5	BACH1	POU3F1	DUSP6	NLK	CMKLR1	ATP6V1B2	HERPUD2
RAB11FIP3		TPK1	STON2	ITGB5	METTL16	DNMT3B		COL12A1	KLF5	WASF2	KCNH3	MAP2K3	PIP4K2A	KIAA0232	DNAJC16	BAZ2B
ANKRD9		SMAD2	RAPGEF1	STAM	EIF3E	SMARCD1		NT5E	KLHL21	RFWD2	SLC6A5	TPM4	SLC2A9	SKAP1	PIP5K1A	EPN2
SCUBE1		AGK	SUGCT	CFLAR	SOD1	BCAT2		COL4A1	TRIM44	PARK2	GALR1	CDKN1A	DOCK4	CMIP	FAM168A	MOB3B
BRF1		POLE4	BACH1	MAN1C1	TARDBP	CST3		COL4A2	CLSTN1	ATP10A	SIM2	HES1	GCLC	ERC1	IVNS1ABP	OSBPL3
ZSWIM6		DENND1A	RFWD2	CPNE2	ZDHHC17	YWHAG		TBX1	ASIC2	MEGF9	CILP2	ZFP36L1	PHACTR3	MYH10	ATXN7L1	GLTSCR1
HS1BP3		SLC9A8	HERPUD2	NAV2	NDEL1	ETV5		RET	DAB1	BICD1	EYA4	PIM1	ARHGEF12	AKAP13	LIMS1	TRAK1
SAMD14		GOT1	MBOAT2	ITGA9	PPP1R8	LAP3		COMP	GRIN2A	CHD9	NRG3	SLC29A1	TRERF1	ELL2	SYPL1	MEGF9
GPHN		CLOCK	BAZ2B	GRAP2	CNOT2	PDLIM1		PTGER4	BMP7	EEA1	PAPPA	BCAR1	GRIK4	CLYBL	FZD7	BICD1
TIMP3		SS18	PARK2	TESC	UCHL3	DCTN2		FGF19	IGSF21	DUSP10	SYT10	CALD1	VEGFA	RPS6KA1	STX18	CHD9
DSTYK		ADIPOR2	TRAK1	ANO10	TXNL1	DBF4		NEUROD2	SEZ6	FAM53B	SLC30A10	DSTN	RASGEF1B	ARHGAP18	IRF1	EEA1
STT3B		CCDC37	BICD1	INF2	EIF2AK3	EFNB3		ST8SIA3	SLC16A9	OXR1	BACH2	TSPAN15	SORCS2	LRCH1	STAT1	FAM53B
DDX59		CYB5R1	RAPGEF5	ZMAT4	TAF1D	RCOR2		PXDC1	LRRN2	PRIM2	CDH8	RHOF	DOCK1	VPS13B	EHD1	PRIM2
FAR1		HPS3	TANK	PDE2A	AKIRIN1	ARL6IP5		ID4	SATB2	SRSF4	HTR7	TRIM25	MSRA	IRF2BP2	ST3GAL4	BTG1
ARL4D		AGTRAP	DUSP10	PHF21B	NIPBL	RCN1		RAB20	PRKG1	EFCAB2	CHRM3	TRIM8	PDIA5	ERRFI1	PDIK1L	CHD1
MRPL14		TMEM8A	FAM53B	CD82	VDR	TXNDC12		ZAR1	GAD1	AXIN2	PTPRM	SMG1	ACSL6	VPS37B	NARS2	C1GALT1
CCDC34		ANKRD6	OXR1	GRM4	CCT5	PALMD		LYPD1	LHX1	TRIB1	OPCML	ANKLE2	BDH1	PHLPP1	SHQ1	KLF6
DIAPH3		CBX7	PRIM2	CDC42EP1	GSG2	PCGF6		LBH	SCUBE3	ADAP1	PELI2	NDUFV2	TAPT1	TNS1	GORASP2	CEBPB
HNRNPM		LRRC2	BTG1	CREB3L1	BCDIN3D	PELO		RFTN1	PITX2	PIK3CD	SAMD4A	CCRN4L	KLHDC7A	SFSWAP	PLXNB1	ETV3
MYO1B		FAM13C	CHD1	KSR1	LSM4	TCEA1		NTNG2	SOX17	ITPK1	CYP1B1	UPP1	SLC25A26	TMED10	UGDH	CREB3L2
SLC39A11		IQCK	C1GALT1	GAB1	TMEM39B	GTF2H2		ARSI	RPRM	ZNF710	GRID1	NFE2L2	TP53INP2	TBC1D2	AP1G1	PLEKHG1
SLC41A1		RRN3	GOLPH3	DSCAML1	DRG2	NANP		TRIM9	NKAIN3	CREB3L2	TPM1	RAB30	DNAH8	ARHGEF3	IRF9	FAH
ATE1		YWHAG	PIK3CD	ERICH1	SLC25A23	RPIA		NPY	PVRL1	FAH	ADCY8	TSPAN14	RBFOX2	DIP2C	SLC1A4	TIAM1
KTN1		GLUD1	ETV3	GPR98	BAG4	DHRS3		STK32A	WNT4	EHD4	CHST15	CLIC4	TM9SF3	RASSF3	EIF4EBP1	EHD4
ETF1		PATL1	ITPK1	LRBA	KCTD7	EDN1		BACE2	FGF18	SIPA1L3	FOXD1	RALY	SCD	CTNND1	GPX1	SIPA1L3
MTTP		LYPLA1	ZNF710	MAGI3	RRAGA	LIMA1		COCH	ZFYVE28	CAPZB	IRX2	FCHSD2	TRIM62	FANK1	TSC22D4	CAPZB
G3BP2		LYRM1	CREB3L2	SLC7A8	CD63	DST		ATP1A3	LAMA1	GSK3B	WNT5A	PARD6B	YWHAQ	WWC1	DHX35	FAM102A
GLYCTK		CEPT1	PLEKHG1	CPQ	CIZ1	PDK4		ADAMTS1	OLFM1	IGSF3	SIM1	SDC4	C1orf54	RAPGEF1	ARL5B	MREG
ADCK3		CERKL	FAH	PHACTR2	BLOC1S1	ADAMTS6		CECR6	CACNA1A	MREG	ZFPM2	SPAG9	TMEM106A	SUGCT	CSTF3	HK1
SYNJ1		USP5	TIAM1	ADD3	NELFE	AMFR		GP1BB	DMRT1	HK1	TMEFF2	VEZF1	MRM1	BACH1	BRPF1	ARHGAP15
PMVK		RPAP1	SIPA1L3	CTTNBP2	STT3A	TBC1D24		INSL3	CASZ1	BMPR2	FOXQ1	ECT2	ZNF91	WASF2	C5orf51	LYST
WSB1		ADAM17	CAPZB	MAN1A1	PTBP1	ITGB3BP		ADM	SPSB1	GAS7	ONECUT3	NFAT5	CD2	HERPUD2	PBK	ARHGAP21
RNF122		FYTTD1	LY86	UBASH3B	FDPS	MPP5		IER5	WNT7B	KLF7	LHX2	HSP90AA1	UBXN10	MBOAT2	RNF141	SLC1A3
TMEM86A		FKBP4	IGSF3	GYPC	PCYT2	YAP1		LFNG	KCNH3	ZNF608	FAM211B	PRCP	MKNK1	BAZ2B	GPR180	BMPR2
AGFG2		GEMIN7	FAM102A	PDE10A	TMEM143	JKAMP		EFNB2	PRDM14	ZEB2	AVPR1A	TEF	RNF125	EPN2	FPGS	GAS7
ARRDC4		CHAC1	HK1	LRP8	AJUBA	MSANTD3		BAIAP2L1	LBX2	NFKBIZ	ST8SIA2	PTPN1	SBK1	FBXL17	PAN2	MGAT5
RAD54B		C9orf89	LYST	PRKCQ	FERMT2	AOX1		RHOQ	LOX	CELF2	CDH11	BRE	MFSD1	OSBPL3	TMBIM6	KLF7
MYOF		CIDEA	SLC1A3	FURIN	FEM1B	PLEKHA2		ADAMTS5	SPHK1	RGL1	BMP6	EIF4A2	PLXNA1	GLTSCR1	TPP2	ZNF608
PTPN3		RHPN2	GAS7	GNAQ	AHCY	KATNAL1		MAB21L2	CEBPA	COMMD10	SKOR1	SLC16A1	ZXDC	PARK2	CLK1	ZEB2
FOXJ2		ABCD4	MGAT5	SH3BP5	SLC30A9	SNX10		LRRC4	STK39	SERINC5	GDNF	STK40	ARNTL	TRAK1	CNOT6	NFKBIZ
SLC22A5		FAM188A	KLF7	MMD	FITM1	CDKN1B		PTX3	AQP5	STAG1	SEMA6A	REV3L	KLF13	WWTR1	NUP153	CELF2
EFR3A		EXTL2	ZNF608	PPA2	HIST1H2BC	PLIN3		NTF3	SCN4B	MKL2	MEIS1	JUNB	EGLN3	ATP10A	FAF1	RGL1
PAPSS2		SLC30A7	ZEB2	AGPAT3	ZNF790	SLC39A14		LEPREL1	NBL1	WDR70	BMP4	PARK7	KCNA3	MEGF9	KPNA1	SERINC5
CNTNAP5		TCEA1	NFKBIZ	LGI2	ADCK5	RHD		SEPT5	CRLF1	ZNF507	CLDN3	ENO3	UBE2E1	BICD1	PAPOLA	ST6GALNAC3
KCNH8		NANP	CELF2	CACNA1C	WDR35	PLEKHA3		ADAMTS18	TMEM59L	DOCK2	DUSP4	PFN1	CYLD	CHD9	TCEANC2	GMDS
APOB		NSUN3	RGL1	FAR2	GATB	RUFY3		PDZRN3	LTK	ST6GALNAC3	GADD45G	PPP1R15A	RYBP	EEA1	TMEM59	CCND1
EHF		CLDN4	WDR70	GRIN3A	ENTPD6	PPM1K		MAF	PANX2	PKD1L2	BMPER	SLC3A2	DAP	CDC42BPA	N4BP2	MYO1E
SYT1		ARHGEF18	DOCK2	SV2C	SPTSSA	HSD3B1		CADM1	SIM2	FBXO11	UNC5B	TMBIM1	FBRSL1	RAPGEF5	SLC38A10	NF1
TMTC2		SESTD1	ST6GALNAC3	DOCK8	EVA1B	DYNC1LI1		CDH6	NR5A1	SRPK2	KIF26B	HDGF	DAG1	TANK	MSTO1	TACC2
CDH10		SLC35F2	PKD1L2	ADAM23	OXCT1	PXMP2		SLITRK5	HOXB5	CCND1	MN1	TPRA1	WASF3	DUSP10	ZNF48	NR6A1
PACRG		ANKRD1	FBXO11	RPS6KA2	LDLRAP1	DUS1L		CAPN2	HOXB9	CDH1	SFRP2	GCLM	KLF11	FAM53B	EXOSC6	HS2ST1
ZBTB43		TM4SF1	GMDS	ST8SIA1	PLOD1	KLF15		ADCYAP1R1	HOXC8	TACC2	PCDH7	ARID1A	ZCCHC14	OXR1	UBE2G2	ADAMTSL1
CD180		CUL2	CCND1	NCAM1	SLC12A4	KRBA1		HEYL	EFNA3	FAM129A	NR2F2	ITSN2	PWWP2B	PRIM2	C20orf24	MAP2K6
FBXW7		SLC25A12	NCOA2	UGGT1	SYNGR3	TNNI1		MAL	SOX1	NR6A1	IRS1	ARL4A	STK17B	SRSF4	DDX39B	NTM
LPHN2		RAP2B	CDH1	EPHB4	SLC9A3R2	FBXO6		GREB1L	VSTM2B	HIF1A	TGFB2	LBR	SIPA1L1	BTG1	PPP1R15B	ANTXR1
FHIT		DENND1B	HIF1A	TCF3	WBSCR16	MLXIPL		PABPC4	CDKN1C	HS2ST1	HAS2	DNAJB6	AMPD3	C1GALT1	AKAP10	RORA
TENM2		CSRP1	HS2ST1	NFIB	HINT1	ETFB		SHISA2	FOXO6	ADAMTSL1	GAS1	FOS	MYT1L	GOLPH3	ALDH3A2	CD44
KLF4		NREP	MAP2K6	PTPN12	SPINT2	COX19		ATP8B1	HRK	MAP2K6	ADCY1	DUSP1	SLCO2B1	MAN2A1	ESF1	GLI3
NOVA1		PLEKHA3	NTM	PCNXL2	METAP1D	PAFAH1B3		EMP2	GNAL	ANTXR1	LRRK1	GNAI2	NUP210	AXIN2	NDUFAF5	IGFBP7
KIF5C		CD47	CA8	PLCG2	SPATA20	INPPL1		PLD5	BMP2	RORA	AK5	IRF1	YPEL5	KLF6	CLPTM1L	ITGB5
SRGAP2		CCDC127	BCAR3	ROR2	RPS19BP1	SLC25A27		PRKD1	OLIG1	CD44	MEGF11	STAT1	ZBTB18	TRIB1	HOOK2	STAM
KCNRG		SDHA	ZNRF1	PRTG	MTERF4	STARD6		CPE	CDH8	SLCO5A1	FJX1	MLLT11	PIP5K1B	BCL6	ACAT1	CFLAR
MPPED2		AASDH	ITGB5	IGFBP3	SPATS2	GCFC2		FAM98A	FAM84A	CDK6	LRP2	CCDC57	LGALS3	ADAP1	HNRNPC	ADCY2
LTBP1		PPM1K	STAM	NUAK1	SMC3	NEK7		MMP16	DMRTA2	CFLAR	COL4A1	SP3	ACOXL	CREB3L2	PCF11	LAMC3
PLEKHA6		ENPP2	CDK6	HMCN1	ALOXE3	CRYAB		RIPK2	FLRT2	PIK3C2B	PRRX1	MYC	ESR1	PLEKHG1	FLVCR1	ANKRD44
PIK3C2A		TMEM140	CFLAR	NFASC	MRPS34	CYP26B1		MOCOS	UNC5D	CPNE2	NPNT	VIM	RALGAPA2	FAH	LAMTOR2	MAN1C1
SMARCA5		TMEM37	PIK3C2B	RASGRP1	KIF17	RUNX1T1		PLCL2	JPH1	PTPRD	NMNAT2	KMT2E	MACROD2	TIAM1	GABARAP	CPNE2
FER		ARHGAP32	ADCY2	DPP4	ARPC5	KISS1R		TEC	SPON1	INF2	B4GALNT1	RNF19A	XYLT1	SIPA1L3	USPL1	NAV2
BAHCC1		NKAIN1	LAMC3	SPRY4	SHISA5	PTP4A3		AFF2	CYP1B1	PDE2A	PXDC1	FBXW11	NEDD9	CAPZB	IFT80	GPR133
BBC3		DYNC1LI1	ANKRD44	FSTL1	ORAOV1	INHA		RIMS1	KCNMA1	CD82	ZBTB46	HNRNPF	BCL2	LY86	SMC4	GRIK3
EXOSC9		PPP2R3A	MAN1C1	LAMB1	NR4A1	SCRN2		CLIP4	IGF2	CDC42EP1	SAMD5	UMPS	TPCN1	GSK3B	NAGK	CSNK1E
OTOF		WDR74	NAV2	MDFIC	PRKACA	PPP1R11		FGF13	ALX3	CREB3L1	MGLL	CDK12	NRCAM	IGSF3	RGS14	ITGA9
TSPYL4		ZNF628	CSNK1E	KRT8	UQCRB	ACO2		GPR101	RTN4RL2	KSR1	NFATC1	HMGXB4	PTPRN2	FAM102A	AASDHPPT	FNDC1
IARS		ARMC10	ITGA9	PLCB4	TP53RK	KRR1		DLEU7	CRHR1	ADAMTS17	LBH	PDE7A	LIN7A	MREG	KBTBD3	PTPRD
ABHD12		INPPL1	FNDC1	SNX30	SLIRP	FASTKD2		PCDH17	NPTX1	SDC1	TNFAIP2	BIRC2	SNTG1	ARHGAP15	HSCB	GRAP2
EPB41L2		HPS1	PTPRD	DAAM1	MNAT1	BAG6		GABRG3	SLC32A1	CERK	KL	NEK8	CBFA2T3	LYST	ZNF317	SH3KBP1
EMC2		MMP17	GRAP2	WDR75	PPT1	MED23		INHBA	DRGX	LGR6	SIAH2	TLCD1	RHBDD1	SLC1A3	HSPA13	HIVEP3
KLHL15		SPINT1	SH3KBP1	MICAL2	KIAA0196	RTEL1		PLK2	POU4F3	GNG12	TRIM9	RNASE4	MED13L	GAS7	TCEB1	ANO10
FAM160A2		KLK3	HIVEP3	CPEB4	RANBP10	USP30		RASSF2	PRDM8	RAI1	PRKCDBP	FTH1	CACNA1D	MGAT5	C2CD3	INF2
TULP4		GCFC2	KCNQ2	E2F3	PEBP1	BANP		ATP6V1C2	TBX15	LRRFIP1	KLHDC8A	PSEN1	PITPNM2	KLF7	PPME1	ZMAT4
FAHD2A		PLEK2	MDGA1	POLA1	CLDN7	CLASP1		CCDC3	ALX4	CPNE8	EFNB2	KIAA0430	EML6	NFKBIZ	ZNF112	PDE2A
PGRMC2		CSTF1	TESC	NR3C1	ITGAV	MRPL1		ESYT3	LHX6	LRBA	RGS10	NDE1	RABGAP1L	CELF2	YARS2	PHF21B
TMEM217		FASTKD2	ANO10	ADAMTS14	KIAA1456	PDSS1		SLC10A4	DMBX1	MAGI3	RGMB	SRGAP1	EGFR	RGL1	ARHGAP11A	DOPEY2
MAPK8IP1		UTP3	INF2	PRR5	KRT9	TBP		ASB3	LHX8	ADD3	CHSY1	AGER	CEMIP	COMMD10	CBL	SDC1
SNAP25		PRPF4	ZMAT4	LHPP	PLEKHA7	VPS52		MALT1	PKP1	MAN1A1	KIAA1522	TP53	KCNK2	SERINC5	CCNB2	LGR6
VSTM2L		STK11IP	CD82	GTDC1	KRT19	CIPC		PEX2	HOXA2	GPC5	NAV1	WRAP53	LRIG3	STAG1	ATAD2	GAB1
PRDM9		ATG5	GRM4	MYO1D	KRT7	NSL1		TNFSF13B	EMX1	PDE10A	SEMA6D	STAT6	GRIK2	MKL2	PHIP	GNG12
FBXO47		EMC4	CDC42EP1	CPLX2	PDCD4	CNNM2		GSDMC	LHX9	LRP8	MRC2	ASS1	EYA2	WDR70	CALM3	UST
SH3GL3		PIGM	CREB3L1	MMP24	PCMTD1	CSTF2T		DNAJC6	KCNK13	PRKCQ	PTX3	STX11	MAPKAP1	ZNF507	KNTC1	ARNT2
LGALS9		HARS2	KSR1	PIK3AP1	RANBP9	TXNL4B		TMEM154	BARHL2	FURIN	TIAM2	CS	NCKAP5	DOCK2	RSRC2	PRKCH
ADAR		TMCO1	ADAMTS17	BCAS1	PCNXL4	CCDC94		JAKMIP1	IRX1	SH3BP5	E2F6	HELLS	ATP9A	ST6GALNAC3	GOLGA7	LRRFIP1
AHI1		SNRNP200	DOPEY2	FRY	PIF1	PEF1		G2E3	SP8	MMD	HS3ST5	TMBIM4	DHCR7	PKD1L2	ALDH9A1	DSCAML1
RRS1		MGAT2	GAB1	LDLRAD3	RRM2	TMEM101		WSB2	EBF1	PPA2	RSPO2	ICAM1	MIAT	FBXO11	HIST4H4	HNF1B
UBE2Q1		DCP1A	GNG12	CTNNBL1	ASB8	DPAGT1		WWC2	LMX1B	LGI2	TMEM108	ARL5B	FBLN2	GMDS	TKT	KCTD1
ARAF		CCNC	RAI1	HPSE2	OSCP1	NUF2		RNF32	EBF3	CACNA1C	LPL	TWISTNB	KCNU1	SRPK2	TUBA1C	ERICH1
CCNK		CCNL1	UST	MRPS27	CTTNBP2NL	TNPO2		GSTP1	FOXG1	DOCK8	DAAM2	SLC39A10	SLC1A7	CCND1	WDSUB1	LMO1
SAP30		GNB2L1	DSCAML1	PRUNE2	C9orf156	PINX1		SLC10A7	NKX2-2	NR3C2	PKDCC	PARP1	IMMP2L	NCOA2	FEM1C	CHD6
RABAC1		MTF2	GPR98	ZNF697	NPPB	WDR36		TPK1	PAX7	RSRC1	CACNA2D1	PAN2	HLCS	NF1	UBP1	ADD3
PJA2		PTEN	LRBA	EFEMP1	WIPF2	PDE12		CGA	NEFM	ADAM23	LAMA2	DHRS7B	VPS13A	TACC2	MUC1	GPC5
PTPN11		PPIG	MAGI3	SERP2	C9orf91	RPS5		EFHB	NR2E1	RPS6KA2	PDZRN3	TSG101	PMEPA1	NR6A1	IPO5	IL7
VAMP3		GARS	ADARB2	RAD51B	CCDC103	TOMM6		ELAVL4	PTF1A	ST8SIA1	SLC41A2	STX4	CCSER2	ADAMTSL1	NAA30	RGS6
DCUN1D4		PAK1IP1	SLC7A8	CLEC16A	GSKIP	SUPT5H		MTCL1	FOXB1	NCAM1	EYA1	SUPT16H	SNED1	ANK2	ORC3	PDE10A
IKBKB		GTPBP3	CHD6	B4GALT1	ARL6IP1	IFT46		HNF4G	LBX1	UGGT1	RORB	SUPV3L1	EVL	MAP2K6	RARS2	GNAQ
TAGAP		RTEL1	RIN3	HIP1	STRADA	TUT1		AGK	GSX1	EPHB4	MAF	ABI1	PAK2	NTM	ORC4	CACNA1C
PTOV1		PPP1R10	CPQ	STIM1	HSP90B1	SF3B5		RALGPS2	ONECUT2	TCF3	KITLG	AZIN1	OPRM1	ANTXR1	TARS	RPS6KA2
BCO1		BANP	PHACTR2	POC1A	RNPEP	ZNF408		B4GALNT3	NEFL	NACC2	VCAN	PABPC1	SDPR	RORA	VTA1	NCAM1
CROCC		THOC1	SCRN1	NLK	RPL15	RPS14		GOT1	DLX1	NFIB	CADM1	NBN	PLXDC2	CD44	WHSC1L1	UGGT1
NCAPH		CLASP1	ADD3	PDZD8	FBL	ERCC5		MPP6	VWC2	PDGFA	CDH6	HMGN1	SIN3B	CA8	CLCC1	EPHB4
VTCN1		MRPL1	CTTNBP2	ADRB2	WRN	ZDHHC6		GJC1	EOMES	PTPN12	FGF10	VRK1	TUBG1	SLCO5A1	AIG1	NACC2
CIT		VPS52	MAN1A1	THBS1	AAMDC	NUP205		ACP6	HOXD11	PLCG2	SFMBT2	FBXO46	TTI1	GLI3	IPO11	PDGFA
DEPDC1		NSL1	UBASH3B	GLIPR2	PCGF5	SCYL3		STMN2	HOXD13	FHOD3	STC2	PPIF	USP31	IGFBP7	MTMR10	PTPN12
GXYLT1		CSTF2T	GYPC	SCGB1A1	RTN4IP1	PSMC2		ATCAY	SIX2	PRTG	AREG	PPP1R15B	CAPN5	CDK6	RWDD1	PCNXL2
SC5D		TXNL4B	RGS6	BCL2L1	SPATA5	INTS4		PP2D1	SIX3	GPD2	GJA3	MAP7	SLCO4A1	ANKRD44	ARPC1B	PLCG2
RBBP6		ZNF180	PDE10A	MANBAL	ZKSCAN3	SLC33A1		DPPA5	NKX2-1	LAMB1	MAL	ZDHHC24	TBCD	MAN1C1	MYD88	VANGL1
ADNP2		PEF1	PRKCQ	VPS53	CLCN7	MRPL44		SYNCRIP	OSR2	MDFIC	SHISA2	UBQLN4	UVRAG	CPNE2	EAF2	ROR2
FAM118A		UBE4A	FURIN	DOCK5	ITM2B	PLEKHA1		CCDC38	RAX	IGF1	ALX1	MZF1	ANP32A	NAV2	FARSB	CDC42EP3
ERI3		TMEM101	GNAQ	ETS2	DYX1C1	PIH1D2		SLC6A7	ZIC2	KRT8	COL14A1	CKS1B	NFKB1	GPR133	SOD1	DCLK2
LRGUK		SLX4IP	SH3BP5	TNIP1	PLRG1	TBL3		USP44	DMRT3	ABHD4	EMP2	SHC1	ALLC	GRIK3	SHMT1	LAMC2
MAPK13		SDF2	PPA2	CHRNA9	JMY	PEX3		TUBB2B	EN2	BTBD3	MMP7	NAB2	FAM210B	CSNK1E	TMEM168	GPC4
CLCNKB		SUPT6H	AGPAT3	ITPRIP	ACKR2	BMS1		GSTA4	EBF2	SYTL2	FAM131B	CBX5	HPD	ITGA9	ASAH1	NUAK1
TRAK2		CBLL1	LGI2	DENND3	CREBRF	KCTD5		AKTIP	POU3F2	COL5A2	KCNJ2	IER2	MACROD1	FNDC1	NAMPT	ROR1
LGMN		PLAA	CACNA1C	DUSP5	SLC25A42	RBL1		TDRD3	ZIC1	PLCB4	MARCKS	RBM14	ST18	PTPRD	REEP5	SYT13
AATK		CCDC124	FAR2	AMOTL1	FUK	GSTCD		AMT	TBX20	DAAM1	DOK1	UBE2Z	DOT1L	GRAP2	GTF2A2	KAT2B
SLC16A8		TPGS1	GRIN3A	MAML2	CENPJ	YIPF2		METTL15	FEZF2	WDR75	PARD6G	DCTN4	ZC3H8	SH3KBP1	DDX20	ABHD4
KCNAB3		NELFA	SV2C	CD109	PGM2L1	GIN1		IDUA	ZIC4	MICAL3	POU4F1	RPS28	RBM19	HIVEP3	VPRBP	ZNF516
ZFYVE21		PPIL4	DOCK8	PXN	RAB13	MITD1		CLDN5	PHOX2B	CDK5RAP2	PLA2G2D	RPL23A	GNS	CRTAC1	ABHD17B	BTBD3
ZNF25		RPF1	NRIP1	TINAGL1	CREBL2	IMMT		TCF7	FOXD4	CPEB4	CCDC69	TBC1D12	ZHX3	TESC	POLD3	SYTL2
ABHD8		WDR36	NR3C2	BCR	MYL4	KDM8		GABRP	PAX9	E2F3	RCAN2	BOD1	USP46	ZMAT4	TNKS2	COL5A2
MRPL34		SUPT5H	RPS6KA2	PIP4K2A	ZNF213	TTC26		HMP19	HOXB4	POLA1	OSMR	RPS27A	DLG2	KSR1	PSMD3	PLCB4
LEPREL4		CCAR2	ST8SIA1	KLF10	KHNYN	MRRF		CDX1	HOXC12	NR3C1	CD302	RBBP4	RNGTT	ADAMTS17	CCT5	RBMS1
EIF5		RNASEH1	EPHB4	SERPINE1	PDXP	GIPC1		ACSBG2	HOXB6	SFXN1	ASB3	YY1	FGD2	DOPEY2	FITM2	SNX30
PANK4		ECD	TCF3	ZNF366	ATOX1	WRB		DET1	HOXB7	ALOX5	PEX2	RELA	FOXN4	GNG12	LSM4	ITGA11
SPOCK2		MED11	NFIB	BNIP3L	COMMD8	TTC25		RGS9	LHX5	GTDC1	FAT4	SEC24A	PAH	RAI1	SNRNP35	MICAL2
SOCS7		RBM22	PTPN12	UBE2H	RPS12	NXF1		RPIA	NKX2-3	MYO1D	EIF4E3	TRAPPC3	TBC1D5	UST	CD3EAP	MICAL3
ZNF827		EMG1	PCNXL2	RNASET2	RAD9B	GYS1		DHX32	MNX1	MMP24	FNBP1	POLR2A	KYNU	ARNT2	RRAGA	CPEB4
ANKRD34A		TNPO3	SESN3	EPB41	MRPS25	LONP1		PIK3CB	OLIG2	PIK3AP1	SPARC	ATG13	SMARCD3	PRKCH	BSDC1	NR3C1
IFT172		GABPA	PLCG2	RCOR1	ELP3	NCL		CDKN1B	EVX1	TAF1B	PDLIM3	UCP2	SGCZ	DSCAML1	IBA57	ADAMTS14
APOA1		ATG12	VANGL1	SLC6A9	PPIL2	PRPF6		LMBR1	NEUROG2	ZBTB10	ADH7	PRKAB2	LOXL4	HNF1B	MFSD10	PRR5
BIN1		CWF19L1	FHOD3	YPEL4	CASP8AP2	RXRB		GCM1	INSM1	TBC1D16	LAMA4	ATXN2L	ETS1	CPNE8	SBNO2	ALOX5
STAC2		KDM5A	ROR2	SLC25A37	LAMB2	RANBP1		NUDT1	OTX1	BCAS1	RHOU	UBE2M	NDST1	LAMA3	RNF130	MYO1D
DLGAP3		ZDHHC6	PRTG	ITPR1	CNR2	RPLP0		DGKQ	IRX2	FRY	PREP	AHCTF1	MAL2	GPR98	IFT20	TBC1D16
SCRT1		NUP205	DCLK2	WBP1L	RASGRP4	TUBB4B		FTSJ2	ONECUT1	LDLRAD3	ABCC12	CDC42EP4	KCNC1	LRBA	TNFAIP1	FRY
VGF		NOP58	NFASC	UBE2V1	HTR2A	KXD1		IFIT1	PAX2	CTNNBL1	GJA1	B4GALT5	TLL2	MAGI3	AUP1	CTNNBL1
CRMP1		RPS27	KAT2B	KDM4B	ALPK3	VPS72		CPLX1	MSX1	MRPS27	RALGPS2	MUC1	PAPD5	ADARB2	HTRA2	HPSE2
PMAIP1		FBXO38	ABHD4	RFX2	ALAD	NARS		DSCAM	SIM1	PRUNE2	RTP4	SMPD1	TRAM2	TJP1	DDX51	MED12L
KLF5		RBM25	ZNF516	LCMT1	SRRM1	BUD31		GSTA3	DLL4	CNTLN	TUBB3	USP49	NIN	CHD6	NOC4L	RAD51B
TRIM44		SCYL3	SYTL2	ARHGEF12	IFNAR2	ZNF426		SLC26A1	PCDH8	INSC	PDGFC	MTMR2	SGPP1	RIN3	GMPPB	BTRC
ACVRL1		DPP8	RBMS1	TRERF1	SMAD5	TMEM208		C7ORF33	FOXF2	SERP2	SPIC	ASB6	CCDC92	CPQ	REXO2	EXOC4
LGR5		NOL7	SNX30	HAAO	CHEK2	FBXO8		MCF2	HOXB3	CLEC16A	FAM13C	LYRM4	SEMA7A	CTTNBP2	KHSRP	KSR2
ALK		RAD1	DAAM1	CSF1	PADI4	TMEM167A		CCT8L2	GSX2	PEMT	TMEFF1	SECISBP2	SCMH1	MAN1A1	SLC27A1	B4GALT1
RAP1GAP		RPL37	WDR75	HSD11B1	CCR1	STAT2		RAB1A	HOXB13	BTRC	CAPNS1	TBRG4	IGDCC4	UBASH3B	TRIP10	STIM1
FAM135B		DNAJC2	MICAL2	DGKD	FNDC5	NIP7		MMP14	SIX1	SEL1L	GSTA4	SRRT	PPP1R3B	GPC5	PSMC6	NLK
ASIC2		DDX28	MICAL3	EDEM1	ARHGAP30	PSMD7		KLHL2	DLX5	CHCHD3	AKTIP	NDUFA7	GPR125	IL7	STXBP3	ADRB2
ATP2B2		DUS2	CDK5RAP2	RASGEF1B	CISH	CDK17		DCSTAMP	WT1	NRXN3	YWHAG	BRCA2	OAF	GYPC	PPP2R5B	THBS1
BMP7		ZFYVE20	CPEB4	SORCS2	RAC2	NCOA3		SLC28A3	HAND2	KSR2	DPPA4	UBN2	KCNJ5	RGS6	CBWD1	MRVI1
LHX1		DUSP11	E2F3	ACSL6	UBLCP1	ATF7IP		GPR111	FOXD2	B4GALT1	LEFTY1	MAP4K1	ZDHHC2	LRP8	SPTLC2	GLIPR2
NELL2		NOC3L	NR3C1	BDH1	ENTPD4	WWP2		VPREB1	FOXF1	CDK19	PHTF2	SOD1	MGAT5B	PRKCQ	AJUBA	SCGB1A1
PVRL1		NDUFB7	SFXN1	KLHDC7A	RNF145	GCN1L1		FASTKD2	ISL2	HIP1	SULF1	ZNF438	KHDRBS3	FURIN	PCBP4	BCL2L1
ZFYVE28		ATP6V1D	ADAMTS14	ZBTB34	LRMP	JTB		MDH1B	BARX2	STIM1	TFPI	SF3B1	TNR	GNAQ	PRMT1	MANBAL
CUX2		TIMM10	PRR5	TP53INP2	BAZ2A	ZC3H10		NKIRAS1	IRX3	PDZD8	METTL15	SUB1	TGFA	SH3BP5	R3HCC1L	VPS53
FBXL7		UBL7	ANKRD35	TEX14	POLR3GL	PRRC2C		RNF6	NKX6-1	ADRB2	GABRP	CLTA	ABLIM3	AGPAT3	CNDP2	S100A10
CACNA1A		AP5Z1	LHPP	URGCP	IGFBP4	AAR2		TMCO1	TMEFF2	THBS1	TSPAN17	STARD3NL	CPNE4	LGI2	FN3K	DOCK5
DLGAP2		KAT5	ALOX5	JADE1	ENDOD1	GALK2		CCNL1	OSR1	GCNT1	PLK3	RAB11FIP5	EDN3	CACNA1C	LARP1	AMOTL1
SYNE2		MRPL16	GTDC1	SCD	STARD10	PSMF1		SSBP1	TBX18	MRVI1	ADAM17	CTSL	TNFAIP8L3	FAR2	MYRF	CD109
ADAMTS3		GLTSCR2	LRRC16A	SLC1A5	METTL10	AQR		BANP	BARX1	BCL2L1	GPT2	NAMPT	GRM3	GRIN3A	FAM167B	PXN
HS3ST1		ACTR3	MYO1D	WHSC1	PLA2G1B	MTMR9		THOC1	DLX3	DOCK5	FBF1	RELB	PPP4R4	SV2C	SKI	BCR
CASZ1		PEX3	PIK3AP1	YWHAQ	WDR45	DDX18		TMEM230	FOXC2	ETS2	FTL	ERF	FAM19A1	DOCK8	SPPL2A	SLC2A9
GLIS3		GSTCD	BCAS1	TMEM106A	PDHA1	TOP3B		RBM28	TLX3	KLF10	ZNF706	PRKAA1	SBF2	NR3C2	H6PD	ARHGEF12
THSD7B		NUDT5	FRY	MRM1	GGT1	GPATCH1		ZNF143	FEV	BNIP3L	FBLIM1	OLA1	CNTNAP2	RSRC1	PQLC1	TRERF1
PITPNM3		EIF3D	LDLRAD3	CD2	NDUFS5	PEX14		NUP155	NKX2-5	EPB41	CLDN4	ASPH	DNAH11	ADAM23	SLC25A10	GRIK4
ADAM11		GTF3C2	CTNNBL1	UBXN10	C5orf24	CDK5RAP1		CBR4	POU4F2	SLC6A9	ADAMTS6	COX4I1	GALNT13	RPS6KA2	ZNF324	HAAO
CARD10		AGBL5	HPSE2	LCOR	FBXO3	ZNF3		BMS1	SHOX2	YPEL4	ANXA1	BNIP3	TMEM98	ST8SIA1	MLXIP	VEGFA
AQP5		CKS2	MRPS27	MAS1	TLK2	REXO4		CDC123	SLIT2	SLC25A37	AVPI1	TXNL1	FRMD3	NCAM1	SLC25A35	CSF1
HOXB9		FAU	PRUNE2	RNF125	SPNS3	DMAP1		NUDT5	NKX2-8	ITPR1	MSANTD3	EIF2AK3	SHANK2	UGGT1	TRIM72	HSD11B1
HOXC8		ZNF830	ZNF697	MFSD1	C17orf59	TMEM18		ZC3H18	DBX1	UBE2V1	AOX1	RAB21	KIAA1755	EPHB4	DGKA	DGKD
ELFN2		ENDOV	SERP2	PLXNA1	HIST3H2BA	NUDT13		CHMP1B	DNAJC22	DOCK4	SOX13	TAF1D	GSG1L	TCF3	SYTL1	EDEM1
SH3RF3		MFSD5	MED12L	ZXDC	AMPH	METTL18		COPS8	HOXD10	GCLC	PIK3CB	MKLN1	PHF2	NACC2	SNX3	SORCS2
HIC1		MTF1	RAD51B	EGLN3	RGS2	MAGOH		LAMTOR5	HOXD9	PHACTR3	GIPC2	TFG	BSN	NFIB	DPH3	DOCK1
HRK		GIPC1	ACACA	UBE2E1	SDF4	MTFR2		NDUFV1	PRDM6	TTLL11	PLAUR	SMCHD1	OPTC	PDGFA	OXNAD1	MSRA
BACH2		RNMTL1	CLEC16A	CYLD	MED22	METTL3		MAP1LC3B	DIO3	MYADM	SLMAP	TMEM243	FABP6	PTPN12	TRAIP	KLHDC7A
CDH13		TRMT61A	BTRC	ELF1	KCTD9	ZKSCAN1		RANBP1	TMEM132E	STK4	ALS2CR12	CD63	KLHL3	PCNXL2	HDAC1	TEX14
PTPRT		C19orf52	SEL1L	RYBP	RECQL4	RAB11A		TRMT2A	NEUROG1	IL31RA	PLEKHA3	GRIN1	LYPD4	SESN3	VAMP4	DIP2B
SEMA5A		NGRN	NRXN3	DAP	CLN8	AHSA1		ACOX3	TBX4	MEMO1	C1orf100	FARS2	FAM105A	PLCG2	HMOX2	URGCP
NOL4		IFT52	KSR2	FBRSL1	MBD1	ANAPC5		NARS	NPR3	KDM4B	DNMT3L	CCDC97	FAM19A5	FHOD3	MBD2	JADE1
CDH22		FAM136A	FOXO1	ZCCHC14	RETSAT	NSUN4		TMEM184C	EN1	RFX2	NHSL1	SDCBP	PCBP3	IGFBP3	TSPYL1	PPARGC1A
CDH4		ZNF638	H2AFY	STK17B	ASB15	RSL1D1		OCIAD1	CHST8	LCMT1	COIL	IFT20	ADAM12	LAMC2	FASTK	RBFOX2
SDK2		DPH7	STRN	ALOX5AP	PINK1	KDM4D		PSMA2	HS3ST3B1	POU6F2	ARHGAP32	TNFAIP1	KCNJ6	VEGFC	LCP1	VGLL4
B3GAT2		RPS21	TLE4	MGST2	CASP12	BRMS1L		RBM15	SHC3	HAAO	ILDR1	TMEM102	DRD1	RASGRP1	NAGA	NOTCH1
CRHR1		TOX4	B4GALT1	SIPA1L1	MTNR1B	RNF168		TSSC1	CNIH3	VEGFA	BCL2L14	SSSCA1	ANO5	CLIC5	ATF6	TRIM62
SLC32A1		POLR2J	CDK19	AMPD3	EFS	LTN1		TOP3B	FOXL2	DGKD	GSTA3	BLOC1S1	KCNQ3	ROR1	ZC3HC1	UGCG
B4GALNT2		ZNF341	STIM1	MYT1L	IL25	RAD51C		SF3A3	FOXQ1	EDEM1	CCT8L2	RFX5	EDIL3	DPP4	NDUFS4	IFNAR1
PKP1		LONP1	CNKSR3	SLCO2B1	PSMG2	SPCS3		SLC35B4	LMX1A	RASGEF1B	COL5A1	TESK2	PRIMA1	SPRY4	DCAF4	RNF125
EBF1		PRPF6	POC1A	NUP210	EPCAM	ZFP91		MTFR2	PITX1	SORCS2	SYNC	GTF2E1	CWH43	SLC46A2	TXLNA	SBK1
FOXD1		RPL26	NLK	BLVRB	GALNT18	TERF2		RWDD2B	HMGA2	DOCK1	DGKZ	LENG9	LYPD6B	SYT13	CREB3	PLXNA1
LMX1B		TACO1	PDZD8	HIVEP1	ZNF280D	USP28		SZRD1	HOXC10	MSRA	POLI	GRN	BAI3	GPD2	TLN1	ZXDC
EBF3		RPS6	ADRB2	PIP5K1B	EFNA4	PRPF19		BUD13	ONECUT3	PDIA5	CSTB	CFL2	CSMD3	LAMB1	SERTAD3	ARNTL
CDK5R2		KANSL3	THBS1	JAK2	ZBTB39	TIAL1		CHCHD2	IRX5	SLC25A26	MID1	EMC8	SORCS1	MDFIC	TALDO1	ELF1
NEFM		RPL29	GCNT1	BMP2K	TPT1	AP2S1		STXBP2	ZNF503	URGCP	ETNPPL	PRPF39	PPFIA2	IGF1	CRACR2B	MAP3K1
NR2E1		RPS9	MRVI1	SLC16A10	FECH	GTF2H4		RPS3A	CCNO	JADE1	SCEL	AKR1B1	CDH7	KRT8	REPIN1	RYBP
PTF1A		TRIM41	GLIPR2	MBNL1	TNF	TIMM22		SWT1	LHX2	PPARGC1A	APOOL	SWAP70	FA2H	DAAM1	RPAIN	MGST2
TBX20		TUBB4B	SCGB1A1	RHOBTB3	VAMP2	RPL34		TRMT1L	EVX2	DNAH8	PAPSS1	NT5M	ADAMTS2	WDR75	FAM20A	SIPA1L1
HOXB4		NDUFS7	BCL2L1	FHL2	CAMK2A	AGO2		FANCD2	TBX2	RBFOX2	GCFC2	CCL4	TLL1	ITGA11	CLDN7	MYT1L
HOXB13		POLE3	MANBAL	CTSB	PODXL2	ANXA11		KIF20B	HOXC13	PFKP	NEK7	SQSTM1	RAP1GAP2	MICAL2	GDI2	NUP210
WT1		SPTY2D1	VPS53	STK3	CNTD1	PVR		COPE	PAX1	VGLL4	PQLC3	S100A13	MYO16	CDK5RAP2	CAPRIN2	BLVRB
HAND2		BUD31	DOCK5	FAM213A	HIST1H3F	TUBA4A		DDX49	FAM211B	ACP5	S1PR3	SIX5	ST6GALNAC5	E2F3	SFT2D2	HIVEP1
ISL2		ZNF426	TNIP1	LGALS3	HOXD8	ASB1		PCNA	NKX1-2	NOTCH1	VPREB1	RNF126	WSCD1	NR3C1	RMI2	PIP5K1B
TLX3		EEF1B2	CHRNA9	STRN3	MTO1	ITSN1		LTN1	HOXA11	SCD	SCRN2	PPP5C	WSCD2	SFXN1	SLC50A1	JAK2
TMEM132E		METTL1	DENND3	SLC44A2	APBB1	CRIP2		CDK8	T	FABP3	ACO2	PRMT1	AFAP1L1	PRR5	RHOC	PTPRA
EN1		TMEM208	DUSP5	DLG5	CLTB	CTDSP2		WNK1	ESX1	SLC1A5	ATG5	PRKCD	DUSP7	LHPP	MTFP1	BMP2K
NRN1		TMEM184C	AMOTL1	CRISPLD2	E4F1	FZD5		ZNF589	HOXA7	YWHAQ	ADAT2	APLF	FOXK1	ALOX5	S100PBP	SLC16A10
HS3ST3B1		TRMT10C	MAML2	DDR1	PPP1R3F	BOLA3		EXO1	FOXC1	TMSB10	NCBP2	IL23A	NFIC	LRRC16A	RRP15	MBNL1
HOXC10		PDCD11	CD109	TPCN1	PIK3C3	GPX4		ERGIC2	HOXA10	UGCG	SGOL2	GRB7	ZNF787	MYO1D	SNAP23	ST3GAL5
ONECUT3		C19orf43	PXN	PHLDA1	KCNS2	AGAP3		XAB2	HOXC6	TMEM106A	CLASP1	MED15	PEPD	CPLX2	KIAA0020	RHOBTB3
IRX5		OCIAD1	TINAGL1	SYNJ2	CYP46A1	AARS		UQCRFS1	HOXA5	MRM1	CSTF2T	DUSP3	SCAP	MMP24	KCNIP3	FHL2
ZNF503		EIF2S3	BCR	TTC39A	TRPC3	ATF4		CHST12	HOXC5	ZNF91	NDUFB3	SPPL2A	BEGAIN	ZBTB10	APOBR	SLC7A1
LHX2		PSMA2	PIP4K2A	CMTM8	MAPK8IP2	ABCC5		TRRAP	HOXA4	RNF125	SNRPD3	ST5	GRIP2	BCAS1	RBM27	CTSB
T		GFM2	SLC2A9	KRT18	LRRC4B	C12orf57		CTDSP2	HOXC9	ARNTL	UBE4A	EBI3	PSD2	FRY	LARP4	STK3
FOXC1		TTC14	KLF10	NRCAM	IFNL2	AHCYL2		CCDC77	HOXA9	KLF13	ECD	LZIC	RAB11FIP3	LDLRAD3	CUTA	STOM
WNT1		TMEM167A	BNIP3L	PTPRN2	OR1D2	SERBP1		CASC5	FOXE3	EGLN3	MRPL13	NMNAT1	SCUBE1	CTNNBL1	MAPK14	STRN3
ANKRD33B		NSA2	UBE2H	PCED1B	ZAP70	HNRNPA1		DSCR3	WNT1	CYLD	CCNT2	TRAPPC10	PDGFB	HPSE2	HMGXB3	CLMN
RELN		STAT2	RNASET2	WIPF1	TTYH3	ZCWPW1		HNRNPD	HOXD12	ELF1	ZNF143	WDR45B	UBTD2	MRPS27	SLC35A3	DLG5
CYP26A1		CLNS1A	EPB41	ASAP2	ERVFRD-1	CAPRIN1		HSPA4	HOXD3	MAP3K1	SCYL3	HSPA1A	SYNRG	PRUNE2	IGSF9	ERN1
GDNF		MARS	RCOR1	CBFA2T3	CAPN12	UBB		EEF2	NKX3-2	RYBP	AP5Z1	HSPA1L	ERG	CNTLN	C9orf91	FNDC3B
ASCL1		EFTUD2	SLC6A9	RHBDD1	SLC7A4	HNRNPL		HNRNPDL	SP9	DAP	KAT5	RUFY1	QSOX2	ZNF697	STRADA	RALGAPA2
ADRA1D		FDXACB1	YPEL4	MED13L	TRAPPC4	NAT10		SLC25A40	SOX30	FBRSL1	MMS19	KDM2A	ROPN1L	EFEMP1	C1orf123	MACROD2
CBX8		MIS12	SLC25A37	THADA	TM7SF2	RPL13A		MPLKIP	ANKRD33B	DAG1	GIN1	SLC11A2	ZSWIM6	INSC	C11orf24	XYLT1
TRAF4		SERINC1	ITPR1	ASCC2	GPAM	ZNF585A		RAD23B	HELT	WASF3	CRYZ	RPS2	LGALSL	SERP2	FKBP11	LRP5
SEMA6A		MTBP	WBP1L	EML6	ZNF354A	SETD5		BCLAF1	CDH11	KLF11	POLR2J	TNFSF13	ANK1	MED12L	CPSF2	NEDD9
TNRC18		COG8	UBE2V1	RABGAP1L	CHMP4B	CSNK1A1		ADAT1	GFRA2	ZCCHC14	EMC7	ITFG3	GPR132	RAD51B	CR1L	BCL2
ARL4C		NIP7	TTLL11	ATP8A2	KLC2	WAC		ARF6	SKOR1	STK17B	RPL10A	ZFX	CD86	ACACA	PCGF5	CRISPLD2
EPHA4		DDX21	KDM4B	PIEZO2	EDEM3	RBM39		RAB5A	RELN	ALOX5AP	RPS6	CSRP2	TNFSF10	CLEC16A	EEF1E1	DDR1
NR4A2		EIF3M	RFX2	SLC2A12	ZBP1	ATG7		MRPS35	WNT3	MGST2	BUD31	VIMP	EXOG	CHCHD3	EHHADH	PHLDA1
TLE1		PSMD7	LCMT1	LHFPL2	TMEM63B	SLC4A1AP		KIF18A	CYP26A1	SIPA1L1	GTF2H1	MAP3K11	RIC3	NRXN3	MAFF	TBC1D8
TBX3		LRRC40	POU6F2	COL26A1	RAB17	LRRC41		SETX	DMRT2	AMPD3	CDK17	AP4M1	CCL17	EXOC4	DDX52	SYNJ2
BDNF		GTF2H1	ARHGEF12	PDE8B	EPX	MGEA5		TCERG1	VAX1	MYT1L	GALK2	EGR1	HNF4A	KSR2	TATDN2	TTC39A
MEIS1		MFAP3	TRERF1	THRB	HIST1H1E	LNPEP		PDIA6	GDNF	NUP210	SNX1	ZMIZ2	SCARB1	EGF	MED17	KRT18
GFRA1		STX12	PDIA5	FAM84B	CD3E	HDLBP		ABLIM2	VGLL2	YPEL5	NUDT13	THAP6	STEAP3	MAGI2	SEC61G	PTPRN2
DUSP4		NCOA3	ACSL6	EYA2	GTPBP8	P4HB		EPS15	EMILIN3	ZBTB18	MRPL38	BAX	GPR97	NUBPL	PRMT6	STAU2
SOX4		MTMR9	BDH1	ATP9A	PIAS2	BIRC6		APBA2	FZD1	PIP5K1B	CASP6	CYTH4	SAMD14	SERINC3	KDELC2	EEPD1
FZD2		MAN2C1	TAPT1	FAM65C	SPESP1	EIF4E2		SND1	KCTD8	JAK2	CLN5	NFKBIE	SKA1	UPF2	AGMO	KALRN
ATF3		PSMB1	TP53INP2	CDK15	CC2D1A	SSR1		VAPA	MKX	PTPRA	RPS3A	SNAI1	GPHN	FOXO1	CREBRF	ARSG
PPM1E		TEFM	ACP5	YPEL2	GPR45	ADSS		HBS1L	SHH	SLC7A1	SWT1	CCDC115	DSTYK	H2AFY	PFKFB2	BCAS3
UNC5B		REXO4	NOTCH1	FSIP1	CSNK1G3	RQCD1		PAWR	SSTR1	SPPL3	COX6C	NFKBID	MTA1	STRN	DOK4	CACNA1D
KIF26B		FAM96A	SCD	NBPF1	PRRC1	TMEM231		ANKRD10	SEL1L3	STRN3	SPCS3	NFKB2	KLHDC1	TLE4	SLC25A42	PITPNM2
SATB1		NOSIP	TRIM62	FAM101A	ALPPL2	CUL5		MAP2K3	SOX3	GRHL1	TERF2	PLXNB2	SCRT2	B4GALT1	SRD5A3	ATP8B4
ISL1		SIRT6	SLC1A5	MIAT	RGS8	KDM5B		CDKN1A	CCR9	TSNARE1	FBXO33	NR4A1	MRPS26	CDK19	TMEM120A	FRMD5
HAS2		MAGOH	WHSC1	FAM102B	AGRP	DNAJB1		SPRED2	COL2A1	SLC44A2	COPS7A	PRKACA	RBM17	ADRB2	CYB561	CEP112
PCDH10		METTL3	YWHAQ	FBLN2	C12orf68	HERPUD1		ID2	TFAP2B	ERN1	HRSP12	ZNF574	GLRX3	THBS1	USP6NL	RABGAP1L
ELFN1		ICT1	UGCG	RARRES1	RUNDC1	CAPN10		SLC23A2	FOXE1	FNDC3B	CWC25	LYZ	SPATA6	GCNT1	TMED5	ATP8A2
GAS1		CLN5	C1orf54	PVT1	ASIC1	KIF2C		UCK2	KCNC4	RALGAPA2	HINT3	LPXN	DIAPH3	MRVI1	PYCARD	PIEZO2
CELF4		RPS23	TMEM106A	FBXW8	RGS5	RACGAP1		PTP4A1	CRABP1	MACROD2	AACS	ARFRP1	GTSF1L	BCL2L1	CPSF3L	SLC2A12
PLXNA4		LSM10	MRM1	RASSF8	GNB4	ATP2A2		WEE1	PROKR2	XYLT1	KCTD20	BNIP1	ATXN10	S100A10	ZNRD1	EGFR
EGR3		RPL22L1	ZNF91	IMMP2L	GYLTL1B	GTPBP4		NDUFV2	ODF3B	BCL2	NFYB	SKIL	DCUN1D1	DOCK5	MYL4	FAT2
HLA-DQB1		TRMT1L	CD2	TTLL7	RBMX2	SMC6		NUDT4	TLX2	CRISPLD2	CD164	CYTH1	KTN1	DUSP5	TREX1	HCRTR2
WNT7A		COX10	MKNK1	ATXN7	DZIP1L	TNRC6C		NFE2L2	ASCL1	TPCN1	ABCC5	NUB1	PLAT	MAML2	SERPINB6	ITGB6
CADPS2		MAP3K7	LCOR	VPS13A	ZIC3	EPS15		BTBD9	FGF8	SYNJ2	COX20	CREB3	ODC1	CD109	PKN1	SLC3A1
HLF		VIPAS39	IFNAR1	FAM126A	HMBOX1	PTPN4		RFX3	POU3F3	PTPRN2	POU2F1	GPRC5A	INPP5F	KLF10	RPL7L1	CEMIP
SPOCK1		NSUN4	RNF125	PLCG1	INSL5	VAPA		RPS6KA5	BHLHE23	CBFA2T3	MESDC2	MMP9	MYOM1	SERPINE1	NFXL1	GPR126
ECEL1		DDX49	SBK1	PMEPA1	PLA2G7	TRPM7		PIK3R1	SIX6	SHB	NUP88	REL	MUC13	ZNF366	MED18	LHFPL2
PRPH		TMEM11	MFSD1	CCSER2	FABP12	SPRED1		USP12	MFSD2A	SIPA1L2	ASF1A	DENND4A	PPAPDC3	BNIP3L	SF3B6	SEMA3C
FRZB		GSPT1	PLXNA1	SNED1	FMOD	MYO18A		ING1	SOX18	CEMIP	G3BP1	REPIN1	ARRDC4	UBE2H	GTF2B	COL26A1
ARG2		ZSCAN22	KLF13	EVL	MUC20	SEC14L1		HSP90AA1	RGS20	THRB	TOM1	FOSL1	TBCE	EPB41	UQCRC2	KCNK2
FGFR3		CCP110	EGLN3	PAK2	CPOX	KDM6B		FBXL14	PROX1	GNA14	SETX	FSTL3	CHORDC1	SLC6A9	PAFAH2	THRB
IL15RA		TIAL1	KCNA3	SIK3	KIAA0040	MIDN		RAN	MAFB	SPATS2L	ABCC4	S100A3	MANEA	ITPR1	AHSA2	FAM84B
SEZ6L		TIMM22	CYLD	EFCAB1	PACSIN3	ID3		MNT	BCL11A	CHN2	CEP68	DDA1	BLNK	WBP1L	TRIP11	LRIG3
WNT10A		KBTBD7	ELF1	QPCT	COL17A1	CITED2		PRCP	CBX8	NBEA	MTMR12	DLG4	ADCK1	UBE2V1	DXO	GNA14
KL		UBR4	MAP3K1	ZNF652	TMUB1	HES1		MLLT1	NRP2	NTN4	EEFSEC	PRRT2	SLC4A8	DOCK4	STK19	SPATS2L
SIAH2		EXO1	RYBP	CORO2B	TBX19	RBPJ		MAPK1	SKIDA1	ATP9A	PTTG1IP	TFPI2	NPHP3	GCLC	KATNB1	GRIK2
CACNB3		CWC25	FBRSL1	SORBS2	KCNH6	GSE1		HNRNPH1	TRAF4	DHCR7	ABHD2	F3	EFR3A	PHACTR3	USP38	MPDZ
CLIC6		RBM8A	DAG1	ACTL7B	SOAT2	ID2		HNRNPK	SEMA6A	RIN2	SLC7A5	MAP3K8	EPB41L3	TTLL11	DCAF12	CHN2
OLFM2		LLPH	WASF3	STIM2	SLC2A6	MTSS1		SLC25A51	TNRC18	FSIP1	FN1	SPECC1	HACE1	MYADM	CD2AP	ME3
ADAMTS1		PSMB4	KLF11	SDPR	MTHFSD	ARL15		EEF1A1	ARL4C	NBPF1	IRF2BPL	PLAU	GALC	IL31RA	POT1	EYA2
PLEKHH3		DDX46	ZCCHC14	PLXDC2	C14orf180	GCNT2		INPP5B	EPHA4	KCNU1	ATP1B1	ZC3H12A	CREG2	MEMO1	TMEM248	MAPKAP1
BAI2		ZRANB2	PWWP2B	PLEKHG6	STMND1	CALD1		LBR	MSX2	FBXW8	PAWR	SYNPO	CRELD2	KDM4B	STK11	FAM174B
FOSL2		GOSR2	MGST2	CNOT6L	CCL1	UCK2		PRKDC	NR4A2	RASSF8	SPRED1	TLDC1	VAPB	RFX2	P2RX7	NBEA
JUN		RPL34	AMPD3	OSBPL5	TRIM21	IL6ST		TAOK3	TLE1	IMMP2L	UBL3	MISP	ABCA13	LCMT1	CSF2RB	NTN4
LFNG		UQCRFS1	MYT1L	SSH2	RNF31	REEP3		TXNRD2	SALL1	TTLL7	RAI14	RASA2	RYR3	POU6F2	CDCP2	DCDC2
EFNB2		ANXA11	SLCO2B1	MARK4	PGC	TRIM2		COMT	TBX3	HLCS	ACTN4	WDR16	NRG1	ARHGEF12	PTAFR	NCKAP5
FRAT1		KRCC1	NUP210	TMC6	KRT75	AKAP1		CPT1A	TFAP2A	MLPH	ENC1	CD55	ADAM29	TRERF1	TMEM184A	ATP9A
GBF1		CTDSP2	ZBTB18	ATP8B2	ENTPD3	XBP1		SLC17A5	TFAP2C	MTAP	SRC	CREB1	LRRTM4	GRIK4	ATP6V0A2	RIN2
ZNF436		AGAP3	BLVRB	PPFIBP2	GPR143	OTUD7B		UBE2N	BDNF	BLK	SASH1	DIRC2	CNTN3	HAAO	FAM109B	DHRS2
PDE4DIP		CCNF	HIVEP1	LIMK2	REPS2	DSTN		DEDD2	PAX6	CORO2B	FSCN1	DCLRE1A	TNNI3K	VEGFA	COMMD9	FSIP1
BAIAP2L1		AP3D1	PIP5K1B	CAPG	LRRC14B	WEE1		MRPL52	GATA6	C21ORF33	KLF9	NHLRC2	CNTN5	CSF1	GGCT	NBPF1
GPRC5C		CMTM6	JAK2	CDH23	NOBOX	BMF		SLC7A7	MEIS1	TANC2	SOCS3	ZBTB1	LDB2	HSD11B1	COMMD7	FAM101A
DFNB31		OBFC1	PTPRA	CMTM3	MAVS	NQO2		GAN	PLEKHG3	PLXDC2	BCL2L11	ZBTB25	CNTNAP5	DGKD	IFNAR2	MIAT
GALNT9		CCDC58	BMP2K	TNFAIP3	CARD14	PICALM		NARS2	LEF1	CNOT6L	CDKN1A	PLEC	ROBO2	SORCS2	TFAP4	FAM102B
SYT2		C7orf55	SLC16A10	TBCD	UPK3A	MLLT10		SHQ1	NTN1	RAB8B	TGIF1	CLCF1	SUCLG2	MSRA	SMAD5	FBLN2
TSC22D3		CLK4	MBNL1	UVRAG	FADS6	KLF16		LIN28A	TENM4	ZAK	CITED2	MYO1G	TLR4	SLC25A26	CNST	EYS
NAV1		CD164	ST3GAL5	TK2	KRTAP5-1	PATZ1		MYC	FOXA1	OSBPL5	UBC	OLR1	CYYR1	TP53INP2	CHEK2	RARRES1
NR4A3		C12orf57	RHOBTB3	ZNF609	KIF27	TGIF2		KBTBD8	GATA4	HEY1	HES1	TMEM52B	DTWD2	TEX14	INO80C	PVT1
IFFO2		OPA3	FHL2	MFSD12	MAEL	CLCN6		SLC15A4	SOX9	PFKFB3	PTP4A1	IKBKE	TYRP1	RBFOX2	ARHGAP28	SLC1A7
PDLIM4		HNRNPA1	SLC7A1	UNC13D	TPP1	DIDO1		CDS2	PRDM16	IRS2	NQO2	CCNG1	B3GAT1	TM9SF3	ICA1	HLCS
RHOQ		PPM1A	CTSB	RCAN3	TMEM200A	GID8		RANBP3	TP73	PAG1	PRDX6	STX8	GPR149	PFKP	LRRC49	PLCG1
LMO4		HNRNPL	STK3	SMAP2	MMP19	MESDC1		WDR26	FLT1	PTPDC1	ANKLE2	NXT1	NPY2R	NOTCH1	OIT3	PMEPA1
ADAMTS5		COPS5	FAM213A	NFKB1	OR11H6	TRIM8		PLXNB1	GRHL2	SEC24D	NDUFV2	PCMTD1	GK2	FABP3	CISH	CCSER2
LRRN1		HNRNPUL1	SPPL3	IER3	LCE5A	SMG1		CLUH	HAND1	SH3TC1	SLC30A1	SEMA4C	KCNH8	TRIM62	NWD1	ACAP2
TMEM108		KAT7	STOM	FADD	CACNA1B	MSH6		KLHDC2	GFRA1	THRA	IER5L	ATR	KCNJ3	TCP11	BIRC3	SIK3
DOC2B		DARS2	STRN3	ELMSAN1	TBCA	SCD5		UMPS	PODXL	TRIB3	ZC3H11A	MAPK14	PCDH9	WHSC1	EXOC7	FAM43A
GRAMD1B		RPLP2	ACOXL	PTP4A2	CNGA2	IER5L		CDK12	BMP4	CAPN5	FCHSD2	HYPK	SLITRK1	YWHAQ	PLCB2	AKAP6
ITLN1		CASC5	GRHL1	VWF	MIP	NUAK2		MAML1	CLDN3	TMC6	FYN	FASTKD5	UGT8	TMEM106A	NUPR1	MTAP
RIPK4		CXXC1	TSNARE1	FRMD8	ITGBL1	HK2		STK38L	SHE	LIMK2	PPARD	UBOX5	KCNA4	MRM1	PDZK1IP1	CORO2B
DPYSL5		NBR1	SLC44A2	SLC25A45	NXT2	HNRNPLL		GPR19	GBX2	CAPG	PLEKHF2	PQBP1	APOB	CD2	CA13	ACTL7B
COL13A1		CAND1	CLMN	H3F3B	TIMM8A	PIK3IP1		NAA35	TAL1	CDH23	S1PR2	ZBED3	BRINP1	UBXN10	IL18RAP	CBLB
DNAJA4		VCPIP1	ERN1	ALLC	CCL22	KDM2B		TCF4	DLL1	CSK	CLTC	MRPS24	GRIA2	LCOR	RABGEF1	OPRM1
PTPRS		KIAA0907	RALGAPA2	FAM210B	MAMSTR	PLEKHF2		FBXO31	GAD2	TNFAIP3	TACC1	IL4I1	CADPS	MAS1	ZYX	PAM
PPARA		MRPL11	MACROD2	HPD	KLHL30	BTBD9		ENAH	GPR124	TBCD	OSER1	HSD17B8	LRP1B	IFNAR1	CAD	STIM2
TDRD1		TIMM9	XYLT1	MACROD1	USHBP1	FUBP3		PLEKHF1	CXXC4	UVRAG	PNRC1	MCM7	TOX3	RNF125	DCPS	SDPR
PDZRN3		COA7	LRP5	CRYM	GUCA1A	TFCP2L1		AGER	NES	TK2	RABEP1	LDLR	PHYHIPL	SBK1	PLSCR2	RASGRP3
SLC41A2		TMEM109	NEDD9	LPIN2	CXCR2	S1PR2		TP53	TRIL	ANP32A	BRE	TIMM17B	SEMA3E	MFSD1	IGSF5	TANC2
ALCAM		ARIH1	BCL2	EVI5	SLC15A5	SLC25A4		WRAP53	NKX6-2	RCAN3	NIT2	MAFF	TMC1	PLXNA1	HIBCH	INPP4B
TSC22D2		WAC	CRISPLD2	SPOCD1	GAPDHS	KHDRBS1		LEPROT	GADD45G	ABR	ZNF148	JMY	RPS6KC1	ZXDC	CTSC	PLXDC2
MAF		ZFR	RUNX2	COL9A1	CMA1	CLTC		RNASEH2B	FZD2	ELMSAN1	SIK2	IL6	SLC1A1	ARNTL	ARID5A	PLEKHG6
MECOM		PCIF1	DDR1	DNAH9	MED30	AHDC1		SLC39A10	RFX4	PTP4A2	PRDX1	PARP4	CDKN2B	KLF13	NAIP	ZAK
OBSL1		ILF3	GRK5	PDE9A	SLAMF8	ATXN2		WDFY3	LATS2	ISG20	GTF2A1	SMURF1	DCN	EGLN3	ATP2C1	FAM20C
ZNF800		RIC8B	TPCN1	DOT1L	CST11	NFAT5		UTP18	ATF3	VWF	REV3L	CYB561	NAV3	KCNA3	XK	SSH2
UBE2J1		HSPA4	PHLDA1	IPPK	C1orf111	CALM1		RNF141	BMPER	GADD45B	PFN1	AMH	SYT1	UBE2E1	PDHA1	THRA
P4HA2		RBM39	TBC1D8	LCORL	C9orf24	RPTOR		PAQR3	KIF26B	H3F3B	GCLM	PYCARD	AKT3	CYLD	RIPK1	TRIB3
ARFGEF1		VPS25	TTC39A	ZC3H8		CYB5B		FBXO9	DLX4	FAM210B	GOLIM4	MASTL	DPYD	ELF1	TMEM177	CAPN5
COL15A1		PTPLB	PTPRN2	RBM19		SNTB2		RANBP17	FGF3	MACROD1	SCFD2	FAM83G	SGCD	MAP3K1	RGP1	PXK
FLT4		SLC4A1AP	PCED1B	TLE6		CALM2		ZC2HC1A	EMX2	EVI5	HIPK2	ANXA7	VTI1A	RYBP	GM2A	MARK4
HMGN3		EEF2	PREX1	FAM178B		PIK3R1		USP14	HS3ST3A1	MAML3	ITSN2	ATOX1	GPR158	DAP	RORC	TMC6
NRAP		MTCH2	WIPF1	ZBTB38		TACC1		SUCLG1	TCF21	GSAP	FRRS1	ESPL1	MAP2	FBRSL1	LTF	SMTN
COL9A3		MGEA5	SNTG1	GNS		CHKA		MON1B	DDIT4L	SPOCD1	DNAJB6	DDX47	SH2D4B	DAG1	PRELID2	CDH23
TMEM181		PELP1	STAU2	ZHX3		GIT2		HERC2	ZNF536	COL9A1	MCFD2	UQCRC2	FBXW7	WASF3	KIAA0355	TBCD
CPE		HDLBP	KALRN	TAMM41		NSMAF		STX6	KCNS3	DNAH9	FZD7	PAFAH2	CDH12	ZCCHC14	CDK7	UVRAG
FAM98A		KDM3A	CBFA2T3	PTPRK		NDFIP1		SGIP1	LRAT	PDE9A	DUSP1	CYB561D2	ROBO1	PWWP2B	IBTK	STK24
ESRP1		UBE2D3	RHBDD1	RNGTT		HNRNPH1		DYRK1A	MLLT3	INSR	IRF1	NPRL2	SLC16A7	STK17B	TMEM220	CLASRP
ATP1B2		ACTR1B	MED13L	FGD2		ANLN		FAM20B	CCND2	SENP7	STAT1	SNAPC1	BASP1	ALOX5AP	ARG1	MFSD12
HDAC7		DHX9	THADA	SLC22A2		RASAL2		ZFAND3	PCDH7	DOT1L	CPT1A	DYRK2	LRRC4C	MGST2	ACCS	TMEM150A
TEC		CSE1L	ARSG	CDC27		KAT6A		OSBPL9	FIGN	IPPK	ST3GAL4	NOS1	BMPR1B	AMPD3	SMPD2	UNC13D
FAM131A		CC2D1B	BCAS3	TBC1D5		DDX5		PPFIBP1	NR2F1	LCORL	UBE2D2	ARF1	FHIT	MYT1L	CLASP2	FLOT1
CELF6		EIF4E2	CACNA1D	DYM		TRA2B		NBN	NR2F2	ZC3H8	IDE	LAMB2	FOXP1	SLCO2B1	ZNF93	IER3
DOK1		NTMT1	PITPNM2	GALM		PFN1		SENP6	TGFB2	RBM19	NSD1	SYNGR2	TENM2	ZBTB18	STARD5	DKK3
LOXL3		MED25	SIPA1L2	KIAA1551		PPP1R15A		FAF1	BHLHE41	TLE6	KRAS	ABCB9	TRPS1	JAK2	IFNLR1	ELK3
CDPF1		MPLKIP	ASCC2	SCAMP1		ATP6V1B2		NABP1	METRNL	FAM178B	SP3	ABCG5	CLVS1	BMP2K	ALDH18A1	FADD
SSTR2		HINFP	EML6	VPS54		CASP9		CENPN	CXCR4	ZBTB38	KCMF1	BIN3	SHROOM3	SLC16A10	FAM173B	ELMSAN1
DLX6		SLC25A1	FRMD5	AFAP1L2		ACSL1		CANX	FGF12	GNS	CDS2	F2RL3	CNTNAP4	ST3GAL5	VARS	PTP4A2
PDE1B		UBE2B	RABGAP1L	CAP2		CDC5L		GLO1	PAX3	ZHX3	GORASP2	HCST	SV2B	SLC7A1	HSPBP1	ISG20
KDELR3		USP1	RBM20	NHS		CSNK1D		BRAT1	GATA3	MYO5C	TNIP2	PTAFR	DNAH5	STK3	RAPGEF3	VWF
FBXO32		NFATC3	ATP8A2	ANTXR2		AP1M1		MED21	GRIA3	TAMM41	RAF1	DTX2	NYAP2	CLMN	C8orf48	FRMD8
PCDHGC3		THRAP3	EGFR	VLDLR		INPP5B		LTC4S	HAS2	BAG3	FTH1	ART4	KCNC2	DLG5	CNP	SLC25A45
PCDHGC4		RHEB	LHFPL2	UBE2Q2		GOLIM4		DAPK3	PCDH10	ITGA6	PKM	TREM1	NOVA1	FNDC3B	PER3	H3F3B
PRR16		SRSF6	GNA14	KCNK1		SCFD2		IDI1	CDKN2C	SNX24	TCF4	CD48	GRB14	CRISPLD2	PPP1R12C	ALLC
TSPAN18		POLR3B	NTN4	FAM92A1		RAPGEF6		PROSER2	HOXA13	LMO7	CEP85	SPI1	KIF5C	PTPRN2	MIRLET7B	NEU3
OXT		NCOA5	NCKAP5	MBOAT1		USP32		RPA3	EGR3	PTPRK	PSMG1	RHOG	AGTR1	PREX1	UPK2	MACROD1
DGCR14		BCLAF1	FAM65C	LOXL4		HIPK2		CRTC1	HLA-DQB1	USP46	ENAH	MTHFR	KCNRG	WIPF1	PINK1	MAML3
NEFH		DNAJB1	DHCR7	RNF144B		RNF38		VMAC	HEY2	FGD2	PLEKHF1	NSFL1C	CCDC33	CBFA2T3	PCCB	GSAP
DRD2		CAPN10	RIN2	BFSP1		ARID1A		NPM1	IGFBP5	DYM	YWHAZ	NCOA4	LINGO1	SHB	SFTPD	SPOCD1
MPPED1		HEXIM2	CDK15	GSN		RAB4A		RBMX	SERPINE2	FXN	KMT2A	CCND3	OLFML3	ARSG	CRLS1	DNAH9
PLK2		GTPBP4	YPEL2	NDST1		ITSN2		ARL6IP6	HLF	MDM2	SLC1A4	FAM65A	GAST	BCAS3	CASP12	INSR
KIAA1598		MLEC	C12ORF49	SH3RF1		HLTF		SGOL1	SFRP1	FAM160B1	DHX35	GPR56	TTC8	CACNA1D	EFS	SENP7
PTPN5		PHRF1	DHRS2	ITGA2		RALB		TOP2A	MEGF11	KYNU	ZNF330	STX1A	TMPRSS5	ATP8B4	CNGA4	TAMM41
RASSF2		NDUFB6	FSIP1	SUSD1		FRRS1		XPNPEP1	FJX1	RASEF	SLC12A8	F11R	COA4	SIPA1L2	C11orf52	BAG3
KCNK3		SH2B1	NBPF1	DSP		ARL4A		CDC25A	PRPH	VLDLR	SLC39A10	IFNAR2	MPPED2	EML6	ZBTB39	ITGA6
ACSS1		ATP9B	FAM101A	KIAA1161		IVNS1ABP		C1D	ADORA1	UBE2Q2	RASL11B	ANGPT1	HIPK3	CEP112	SLC35E4	DLG2
USP25		ARF6	MIAT	SPTBN2		ATP6V0A1		RPS27A	PRKG2	APP	FBXL3	CD34	JAM3	RABGAP1L	SHISA4	RNGTT
DUSP8		PHF20	FAM102B	NIPAL2		ATXN7L1		SMEK1	THBD	PRSS23	CEP120	CCDC64	ATP2B4	RBM20	CCDC122	FGD2
CCDC3		LYRM5	FBLN2	ZNF385B		DNAJB6		VCPKMT	COL4A1	KCNK1	RNF141	CCR7	S1PR1	ATP8A2	DENND6B	FOXN4
CAMKK1		DNAJC8	EYS	AIM1		LIMS1		DROSHA	COL4A2	SMARCD3	SNX18	EPHA1	ATL1	HCRTR2	STAMBPL1	SLC22A2
DOK7		MRPS35	RARRES1	KCNC1		FOS		PHIP	VWA2	ARHGAP24	ERCC4	INO80C	CABP1	CEMIP	WFDC3	SYNE1
CPD		GMNN	PVT1	TLL2		LAPTM4A		SRFBP1	PHLDB1	LOXL4	TMEM64	COTL1	CAPZA2	GPR126	KDSR	CDC27
SRF		ZMYM1	SLC1A7	TRAM2		INSIG1		PANK1	NPAS2	RNF144B	PPM1D	NINJ1	EXOSC9	SEMA3C	RAB10	TBC1D5
STAT5B		KIF18A	IMMP2L	EFHD2		SYPL1		ISCA1	HTRA1	ETS1	B3GALNT2	PRF1	IARS	COL26A1	OPLAH	DYM
GCH1		PKMYT1	TTLL7	EML1		MCFD2		SMARCC1	SHISA3	MYLK	TOMM20	PTGDS	RNF165	KCNK2	VSTM5	GALM
SLC8A3		DLST	HLCS	SCMH1		STAT1		MED1	COL8A2	TGFBR2	CAMK2D	IL12A	BANF2	PDE8B	TRIM6	RRAS2
IGFBP6		DDX17	MLPH	B3GALT5		CPT1A		ALDH9A1	PRRX1	BFSP1	EFTUD1	CLIC1	TULP4	THRB	C15orf57	MDM2
MEX3B		ABCC4	ATXN7	GFRA3		ADIPOR1		DCTD	TBX1	GSN	FDFT1	BIRC3	MYT1	FAM84B	FUNDC2	SCAMP1
TRPC4		CEP68	FAM126A	ZDHHC2		AGPAT5		COLGALT1	RET	NDST1	ABI1	APOBEC2	SCARB2	LRIG3	PSMB10	AFAP1L2
RHOBTB1		MTMR12	AKAP6	MOGAT1		LTBR		CDK13	CA7	RBKS	AZIN1	IL10	QPRT	GNA14	SECTM1	NHS
LEKR1		USP10	MTAP	TNR		DARS		VCL	WRAP73	SCNN1A	TAX1BP1	TNIP3	MAPK8IP1	SPATS2L	CYP2F1	PHLDB2
TTN		RALGDS	ZNF652	NNMT		KMT2E		PPP1R12A	IRF5	VSNL1	XXYLT1	C2CD4A	WDR11	CHN2	FCRLB	KYNU
AMACR		ANKRD27	CORO2B	ABLIM3		MSL1		WASL	PTGER4	PLCB1	SMARCA4	CA13	KIZ	ME3	ACTN2	PLOD2
LIX1		AP2A2	PAM	SBF2		SELT		IPO5	HOXA1	MET	DYRK1A	TNFRSF1B	SNAP25	EYA2	CYP4A11	ANTXR2
SNX16		EEFSEC	STIM2	SHANK2		TRIM24		KLHL25	CBLN1	NCMAP	HEXA	IFIH1	VSTM2L	FAM174B	ECHDC3	BAHD1
CPZ		PTTG1IP	AHR	PHF2		CAMKMT		VDAC1	CPEB1	SPTBN2	SMC5	SERPINH1	ABCA8	NBEA	HGD	UBE2Q2
NDRG4		DMXL1	TANC2	BSN		STEAP2		LRP10	MMP15	CREB5	ZFAND5	GPR108	TMPRSS3	NTN4	SLC22A1	APP
NEURL1		SPIRE1	INPP4B	OPTC		GORASP2		OXA1L	WNT11	KCNIP4	MAP4K3	SNUPN	ORC1	NCKAP5	SERPINA11	PRSS23
GOT1		TNRC6C	PLXDC2	FABP6		CHCHD1		TARS	FGFR3	ERBB4	TLK1	CDC37	UGT2B10	SLCO2A1	SYTL4	FRMD6
TUBB3		ADNP	PLEKHG6	KLHL3		RNF114		YPEL1	RAB20	GBE1	NPEPPS	WDR7	TMCO4	FAM65C	HMGCLL1	NFIL3
STMN2		CRKL	ATRN	PCBP3		RHOT1		ACBD6	TACSTD2	MFHAS1	MLH3	CD274	CCDC60	RIN2	OGN	KCNK1
ATCAY		HBS1L	SH3TC1	SORCS1		ZBTB41		OSBPL8	ARHGAP27	NIPAL2	ZSCAN2	CXCL2	VEPH1	CDK15	CLPX	SMARCD3
MOG		GPBP1	THRA	TLL1		RANBP3		SLC39A6	SEMA3F	ZNF385B	SCPEP1	RAB27A	TMEM144	C12ORF49	SLC25A30	FAM92A1
XRN2		TRPM7	ATP8B2	COL23A1		SH3GL1		UNG	GBX1	PPARG	CEP57L1	USP54	OASL	DHRS2	TPT1	HRH1
PURA		ACTN4	LIMK2	MYO16		PRKRIR		HOOK3	WNT6	VSTM4	RPLP1	NOTCH2NL	SOCS5	FSIP1	KIAA1191	ARHGAP24
C1orf106		RBPMS	SMTN	WSCD2		GPR19		MYCBP	LARP1B	AIM1	ZWINT	CLDN2	SH3GL3	NBPF1	TRAF1	LOXL4
C17orf53		SKAP2	CDH23	AFAP1L1		ZBTB45		ATP5C1	HHIPL1	TRAM2	PPIF	ALDH3A1	LGALS9	FAM101A	EIF4E	RNF144B
SYNCRIP		ANKRD10	TNFAIP3	DUSP7		NAA35		KIN	TSHZ1	FZD6	MRPL57	BACE1	CIITA	MIAT	TRIM55	ETS1
NANOS3		CTGF	TK2	NFIC		TBRG1		SMEK2	HLX	NIN	PPP1R15B	GGT1	CDH5	FAM102B	ABHD14B	MYLK
PPP1R16A		GRHL3	STK24	ZNF787		FTH1		GTF3C3	MGLL	SGPP1	FAM104A	G6PD	ASUN	FBLN2	STARD3	TGFBR2
AKTIP		TPD52	MFSD12	BEGAIN		MDC1		IGHMBP2	NFATC1	PPP1R3B	ADRM1	SIX4	GNG2	EYS	LCN2	GSN
RRN3		SULF2	TMEM150A	GRIP2		TUBB		MRPL21	KIAA1804	MGAT5B	MAP3K4	SERPINB1	DHRS7	RARRES1	ALDH3B1	NDST1
C17orf96		CTNNB1	UNC13D	GRAMD4		AP1G1		BCL2L13	NAGS	GALNT13	ARFGAP3	LTF	RRAGC	PVT1	EIF2AK2	RBKS
PDE4A		ITGB1	SMAP2	KIF6		BRD4		TBC1D22A	DHH	ADAM12	NR1D2	RAG2	STX2	KCNU1	SERPINB5	SCNN1A
UHRF2		SASH1	NFKB1	PSD2		BZW2		ELP2	NTNG2	KCNJ6	RABGGTB	IL2	AHI1	SLC1A7	PLEKHM1	VSNL1
TAC4		SLC6A6	DKK3	RAB11FIP3		MEF2A		DCAF13	EVA1C	DRD1	NCAPD2	CR2	RRS1	FBXW8	CLDN12	CRIM1
BCAT2		KLF9	PTP4A2	ANKRD9		USP3		SLC25A32	GLIS1	ANO5	FLVCR1	IZUMO1	FAM161A	RASSF8	GDF5	PLCB1
YWHAG		BCL2L11	VWF	FAM173A		LRRC61		NAPG	RTN4R	KCNQ3	LAMTOR2	NBEAL1	QTRT1	IMMP2L	ADHFE1	HSPA4L
SESN2		FAM129B	ALLC	SCUBE1		BAZ1B		DHX30	KCNQ1	EDIL3	AURKB	TFCP2	UBE2Q1	MLPH	UAP1L1	SNX7
ELAVL2		CYR61	NEU3	TUBA8		YWHAZ		SLC30A5	DLK1	BAI3	UBXN6	PGK1	ARAF	VPS13A	FAM109A	MET
ETV5		CDKN1A	FAM210B	COLEC12		WRAP53		PACRGL	GATA2	CSMD3	USPL1	FAM103A1	NPEPL1	FAM126A	GPR137	MIPOL1
GRSF1		PIM1	HPD	SHANK3		STAT6		METTL16	SGCB	ADAMTS2	GAPDH	SMPD2	CCNK	PMEPA1	NLRX1	PTK2
LAP3		SPRED2	MACROD1	PDGFB		ASS1		DCAF10	CD83	RAP1GAP2	UBE2Z	ZBTB14	SQLE	CCSER2	TGM1	CD36
TMEM57		ZFP36L2	CRYM	ITGAM		BST2		WARS2	FHDC1	MYO16	DESI2	NPY1R	MYEF2	SNED1	C9orf85	DFNA5
CEPT1		TJP2	LPIN2	VWCE		GINS3		ROCK1	KLRG2	JAZF1	IPMK	GUCY1A2	PDS5B	PAK2	ISCA2	CLDN1
TCEAL8		REEP3	EVI5	SEC14L2		HERC1		MYO6	GFRA4	PARVA	SNX13	MTHFD2L	ERICH3	ACAP2	FBXL20	SUSD1
ZNF512		TRIM2	MAML3	SNX8		DUSP12		ZDHHC17	KL	DCLK1	TBC1D12	TRPC1	ZNF280C	SIK3	NISCH	TMEM45B
DCTN2		DSTN	GSAP	UBTD2		STX11		EIF1AX	SIAH2	GALNT7	RPS27A	PCSK2	TSPAN13	VPS8	SLC5A5	DSP
TFDP1		PTP4A1	SPOCD1	STK10		C2CD2L		NEMF	LTBP2	SLC44A5	XPOT	DICER1	ZNF207	EFCAB1	EPHA8	MLLT4
CASP3		TSC22D1	KIF3C	CMBL		RDH10		FNTA	OCLN	ST6GALNAC5	ATF1	MAFG	CHRNA1	QPCT	TTC22	CREB5
LRPAP1		WEE1	COL9A1	HPCAL1		PTRH2		SUB1	PPM1L	DUSP7	UBE2V2	SPATA2L	SAP30	FAM43A	OLFM4	KCNIP4
PHTF2		HSPB1	DNAH9	RAD50		EIF4EBP1		PDIA4	ARSI	ZNF787	NFE2L1	TBC1D10A	MFNG	AKAP6	ARHGEF38	ERBB4
USP5		PACS1	PDE9A	LATS1		HELLS		MIB1	NPY	ANKRD9	PGD	RAPGEF3	RABAC1	ZNF652	PROM2	LHFP
C20orf96		TSPAN15	INSR	PRPSAP2		AK1		PRPF4B	STK32A	SCUBE1	MKRN2	PDLIM7	ADCY9	BLK	HLA-A	GBE1
GPS1		KLF16	SENP7	CD58		CUEDC2		PRKAA1	BACE2	COLEC12	PSMD11	MADCAM1	MAP2K5	CORO2B	SLC6A18	AIM1
LHFPL5		GNA13	ST18	FAM83F		ZNF428		SSR3	COCH	SHANK3	TKT	LTBP4	ST3GAL3	C21ORF33	MIR145	KCNC1
HYAL3		MOB4	TG	SYNRG		CISD1		NCK1	PTH1R	PDGFB	COQ7	ADH1A	PJA2	SORBS2	PLEKHS1	TLL2
PLK3		SMG1	RBM19	PRMT2		SNX18		TRIM27	SP5	ITGAM	TUBA1C	TERT	ZDHHC7	CBLB	SLC38A7	PAPD5
TMEM184B		ANKLE2	TLE6	ERG		CCNA2		TYW1	HSPA2	ITGB2	BBS9	TNFRSF10B	PTPN11	OPRM1	FYB	TRAM2
FBF1		NDUFV2	ZBTB38	GMPR		CCNE2		MSMO1	PRKCDBP	SEC14L2	DCTD	UGP2	VAMP3	RASGRP3	TMPRSS13	FZD6
CHAC1		NUDT3	ITGA6	QSOX2		ERCC4		CCDC88A	GPC1	SNX8	CDADC1	MID1IP1	DCUN1D4	AHR	HERC3	NIN
WDR78		FAM91A1	USP46	ROPN1L		TMEM64		NOL10	TIGD5	UBTD2	METTL9	GALNT18	IKBKB	TANC2	MSRB1	SGPP1
PLCXD1		GLUL	DYM	HS1BP3		FBXO7		PPID	CNTNAP1	STK10	MALAT1	NIPA1	TAGAP	INPP4B	SLC25A29	SCMH1
PVRL2		LDB1	FXN	ANK1		KLHL24		TXNL1	PLEKHH3	RCBTB2	POLR3K	TPT1	POU2F2	PLXDC2	NRROS	GHR
TMEM125		PIK3IP1	KIAA1551	GPR132		USP14		FBXO42	CNPPD1	RAD50	WDSUB1	IRF4	PTOV1	PLEKHG6	SH2B2	IGDCC4
PANK3		PLEKHF2	ANTXR2	TNFSF10		ZPBP		IRAK1BP1	C1orf115	RAB31	PPP1R12A	TRAF1	USF2	CNOT6L	SLC7A4	PPP1R3B
RHPN2		RALBP1	KCNK1	EXOG		URI1		RBM33	FAM78A	CD58	FANCL	FECH	POGK	RAB8B	ELOVL1	B3GALT5
SLC31A2		ZC3H3	MBOAT1	RIC3		CENPQ		EIF2AK3	RASL10A	PRMT2	PIGK	TRIM55	SHMT2	ZAK	GBP3	DOK6
RGS9		RPS6KA5	EREG	CCL17		ANP32E		BDP1	CDKN2A	QSOX2	POMP	CYBA	PRPF40B	FBXO16	TRAF6	KCNJ5
TOB1		TBC1D15	RNF144B	IL16		TMBIM6		LCLAT1	KCNK6	ROPN1L	TTYH1	LTB	RCOR3	PAG1	PHTF1	ARHGEF28
LIMA1		LRRC1	ETS1	RYR1		CCNG2		AKIRIN1	ADRB1	ANK1	VTA1	LTA	BCO1	PTPDC1	ARF3	IL1RAP
ACTR3B		SLC12A7	MYLK	DHCR24		NFX1		NIPBL	AMER2	GPR132	PCNT	PTGIR	CROCC	SH3TC1	ZNF354A	MGAT5B
CDC14B		ATG10	TGFBR2	SCARB1		TPP2		MKLN1	ADM	TNFSF10	CRELD1	TNF	UBL4B	CELSR1	ZNF43	PYY
AVPI1		SOS1	BFSP1	STEAP3		MON1B		GAK	FOSL2	EXOG	OSBPL8	TRIOBP	TNFRSF18	SSH2	ZBP1	FAT3
CSRP1		NRF1	GSN	GPR97		CRADD		GTF3C1	JUN	CCL17	IPO9	P2RY6	ERC2	SIN3B	ANKZF1	NPSR1
SEMA4B		AFF4	NDST1	SAMD14		MAPRE1		SKP1	LFNG	DHCR24	KANSL2	LCN2	NFAM1	TUBG1	ATG9A	KHDRBS3
SPIRE2		NFAT5	PLCB1	SKA1		ZCCHC2		FAM49B	SPRY1	SCARB1	HIBADH	TRIM69	TBK1	PPAT	RAB25	PCNX
PER2		XPO1	PTK2	CTR9		ZCCHC11		MRPL39	EFNB2	ELOF1	NLN	BGN	ZNF322	SPATA13	ISPD	PDZD7
SEMA4G		CALM2	CD36	GPHN		ATG4C		POP4	FRAT1	SKA1	SENP5	DNASE1L2	CIT	TTI1	PRODH	TNR
SLC39A14		PIK3R1	SH3RF1	PTPN14		PANK2		OSGIN2	PDE4DIP	GPHN	CARF	DPP3	DEPDC1	USP31	CASP4	TGFA
COL16A1		TACC1	ALDH5A1	TIMP3		NBN		GLCCI1	BAIAP2L1	PTPN14	DHX40	EFEMP2	GXYLT1	AES	MRPL22	FGF2
LMBR1		CHKA	KIAA1161	DSTYK		SENP6		TRIM13	DRAM1	MTA1	TBC1D22A	MDK	SC5D	THRA	C4orf32	NNMT
PLA2G4E		TM9SF2	NIPAL2	MPPE1		MOB1B		PI4KA	ISLR2	RASA3	NEK1	SERPINA3	RPAP3	TRIB3	LACC1	FAM19A1
GPR179		HSP90AA1	EFHD2	RASA3		FAM174A		MRFAP1	CHSY1	ATP1B3	CDV3	GLRX	ZNF326	MARK4	IKZF4	SBF2
OR2B11		RAN	GHR	ATP1B3		STIP1		UNC45B	ITPKB	STT3B	ZNF761	RFFL	FAM117B	SLCO4A1	IL10RB	CNTNAP2
CD300LD		PIM3	PPP1R3B	STT3B		HMGN1		CEP70	CPEB2	DDX59	TBC1D23	RILPL2	RBBP6	LIMK2	KBTBD13	DNAH11
PRR15L		NUP50	OAF	DDX59		PSMB2		CMTR1	LPGAT1	FAR1	ZZEF1	PBX2	SREK1	TNFAIP3	IL1RL2	GALNT13
ACKR4		GIT2	KCNJ5	ARL4D		ARHGEF7		XPO6	ICMT	ARL4D	SOD1	GALT	ST6GALNAC2	UVRAG	LYZL4	FRMD3
PGA5		TMEM55B	MOGAT1	MRPL14		CDC42SE2		DHDDS	MAP6	CCDC34	MTDH	HSD11B2	KCTD13	ZNF609	TNFRSF11A	SHANK2
RBPMS2		FRYL	CDKL4	DIAPH3		CXADR		PIAS4	ESRP2	DIAPH3	ZDHHC17	EHD2	METTL13	SMAP2	C19orf57	KIAA1755
TJP3		GET4	FABP1	AGPS		NF2		FMR1	PHLDA2	HNRNPM	ZNF438	IL11	ZNF217	BCL9L	CC2D1A	GSG1L
ARHGAP8		TTL	ARHGEF28	KIDINS220		NPEPPS		AKR1B1	GPRC5C	GTSF1L	FNTA	LSR	SNTA1	NFKB1	CTAGE5	PHF2
TFE3		IFNGR1	IL1RAP	SUV39H1		PGS1		SWAP70	SLC30A2	SLC39A11	SUB1	GPR137	SCN2A	XDH	SERTAD4	FABP6
FTSJ1		NDFIP1	MGAT5B	EHBP1		ARHGAP17		2009-07-01	IFFO2	SLC41A1	ZDHHC20	TGM1	LGMN	FLOT1	TRABD	KLHL3
TEX36		EIF4A2	PYY	PLAT		TMEM59		TNFRSF21	LMO4	AGPS	TXNDC11	ABCB4	FKBP10	IER3	ARHGEF16	LYPD4
AASDH		HSPD1	FAT3	MTTP		N4BP2		SNRPD1	NTF3	KIDINS220	ABHD17C	RHCG	DNAJB3	DKK3	ACVR2B	FAM105A
L2HGDH		AFG3L1P	NPSR1	G3BP2		UTP6		LIG4	CXCL12	ATXN10	ABHD5	KCNJ15	SH3PXD2B	ELK3	GFOD2	FAM19A5
MYH14		HMGN2	KHDRBS3	GLYCTK		TMEM138		BCAP31	PRR15	GPR128	TXNDC5	POMC	ZNF827	ELMSAN1	TNNC1	PCBP3
SCGN		KLC1	PCNX	PPP1R21		ZWINT		SNX14	UGT1A1	LY9	SOAT1	IFNG	IL27RA	ISG20	C9orf64	ADAM12
PEX13		PRDX1	TNR	HDDC2		CROT		PTCD2	CXCL14	PSMA6	BBS5	PLCE1	TPPP	VWF	ALDOC	KCNQ3
MBIP		ANLN	TGFA	SPIDR		UNC119		ELOVL7	DPYSL5	RFX7	PDIA4	PTGIS	SLC35G2	FRMD8	ZNRD1-AS1	BAI3
HLA-E		FUBP1	CGNL1	WSB1		RHBDD3		PTBP1	PRKAR1B	TANGO6	SNX4	HLA-A	KANK4	SLC25A45	IL15	CSMD3
SP110		REV1	DPYSL3	ARNTL2		COA5		MTRR	PGBD5	ATE1	EPM2A	CD74	EXTL1	GADD45B	COL24A1	ADAMTS2
PLEKHG5		CEP95	NNMT	DMXL2		PHLDA3		SQSTM1	DNAI1	PDHX	PRKAA1	FAM111A	CYP27B1	CRYM	CARD6	TLL1
DUS1L		RANBP2	CNTNAP2	GLB1		RPP25		DAB2	IRAK3	DCUN1D1	SSR3	MX1	RASGEF1C	LPIN2	PROL1	RAP1GAP2
ACVR1B		EIF3A	DNAH11	SCLY		PPIF		ADI1	MAPT	SUV39H1	RPS15A	MUC17	ACOT1	EVI5	CSN1S2BP	COL23A1
DEF6		TRA2B	TMEM98	INPP5F		TMEM70		KLHL26	GPSM2	ETF1	GPCPD1	PRL	PALM2	MAML3	SGK2	MYO16
RAB1A		EEF1A1	FRMD3	MYOM1		DDX39B		CCDC14	PTPRS	MTTP	OLA1	UGT1A6	LOC646862	GSAP	PIK3C2G	JAZF1
ARAP1		TOR3A	SHANK2	MUC13		PPP1R15B		PTPN23	PPARA	G3BP2	ZNF208	ARL14EP	NRARP	SPOCD1	FAS	PARVA
UNC13A		USP36	GSG1L	PPAPDC3		AKAP10		ZNF169	TDRD1	GLYCTK	CKAP2L	C16ORF46	APOM	KIF3C	GYLTL1B	DCLK1
NAT14		KIAA0895	PHF2	MGAT4A		FKBP8		ESCO1	ADAMTS18	PPP1R21	WAPAL	ZNF33A	GPC3	PDE9A	PEX16	GALNT7
STX5		GOLIM4	BSN	PMP22		NUDT9		MED15	NEUROD1	ADCK3	LIFR	F8	ADRA1A	ST18	USB1	SLC44A5
WDR74		RAPGEF6	OPTC	ADCK1		RABGGTB		GATB	NDUFB4	MIER1	ROCK2	HAS1	PPP1R26	IPPK	MOS	ST6GALNAC5
ZNF628		RAB4A	FABP6	SLC4A8		CLPTM1L		PEX26	AMIGO2	TXLNB	BMPR1A	ATP1A2	EBF4	RBM19	PANX3	WSCD1
PAQR4		DUSP1	KLHL3	HACE1		ABTB1		SP4	CAPN2	HDDC2	TM4SF20	B3GAT3	GSC	ZBTB38	GPR155	WSCD2
ETNK2		FAM120B	PRIMA1	GALC		KLHDC3		NOM1	TTC39C	DUSP16	TP53INP1	SRCAP	PRMT8	GNS	IFT43	AFAP1L1
SYT7		SUPT3H	CSMD3	CREG2		ACAT1		UPF1	DKK1	SPIDR	CAPN7	IRF7	NPTX2	ZHX3	BARD1	FOXK1
TBKBP1		OGFR	PPFIA2	GUCY2C		HNRNPC		FASTKD3	SOCS2	LOC81691	PPP2R5E	BTBD19	ATOH1	MYO5C	ARL1	NFIC
ATG9B		STX18	RAP1GAP2	FAM71A		PCF11		PSMG3	DACT2	TTC28	YES1	PTS	DPYSL4	ITGA6	PSMD4	PEPD
CHRM4		IRF1	COL23A1	VAPB		PRKAG1		EZH2	FAAH	ANKRD28	EIF3H	RDH5	DLGAP3	SNX24	TAF4B	SCAP
GLP1R		TXNIP	JAZF1	TPO		SLBP		TAL2	RUSC2	PMVK	OAT	PLEKHG2	OLFML2A	LMO7	SLC5A6	BEGAIN
ESPN		ACOT7	DCLK1	CNTN5		FBXL6		RUFY1	MSI1	ODC1	SARAF	UNKL	FZD10	PTPRK	PRAMEF8	GRIP2
COL5A1		ADD1	GALNT7	TLR4		TBC1D17		RAB23	ERBB2IP	TIPARP	DYNLL2	PTK6	INHBB	USP46	TSPAN8	GRAMD4
PPP1R9B		EHD1	ST6GALNAC5	ADAMTS9		MEPCE		DGCR8	ZNF800	GLB1	TMTC4	TMEM75	SCRT1	DLG2	NUMB	KIF6
SCN2B		TXNRD2	WSCD2	APOB		UBQLN4		UCK1	PABPC4	SCLY	FAM49B	TPPP3	VGF	RNGTT	TNFSF8	PSD2
CCDC173		SLC17A5	DUSP7	BRINP1		GABARAP		BLVRA	SHISA2	RNF122	MCM9	CASP4	SYPL2	FOXN4	SLC9A4	ANKRD9
PPFIA3		DEDD2	ANKRD9	AKAP2		PHF23		GNA12	RTN1	TMEM86A	MAGOHB	MT3	CRMP1	SYNE1	CYP39A1	FAM173A
HPS1		FRAT2	SCUBE1	EHF		MAZ		UTP11L	C14orf39	ZNF18	POLQ	CALCB	INA	CDC27	ACADSB	SCUBE1
CYHR1		LYSMD3	ITGAM	TMC1		MAP3K12		AGA	COL14A1	ARRDC4	DHX37	VHL	RRAGD	TBC1D5	IKZF5	TUBA8
IRGQ		KIFC1	VWCE	CDKN2B		FLAD1		KLHL42	P4HA2	CHORDC1	EXOC2	HAVCR1	EPC2	DYM	LGALS8	COLEC12
DBP		TCTEX1D4	ITGB2	VTI1A		RBMX		CSRP2	EMP2	MANEA	FAM179A	PDCD5	TMC7	GALM	SAT1	PDGFB
ZBTB7B		MRPL52	SEC14L2	CD180		FTSJ3		TTF1	GNAO1	MSH3	PPP2R5A	BRI3BP	FAM86A	FXN	ARHGEF5	ITGAM
EVPL		SP3	SNX8	SH2D4B		UFC1		CCDC91	FAM114A1	BLNK	NENF	SLC48A1	PMAIP1	RRAS2	RNASE1	VWCE
MMP14		MTA3	STK10	GPATCH2		CAPZA1		ZNF519	SMOC1	EML5	CEP70	PTGS2	LEMD1	INADL	FES	SNX8
ERCC1		THUMPD3	BRF1	BASP1		MRPS14		NDNL2	METTL24	RAD54B	TSEN2	KISS1	CDH3	KIAA1551	FLT3LG	UBTD2
ZBTB4		CAMKMT	RCBTB2	LRRC4C		NAGK		NHLRC1	CNNM4	MYOF	RBM38	PANX1	GPRC5B	SCAMP1	GRK1	STK10
SEMA3B		OMA1	FLOT2	TRPS1		EIF1AD		OXNAD1	MYCL	PTPN3	LRIG2	CXCL5	GNAS	VPS54	CD72	RCBTB2
MID1		SLC15A4	CMBL	CLVS1		ITFG2		MAP4K5	PDGFRA	SLC22A15	OPA1	CXCL1	KCNJ4	TMEM38B	IL13RA2	CMBL
APOOL		RNF114	HPCAL1	SHROOM3		ATP5B		ABHD13	ESRP1	PKP2	CABIN1	ENO2	COMMD3	FAM160B1	PIR	HPCAL1
PAPSS1		RHOT1	RAD50	PBX1		SGOL1		NECAP2	MMP16	PMP22	RICTOR	SLC34A2	TMEM30B	RNLS	CLDN8	RAD50
NEK7		RANBP3	LATS1	TRIQK		CKAP2		MCOLN1	MOCOS	EFR3A	SPHK2	PLEKHH2	KLF5	KYNU	LGALS12	LATS1
CELF3		BRPF3	PRPSAP2	KLF4		FUT11		TMEM175	CDPF1	POSTN	GZF1	PHLPP2	KLHL21	PLOD2	RNASEL	PRKAR2B
PTP4A3		ARRDC2	PRKAR2B	LYZL1		VPS36		MGAT4B	POU4F1	COL6A1	HBP1	SNCAIP	TRIM44	RASEF	CEBPD	RAB31
AAAS		JOSD1	RAB31	ADORA2B		ATP6V1F		ORAOV1	DONSON	UBE2E3	GRN	SLC36A4	ACVRL1	APP	UBXN7	RMDN2
RPP14		TNIP2	C14ORF182	PPP1R17		ZNF317		EXOSC3	KDELR3	LRRC17	2009-07-01	PPAPDC2	LGR5	PRSS23	NOD2	ERG
LYRM7		SLC26A2	CD58	ODF1		TOP3A		HIATL1	LARP6	ADAM29	MAPK8	NANS	ALK	FRMD6	PLA2G4A	GMPR
CCDC86		CARM1	FAM83F	XKR5		PPME1		ZNF574	PCDHGA10	LRRTM4	RAB24	GEM	RIMS4	NFIL3	TNC	QSOX2
RPRD2		GNB1	SYNRG	CD8A		ZNF112		PYGL	PCDHGA12	LDB2	CHIC2	TNFRSF9	RAP1GAP	SMARCD3	TMEM261	DNAJC5B
GAR1		CLUH	SLC35F6	C1QTNF9		MRPL50		USP18	PCDHGB3	SUCLG2	SLC16A6	SP7	ADAP2	LUZP2	FAM115C	ZSWIM6
TRIM39		HNRNPF	ERG	LINGO1		RPP38		NDUFA4	GPR101	DDHD1	IDH1	STAT5A	CLSTN1	SGCZ	KLHL33	HS1BP3
OS9		KLHDC2	GMPR	ADORA3		MEAF6		ZCCHC10	PCDH17	SLITRK6	SQSTM1	ADCK4	WNT2B	ARHGAP24	FMO2	LGALSL
PPP1R11		UMPS	QSOX2	LTBP1		NACA		NUBP1	APBA1	TECRL	FEM1B	PDCD2L	HS3ST2	ETS1	IL36G	SUN3
ACO2		CHMP5	ROPN1L	STC1		UBE2V2		YIPF3	LY6H	TYRP1	TXN	FCGRT	ADAMTS16	GSN	CACFD1	ANK1
KRR1		RNMT	DNAJC5B	TNS4		ABCB8		MCM10	UPB1	KCNH8	PEAK1	SRGN	OTUD7A	NDST1	NEU2	GPR132
AURKA		TRIP12	ZSWIM6	ATP2B4		YARS2		MRPL42	ERBB2	KCNJ3	PRKCD	LRRIQ1	FAM135B	CRIM1	SCARNA6	CD86
CSTF1		CSNK2A1	LGALSL	S1PR1		CBL		KIAA0196	ESYT3	PCDH9	KIF1B	SAR1B	ASIC2	HSPA4L	MS4A6A	TNFSF10
KIAA1143		QRICH1	ANK1	SLC40A1		ATAD2		PNPLA6	SLC10A4	SLITRK1	MAT2B	IL15	ASTN2	PLCXD2	IGSF6	STEAP3
KIF15		STK38L	GPR132	TPD52L1		PHIP		TCOF1	FGFR4	UGT8	DLGAP5	C10ORF11	DAB1	MIPOL1	GBP7	GPHN
FASTKD2		GPR19	TNFSF10	C1orf116		CALM3		ARV1	PPL	SETBP1	ADO	C4BPA	DPP6	PTK2	ASPN	PTPN14
MDH1B		ZBTB45	EXOG	C1orf21		FAF2		TTC13	ALOX12	RPS6KC1	AKR1A1	FFAR2	ATP2B2	CD36	ABRACL	TIMP3
NKIRAS1		TBRG1	RIC3	PIK3C2A		BRIX1		SEC61A2	CDKL1	GULP1	KREMEN1	CCL5	GRIN2A	SH3RF1	PPIL6	DSTYK
BAG6		TCF4	CCL17	STOX2		TPM3		MAOA	CTPS1	AKT3	SPTSSA	PWWP2A	SLIT1	DFNA5	PHYHD1	MPPE1
HMGB2		KIAA0430	HNF4A	SMARCA5		KNTC1		TOM1L1	ACADL	CPVL	E2F2	CCL19	BMP7	CLDN1	GBP6	MTA1
UTP3		NDE1	IL16	GPR39		TRPC4AP		PEBP1	ERP29	GAP43	SLC52A3	MST1L	IGSF21	ITGA2	PGLYRP1	RASA3
EPM2AIP1		AP1G1	RYR1	BAHCC1		PASK		XRCC6BP1	PAPD7	PPP1CC	HIST1H1C	IL1A	SEZ6	SUSD1	GPR55	KLHDC1
ABT1		CCNL2	DHCR24	BBC3		ALDH9A1		SNRPF	FSD1L	DPYD	ALDOA	GZMB	BTBD11	CSMD2	PSME2	SCRT2
CCT3		BRD4	SCARB1	LACTB		SCAMP4		SPATA21	A4GALT	SGCD	ANGEL1	NEO1	CACHD1	FRK	RNF31	MRPS26
MTMR4		BZW2	STEAP3	CAPZA2		BFAR		RAP2A	FNBP1	VTI1A	ST5	FAS	CACNA1E	EFCAB12	PSMB8	RBM17
PRPF4		FLCN	GPR97	EXOSC9		SNX32		PLAU	PVRL3	ZBTB43	SMNDC1	NOS2	PAX5	CREB5	SNORD15A	DDX59
RPL23		CEP85	SAMD14	TSPYL4		MTHFD2		HSPB8	GOT1L1	FARP1	ADAMTSL4	APOD	PTPRU	KCNIP4	GPRIN3	GLRX3
RBM3		MAT2A	ELOF1	EPB41L2		ECE2		MISP	DNAJC6	ACKR3	CA2	IDO1	FOXA2	ERBB4	POC5	SPATA6
TMEM33		BAZ1B	SKA1	PPP4R1L		METTL8		CREB1	PIPOX	GPR110	TMEM179	CXCL11	SLC16A9	LHFP	SPEF2	MRPL14
TFIP11		INCENP	CTR9	LPO		FBXO48		WDR37	PIRT	CD180	SPEN	DIO2	LRRN2	GBE1	PYGB	DIAPH3
U2AF1L4		HERC1	PTPN14	CBX2		IFRD2		CDCA7L	HOPX	SH2D4B	TTC9	TFEC	SATB2	ZNF385B	AMIGO3	AGPS
ATG5		ARL5B	DSTYK	CRB2		PRKAB2		RMI1	SPATA24	SAMD12	SLMO1	IL1B	PRKG1	AIM1	CPTP	ATXN10
EMC4		TWISTNB	MPPE1	C1ORF116		TBCCD1		ATP6V1E1	TMEM51	FBXW7	AGA	VCAM1	TMEM132D	KCNC1	OR10G2	GPR128
PIGM		AGFG1	MTA1	WDR88		TMEM165		METAP2	JAKMIP1	CDH12	AGL	ART1	GAD1	FZD6	NUDT7	LY9
RIOK1		CDCA7	RASA3	KU-MEL-3		METTL9		BCCIP	NODAL	ROBO1	FGD3	CCL28	SLC6A20	TMEM117	CCDC74A	RFX7
DCP1A		PAPD4	KLHDC1	SLC17A4		CTBP1		MTIF2	G2E3	SLC16A7	C12orf66	ENG	LHX1	SGPP1	NNT	TANGO6
STX16		F2RL1	SCRT2	COL25A1		COLGALT1		SCFD1	WSB2	LPHN2	BET1	TFF3	BRINP3	SEMA7A	ELF3	TXLNB
MED23		OAS2	ATP1B3	GPR137B		GMPS		KARS	WWC2	SPAG16	WASF1	SLC8B1	IL20RA	EFHD2	N4BP3	SPIDR
NCBP2		WDFY3	GPR128	MYT1		FLYWCH1		NVL	NEURL1	NAALADL2	CCDC91	UPF3B	RPRM	RASSF5	CAPSL	LOC81691
PURB		UTP18	PPP1R21	CFB		RAD51		TERF2IP	GSTP1	SI	NEUROD4	CXCR1	GRM1	EML1	CSN1S2AP	TTC28
CCNC		CEP120	EXOC6	TMEM217		VCL		SBDS	PPP1R14A	GPATCH2	EXD1	DTX4	YAF2	SCMH1	SCG5	ETFA
NOL9		C20orf194	ETFA	CYB5A		SMPD1		ELP6	IGF2BP1	SLC4A3	ZNF519	FKBP15	IRX4	GHR	SYNE4	USP24
SSR2		IST1	PMVK	KIAA1324		PRPF18		PNPT1	L1TD1	BASP1	ZRSR1	NEU1	MCC	PPP1R3B	MUC15	PMVK
CIRBP		ZC2HC1A	ODC1	RAB42		KIAA2013		KIAA0020	SLC38A4	FHIT	SMG6	NFKBIB	SYNDIG1	GPR125	CDHR1	UBE2R2
PUF60		NFRKB	GLB1	VSTM2L		OXA1L		TOMM7	SLC10A7	FOXP1	SLC25A35	TAF4B	SPOCK3	AOC3	DHRS13	WSB1
CCNL1		PTGES3	AGFG2	BPTF		LARS2		ACTR2	TPK1	KLF12	ZBTB8A	TRAF2	TMTC1	MOGAT1	IL18BP	INPP5F
GNB2L1		TMEM64	INPP5F	LRP12		LIAS		KDM1B	GOT2	TRPS1	TSC2	KLRAP1	ZFHX4	CDKL4	PILRB	MYOM1
MTF2		ZBTB24	MYOM1	CAPN1		RBMS2		NCAPG	MORC1	SHROOM3	AGO1	NUMB	ASTN1	ENPP6	PI4KB	ARRDC4
SGOL2		AATF	MUC13	TP53BP2		MAK16		TRAPPC12	PARP14	KLF4	SPATS2	IL12B	BRINP2	FABP1	METTL22	TBCE
RPL31		PAN2	PPAPDC3	OASL		TMEM60		SGSM2	SMAD2	GRB14	ACAP3	MED13	C1QL2	ARHGEF28	ZNF253	CHORDC1
PTEN		ING3	ARRDC4	SOCS5		ACBD6		RPL15	AGK	ADORA2B	RNF139	CHI3L1	SALL3	IL1RAP	MAVS	ADCK1
PTPN2		LAMP1	TBCE	MAPK10		UBE2I		TUBB2A	BCAT1	AOAH	RPL5	AKR1C1	HTR2C	FAT3	WFDC2	SLC4A8
RPS19		NFX1	CHORDC1	ABCB10		SUMF1		BRK1	GJA1	DYNC2H1	ANKRD16	CXCL6	SBSPON	KHDRBS3	HEPHL1	EFR3A
CCDC59		LRTOMT	MANEA	EPC1		RFC1		TJAP1	PDE1A	SYNPR	CREM	KRT6B	KCND3	PCNX	FAM156A	EPB41L3
SNRPC		RNH1	MSH3	WWP1		LMLN		NINJ2	ACP6	SRGAP2	SSC4D	IL1RN	VIPR2	CPNE4	NPC2	HACE1
NUP214		NCAPD3	MGAT4A	EI24		CUL4A		MAP1S	SPATS1	AGTR1	BAX	S100A2	HHAT	EDN3	SLC16A14	GALC
PPIG		TPP2	ADCK1	CDH5		NPLOC4		AP3M1	RMND5B	CD8A	USP20	WDR31	NKAIN3	TNFAIP8L3	RASSF4	PIAS1
PAK1IP1		TMX1	SLC4A8	PARP16		SEC13		PRC1	APOA2	UCMA	FERMT3	AGR2	KCNH1	CNTNAP2	ANKK1	TCF12
SSBP1		MON1B	EPB41L3	ADAR		TTC32		SMARCE1	TOMM40L	FOLH1	TMEM206	SERPINB8	NELL2	DNAH11	SNORD95	CREG2
GTPBP3		RSU1	HACE1	ANKMY2		RNF185		TMF1	APOC1	KCNRG	CDCP1	CYP2E1	PPP2R2B	GALNT13	SNORD96A	GUCY2C
RTEL1		TSG101	GALC	RRAGC		SDAD1		CUL1	C2orf88	COA4	CLHC1	SH2D3A	ADRA2A	TMEM98	SYT8	CRELD2
USP30		CNOT6	ABCA13	AHI1		MTMR10		PCGF3	DUSP27	MPPED2	ORAOV1	UPK1B	GNAI1	FRMD3	TCN2	USP39
POLR1B		CAMK2D	CDH19	TSPAN13		CHMP3		PRMT6	MYBPH	HIPK3	TMEM242	KRT15	PVRL1	SHANK2	PLA2G2F	FAM71A
ARF4		FDXR	RECK	ZNF207		AP3S2		IL6	GDF3	JAM3	LCP1	KRT5	FGF18	GSG1L	TAB3	VAPB
CCDC174		NUP153	SLCO3A1	MFNG		TUBD1		AMZ1	IFITM5	LTBP1	AIMP2	LAMB3	ZFYVE28	BSN	CLCA2	ABCA13
INTS9		SUPT16H	RYR3	RABAC1		DPY19L4		ZNF318	EXOC3L1	PLEKHA6	CDC34	ARL14	CUX2	ADAM12	PDGFD	THSD7A
PPP1R10		COG1	LRRC17	ZDHHC7		SRRT		ZNF786	REST	C1orf21	USP42	NGF	FBXL7	KCNJ6	ECM2	TPO
BANP		RWDD3	SLC14A2	BCO1		U2SURP		NSMCE2	TUBB3	PIK3C2A	ESD	STX10	LAMA1	ANO5	CSN1S1	RECK
THOC1		MAEA	PCDH9	CROCC		ZBTB40		TTC33	ZNF616	STOX2	MAOA	TMEM105	OLFM1	KCNQ3	CSN2	SLCO3A1
CLASP1		RAB18	EHF	UBL4B		DHX40		SAV1	ADIPOR2	SMARCA5	SERTAD3	RDH16	CACNA1A	EDIL3	OMD	ANO3
TBP		AP3B1	ZBTB43	MMP2		FRA10AC1		CHD1L	STMN2	ATL1	APOO	CXCR5	FAM189A1	PRIMA1	SNORD15B	POSTN
VPS52		MCPH1	CD180	DOCK9		LSM14A		RAB36	HSD17B14	CABP1	DENND4A	ATG16L2	DLGAP2	CWH43	SNORD71	CA6
CNNM2		ZNF655	SH2D4B	PSEN2		CYCS		SPRYD7	CHCHD10	PARP11	TALDO1	WDR89	DMRT1	CSMD3	CCL2	GPR87
CSTF2T		ZCCHC2	SAMD12	HMG20B		ABCF3		AP4S1	CYB5R1	BAHCC1	GABARAPL1	TPBG	GRIP1	FA2H	TRDMT1	RYR3
TXNL4B		TUBGCP3	FHIT	NFAM1		NDUFA7		NUDT8	NOTCH4	BBC3	CHPF2	SLC2A6	KCNIP1	TLL1	HSD17B7	NRG1
NDUFB3		SMARCA4	FOXP1	RNF2		C1orf35		PPIP5K2	CHCHD7	TMEM38A	F3	C4ORF19	GABRB3	COL23A1	IL17RB	UBE2E3
ZNF180		ZCCHC11	TRPS1	TBK1		ADH5		RAD51D	GPA33	LACTB	ST3GAL2	CEBPD	XKR4	MYO16	OSBPL7	LRRC17
CCDC94		ZFAND3	PBX1	ZNF322		C12orf49		SNX2	AEBP2	PTPN22	NR1D1	CCL1	TCERG1L	JAZF1	CEACAM20	CTNNA2
PEF1		FAF1	KLF4	CIT		BRCA2		MRPS33	TCEA3	CAPZA2	PC	DUSP22	ADCY5	PARVA	OLAH	NDST4
UBE4A		VAC14	ADORA2B	KCTD13		CTCF		CDC45	TRH	OTOF	GDI2	PIK3CA	NCS1	DCLK1	ANKRD22	CYYR1
TMEM101		ACBD3	AOAH	METTL13		IMPACT		UFD1L	HPS3	TSPYL4	GTF2E2	GCNT3	NCAM2	GALNT7	PCDH12	DDHD1
TRMT12		COX5B	DYNC2H1	ADNP2		TOMM70A		MRPL46	AGTRAP	DHRS9	ACYP1	NOD2	CADM2	SLC44A5	LALBA	SLC10A2
NUF2		PGM2	ODF1	FAM118A		TPR		MRPS11	SMS	IARS	CBX6	COL1A2	GRID2	ST6GALNAC5	EXPH5	SLC14A2
RBBP5		NABP1	XKR5	ERI3		VPS4B		RAD52	BRWD1	LAMC1	MVP	PLA2G4A	MTUS2	WSCD2	IL34	PKIA
BECN1		CENPN	SRGAP2	LRGUK		ELP2		TGDS	LDHB	ZNF395	MTFP1	TNC	NRXN1	AFAP1L1	PIGR	KCNH8
SDF2		RPL14	AGTR1	AK7		FAM96B		MXI1	TMEM8A	CBX2	PLA2G6	DNAH7	PREX2	FOXK1	LIPK	SLITRK1
CBLL1		MMAB	CD8A	PIEZO1		LYAR		RBL2	FBXO15	CRB2	PSPC1	C2ORF15	PBX3	ZNF787	GLYCAM1	AKAP2
GTPBP10		PSMG4	C1QTNF9	CUBN		SEC61A1		EMC3	ZFP57	SH3BP2	CWC27	KIF26A	PTHLH	PEPD	DHX58	VGLL3
GOSR1		AKAP9	UCMA	AGPAT9		ZNF846		PPIL2	IGFBP2	COL25A1	MRPS18A	SLPI	CLSTN2	SCAP	IL18R1	ZEB1
NUP54		ZFAND5	SLCO4C1	GAS8		NEK1		ALG10	XRN2	FAM160A2	EPHB3	PPIL6	NPAS3	BEGAIN	TMEM173	PHYHIPL
PLAA		PAPOLA	CCDC33	RAB6B		LAMTOR1		E2F7	IFITM2	QRICH2	MAP3K9	CTSS	DYNC1I1	PDGFB	DTNA	UBE2E2
PRPF40A		MAP4K3	OLFML3	MAPK13		TMED2		USP15	ZNF205	MYT1	SLC35E3	SLC31A1	SLC7A14	ITGAM	C1QA	EHF
TNPO2		ASAH2	JAM3	RAB32		TOPBP1		SAMD3	ZSCAN10	SCARB2	SUMO2	CD69	SPSB1	SEC14L2	PZP	SEMA3E
CCDC124		KDM7A	ADORA3	CLCNKB		FARSB		FBXO28	MYBL2	FAHD2A	KIF2A	CXCL3	ARHGAP10	SNX8	PROK1	SETBP1
TPGS1		VRK1	LTBP1	CLU		SNRPE		KIAA1328	RIF1	CCDC126	KIAA0020	PGLYRP1	EPHB1	UBTD2	MLYCD	TMC1
NELFA		CANX	PLEKHA6	SLC36A1		ZC3H13		MED27	PHC1	CFI	FAM26E	TLR9	KCNK9	STK10	MBD5	CDKN2B
PPIL4		CDC42SE2	AP1S3	ATP11B		ZNF266		CD2AP	SOX2	LRP4	SPAG6	HLA-G	SORCS3	BRF1	CRIP3	ZNF365
DHX33		ARHGAP17	COL4A3	TRAK2		HELQ		POT1	SLC2A3	MAPK8IP1	RBM27	B2M	PITPNM3	RCBTB2	LYPLA2	NAV3
PINX1		MLH3	ATP2B4	BPGM		PCNP		TMEM248	IFITM1	HMOX1	RHOA	PSME2	CDH20	FLOT2	C8orf46	GAP43
WDR36		EMC9	S1PR1	NAPEPLD		FARSA		GDAP2	IFITM3	WDR11	TMEM159	RNF31	SHISA6	CMBL	SLC5A12	PPP1CC
RPS5		TMEM59	SLC40A1	ICAM4		ANGEL2		KIAA0556	SPP1	KIZ	ASB8	PSMB9	CDH2	HPCAL1	DPM3	TET1
RPL27		N4BP2	C1orf116	IQCE		NDUFA9		KCNQ5	CD38	MTX2	SRA1	TAP1	DIRAS2	LATS1	MON1A	DPYD
TOMM6		SCPEP1	C1orf21	TPPP		METTL16		CCL7	SLC15A1	LCK	SRXN1	IKZF3	DGKG	PRKAR2B	S100A8	SGCD
SUPT5H		ACOT4	STOX2	ABCG4		NAA15		DEPDC1B	THBS2	MVK	PDDC1	NLRP2	PRR5L	RAB31	ALPK1	VTI1A
ZNHIT3		WDR41	PARP11	CYP27B1		ZNF546		PDGFRB	GPR1	SNAP25	TSPAN3	C11ORF86	NCALD	RMDN2	ZSCAN18	ARSJ
CCAR2		BRAT1	FER	FAM181B		MRPL35		HOMER3	PDGFC	VSTM2L	CR1L	SLFN12	ADCYAP1	SLC35F6	POLR3A	CDH18
RNASEH1		CCNI	GPR39	TSPAN5		GNL3		RAMP1	OTX2	MANSC1	ABCB6	C8ORF37	CBLN4	ROPN1L	C19orf25	FARP1
WDR4		FAM178A	BAHCC1	WNK2		SOD1		ZFAT	ULK1	PPTC7	CCDC53	S100A4	AJAP1	ZSWIM6	C6orf211	MOCS2
DCTPP1		MLF2	BBC3	TGFBR1		MTDH		SDCCAG8	MLLT6	ORC1	CORO7	TTC23L	SKOR2	ANK1	TMEM204	MAP2
LSG1		C18orf25	TMEM38A	PCSK9		PPP6C		IL17RA	MYCN	TNFAIP6	NAPB	ELF3	ESRRB	GPR132		ACKR3
TMEM230		YRDC	LACTB	KCNJ12		SF3B1		HRH2	DPPA3	AKR1D1	SEPHS1	TFF1	GRB10	CD86		CD180
IFT46		RHBDD3	PTPN22	TMEM30B		SUB1		CCR7	NANOG	UGT2B10	ZFAND2B	CSF2	WNT7B	CCL17		SH2D4B
ECD		COA5	CAPZA2	ACVRL1		MRI1		ARHGAP28	MOBP	TMCO4	AKIP1	LGALS1	POU3F1	HNF4A		SAMD12
MED11		PGP	EXOSC9	LGR5		SAC3D1		ICA1	SPIC	CCDC60	DENND4C	HMGCS1	KCNH3	IL16		FBXW7
MRPL10		IPP	TAPBP	RAP1GAP		TMEM168		BMP8A	EPHX2	CPS1	SIPA1	CXCL8	SLC6A5	RYR1		ROBO1
LMAN2		CNOT11	OTOF	ASIC2		NDEL1		KLHL22	SLC5A11	PPEF2	KDELR2	XIAP	GALR1	DHCR24		LPHN2
PEX12		ZER1	TSPYL4	ASTN2		PPP1R8		FNDC8	MGAT3	DPYS	ATXN7L3B	CEACAM1	PRDM13	SCARB1		FHIT
RBM22		ZC3H6	DHRS9	DAB1		BPNT1		TXNDC2	TEX264	VEPH1	PLRG1	SIAH1	NXPH1	ELOF1		FOXP1
EMG1		EXOSC6	IARS	DPP6		MPHOSPH8		PALM	TDH	SOCS5	MAFF	CYFIP1	PRDM14	SKA1		KLF12
NR1H2		UBE2G2	ALDH1B1	LRRN2		ASAH1		CD52	C9orf152	C4ORF32	PI4K2A	CDC42EP5	ADAM11	CTR9		SHROOM3
TNPO3		TUBGCP2	C1ORF116	SATB2		MOB2		UBE2F	WNT8A	SOWAHC	C16orf72	IGHG1	PPARGC1B	GPHN		DNAH5
GEMIN6		WDYHV1	WDR88	MCC		RNF149		UBXN11	ANKRD6	FAM50B	PRC1	DDX26B	LBX2	PTPN14		NYAP2
TRUB1		C11orf58	SLC17A4	KCND3		ABHD5		IGFBP4	CBX7	PHGDH	KIAA1715	CARD14	LOX	EDNRB		KCNC2
GABPA		C20orf24	BANF2	VIPR2		SOAT1		WDR7	GJB3	SH3GL3	NSMCE2	CD59	SLC6A4	TIMP3		KIF5C
IK		43647	MYT1	ADRA2A		MIB1		ETFDH	POU5F1	MAPK10	PPAP2C	CXORF36	TMCC3	SCRT2		ADORA2B
TUT1		ZNF451	MAPKBP1	GNAI1		REEP5		CAPN13	LRRC2	FKTN	GSTM1	FLNA	PTRF	SLC38A3		SRGAP2
RPL24		CTDP1	SACS	ZFYVE28		RELB		S100P	TDGF1	PBXIP1	FUK	SPATA19	CEBPA	RBM17		MPPED2
SF3B5		KLHL18	CCDC126	CACNA1A		AMBRA1		DEGS1	ATP10D	LGALS9	TTC33	BTK	CACNA1G	ACPP		LTBP1
RPL32		NAA38	PHYH	GRIP1		RNF170		ARVCF	DDX58	CIITA	PKD1	SH3BGRL	RXFP3	DSG2		PLEKHA6
DHX8		CDC37L1	QPRT	ZDHHC14		ZNF208		ARHGEF1	STK38	LSP1	COMMD6	C1QTNF6	VASH2	ATP1B3		AP1S3
NME1		NOP2	LRP4	ADAMTS3		NUP98		NDUFS5	HSD17B11	ABCB10	PSMD6	AICDA	ELFN2	STT3B		COL4A3
MRPS23		MRPL57	MVK	CASZ1		DTD1		IL2	LY75	VRK2	MICU1	ARHGEF40	HCN4	DDX59		PIK3C2A
ZNF335		SPTAN1	VSTM2L	ESRRB		TCAIM		NICN1	C1orf106	ARID2	RPS12	CCL23	SOX1	FAR1		STOX2
GSK3A		PITHD1	TMCO4	GRB10		RALGAPA1		CDYL2	FBXO27	DEPTOR	CCDC90B	HBZ	BAI1	GLRX3		ATL1
RPS14		TPRKB	CCDC60	POU3F1		TASP1		SPAG17	HCK	EPC1	LRFN3	CXCL10	VSTM2B	SPATA6		CABP1
ATG12		DDX39B	BPTF	ADAM11		HOMER1		SCYL1	C15orf41	ASUN	LYPLAL1	TCN2	BCAN	DIAPH3		PARP11
CWF19L1		PPP1R15B	CAPN1	PPARGC1B		TYW1		ETAA1	DPPA5	GNG2	ABCB9	ASB9	SH3RF3	GTSF1L		FER
ERCC5		FAM104A	PHGDH	LBX2		TMEM260		PAFAH1B1	ENOPH1	DHRS7	ARHGAP25	GJB1	BHLHA9	IL1RAPL1		GPR39
KDM5A		SLTM	SH3GL3	CRTC3		ASPH		L3MBTL3	HEXB	YBX3	APPL2	NOX1	C11orf87	MYO1B		BAHCC1
CCNT2		UBE3A	CIITA	TMCC3		COPG2		CMC2	C7orf60	ADAR	DTWD1	ORM1	UCN	SLC39A11		BBC3
ZNF143		ABCD3	ABCB10	STK39		IFT81		ARG1	PKD2	ANKMY2	FOPNL	MYOZ1	FAM155B	SLC41A1		TMEM38A
NOP58		RAC1	DEPTOR	NBL1		MRPS17		IDH3G	ZFP42	RAB3GAP2	KIAA0556	CD80	IHH	AGPS		LACTB
RPS27		IDI1	EPC1	HOXC8		RAD54L2		BRAF	CPSF4L	RRAGC	TES	ECM2	IGDCC3	KIDINS220		PTPN22
FBXO38		TXNDC17	RRAGC	CACNA1G		SLC35A1		ZPR1	SYNCRIP	STX2	RC3H1	COLEC10	CDKN1C	TANGO6		CAPZA2
UBXN4		PROSER2	AHI1	CAMK4		KDM1A		CFAP36	DRAM2	AHI1	ALS2	APOBEC3B	HIC1	ATE1		ABHD12
NUP155		RCBTB1	QTRT1	HMX3		ROCK2		PPP4R2	CCDC38	RRS1	ATP5G3	NDP	FOXO6	PDHX		EMC2
ATG16L1		MAP3K4	KIF9	C12orf56		CCDC88A		DSCR8	SLC6A7	QTRT1	CAT	CXCL9	HRK	AKAP7		TRPV3
RPL37		KDM4C	NPEPL1	EFNA3		ULK2		COX11	RERG	UBE2Q1	C16orf58	IL17F	RHBDL3	EHBP1		FAM120A
TPD52L2		MAP7	ADCY9	INSM2		CTNNA3		KHDC3L	USP44	ARAF	ADCY7	CCL2	FOXL1	KTN1		ATN1
DDX28		ZFYVE16	ST3GAL3	LRRC7		RAD18		HOXD1	CAPNS1	KIF9	ARHGDIB	ESCO2	LHFPL3	ETF1		DBNDD1
CBR4		ARFGAP3	PJA2	SYT10		ZRANB3		LHX4	TBL1X	NPEPL1	TESPA1	RSRP1	NRG3	PLAT		BANF2
CCPG1		RING1	ZDHHC7	SLC30A10		COX4I1		KCNA5	TUBB2B	CCNK	CLEC1A	ITGBL1	KY	MTTP		TULP4
PLEKHA1		NR1D2	TAGAP	BACH2		DNAJC25		FAIM	OGT	SQLE	EFCC1	NXT2	BACH2	GLYCTK		MAPKBP1
AP5Z1		AKAP10	POU2F2	SFRP5		EPB41L5		RUNDC3B	PLTP	MYEF2	CREG1	ZNF101	BHLHE22	ADCK3		SCARB2
KAT5		ALDH3A2	POGK	CSGALNACT1		MRPS16		STK31	FOXH1	PDS5B	COMMD9	DMP1	IGFBPL1	MIER1		PGRMC2
MMS19		ESF1	DOCK9	TOX		PHACTR4		NPY1R	GJB4	TSPAN13	TMEM119	IL2RA	EPHA7	TXLNB		KLB
GABPB1		NDUFAF5	PSEN2	LIMCH1		CUL3		TEKT4	GJB5	ZNF207	MYO18B	CCL22	BMP2	EXOC6		SACS
GTF2F2		FKBP8	ERC2	NEBL		ING2		NIPAL1	NANOS3	CHRNA1	SRRM1	C17ORF105	OLIG1	SYNJ1		TMEM217
HPS5		STAG3	HMG20B	OLIG3		ERI1		RBBP8	PPP1R16A	MFNG	B3GNT2	CLDN16	CDH13	DUSP16		KIAA1324
XPNPEP3		RABGGTB	NFAM1	GDF6		SMAP1		ERCC8	RLIM	ADCY9	ZFAT	C15ORF52	NELL1	SPIDR		RAB42
WDR53		CLPTM1L	CIT	SAMD4A		ZNF76		VPS33B	ZNF704	MAP2K5	HHEX	C2	PTPRT	LOC81691		HGF
MRPL16		GDF15	SC5D	CDH22		DNAJB4		MVD	RRN3	ST3GAL3	LAPTM5	MMP1	NEBL	TTC28		AKR1D1
MCM8		FBXW2	FAM118A	CDH4		OAT		PRRT3	C17orf96	PJA2	SDCCAG8	HBE1	CDH8	ANKRD28		CCDC60
RNF40		RPRD1B	ERI3	SDK2		RBM33		BRI3	TCL1A	ZDHHC7	PKIG	CCR5	FAM84A	PMVK		PPEF2
RBX1		SNAPC2	AGPAT9	HS6ST3		AKIRIN1		IFIT5	DNMT3B	PTPN11	AIP	PIGR	DMRTA2	UBE2R2		BPTF
MRPL48		KLHDC3	GAS8	FRAS1		MKLN1		MYF6	SMARCD1	TAF12	ANGPT1	BDKRB2	FLRT2	WSB1		LRP12
NFYC		RITA1	RAB6B	GAB2		GAK		AP1S1	AQP11	VAMP3	PTGS1	IL18R1	UNC5D	ZNF462		TP53BP2
SART1		ACAT1	MAPK13	STXBP6		DYNLL2		COX7A2	PDE4A	DCUN1D4	CD34	TMEM173	UNC5C	ARNTL2		SH3GL3
TRAPPC8		PNPLA8	RAB32	CTDSPL		GTF3C1		MRPL32	UHRF2	IKBKB	LAPTM4B	CD3G	OLIG3	FAM214A		TTC12
GLTSCR2		HNRNPC	CLU	KCNMA1		TFG		ECHDC3	CAMK2B	TAGAP	POR	NQO1	TLX1	LINC01465		MAPK10
TBL3		SLBP	SLC36A1	ST8SIA6		TMEM107		FHL3	SNRPN	POU2F2	BMP8A	SULT1C4	CYP24A1	DMXL2		ACOX1
TMED9		GLOD4	LEO1	LEPR		USP2		IL21R	SNURF	USF2	TMSB4X	CXCR2	HTR7	FBXO21		EI24
UBAC1		NPM1	TRAK2	TBC1D4		RFC3		CNIH4	BCAT2	POGK	ZDHHC19	ZBBX	CDK14	ODC1		DHRS7
MANF		TBC1D17	ZNF217	CPNE7		ARL5C		KCTD21	CST3	SHMT2	RNF216	C11ORF80	KIRREL3	TIPARP		YBX3
PLOD3		FLVCR1	BPGM	GRID1		MRPL39		CYBA	YWHAG	RCOR3	APOL6	TINAG	CHRM3	GLB1		RAB3GAP2
THAP7		SHC1	NAPEPLD	PTGER3		BCDIN3D		STARD3	MOV10	BCO1	IL12A	RMDN1	PTPRM	SCLY		CCNK
ACTR3		UBXN6	FKBP10	KCND2		LSM4		CAMK2A	ELAVL2	CROCC	LRRC49	PSME1	OPCML	RNF122		SQLE
PEX3		MLST8	EIF5	FBN1		SNRNP35		ZNF358	GRSF1	MMP2	DAGLB	ALOX12B	MDGA2	TMEM86A		ADCY9
RBL1		CLPP	CIDEB	MIXL1		MUTYH		GNAZ	LAP3	NCAPH	ITPR2	GRM2	NTRK3	ZNF18		MAP2K5
GSTCD		HYOU1	LTB4R	GRP		POP4		SLC6A8	PDLIM1	TNFRSF18	TTLL1	TPMT	SPON1	CHORDC1		ST3GAL3
YIPF2		FUS	LTB4R2	TPM1		DRG2		MTO1	RDX	DOCK9	OIT3	KLK10	GABRA2	MSH3		PJA2
EIF3D		NOP56	TMEM54	RTN4RL2		POLQ		GOLM1	STK35	PSEN2	RASSF6	C16ORF92	CDH22	BLNK		PTPN11
GTF3C2		CDCA8	DNAJB3	CRHR1		IFIT2		FBXL20	TDRD3	ERC2	COPG1	SPX	CDH4	EML5		BCO1
SASS6		ANKFY1	ICAM4	NPTX1		H1F0		ABCB4	LYRM1	RNF2	LRMP	IGKC	HS6ST3	RAD54B		CROCC
PHB2		PSMC5	ABCC3	SLC32A1		DGCR6		JAM2	TMEM57	TBK1	MTMR14	ERVW-1	PLXNC1	KCTD3		UBL4B
IMMT		GLG1	ANKRD34A	TBX21		ARL2BP		PIK3C3	DIXDC1	ZNF322	IRAK1	C9ORF142	CYP1B1	MYOF		MMP2
AGBL5		MCMBP	KIAA1919	PRDM8		TMCC2		RAB12	CEPT1	CIT	PPDPF	DEFB4A	STXBP6	PTPN3		NCAPH
CKS2		GPN3	NFE2L3	TFAP2D		YIF1B		ABCC10	CASQ2	FAM117B	PRR13	MID2	CTDSPL	FOXJ2		TNFRSF18
SNAPC5		PTCD3	EXTL1	ALX4		CLCN3		SLC6A17	PORCN	RBBP6	ZYX	OPN1SW	KCNMA1	SLC22A15		DOCK9
STK16		DRG1	IFT172	LHX6		TFB2M		MAN2B2	TCEAL8	SREK1	AKR1E2	IFNB1	RYR2	MGAT4A		PSEN2
FAU		SNRNP70	APOA1	DMBX1		ZNF707		JAK3	DPPA4	ST6GALNAC2	LMF1	SELE	CPNE7	PKP2		ERC2
MRPL49		NUP133	TSPAN5	PKP1		MRFAP1		OLFM4	ZNF512	KCTD13	FKBPL	IGHE	GRID1	RAPH1		HMG20B
ZNF830		TBCB	BIN1	BARHL2		UNC45B		GJA10	GALNT1	METTL13	CGRRF1	FCER2	PTGER3	PMP22		NFAM1
ENDOV		ST13	TGFBR1	LMX1B		CD151		GAPT	PPIP5K1	BPGM	CHPT1	CSF3	KCND2	ADCK1		TBK1
MFSD5		AKAP8	PAQR5	FOXD4		TSPAN4		CACNG1	BAK1	KCNAB3	SNX22	PLCD1	GRP	SLC4A8		ZNF322
MTF1		PAICS	RASGEF1C	HOXB4		CIZ1		TMEM132B	ECHDC2	ZNF25	CD274	HAMP	B3GAT2	EFR3A		ADNP2
GIPC1		MCM4	EBF4	HOXC12		MAP2K2		AGTPBP1	MTRF1L	ABHD8	PLEK	FCGBP	RTN4RL2	EPB41L3		FAM118A
USE1		NDC80	STAC2	PAX2		TRIM7		ROPN1	LEFTY1	MRPL34	CTSC	TWIST1	GHSR	HACE1		PIEZO1
RNMTL1		DCTN4	ACVRL1	SOX21		RAB33B		FAM78B	TCF15	FKBP10	PIK3CG	CD209	PAX8	CRELD2		CUBN
TRMT61A		SDHC	LGR5	ZFPM2		CMTR1		FSTL5	DCTN2	LEPREL4	ATP2C1	APOBEC3A	CRHR1	USP39		CLCNKB
AHCYL1		BANF1	ALK	DLL4		PLEKHM3		GLT1D1	KIF5A	EIF5	APIP	IL32	NPTX1	FAM71A		LEO1
ZC3H18		EIF1AD	RAP1GAP	PCDH8		UBR3		SRRM4	DBF4	PANK4	CDKN3	TRIM16L	SLC32A1	VAPB		BPGM
WDR48		ITFG2	ASIC2	FGF5		DNLZ		RIMS2	EFNB3	INSRR	ALDH3A1	C1ORF213	B4GALNT2	ABCA13		SNTA1
BAP1		ATP5L	ASTN2	SOX7		ZSCAN21		ACER1	RCN1	PHPT1	IVD	CCDC107	RPRML	THSD7A		GNE
XRCC1		TSSK6	DAB1	HOXB2		TMEM43		GRIK5	SARS	MZB1	ZGPAT	IL27	DRGX	TPO		SCN2A
C6orf120		SGOL1	DPP6	TBX18		JOSD2		GPX5	CNGA1	CIDEB	G6PD	FCHO1	POU4F3	RECK		AATK
GTF2H5		FKBP3	PAX5	FOXC2		TNFAIP1		ANO2	SLC19A3	LTB4R2	TMEM14A	TLR2	KCNK12	SLCO3A1		ZFYVE21
ZFAND2A		EDC4	LRRN2	CHST2		QTRTD1		PDE7B	MPND	FBXL8	PHF3	PI3	TBX21	ANO3		ZNF25
MUL1		RPL28	SATB2	DIO3		SF3B2		IQCA1	SLC12A9	HSF4	DHX57	SLC5A2	FGF9	POSTN		ABHD8
IFT52		KBTBD3	PRKG1	TMEM132E		CDIPT		LEP	RPAP1	NOL3	GPR161	IFI44L	FOXB2	CA6		MRPL34
RUVBL1		ATP6V1F	GAD1	EN1		DDX41		ATP6V1E2	KIRREL2	TMEM54	SLC7A5P1	CCL11	PPP2R2C	COL6A1		FKBP10
ASF1B		ZFC3H1	SLC6A20	LMX1A		C9orf43		TTC29	GPS1	TRADD	TMEM63A	KRT3	TBX15	RYR3		LEPREL4
RPS21		TCEB1	GRM8	PITX1		DCAF11		MAP1B	RFNG	ICAM4	SIX4	ZNF823	TFAP2D	NRG1		EIF5
RAB2B		ADSL	IRX4	HMGA2		BCL7C		QSOX1	CDX1	FAM228B	APPBP2	ALPK1	LHX8	UBE2E3		INSRR
WRB		ZNF622	SYNDIG1	RNF220		EHMT2		HBQ1	CFC1	IQCE	SCYL1	IL9	BARHL2	ZSWIM2		PHPT1
CHMP1B		TACC3	HHAT	ONECUT3		HBP1		SERPIND1	HES3	TPPP	ETAA1	HLA-B	EBF1	FSHR		MZB1
19906		M6PR	ADRA2A	LHX2		PLEKHB2		ABCD1	LHFPL5	SLC5A1	C11orf30	SLC2A5	FOXD1	ADAM29		CIDEB
RPS3		TOP3A	PVRL1	T		H2AFZ		CCDC167	LY6G6C	TNFRSF13C	SEC63	BDKRB1	FOXG1	LRRTM4		LTB4R
COPS8		PPHLN1	WNT4	HDGFRP3		ILVBL		GPR68	TSPAN17	CBR3	CR2	SELP	PAX7	CNTN3		LTB4R2
ERLIN2		SEC16A	ZFYVE28	ANKRD33B		CCBL2		CD74	NPHS1	APOA1	IZUMO1	TNFRSF4	CDK5R2	TNNI3K		HSF4
ZNF341		ZCRB1	CADM2	HELT		LACTB2		FYB	HYAL3	CYP27B1	L3MBTL3	TP53I3	NEFM	CTNNA2		FAM228B
GOLGA3		BOD1	PREX2	RELN		KANSL1L		SPACA3	PLK3	DUOX2	CUTC	C11ORF54	NR2E1	PAPSS2		IQCE
IDH3B		MAPK7	PTHLH	WNT3		DBT		MYEOV	PLEKHG4	GCGR	C5orf24	HNF1A	PTF1A	DCC		IL27RA
TM9SF4		SUMO1	SYNE2	FZD1		CAMKK2		ARL14EP	ADAM17	TSPAN5	CCDC66	INHBE	FOXB1	DMD		CYP27B1
RPSA		GTF3A	PDZD2	ARHGAP20		KIAA1731		DYNC1H1	GPT2	WNK2	C11orf74		LBX1	MGAT4C		DUOX2
CDCA5		DDX50	THSD7B	CLDN23		PRMT3		RDH13	FYTTD1	RASGEF1C	C8orf4		GSX1	CNTN5		FAM181B
ZFPL1		XPOT	DGKG	GATA5		TRMU		TTYH3	FKBP4	ACOT1	GOLPH3L		ONECUT2	LDB2		BIN1
HNRNPUL2		KIAA1033	PRR5L	NHLH2		RNF34		GUSBP4	ZFHX2	PALM2	ARHGAP5		NEFL	CNTNAP5		TGFBR1
NXF1		RBBP4	AJAP1	CCR9		PSMC6		ZNF33A	FTL	LOC646862	MGMT		DMRT3	NUDT12		NRBP2
LAMTOR5		UBA2	GRB10	TFAP2B		RTCA		TPCN2	ZNF296	NRARP	UHRF1BP1L		EN2	ROBO2		PCSK9
USP48		GGNBP2	ADAM11	COL19A1		FKBP5		PCP4	PVRL2	CALCA	RANBP6		OTP	SUCLG2		KCNJ12
CTU2		ZNF518A	PPARGC1B	OVOL2		FBXO4		EDEM3	TMEM125	ZC3HAV1L	HECA		POU3F2	TLR4		ACOT1
NUDT15		GNAI3	LBX2	RGS20		SCRN3		CLDND1	SNAPC3	APOM	MARCH7		TBX20	CYYR1		PALM2
OGFOD2		RELA	LOX	TRAF4		LONRF1		PNCK	BHLHA15	GPC3	ATL3		ZIC4	TP63		NRARP
TRIAP1		KAT8	CRTC3	SEMA6A		AGPAT1		EOGT	POLE	ADRA1A	PHOSPHO1		LHX5	DDHD1		GPC3
EMC7		C18orf32	SLC6A4	TNRC18		LRIF1		AQP1	RAB3D	AQP3	CFAP36		INSM1	SLC10A2		ADRA1A
MCTS2P		ALKBH5	TMCC3	PAX6		EPT1		GAB4	GPR4	MSC	PPP4R2		IRX2	SLC14A2		SRMS
MRPL55		CNOT3	BAI1	GATA6		ABCA7		EPS8L1	PRDM1	FOXD3	TUBE1		ONECUT1	DTWD2		FOXD3
NDUFV1		ORC6	HIC1	MEIS1		LSM14B		TRIM32	DENND2A	GSC	UBE3D		PAX2	PKIA		GSC
ZNF598		VPS35	RHBDL3	LEF1		IDH1		RAB17	MCUR1	HAS3	IFT27		MSX1	SLITRK6		FZD10
EPRS		CALM3	FOXL1	NTN1		TMEM143		TMEM75	TCEA1	LEFTY2	MAFG		SOX21	TECRL		VGF
MAP1LC3B		SPCS2	EYA4	TENM4		AMDHD2		TP53TG3	NANP	PRMT8	AAK1		PCDH8	TYRP1		CRMP1
UBA52		NFE2L1	NRG3	SMAD6		FERMT2		FANCD2OS	ABHD11	NPTX2	PRRT3		BARX2	B3GAT1		INA
LONP1		PSME3	GNAL	FOXA1		GRK4		ABHD3	TOB1	STAC2	GSTM4		BARX1	KCNH8		RRAGD
PRPF6		SNRPG	PAPPA	GATA4		PEAK1		CNKSR2	CLDN4	ATOH1	KCTD17		HMX1	PCDH9		IGF2BP2
TRMT2A		EIF4G2	KY	FLT1		GSS		GPR12	DSE	DLGAP3	VASN		DLX3	ADAMTS9		EPC2
CCDC101		CDC73	LRRC7	HOXB1		SLC12A6		KCNF1	ARHGEF18	OLFML2A	RNF115		FOXC2	APOB		TMC7
RPL10A		RSF1	SYT10	GRHL2		KIF1B		TANGO2	DHX32	SCRT1	MID1IP1		FEV	BRINP1		FAM86A
RPL26		FAM45A	SLC30A10	GFRA1		ZSWIM8		PTGS2	FCHO2	INA	TMEM44		HOXB8	GRIA2		PMAIP1
TACO1		ANAPC13	BACH2	PODXL		HYAL2		APOLD1	SESTD1	FAM86A	RAB10		NKX2-5	CADPS		CCDC141
RBM42		CAB39L	DACH1	HHIP		CHFR		MATK	SYT14	CCDC141	SLC25A30		POU4F2	LRP1B		LEMD1
RPLP0		ALG14	KCNA2	CITED4		DNAJC10		HTRA3	CHML	LEMD1	LYVE1		SHOX2	TOX3		RGMA
RPS20		DCAF17	SFRP5	CLDN3		FAM83D		SOX14	SLC35F2	RGMA	TGM3		SLIT2	AKAP2		CDH3
HNRNPH3		METTL8	CSGALNACT1	SHE		CDKN2AIPNL		FAM19A2	TMEM245	ZIC5	CYTH3		UNCX	PDE6A		GNAS
KANSL3		FAM210A	CHRM3	TAL1		ZNF790		SLC16A12	DST	GNAS	PTGIR		TMEM132E	PHYHIPL		KCNJ4
RPL29		ABI2	SAMD4A	DLL1		ADO		SNCAIP	PTGFRN	KLF5	SEMA4A		CHST8	UBE2E2		COMMD3
RPS9		TMEM165	MDGA2	GAD2		R3HCC1L		CARTPT	NID2	KLHL21	ASGR1		OVOL1	EHF		TMEM30B
TRIM41		CDADC1	CDH22	GPR124		ADCK5		KLF14	SLC6A15	TRIM44	SERPINB9		HS3ST3B1	CDKN2B		KLF5
TUBB4B		SENP1	CDH4	DUSP4		AKR1A1		RIMBP2	HELZ	CDS1	RASA4		SHC3	ZNF365		KLHL21
NDUFS7		TCF25	SDK2	GADD45G		SEC31A		DAZL	CAST	ADAP2	FGF11		PITX1	GAP43		TRIM44
RPL12		PRRC2A	FRAS1	SOX4		SYMPK		FAM129C	EMP1	CLSTN1	PBX4		TMEM163	PPP1CC		ZFHX3
ACOX3		POLR3K	GAB2	FZD2		AMDHD1		ICK	RAP2B	WNT2B	TMEM55A		LHX2	TET1		ALK
KXD1		CCNT1	PLXNC1	ATF3		ERLIN1		TMEM106B	TBC1D24	ADAMTS16	SURF4		HOXC4	TRDN		CLSTN1
FBXW9		ENY2	STXBP6	UNC5B		TEX30		LHCGR	ITGB3BP	OTUD7A	EEF1A2		WNT1	SGCD		ADAMTS16
POLE3		SPG7	CTDSPL	KIF26B		PPFIA1		RSG1	AVPI1	ASIC2	SLC22A12		FGF20	VTI1A		OTUD7A
VPS72		CDC42EP4	ST8SIA6	DLX4		RAB14		MST1	AOX1	ASTN2	KCNJ15		NKX3-2	CDH10		FAM135B
SPTY2D1		MYLIP	LEPR	FGF3		ELF2		RNF123	CSRP1	DAB1	ZNF746		SOX30	PACRG		ASIC2
KLHL12		CDK13	RYR2	HS3ST3A1		DBI		DHX29	SOX13	DPP6	P4HA1		ANKRD33B	SLC9C1		ASTN2
NARS		VCL	TPM1	MN1		NCKAP1		ERLEC1	CRLF3	ATP2B2	GRHPR		SOBP	CDH18		DAB1
TMUB2		PPP1R12A	CHST15	CCND2		DCAF5		ADAMTS12	PIK3CB	GRIN2A	ARAP2		AVPR1A	FARP1		ATP2B2
ZNF426		RASA1	GHSR	PCDH7		AARS2		COL22A1	PLEKHA2	SLIT1	PCLO		CALN1	MOCS2		GRIN2A
METTL1		WASL	SLC32A1	NR2F2		B3GALTL		KCNAB1	KATNAL1	BMP7	SLC35F3		ST8SIA2	EVA1A		SLIT1
TMEM208		KLHL9	PRDM8	TGFB2		LETMD1		OCA2	SNX10	BTBD11	YIPF5		CBLN2	MAP2		BMP7
DHX36		ZNF592	TBX15	TRIB2		ZNF644		SH3D19	SEMA4B	PAX5	COL8A1		SKOR1	CD180		IGSF21
TRNT1		ZNF22	PKP1	GALNT12		MKI67		CFAP58	SPIRE2	PTPRU	PEX5L		TDRD6	FBXW7		SEZ6
PDCD11		SMPD1	SP8	OSBPL6		SPPL2A		DEFB115	CDKN1B	SATB2	KCNN1		DPP10	AGR3		BTBD11
NRD1		ARPC2	NKX2-2	PLLP		RHOBTB2		GP6	PLIN3	LHX1	MC3R		EPHA5	CDH12		CACHD1
USP16		VDAC1	PAX7	SLC9A2		ST5		GJA5	GIPC2	SCUBE3	IPCEF1		HTR1A	ROBO1		CACNA1E
RMRP		TBC1D7	NEUROG2	HLF		PQLC1		GJA8	PER2	PITX2	MLN		RELN	SLC16A7		PAX5
SWSAP1		NAA30	MSX1	LRP2		GDPD5		POTEA	SLC39A14	SOX17	CATSPER1		CYP26A1	LPHN2		PTPRU
FBXO8		ORC3	ZFPM2	GALNT14		SLC45A3		TCTEX1D1	MFGE8	BRINP3	DIP2A		TWIST2	SPAG16		FOXA2
KATNA1		RARS2	DLL4	WBSCR17		COQ10A		ANXA10	TMEM40	RPRM	C17ORF70		KCTD8	NAALADL2		LRRN2
SEC23B		COMMD4	FGF5	DPF3		PSMG3		CCDC129	C17orf98	YAF2	HERC3		LRFN5	SI		SATB2
OCIAD1		LARS	SOX7	PHLDB1		TXNDC15		SPAM1	GSTT2	GRM8	ZNF410		SHH	GPATCH2		PRKG1
EIF2S3		NUP35	HOXB3	NTRK1		CCNE1		HECW1	ZFP28	IRX4	ELOVL1		SEL1L3	SLC4A3		TMEM132D
TTC14		FANCL	HOXB2	GSC2		EZH2		ACTA2	ZNF7	SYNDIG1	RABL2A		NHLH2	FHIT		SLC6A20
TMEM167A		LARS2	IRS4	WNT3A		H3F3A		FAS	GNL3L	SPOCK3	XCL2		FOXE1	FOXP1		LHX1
EFTUD2		PPP2R2D	FOXF1	HPCAL4		TMEM41B		PPM1F	HELB	TMTC1	SERAC1		TMEM229A	KLF12		SCUBE3
FDXACB1		POMP	CHST2	NEUROD2		DDX24		ESM1	CABLES2	BRINP2	CPPED1		BHLHE23	TENM2		PITX2
DHPS		VTA1	NEUROG1	NMNAT2		MYNN		DZIP1L	LMBR1	SALL3	FAM26D		SIX6	TRPS1		SOX17
DDX21		BCKDHA	TBX4	FUT4		ZNF623		CSPG5	NREP	HTR2C	BRI3BP		RGS20	SHROOM3		RPRM
SF3B4		C2orf49	NPR3	GFI1		C1orf233		ZIC3	KLHL34	SBSPON	SLC48A1		MAFB	PBX1		BRINP2
PSMD7		RPL9	SHC3	SOX8		SLC12A4		TPGS2	PRR19	KCND3	C4orf32		SEMA6A	TRIQK		C1QL2
GTF2H1		NFS1	SCARF2	FGFR3		WBSCR16		ZCCHC6	CD47	VIPR2	ST8SIA4		TNRC18	KLF4		SALL3
ACTL6A		ZFR2	FOXL2	IL15RA		PM20D2		IDS	RBPMS2	HHAT	TRAFD1		ARL4C	LYZL1		HTR2C
NRAS		LARP7	LMX1A	GRIK1		UBE2D1		PHKG1	TJP3	NKAIN3	PPP1R3A		EPHA4	CNTNAP4		HHAT
RPL37A		RBMS2	PITX1	SEZ6L		CBFB		CLDN18	PRDX4	KCNH1	ITGA8		MSX2	DNAH5		NKAIN3
RPS24		SRSF11	RNF220	TMEM56		TMEM192		DSCR10	RNF207	NELL2	FGF23		SALL1	NYAP2		KCNH1
GCN1L1		ZCCHC9	LHX2	PXDC1		CSRP2		PRSS48	DNMT3L	PPP2R2B	POLM		TBX3	ADORA2B		NELL2
JTB		ZNF511	ANKRD33B	ZBTB46		HINT1		NCR1	LPAR6	FGF18	KCNF1		TFAP2C	AGTR1		PPP2R2B
RPL41		HAUS2	HELT	SVEP1		BET1		SMPX	FTSJ2	CUX2	PTGS2		BDNF	CD8A		ADRA2A
ZC3H10		LRRC57	SOBP	CNR1		CCDC91		DSCR4	ACTN3	ADCY5	CXCL5		LEF1	C1QTNF9		GNAI1
NPAT		TUFM	CALN1	ID4		MAP3K11		RNF113B	CRB3	NCS1	VWA5B2		NTN1	FOLH1		PVRL1
PSMA5		ACBD6	RELN	FZD4		TPRN		DUPD1	RNF208	TSPAN12	SLC30A4		TENM4	LINGO1		WNT4
PA2G4		OSBPL8	WNT3	RAB20		LIPT2		TAS2R1	TEX36	NTNG1	TWF1		PRDM16	OLFML3		FGF18
TIMM44		NUP188	FZD1	ARHGAP27		TCTEX1D2		CA10	L2HGDH	CABLES1	PITPNM1		TP73	GAST		ZFYVE28
UBAP1		UBFD1	SSTR1	SEMA3F		PTDSS2		ZNF385D	TMEM37	ZDHHC14	KCNH5		NTRK2	TTC8		LAMA1
PNPO		TSN	CLDN23	GBX1		ZNF519		FLJ16124	AIFM1	NCAM2	KIR3DL2		PODXL	LMCD1		OLFM1
PRRC2C		ARL2	GATA5	WNT6		ZRSR1		AIM1L	PEX13	PBX3	STYK1		GAD2	COA4		CACNA1A
RBM15		CEP78	CCR9	LMO2		ANGPTL6		C10ORF90	CMTM1	PTHLH	MIR181C		SOX4	MPPED2		FAM189A1
ZNF292		IPO9	COL2A1	CHD3		BCAP29		RAB27B	AANAT	HS3ST1	ICK		FZD2	HIPK3		DLGAP2
BOD1L1		RFC1	TFAP2B	FLNC		CHMP6		IL4R	SOX15	SHISA6	INSIG2		RFX4	JAM3		DMRT1
GALK2		HOOK3	TLX2	LARP1B		GPS2		CHODL	SLC44A4	CDH2	SLC35G1		ATF3	ADORA3		GRIP1
TSSC1		MYCBP	BCL11A	TSHZ1		C1orf174		RNF11	SUSD2	LPHN3	ABCA12		PPM1E	LTBP1		KCNIP1
ZFYVE27		WDHD1	CBX8	COL27A1		NDNL2		C21ORF88	ADCY4	PRICKLE1	IL15		BMPER	COL4A3		GABRB3
PSMB1		RAB6A	NFIX	PAQR9		COX6A1		PIWIL1	SDR9C7	DIRAS2	ADAM22		UNC5B	FEZ2		XKR4
SEC22B		GOLT1B	SKIDA1	GALNT6		NHLRC1		TADA1	POLR2D	DGKG	MMADHC		KIF26B	STC1		TCERG1L
FAM96A		RNF4	TRAF4	HLX		C17orf75		SLC25A24	CCR6	PRR5L	NKAIN2		DLX4	TNS4		ADCY5
SNX1		POLDIP2	SEMA6A	MGLL		ZBTB8A		KCNMB1	PLEKHG5	NCALD	KCNAB1		HS3ST3A1	ATP2B4		NCS1
CCBL1		TMEM199	GATA6	NFATC1		APEX1		RSAD2	PXMP2	ESRRB	STXBP5L		SATB1	S1PR1		TSPAN12
MAGOH		VPS26B	MEIS1	EMILIN2		ATP6V1H		PCP2	SLC13A2	GRB10	ANKRD30BL		ZNF536	TPD52L1		NTNG1
PGAP3		SKA3	PLEKHG3	SLC39A8		NOA1		MTHFSD	KLF15	WNT7B	DSC3		MN1	PIK3C2A		CADM2
TRMT1L		TM2D3	LEF1	KIAA1804		MTERF4		PLXNB3	GPR114	POU3F1	ENTHD1		SFRP2	SMARCA5		GRID2
CCDC25		ATP13A1	NTN1	LBH		ARPC4		SLFN5	KRBA1	GALR1	NSG1		SLC24A2	CABP1		PREX2
SMARCAD1		COX7A2L	TENM4	RFTN1		TADA3		TMEM30A	FXYD4	NPR1	HRASLS		CCND2	BBC3		PBX3
COX10		MRPS30	SMAD6	DHH		C16orf90		APCDD1	XKR9	HMX2	MCOLN2		PCDH7	DHRS9		PTHLH
MAP3K7		COMMD2	PRDM16	KCNQ4		ZUFSP		CEBPD	NRTN	PRDM13	SLC4A4		FIGN	EPB41L2		NPAS3
COQ5		PALB2	FLT1	NTNG2		C6orf89		TC2N	RPL7A	NXPH1	ACACB		NR2F1	ALDH1B1		SYNE2
SENP2		POLR2I	HOXB1	GABBR2		COX17		PLA2G4A	ACVR1B	PRDM14	SLC22A16		NR2F2	CAPN9		ADAMTS3
ZFP37		POP7	GRHL2	KCNQ1		C8orf33		TNC	DEF6	PPARGC1B	TBC1D32		FGF12	LAMC1		HS3ST1
FANCD2		MTMR10	HAND1	RPH3AL		AGO1		AMY1B	RAB1A	LOX	RD3		ELFN1	TMPRSS4		DGKI
PRMT5		CARF	GFRA1	BNC1		ZNF821		LOC401296	ARAP1	PPP1R1B	FGL2		SEMA5B	CYP4B1		PPAPDC1A
RAB11A		NUP85	TAL1	VOPP1		ZNF398		LOC401357	UNC13A	PTRF	ADGB		CELF4	RNF165		DYNC1I1
AHSA1		AP3S2	GPR124	DLK1		FBXO34		LOC402715	SNAP29	CARD10	C10orf11		PLXNA4	ECI2		SLC7A14
VIPAS39		GTF3C3	GADD45G	GATA2		TMEM136		PAGE4	MAP2K7	CEBPA	C9orf3		SYT6	PLEKHA8		CASZ1
COX8A		IGHMBP2	ATF3	DUSP2		TRAIP		ERVMER61-1	NAT14	FST	TCFL5		BARHL1	ZNF395		GLIS3
RSL1D1		MRPL21	PPM1E	GPR26		TP53BP1		NBPF4	ZNF471	HIVEP2	PAIP1		RGS17	SIGIRR		SPSB1
KDM4D		DPY19L4	BMPER	SGCB		ABHD13		FLJ40288	ZNF628	NBL1	IDS		SNTB1	VSTM2L		PDZD2
MCTS1		SECISBP2	UNC5B	CD83		PYROXD1		FLJ41170	ASCL2	EFNA3	SYNPO2		CACNB4	ABCA8		THSD7B
NOL6		TBRG4	KIF26B	SIAH2		PIGC		DEFB112	ITPKA	BAI1	DTX4		HOMER2	TMPRSS3		ARHGAP10
CCT2		JRK	HS3ST3A1	RTN4RL1		CNBD2		FLJ45743	SHCBP1L	FAM155B	PSMD4		MEGF11	PRDM9		EPHB1
EIF6		SLC35B1	PRSS12	RASSF10		TNNI3		FLJ46010	FBXO6	CDKN1C	RAB3GAP1		CHAT	ORC1		KCNK9
ELP5		IP6K1	TBX5	GDF10		SLC35B2		GOLGA8G	ETNK2	HIC1	CHAF1B		SPOCK1	TNFAIP6		SORCS3
MED31		U2SURP	SLC24A2	CHRDL2		SLAIN2		HSP90AA2	KCTD15	HRK	EPHX1		GALNT14	FER1L4		PITPNM3
COX18		ZBTB40	MLLT3	SP5		TMEM206		LOC338797	SYT7	ADAMTS19	GSTM2		ECEL1	HGF		CDH20
GGPS1		PHF8	PCDH7	OXTR		SCAF8		LOC401410	GRASP	FOXL1	TMPRSS6		GRIN2C	AKR1D1		SHISA6
PIGF		DHX40	NR2F2	PRR18		TRIM56		LOC642980	TBKBP1	NRG3	TMEM30C		COL4A2	UGT2B10		LPHN3
RCHY1		CRTC2	NRP1	ATP1A3		PRKAR1A		NLRP7	ATG9B	SLC30A10	UNQ6494		COLGALT2	KNG1		DIRAS2
DDX49		CYCS	IRS1	GAS6		NFKB2		RPL7P35	GLP1R	KCNA2	GRPR		FBN2	TMCO4		AJAP1
MMACHC		RWDD1	SEMA5B	FZD3		MED9		GPR34	ESPN	BHLHE22	C1ORF61		FRZB	CCDC60		ESRRB
PRPF31		UBQLN1	RGS7BP	OLFM2		ATF6		DEFB113	HES2	IGFBPL1	UCN3		PKNOX2	CPS1		GRB10
TFPT		DPP7	SIDT1	CNTNAP1		TP53RK		LINC00299	KNDC1	EPHA7	AMOT		NDNF	PPEF2		WNT7B
PCNA		GOLGA1	CELF4	KLHDC8A		LZTR1		C2orf27A	COL5A1	BMP2	MUC20		WNT3A	DPYS		POU3F1
BRMS1L		TMEM203	PLXNA4	SNPH		MAPKAPK5		DIP	DGKZ	OLIG1	C6		COMP	VEPH1		GALR1
CCT6B		MOGS	EGR3	ADM		MRPL9		LOC440570	PPP1R9B	CDH13	CYP39A1		WRAP73	TMEM144		LOX
PSMB5		SYF2	SYT6	FOSL2		THAP1		SLC16A4	CA11	CDH8	CST6		NPNT	BPTF		TMCC3
LTN1		CCDC130	ADCY1	JUN		PFDN6		FBXW12	ETFB	FAM84A	HIST1H2AM		KAZALD1	LRP12		SPHK1
TGOLN2		BCL2L13	FIBCD1	IER5		UROD		FMR1NB	ICAM5	DMRTA2	ASB2		CA4	CAPN1		PPP1R1B
RAD51C		ADH5	SLC43A1	LFNG		MNAT1		C19ORF45	MMP11	FLRT2	ANKRD7		CHRD	TP53BP2		CEBPA
SPCS3		C12orf49	OSBPL6	CACNB2		PPT1		IL17C	NR2C2AP	UNC5D	B3GNT5		CRYBA2	OASL		FST
ACTR6		SAP18	PLLP	SPRY1		RANBP10		LRRC73	NELFB	GDF6	DAPP1		NEUROG3	SOCS5		HIVEP2
SUGT1		TOMM70A	MEGF11	EFNB2		HADHA		RAX2	CACNB1	JPH1	MT2A		NEUROD2	SOWAHC		AQP5
ATP5G2		TPR	FAM163A	PDE4DIP		PPOX		GSTA5	PPP1R14B	CDK14	PAK6		NMNAT2	FAM50B		SCN4B
TMEM11		FAM96B	LRP2	ISLR2		TTC13		GGTLC2	HVCN1	PDE3A	RNF11		ST8SIA3	PHGDH		NBL1
ATP5G1		LYAR	KDR	CHSY1		H1FX		ZNF107	APOE	CHRM3	PRRT1		CBLN1	FBXO47		CRLF1
HEXIM1		EXOSC7	COL12A1	LPGAT1		CDC34		DNAH7	ARHGEF2	SEMA5A	ATG16L2		WNT11	SH3GL3		TMEM59L
NFATC2IP		RBM4B	COL4A2	KIAA1522		USP42		GHRHR	MICAL1	OPCML	TADA1		JPH3	TTC12		LTK
NGDN		ARPC1A	DPF3	TTC7A		DPF2		OVCH1	RASGRP2	PELI2	WDR81		SGPP2	MAPK10		SIM2
PSMA1		TAOK1	TBX1	ADAMTS5		ZNHIT2		PRLH	C1orf112	SAMD4A	TMTC3		ZBTB46	FKTN		HOXB5
GSPT1		TTC19	WNT3A	NTF3		UHRF1		CAMP	SFN	MDGA2	DCUN1D2		CNR1	PBXIP1		HOXB9
ZFP91		DHX30	HPCAL4	TIAM2		CYTH1		CXORF40A	TMEM50A	NTRK3	KNSTRN		ID4	CIITA		HOXC8
TERF2		FAM114A2	IRF2	CXCL12		ITPKC		HSD17B2	COX19	SPON1	IPO13		PROK2	VRK2		C1QL3
USP28		FARSB	CA4	HES5		TOP2B		B3GNT3	LEMD2	DUSP26	PPP1R12B		FZD4	ACOX1		NKX3-1
DNAJB12		SPTLC1	PITX3	VSX1		REL		TNFRSF1A	CSTB	GRM7	HAPLN1		HTR6	PARP16		CACNA1G
ZSCAN22		SNRPE	NEUROD2	CPED1		CHPF2		C5ORF30	AIRE	NOL4	ECM1		ST8SIA5	ASUN		KCNK4
PDE6D		ZC3H13	NMNAT2	CD244		F3		F9	S100A14	IRX6	SPINK2		SSTR4	GNG2		PARP12
CALCOCO1		MPV17	MMP15	PKDCC		ITGAV		OGFRL1	MTNR1A	GABRA2	LOC642236		LYPD1	DHRS7		SOWAHB
SMUG1		TRMT6	WNT11	KCNG3		SPECC1		N6AMT1	RND2	ZNF804A	CCL1		TACSTD2	YBX3		CAMK4
CDK8		ZNF761	JPH3	IRAK3		PLEKHA7		PHF14	GLI1	SDK2	HEPH		GBX1	ADAR		NPR2
WNK1		LSM5	SLC9A5	MYO5B		GDI2		MAP1LC3C	NFATC4	GRID1	DENND5A		PAQR9	ANKMY2		CASKIN1
SAFB2		MAP4K1	FGFR3	PTPRS		PGM1		NCOR1P1	PAFAH1B3	KCND2	DUSP22		HLX	RAB3GAP2		HMX3
WDR59		PIK3R4	IL15RA	SLC41A2		UAP1		C14ORF159	TRIM46	FBN1	PIK3CA		LBH	RRAGC		EFNA3
CLK3		COG4	GRIK1	MAF		VPS37C		TNFRSF11B	DDAH2	MIXL1	COL1A2		RTN4R	STX2		ELFN2
RSBN1		POLR2G	TMEM56	PTH2R		LNX2		TMEM257	TCF19	GRP	PLA2G4A		BNC1	AHI1		KIAA1549L
FBXO33		NSRP1	HPSE	SEMA3D		ZBTB25		NLRP2	CYP4F3	TPM1	TNC		VOPP1	RRS1		HCN4
CNOT4		MYSM1	PXDC1	SFMBT2		VPS37D		HTR1E	KLF8	ADCY8	DEFB113		WNT9A	ARAF		SOX1
SNRPA		GPATCH3	SVEP1	CAPN2		ADPRHL1		RGS18	INPPL1	B3GAT2	LINC00299		DLK1	KIF9		BAI1
FTO		PACRGL	GBX1	MAMLD1		SLC25A19		NMRK2	LRRC42	CHST15	MIR548AD		GATA2	NPEPL1		VSTM2B
NMT1		ZNF266	LMO2	HR		TNK2		WFS1	SCN2B	HOXD4	SIGLEC17P		DUSP2	CCNK		BCAN
DYNC1I2		OSGEPL1	COL27A1	GJA3		OLR1		C5ORF15	PPFIA3	IGF2	PI15		GPR26	ADCY9		SH3RF3
CCP110		PCNP	PAQR9	EMID1		FNTB		PRG2	MMP17	ALX3	SLPI		SGCB	MAP2K5		IHH
BUB1B		COPB2	GALNT6	P4HA2		GABPB2		C4ORF36	SELV	RTN4RL2	C7ORF65		ADRA2C	ST3GAL3		CDKN1C
BUB3		DDX27	HLX	ARFGEF1		PSPC1		C7ORF25	IRGQ	GHSR	LOC441666		NPAS1	PTPN11		HIC1
PRPF19		FARSA	MGLL	CAV2		RRP15		PRKD3	ZBTB7B	PAX8	LOC284837		SIAH2	TAF12		HRK
TIAL1		NDUFA9	NFATC1	NKD2		SAAL1		COA1	EVPL	NPTX1	OSCAR		RASSF10	DCUN1D4		SOWAHA
AP2S1		METTL16	EMILIN2	DCBLD1		LRRC29		KCNV2	MMP14	SLC32A1	LILRB4		OCLN	TAGAP		ADAMTS19
GTF2H4		NAA15	SLC39A8	KIAA1147		CCNG1		IDI2-AS1	CYP2S1	B4GALNT2	TNFRSF1A		PPM1L	DOCK9		FOXL1
TIMM22		GRWD1	KIAA1804	EDARADD		SYNPO2L		WDR64	HDC	RPRML	CES1		TRIM9	PSEN2		EYA4
DDX23		ZNF546	LBH	FBP1		KIAA0895L		SLC30A8	STRA8	DRGX	SZT2		BACE2	ERC2		LHFPL3
PPRC1		CYB5D2	RFTN1	METTL24		KIF2A		C2ORF48	TM4SF5	POU4F3	C5ORF30		PTH1R	TBK1		NRG3
AFTPH		DDX1	TNFAIP2	SLC13A3		NVL		NADK2	KLHL2	ALX4	PDC		NETO1	CIT		GNAL
COPS7A		CETN3	DHH	FAM98A		CCDC88C		C1ORF198	MND1	LHX6	NR2C2		CHRNA5	DEPDC1		PAPPA
UBR4		DCAF10	KCNQ4	KCNJ2		KIAA0020		ANGPTL1	SLC25A27	LHX8	LAYN		ATP1A3	GXYLT1		KY
FAM179B		HDAC2	NTNG2	HDAC7		CENPU		C15ORF32	STARD6	EMX1	C5orf30		GAS6	RPAP3		LRRC7
ZBTB11		HNRNPA2B1	EVA1C	MOCOS		FAM26E		CXORF23	IGFALS	LHX9	SMCO1		BCL11B	RBBP6		BACH2
KIAA0391		WARS2	TRIM47	TEC		ABHD16A		ABHD12B	KCNK5	BARHL2	TNFRSF11B		CECR6	SREK1		DACH1
ZNF222		MTDH	GABBR2	FAM131A		ATG4B		HECW2	ASB16	IRX1	RAB33A		GP5	ADNP2		KCNA2
ZNF230		ROCK1	GLIS1	IL13		AKAP8L		CNBD1	RIPK3	SP8	C16ORF72		KCTD12	LRGUK		SFRP5
ZNF589		MYO6	RTN4R	PCDHGC4		PIF1		CCNB3	CX3CL1	EBF1	RNF213		LYSMD2	AK7		CSGALNACT1
RNASEH2C		UBE2K	KCNQ1	PEG10		TMEM159		NXPE4	GPR139	LMX1B	PYGB		B3GNT6	PIEZO1		BHLHE22
ZNF17		PPP6C	RPH3AL	FZD9		NPPB		IFIT1B	SPINT1	EBF3	HABP2		KLHDC8A	CUBN		EPHA7
ZNF224		RAB1B	VOPP1	NPBWR1		CCDC103		NBPF10	KLK1	GSX1	NR1I2		BMP1	GAS8		BMP2
ZNF225		ZNF438	DLK1	TRPA1		SAMD10		APEH	SLC28A3	ONECUT2	COA1		LPAR3	RAB6B		OLIG1
N4BP2L2		MOB2	GATA2	TSPAN18		IL4I1		PRNT	NNAT	VWC2	SERPINA12		APLN	MAPK13		CDH13
UBR1		VPS37A	LRRC8C	PNMA2		MCM7		NME6	NEK7	EOMES	EPS8L3		SNPH	RAB32		NELL1
CCDC28A		ZDHHC20	CD83	GABRG3		SRA1		NPRL3	PQLC3	HOXD13	ZBTB8B		ADM	CLCNKB		PTPRT
ZNF277		LRRC58	FHDC1	EDN2		BRK1		GRM6	S1PR3	SIX2	IL1R2		RGMB	CLU		LIMCH1
PSMB6		RNF170	SIAH2	RNF217		NCSTN		AKAP4	CADM4	SIX3	LINC00589		PDE4DIP	SLC36A1		CDH8
VEZT		NCK1	RASSF10	TRIM67		CHURC1		ZNF474	HSPA12A	NKX2-1	TCEANC		CPEB2	ATP11B		FAM84A
ZNF26		ZNF208	PPM1L	IRF8		DSN1		FAM124A	PTCH2	OSR2	GSTM3		LPGAT1	LEO1		DMRTA2
EXO1		ARGLU1	TRIM9	MICALL2		SYNJ2BP		ZNF532	PLEK2	RAX	PFDN1		DFNB31	TRAK2		FLRT2
RPS13		DDX20	OXTR	CD248		NUCB1		C21ORF91	LYRM7	ZIC2	MIR200C		GALNT9	ZNF217		UNC5D
MTR		PDIA3	CNTNAP1	ZNF521		OXLD1		DCT	GAR1	DMRT3	CX3CR1		SYT2	NAPEPLD		MAB21L1
HRSP12		TCAIM	CNPPD1	ABHD6		TUBGCP5		OR4A47	PPP1R11	EN2	MED29		TSC22D3	SNTA1		OLIG3
CWC25		TASP1	GP1BB	ERBB2		FBL		OR4C3	ACO2	EBF2	ZBTB48		NAV1	GNE		TLX1
RBM8A		ASPH	ADRB1	RTKN		SRXN1		FAM221A	PHF5A	OTP	IFIT3		PDLIM4	LGMN		GDF6
ISY1		RBM6	PLEKHO1	FAM212B		SNAPIN		STK17A	KIAA1143	POU3F2	ARHGAP23		LMO4	MZB1		JPH1
HINT3		KDM1A	ADM	ACHE		DTYMK		ADAM30	KIF15	ZIC1	HSP90B3P		LRRC4	SPOCK2		CYP24A1
METTL14		WAPAL	FOSL2	CCRL2		TATDN1		GZMA	HMGB2	FEZF2	NETO2		LRRN1	NOL3		HTR7
ERGIC2		ULK2	IER5	ST3GAL6		ZNF524		HAO2	UTP3	ZIC4	NTS		SEMA6D	TMEM54		CDK14
GOSR2		CTNNA3	CACNB2	TMOD1		C2orf44		CCDC185	ABT1	PHOX2B	GVINP1		MC4R	TRADD		PDE3A
XAB2		DNAJC25	SPRY1	ACSS1		DEF8		HBZ	CCT3	LHX5	SLC35C2		TMEM108	CHST3		CHRM3
RPL34		CAPN7	FRAT1	USP25		CTSA		TMEM130	MTMR4	EVX1	SPRY3		HES5	CLMP		SEMA5A
UQCRFS1		DDX6	RGS10	DUSP8		NEURL2		IMPDH1	PRPF4	INSM1	SPATA19		FAM69C	FMNL2		PTPRM
AACS		SSX2IP	PDE4DIP	RSPO4		VPS51		NLE1	RPL23	MSX1	KCTD11		PKDCC	SOCS7		OPCML
GPATCH2L		POLD3	PHF13	FADS3		THTPA		ZNF337	CLPTM1	WNT5A	C19ORF60		KCNG3	ZNF827		PELI2
POFUT2		CUL3	POU2F3	RCSD1		FAM133B		LGSN	RBM3	SIM1	RBMY1A1		ATP11A	IL27RA		SAMD4A
KCTD20		HOOK1	DRAM1	SPNS2		ZNF382		ZNF138	STK11IP	ZFPM2	ALDH1A1		ELAVL3	SLC35G2		MDGA2
BIRC5		PPP2R5E	CHSY1	IL6R		FAM72A		PHF6	TMEM33	FGF5	SCML4		DPYSL5	DUOXA1		NTRK3
PPM1B		CABYR	ITPKB	SOCS1		C11orf73		TMEM200A	ATG5	FOXF2	C20orf196		PRKAR1B	EXTL1		SPON1
CHST12		PNRC2	GALNT9	TMEM229B		ZNF780A		GPR82	PIGM	HOXB3	TMEM174		PGBD5	GCKR		NOL4
TRRAP		AGGF1	SYT2	ZSWIM5		MPV17L		C2orf66	RIOK1	HOXB2	COLEC10		DNAI1	ABCG4		CDH22
KIF21B		GSTO2	KIAA1522	TMEM158		AP3M1		OR5K2	GRPEL2	IRS4	HFE		GAREM	CBR3		CDH4
NFYB		EIF3H	TIAM2	ZNF354B		CUL1		PLAC4	TMCO1	SIX1	PHC3		MAPT	ABHD15		SDK2
AGO2		NOL10	UGT1A1	EGR2		PCGF3		OR5H2	ADAT2	WT1	IKBKG		GPR157	MFSD4		CYP1B1
TUBA4A		PPID	ARHGAP31	CDKL1		SLC4A7		OR5K4	STX16	HAND2	CD247		GPSM2	EPHA6		KCNMA1
ASB1		TXNL1	HES5	SPTB		SH3BGR		DCAF4L2	NCBP2	FOXD2	PLN		COL13A1	FAM181B		LEPR
ITSN1		ERI1	VSX1	CTPS1		CREBRF		REG1B	NOL9	ISL2	ALG10B		TTBK1	WNK2		TBC1D4
CTDSP2		SMAP1	EPHX3	PTPRB		TMEM120A		REG3A	SSR2	NKX6-1	VTRNA1-2		DENND5B	BIN1		GRID1
FZD5		YTHDC1	SCUBE2	MEX3B		CPT1C		JAKMIP2	CIRBP	TMEFF2	GBA		MYO5B	TGFBR1		PTGER3
BOLA3		ANAPC4	CD244	ASB3		KCTD18		COLEC10	CCNL1	BARX1	CLCN1		PTPRS	PCSK9		KCND2
GPX4		ZNF76	EGLN1	TRPC4		DNPEP		OR2B3	GNB2L1	HMX1	HSD17B7		SLC2A13	KCNJ12		FBN1
AGAP3		WDR19	KCNG3	FFAR3		MDP1		OR5K1	MTF2	DLX3	CLCA3P		ALCAM	PALM2		MIXL1
CCNF		FBXO42	S1PR5	ITGA7		TMEM106C		USP26	SGOL2	FOXC2	ULBP2		CADM1	FOXD3		GRP
CMTM6		OAT	TNFSF9	NOD1		RUVBL2		NDP	RPL31	TLX3	EXPH5		CDH6	HAS3		TPM1
SNF8		SARAF	ATP11A	RHOBTB1		BAZ1A		OR4C13	PTEN	FEV	GLYCAM1		SLITRK5	LEFTY2		ADCY8
OBFC1		VPS18	ELAVL3	GSDMC		TMED5		FSHB	RPS19	HOXB8	CASC2		LRRTM3	PRMT8		B3GAT2
AARS		DPH6	DPYSL5	ZNF703		PYCARD		OR5K3	TMEM167B	NKX2-5	CCL8		NEUROD1	DLGAP3		CHST15
ATF4		IRAK1BP1	PRKAR1B	FNBP1		SPATA33		NXPE2	GARS	POU4F2	CLECL1		NDUFB4	INA		ZNF467
C7orf55		LMTK2	PGBD5	LONRF2		TELO2		OR4A5	SNIP1	SHOX2	CD3G		TTC39C	IGF2BP2		HOXD4
CLK4		YTHDC2	GAREM	SPARC		HCN3		DGKK	PAK1IP1	SLIT2	FBXO43		STC2	EPC2		IGF2
PCBP1		RBM33	DNAJA4	MCF2L		CERS5		GREM2	SSBP1	C9orf172	YAE1D1		MRAS	TMC7		ALX3
CD164		TMEM170B	MYO5B	LAMA4		LRFN4		TRAM1L1	GTPBP3	CDX2	NQO1		ADCYAP1R1	FAM86A		VAX2
PPP2R1A		TNKS2	PTPRS	MME		ACAD8		CCL2	RTEL1	NKX2-8	PTCD1		RBPJL	PMAIP1		GHSR
SON		ATP13A3	MAF	PDYN		CENPJ		ALG10B	USP30	DBX1	OSGIN1		TMEM151A	RGMA		PAX8
R3HDM1		DNTTIP1	MECOM	PLA2G5		PGM2L1		DCAF16	ARF4	UNCX	MLYCD		ERBB2IP	CDH3		CRHR1
FEM1A		ZC3H4	NEUROD1	DNAJC6		BSCL2		ZNF267	PPP1R10	HOXD9	PCDH20		SHISA2	ZIC5		NPTX1
ZFYVE1		BDP1	CAPN2	SLC37A1		ZNRD1		SLFN11	BANP	HOXC11	CLLU1OS		RTN1	GPRC5B		RPRML
ABCC5		LCLAT1	DKK1	MDM1		VKORC1		ZNF37A	THOC1	CHST2	LOC389033		C14orf39	NOTUM		POU4F3
C12orf57		MIEF1	DACT2	GOT2		CREBL2		GPR89A	MRPL1	DIO3	MIR622		UBE2J1	GNAS		FGF9
OPA3		TSC1	KIF1A	ACCSL		UBE2L6		SLC35G6	PDSS1	TMEM132E	ACTR3BP2		P4HA2	TMEM30B		PRDM8
AHCYL2		KLHL11	EMID1	EFHB		GATS		ZNF425	TBP	NEUROG1	BSN-AS2		FLT4	TRIM44		FOXB2
SERBP1		POLB	TMEM151A	SLC9A8		NMRAL1		ZNF280A	VPS52	NPR3	C12ORF45		HMGN3	ZFHX3		PPP2R2C
HMG20A		TAF1D	RTN1	RMND5B		ANXA7		PRAME	CIPC	EN1	C10ORF105		GNAO1	PTPN13		TBX15
SRSF1		PAXBP1	UBE2J1	IFITM5		NRM		WDR3	SNRPD3	NRN1	SFTA1P		SLC25A21	ACVRL1		TFAP2D
AKT1S1		RC3H2	P4HA2	TMEM253		CSRP2BP		LOC284009	PEF1	CHST8	TINAG		TACR1	ALK		ALX4
HNRNPA1		GTF3C1	ARFGEF1	REST		SUCLA2		SRPK3	UBE4A	HS3ST3B1	ELTD1		SLC13A3	ADAP2		LHX6
ZCWPW1		SMIM7	CAV2	EVC2		AP4S1		TFDP3	DPAGT1	CNIH3	CSF3		CNNM4	CLSTN1		DMBX1
TARBP2		TFG	COL15A1	PP2D1		OXSM		RGS21	SLX4IP	FOXQ1	PLCD1		PLD5	WNT2B		LHX8
PTMA		PSMD3	CASP7	NOTCH4		TAF7		CAPS	NUF2	LMX1A	LOC729970		PKIB	HS3ST2		PKP1
UBB		THEGL	NRAP	GPA33		ZNF226		ZNF311	RBBP5	PITX1	TWIST1		PRKD1	ADAMTS16		HOXA2
PPM1A		TMTC4	TMEM181	IFITM2		NFXL1		KHDC1	SUPT6H	HOXC10	PPIEL		EIF4G3	OTUD7A		EMX1
HNRNPL		UBA6	ATP8B1	ZSCAN10		UQCRH		DEFB110	CBLL1	TBX2	LOC63930		PTN	FAM135B		LHX9
SP1		GK5	FBLN7	MYBL2		SCNM1		MRGPRD	DHX33	HOXC13	NOP14-AS1		CPE	ASIC2		KCNK13
COPS5		SMCHD1	GATM	SLC2A3		DDX19A		KIF2B	PINX1	PAX1	CBWD2		FAM98A	ASTN2		BARHL2
HNRNPUL1		AP4E1	EDARADD	SPP1		EIF3F		CDC20B	WDR36	HOXA7	RGS4		ESRP1	DAB1		IRX1
KAT7		RFC3	SLC25A21	MOBP		TMEM41A		L3MBTL4	PDE12	DLK2	PPP1R37		MMP16	DPP6		SP8
EIF4A1		TCHP	GDPD1	EPHX2		SF3B6		GAGE1	RPS5	FOXE3	APOBEC3H		GDPD1	ATP2B2		EBF1
MRPS18B		PRDM2	RNF219	MGAT3		CNOT1		SHROOM4	RPL27	WNT1	DPY19L1P1		MARCKS	GRIN2A		FOXD1
FNBP4		KIF14	MOCOS	TDH		GTF2B		CERS1	TOMM6	HOXD12	FTX		TRIM36	IGSF21		LMX1B
NAT10		MRPL39	PLCL2	LRRC2		UQCRC2		GDF1	ZNHIT3	ANKRD33B	GYG2P1		CELF6	BTBD11		EBF3
RPL3		ATG2B	TEC	LY75		MXI1		FAM27L	WDR4	HELT	LINC00273		CDPF1	CACHD1		FOXG1
RPL13A		NAA16	IL13	C7orf60		RBL2		REG1A	TMEM230	LRRTM1	LINC00284		POU4F1	CACNA1E		NKX2-2
RPS11		COPB1	PEG10	PKD2		PAFAH2		PAGE1	IFT46	CDH11	LOC100132891		PCDHGA10	PAX5		PAX7
AP2M1		KIF13B	TRPA1	UBA3		EMC3		DEFB116	ECD	GFRA2	LOC100506274		PCDHGA5	PTPRU		CDK5R2
PHF12		BCDIN3D	TSPAN18	ARSA		JMJD4		CHRFAM7A	MRPL13	SKOR1	LOC400958		KIAA1024	FOXA2		NEFM
ZNF384		LSM4	GPM6B	CPSF4L		LTA4H		ANKRD30B	MED11	TDRD6	LOC554206		GPM6B	SLC16A9		NR2E1
DARS2		SNRNP35	GABRG3	FGR		HIRIP3		LOC401052	MRPL10	DMRT2	MEIS3P1		KCNK10	LRRN2		PTF1A
CSDE1		TMEM39B	MPPED1	TBL1X		E2F7		BMP15	LMAN2	GDNF	MIR3134		KIAA1239	SATB2		FOXB1
CENPO		POP4	RNF217	GSTA4		USP15		NUDT10	PEX12	VGLL2	MIR3689F		PNMA2	PRKG1		LBX1
TBC1D10B		VAMP1	TRIM67	OGT		KIAA1328		PCDH20	RBM22	FLT3	MIR4422		SLC6A2	TMEM132D		GSX1
ZNF585A		DRG2	MICALL2	PLTP		NEDD1		CPO	DDX39A	KCNA1	MIR4483		DLEU7	GAD1		ONECUT2
MED6		MAGOHB	PODNL1	PPP1R16A		C14orf166		DAOA	KLHL20	SHH	MIR4669		PCDH17	LHX1		NEFL
PRKCSH		POLQ	RASSF2	SESN2		SEC24C		CTAGE1	ZNF335	CLDN23	MIR4708		ZNF423	SCUBE3		DLX1
RPLP2		STOML2	PLA2G16	WIPI2		POT1		AZU1	ZNF408	GATA5	MIR4734		SLC9A7	PITX2		VWC2
PPP1R7		C1orf74	ABCC8	CEPT1		APPL2		AMY1C	RPS14	NHLH2	RBM14-RBM4		BSX	SOX17		EOMES
SPAG7		C20orf27	CD248	CERKL		DTWD1		RANBP3L	RPS26	VSX2	ST13P4		KIAA1045	BRINP3		HOXD11
ATAT1		FXR2	ZNF521	G6PC2		FOPNL		TEX35	NUP107	FGF8	TMSB15B		KLHL29	IL20RA		HOXD13
MORF4L1		RMND5A	ABHD6	BAK1		ATP6V0E1		TPMT	ZNF143	SIX6	C3orf80		SOD3	GRM1		SIX2
CASC5		HTATSF1	NAB1	TAF8		KIAA0556		KLK10	NOP58	MFSD2A	FLJ42969		EDN2	YAF2		SIX3
RANGAP1		GLCCI1	KCNK3	PTGER2		UHRF1BP1		FCGR1B	FBXO38	SOX18	MIR3178		SPATA18	GRM8		NKX2-1
POLG		MOSPD3	CD302	MTRF1L		TES		EDNRA	UBXN4	BMI1	HCG22		DGCR14	IRX4		OSR2
SP2		RRAGA	UPB1	LEFTY1		PDP2		PXDN	RPL37	CAV1	PLAC8L1		NEFH	MCC		RAX
CXXC1		BYSL	FAM212B	TCF15		RAB2A		XKR3	NDUFB7	FOXP2	IGLL5		DRD2	SYNDIG1		ZIC2
NBR1		MED20	ACHE	CLIP3		RC3H1		CATSPERB	AP5Z1	BOC	LOC100507501		LINGO2	SPOCK3		DMRT3
NOLC1		H1F0	CCRL2	PPIC		STK11		HBM	MMS19	COL19A1	MIR365A		MPPED1	TMTC1		EN2
PRCC		KIAA0513	ST3GAL6	DCTN2		GPR146		HBA2	GABPB1	PDX1	MUC3		SLC6A11	ZFHX4		EBF2
CAND1		TRMT44	TMOD1	KIF5A		HLA-DMA		HBA1	GTF2F2	RGS20	MPEG1		SYNDIG1L	BRINP2		OTP
VCPIP1		AGO3	ACSS1	TAF4		COLQ		KRT222	RAD51AP1	PROX1	OR9A4		SUSD4	SALL3		POU3F2
ING4		ARL2BP	USP25	ARL6IP5		SPTA1		FCHO1	HPS5	CD24	TTC36		TRIM67	HTR2C		ZIC1
SART3		DLEU2	AKT1	PHTF2		VAMP8		CLCN5	XPNPEP3	BCL11A	C2orf80		LY6H	SBSPON		TBX20
RPS16		VPS9D1	DUSP8	TFPI		P2RX7		DEK	WDR53	CBX8	TUBA3E		RASSF2	KCND3		FEZF2
KIAA0907		ZNF276	FGD5	ARHGEF19		POPDC2		OR11H1	KBTBD4	NFIX	EGFEM1P		OSMR	VIPR2		ZIC4
RPA2		TMCC2	RSPO4	MAPK4		ASIC4		OR4C12	MRPL16	NRP2	KCNV1		ZNF521	HHAT		PHOX2B
TIMM9		TPRG1L	RXRG	CLDN5		B9D2		OR2W1	EDRF1	SKIDA1	C12orf29		KCNK3	NKAIN3		FOXD4
COA7		CLCN3	FADS3	PALMD		UBA7		TAS2R3	NFYC	TRAF4	WDR91		GNG4	KCNH1		PAX9
PER1		SLC39A13	RCSD1	TSPAN17		C1orf52		CCL11	TRAPPC8	SEMA6A	KIAA2026		AKT1	NELL2		HOXB4
TMEM109		ZNF707	IL6R	RNF182		CREG1		MED30	MANF	TNRC18	PTGR1		DUSP8	PPP2R2B		HOXC12
MEF2D		EXOC2	SOCS1	ACSBG2		RNF166		ULK4P2	PLOD3	ARL4C			IL6R	PVRL1		HOXB6
TFRC		PDSS2	ESYT3	GPT2		TMEM119		FCAR	PFDN2	EPHA4			TMEM229B	WNT4		LHX5
AMD1		S1PR4	SLC10A4	CHAC1		ALPK3		HYAL4	THAP7	NR4A2			B4GALT4	CUX2		NKX2-3
NUFIP2		CEP70	CPD	PLCXD1		GGCT		FAM182A	ACTR3	TLE1			ZSWIM5	FBXL7		MNX1
ARIH1		MRPS6	SLC8A3	POLE		ZFAT		LOC389199	PEX3	SALL1			DOCK3	LAMA1		OLIG2
SETD5		TSEN2	IGFBP6	PRDM1		FKBP1A		SND1-IT1	IMMT	TBX3			KCNG4	OLFM1		EVX1
CSNK1A1		MIF4GD	ALOX12	FAM188A		SMAD5		CTHRC1	AGBL5	TFAP2A			STK32C	CACNA1A		NEUROG2
ASXL1		TMEM251	CDKL1	EXTL2		UBXN2A			CKS2	TFAP2C			SRF	FAM189A1		INSM1
ZFR		TSPAN4	SPTB	SLC30A7		PIGL			MRPL49	BDNF			STAT5B	DLGAP2		OTX1
PCIF1		NPM3	HSPB3	NSUN3		TMEM135			GIPC1	PAX6			SLC8A3	DMRT1		IRX2
ILF3		AUH	CTPS1	RGS9		PLEKHA4			USE1	GATA6			DNM1	GRIP1		ONECUT1
RIC8B		FGD6	PTPRB	CLDN4		RASAL1			RNMTL1	MEIS1			FGFR4	KCNIP1		PAX2
INTS6		RAB33B	MEX3B	DSE		STK25			TRMT61A	PLEKHG3			PPL	GABRB3		MSX1
SRRM2		LRIG2	PTPRE	EPS8		NSMCE1			AHCYL1	LEF1			CTPS1	XKR4		WNT5A
HSPA4		FRG1	ASB3	ARHGEF18		PKD2L2			TTLL4	NTN1			MEX3B	NTNG1		SOX21
RBM39		OPA1	TRPC4	DHX32		ATAD5			WDR48	TENM4			MEDAG	CABLES1		SIM1
VPS25		CDK3	PAPD7	ANKRD1		UROS			BAP1	SMAD6			PTPRR	ZDHHC14		ZFPM2
SMARCD2		CMTR1	ZNF703	DHRS3		CHEK2			GTF2H5	FOXA1			ASB3	NCAM2		DLL4
AP2B1		PLEKHM3	MTMR3	EDN1		INO80C			MRPS2	GATA4			ERP29	NRXN1		PCDH8
TMEM39A		LRP6	FNBP1	LIMA1		NINJ1			ZFAND2A	SOX9			PAPD7	NPAS3		FGF5
TMEM131		B3GALT6	LONRF2	DST		PAQR7			DDOST	PRDM16			NOD1	SYNE2		SOX7
ATG7		C1orf131	MAP10	PTGFRN		SLC43A3			PIP5K1C	TP73			PEX2	ADAMTS3		FOXF2
PTPLB		GNPAT	37226	EMP1		CALHM2			CHMP1B	HOXB1			C8orf34	LSAMP		HOXB3
RFC4		DDHD2	KCNMB2	TM4SF1		CLIC1			1954-07-01	GRHL2			POMGNT2	SLC35F1		IRS4
TNKS		LUC7L2	DNAJC6	CUL2		CISH			COPS8	HAND1			MTMR3	DGKI		GSX2
NUCKS1		MMAA	PIPOX	ADAMTS6		RAC2			KTI12	NTRK2			PRKAR2A	DYNC1I1		HOXB13
SKA2		XPO6	PIRT	AMFR		TRAPPC2L			RPSA	PODXL			EIF4E3	SLC7A14		SIX1
ZSWIM1		NSUN2	SLC46A3	TBC1D24		COPG1			CDCA5	BMP4			FSD1L	CASZ1		DLX5
EEF2		POGLUT1	MDM1	ZNF202		NOMO1			NXF1	HHIP			MRS2	GLIS3		WT1
SRSF2		TRIP13	TMEM51	CSRP1		UBE2F			EPRS	DLL1			PDYN	SPSB1		HAND2
GTF3C4		UBE3B	SLC9A9	HEG1		PXYLP1			MAP1LC3B	GAD2			KCNMB2	PDZD2		FOXD2
MGEA5		FNBP1L	TMEM154	CDKN1B		AKR1B10			UBA52	GPR124			DNAJC6	THSD7B		FOXF1
LNPEP		RICTOR	OPRD1	PLIN3		CCDC63			NCL	DUSP4			PIPOX	ARHGAP10		ISL2
PELP1		NMT2	PREP	SLMAP		COX7A1			TRMT2A	FZD2			HOPX	KCNK9		BARX2
RRM1		ZSCAN21	WWC2	CABLES2		BAZ2A			TACO1	ATF3			SPATA24	SORCS3		IRX3
HDLBP		SUGP1	TPK1	LMBR1		POLR3GL			RPS20	PPM1E			TMEM51	CDH2		NKX6-1
KDM3A		ANKS1A	GRAMD1A	ABCA6		CAD			HNRNPH3	UNC5B			SLC9A9	LPHN3		TMEFF2
GANAB		KLHDC4	EFHB	MED12		PLSCR2			SUMF2	KIF26B			TMEM154	PRICKLE1		OSR1
KPNA3		CENPT	GABRG1	OR2C1		CGRRF1			RPS9	DLX4			ABCC12	DIRAS2		TBX18
PPP6R3		NCLN	SCHIP1	ZNF182		SEPT8			TRIM41	FGF3			SNX16	DGKG		BARX1
P4HB		FUZ	ADRB3	CCDC158		IGFBP4			TUBB4B	EMX2			JAKMIP1	PRR5L		HMX1
SENP3		MAU2	SRGAP3	DEFB1		STARD10			LRSAM1	HS3ST3A1			CPZ	NCALD		DLX3
ACTR1B		COPS7B	PARP14	KNCN		USP4			NDUFS7	PRSS12			NDRG4	ADCYAP1		FOXC2
LRCH4		HEMK1	AGK	DYDC2		DNTT			RPL12	SATB1			NRSN1	CBLN4		TLX3
ZNF687		BAD	DENND1A	CRYGC		MED10			SPTY2D1	ARX			G2E3	AJAP1		FEV
HNRNPDL		EIF2B4	GOT1	GOLT1A		FILIP1			BUD31	ISL1			WSB2	SKOR2		NKX2-5
BIRC6		MAF1	APOC1	DPEP3		CD274			ZNF426	RSPO3			RNF32	ESRRB		POU4F2
CSE1L		SHARPIN	APOBEC1	DGKQ		ARID5A			EEF1B2	TCF21			IGF2BP1	GRB10		SHOX2
NTMT1		NUTF2	GDF3	NHSL1		DEGS1			EXOSC5	TSHZ3			FOXP4	WNT7B		SLIT2
RNF44		SSNA1	BCL2A1	CRB3		PLEKHB1			METTL1	ZNF536			SLC10A7	POU3F1		C9orf172
HINFP		CTNS	IFITM5	CCT8L2		ISOC1			NRD1	MN1			TPK1	NXPH1		CDX2
SLC25A1		TMEM147	EXOC3L1	BEST3		NUMA1			USP16	SFRP2			GOT2	PRDM14		NKX2-8
SELK		DHODH	REST	NKAIN1		PHF3			GFM2	ATOH8			GRAMD1A	ADAM11		DBX1
TSEN34		UBN1	TUBB3	MBIP		TMEM63A			TTC14	MLLT3			ACCSL	PPARGC1B		UNCX
UBE2B		FAM64A	ZNF616	MPP4		ARHGEF1			NSA2	CCND2			EFHB	CRTC3		DNAJC22
USP1		TSSC4	ADIPOR2	HLA-E		NICN1			STAT2	PCDH7			ACTRT2	PTRF		HOXD10
ZBTB37		RECQL	ATCAY	THSD1		ETAA1			CLNS1A	FIGN			ELAVL4	CARD10		HOXD9
DDX42		HBP1	SLC17A9	AQP9		L3MBTL3			MARS	NR2F1			MTCL1	CEBPA		HOXC11
HMGCR		WDR6	HSD17B14	VWA5A		CUTC			NOP16	NR2F2			GABRG1	PDE3B		PRDM6
THRAP3		GTF2E1	PP2D1	IQSEC2		CCNJ			FDXACB1	ENPP1			OR5V1	STK39		CHST2
UBAP2		REXO2	TCEA3	SERPING1		AP1B1			MIS12	FGFR2			HNF4G	LTK		DIO3
EIF3B		UBE2S	TRH	GBP2		ARHGAP5			SERINC1	IRS1			SCHIP1	NR5A1		TMEM132E
WRNIP1		COPRS	AGTRAP	SLC15A2		SPDYA			MTBP	TGFB2			ADRB3	HOXB9		NEUROG1
RHEB		SWAP70	SMS	TACR3		ARG1			COG8	BHLHE41			SRGAP3	HOXC8		TBX4
SRSF6		EID1	LDHB	NYAP1		ZRANB1			DHPS	CXCR4			MORC1	CAMK4		NPR3
MGRN1		CEP55	SLC2A3	SLC44A4		C10orf118			NIP7	HAS2			NR5A2	NPR2		EN1
MYBL1		ANKRD12	IFITM3	SDR9C7		UHRF1BP1L			DDX21	PCDH10			PARP14	HCN4		NRN1
NDC1		PRMT3	CD38	ACVR1B		JPH2			GTF2H1	CDKN2C			ACVR2A	SOX1		CHST8
ZNF219		THUMPD2	MGAT3	DEF6		C9orf72			MFAP3	ELOVL4			SMAD2	KLHL14		OVOL1
PHB		TRMU	TDH	RAB1A		ALKBH3			SERP1	GABRA5			BCAT1	SH3RF3		HS3ST3B1
FNIP1		DDX11	ANKRD6	ARAP1		RANBP6			STX12	GPR176			FUT9	IGDCC3		SHC3
NOP14		MDH2	B4GALT6	UNC13A		HECA			TMEM234	ELFN1			GJA1	ADAMTS19		CNIH3
SCAF11		ZNF397	IQCK	TMEM88		GCC1			NRAS	SEMA5B			PDE1A	FOXL1		SCARF2
SSR1		INIP	PLSCR1	WDR74		PFN2			NCOA3	TRIB2			RALGPS2	EYA4		FOXL2
SLC25A33		NT5M	CAPNS1	ZNF628		COQ10B			ATF7IP	GAS1			FAM110B	LHFPL3		FOXQ1
RIOK2		RALGAPB	TBL1X	SHKBP1		STARD5			RPL41	SHC4			SLC9A8	NRG3		LMX1A
PITPNB		ALDH2	TUBB2B	SH3BGRL3		CYBRD1			PA2G4	HOXA13			MPP6	PAPPA		PITX1
RQCD1		ILKAP	GSTA4	CNN2		MTHFD2L			UBAP1	SIDT1			SS18	KY		RASGRF1
CFDP1		LRR1	PLTP	NTN3		ZNF32			TSEN54	CELF4			GJC1	LRRC7		TMEM163
PSAT1		PCMTD2	ZNF704	FBXO6		VPS33B			MTMR9	PLXNA4			KCNN2	SYT10		HMGA2
PWP1		MAPK8	PDE4A	RHBDF1		RNF187			CDK5RAP1	SYT6			SPATS1	SLC30A10		RNF220
TMEM231		PEX7	MOV10	MLXIPL		SORD			MAN2C1	HEY2			RMND5B	BACH2		HOXC10
RRP1B		STXBP3	PDLIM1	ATG9B		SLC26A6			MED4	IGFBP5			APOBEC1	DACH1		ONECUT3
CALR		RAB24	CERKL	CHRM4		SETD8			TRIP4	SLC43A1			IFITM5	KCNA2		IRX5
RAD23A		ARCN1	G6PC2	GLP1R		KHK			FAM98B	PLLP			TMEM253	SFRP5		ZNF503
CNBP		PRPF3	BAK1	ESPN		RNASEK			FAM96A	CACNB4			EXOC3L1	CSGALNACT1		LHX2
COX5A		CHIC2	MTRF1L	HES2		FAM195A			SNX1	HOMER2			REST	TOX		EVX2
PPIA		METTL6	TFDP1	KNDC1		RSAD1			NOSIP	CHSY3			TUBB3	BHLHE22		TBX2
KDM5B		MBTPS1	PHTF2	COL5A1		GAA			ACOT8	FJX1			ZNF616	IGFBPL1		HOXC13
VCP		BBS2	CDCA3	SYNC		MGARP			METTL18	GALNT14			CFP	EPHA7		PAX1
DNAJB1		WDR82	PECAM1	DGKZ		CYP17A1			CCBL1	KDR			GCK	OLIG1		C3orf70
HERPUD1		MRPL15	SIGLEC8	PPP1R9B		VASN			ATP5J2	SMOC2			STMN2	CDH13		FAM211B
G3BP1		EPS8L2	METTL15	ETFB		LTBP4			SZRD1	ADORA1			AEBP2	NELL1		NKX1-2
PPP2CA		MEA1	SLC12A9	ICAM5		SGSH			METTL3	NEGR1			TCEA3	PTPRT		HOXA11
ADAT1		SLC16A6	RPAP1	APOE		OPN3			NOL12	COL4A2			HPS3	LIMCH1		ESX1
KIF2C		IDH1	NAPRT	HAP1		THEM4			RPS15	COLGALT2			SMS	NEBL		HOXA7
RACGAP1		TMEM143	RNF182	RASGRP2		USP47			BUD13	HTRA1			ZSCAN10	CDH8		FOXC1
BRCA1		ALAS1	GEMIN7	COX19		RAB10			MRPL38	MB21D1			THBS2	FAM84A		HOXA10
HEXIM2		GGA3	PVRL2	LRRC42		GEN1			CASP6	LRRN4			GPR1	DMRTA2		HOXC6
TTC1		MTRR	RAB3D	CCDC173		OCIAD2			ZNF664	WRAP73			PDGFC	FLRT2		HOXA5
GTPBP4		SH3YL1	FAM188A	PPFIA3		IGSF9B			ZNF688	NPNT			ULK1	UNC5D		HOXC5
CDK5RAP3		INO80	SLC30A7	HPS1		TOM1L2			RPS23	PTGER4			PURA	UNC5C		HOXA4
MLEC		FEM1B	ARHGEF18	ERCC1		FECH			TOR2A	NEUROD2			MYCN	OLIG3		HOXC9
NDUFB6		TXN	DHX32	ZBTB4		TRIM55			CHCHD2	ST8SIA3			ENPP3	TLX1		HOXA6
SH2B1		PCYT1A	TCF20	HDC		TMEM25			RPL22L1	ADAMTS8			NXPH3	GDF6		HOXA9
AP2A1		TFAM	ANKRD1	STARD6		LTA			ZNF175	RGS9BP			C17orf67	JPH1		FOXE3
NFYA		SS18L1	DHRS3	CEP85L		PTGIR			STXBP2	CBLN1			DPPA3	HTR7		WNT1
IMPA2		MCHR1	CCDC6	ACTBL2		TNF			RPS3A	CCDC177			NANOG	CDK14		HDGFRP3
RFX1		MEF2C	TBC1D24	MID1		MYBPC3			SWT1	CPEB1			MOBP	KIRREL3		HOXD12
ARHGAP39		PHYHIP	SOX13	SNX19		ANKRD52			TCTA	SYNM			SPIC	PDE3A		SLC35D3
ZBTB7A		ADI1	CRLF3	NEK7		PIGX			TRMT1L	B4GALNT1			EPHX2	CHRM3		NKX3-2
CRK		GRK4	PIK3CB	S1PR3		PLEKHM1			CCDC25	WNT11			NR0B1	SEMA5A		SP9
ATP9B		FAM115A	PLEKHA2	CELF3		CORO1B			SMARCAD1	FUT4			SLC5A11	PTPRM		SOX30
ARF6		FMN1	KATNAL1	WNK4		ZFP82			COQ5	GFI1			MGAT3	OPCML		ANKRD33B
PHF20		HDAC5	SNX10	CYP26B1		MEX3A			ANAPC5	JPH3			TEX264	PELI2		HELT
RAB5A		RAB43	SEMA4B	RUNX1T1		PELI3			PCNA	SOX8			TDH	SAMD4A		SOBP
LYRM5		RPL18A	PLIN2	KCNN4		ATP5S			RAD51C	SLC9A5			STK38	MDGA2		AVPR1A
SOD2		TMEM127	MOB3C	PLEK2		ACAA2			ACTR6	HCRTR1			HCK	NTRK3		LRRTM1
TOM1		SMAD4	PLAGL1	GZMM		BCL7A			HEXIM1	PTPRZ1			NKAIN4	DUSP26		CALN1
HSPA5		APLF	TMEM40	MRGPRE		TYMS			CALCOCO1	TMEM56			B4GALT6	GRM7		ST8SIA2
RBM18		KLHL26	NGFRAP1	INHA		MCCC1			KLHL28	PXDC1			PDPN	NOL4		CBLN2
TRIM26		TRAPPC6B	SLMAP	SCRN2		FANCA			DYNC1I2	PROK2			FAM13C	GALNT3		CDH11
GMNN		ZSWIM8	CEP170B	GAR1		GINS1			CCP110	WNT6			TMEFF1	IRX6		GFRA2
OGDH		HIST2H4A	MED12	PHF5A		NLRX1			AP2S1	WNT10A			DRAM2	GABRA2		BMP6
OSBPL11		HIST1H3E	DND1	FASTKD2		TMEM55A			CCDC28A	CHD3			CAPNS1	ZNF804A		SKOR1
DAZAP2		GRB7	PDZK1	HMGB2		INTS8			SUOX	FLNC			PLTP	CDH22		TDRD6
MAP4		MZT1	TMEM139	UTP3		OGG1			HINT3	LARP1B			GJB5	CDH4		CORIN
MRPL4		ACN9	DEFB1	EPM2AIP1		CEP97			ZRANB2	TSHZ1			RLIM	SDK2		DPP10
TICRR		CDKN2AIPNL	KNCN	RNF6		PARD6A			AACS	COL27A1			ZNF704	HS6ST3		EPHA5
KIF18A		TGS1	DYDC2	CCT8		MAN2B2			POFUT2	PAQR9			AKTIP	FRAS1		HTR1A
SETX		ZNF790	PLEKHA3	RPL23		EEF1A2			ITPR3	GALNT6			C17orf96	GAB2		RELN
TCERG1		ATP5O	CD47	FAM32A		SPRED3			KCTD20	HLX			TCL1A	PLXNC1		WNT3
HNRNPR		BICD2	CTSF	PIGM		SUV420H1			BIRC5	MGLL			SMARCD1	CYP1B1		CYP26A1
IPO7		DFFB	INMT	RIOK1		PPP1R13L			PPM1B	NFATC1			AQP11	STXBP6		TWIST2
RPE		POMT2	PTK7	TMCO1		SYN2			CHST12	SLC39A8			CAMK2B	CTDSPL		DMRT2
DDX17		ADO	CRP	DCP1A		EXTL3			TRRAP	RFTN1			TAC4	KCNMA1		VAX1
IDH3A		PTPN23	CD200R1	CCNL1		LPPR1			KIF21B	TRIM47			FBXL5	ST8SIA6		GDNF
XRCC6		TMEM214	GBP5	MTF2		COX6A2			NFYB	BNC1			SNRPN	LEPR		VGLL2
NCBP1		ZNF169	ACTN3	SNRPC		LRTM2			AGO2	VOPP1			SNURF	RYR2		KCNA1
PROSC		TIMMDC1	CRB3	CCDC174		ANKRD40			ANXA11	GATA2			YWHAG	TBC1D4		FZD1
SPAG4		SEC31A	TEX36	INTS9		ORMDL1			KRCC1	GPR26			MOV10	GRID1		KCTD8
RPN2		NRDE2	CYB5RL	BANP		MAN2A2			LUZP1	SGCB			RBBP7	KCND2		MKX
TVP23B		ARL5A	KLHL32	CLASP1		RILP			TMEM123	NPAS1			SESN2	FBN1		LRFN5
ANKRD27		ERLIN1	SPC24	MRPL1		AVL9			MAP3K6	ARSB			ELAVL2	GRP		SHH
JAK1		KIF3B	LY6G6D	PDSS1		DGCR2			TUBA4A	SIAH2			RDX	TPM1		SSTR1
MSH2		KREMEN1	LY6G6E	TBP		TEAD3			ASB1	LTBP2			STK35	ADCY8		SEL1L3
TNRC6C		SPG11	TMEM140	VPS52		ABCA3			ITSN1	RTN4RL1			TDRD3	SLC32A1		SOX3
ABLIM2		CEP250	DSC1	CIPC		CCDC15			CRIP2	PFDN4			GLUD1	DRGX		DKK2
EPS15		LETMD1	NKAIN1	CNNM2		KLHL17			FZD5	PPM1L			PATL1	POU4F3		CLDN23
SND1		IDH2	DYNC1LI1	ZNF180		ZMYM4			BOLA3	CHRDL2			LYPLA1	KCNK12		GATA5
PTPN4		MICU2	PPP2R3A	CCDC94		NRBP1			GPX4	ATP1A3			WIPI2	TBX21		NHLH2
VAPA		GPR107	SP110	SNRPD3		CHMP4B			AGAP3	PRKCDBP			IL17RD	FGF9		COL2A1
ADNP		ORC5	AQP9	TMEM101		SIRT4			CCNF	FZD3			CASQ2	PRDM8		TFAP2B
CRKL		WARS	VWA5A	TRMT12		TDRD7			AP3D1	OLFM2			PORCN	FOXB2		FOXE1
CLPB		25020	ACSBG1	TNPO2		ARHGAP33			CMTM6	ADAMTS1			OR2H2	PPP2R2C		FGF16
HBS1L		TMED4	FOXJ1	NELFA		KANK2			SNF8	TIGD5			TCEAL8	TBX15		GREM1
GPBP1		ATRIP	ADCY4	DHX33		PLEKHG2			OBFC1	CNTNAP1			DPPA2	TFAP2D		PLK5
TRPM7		EBI3	SDR9C7	PINX1		ALG2			RBFA	NAT8L			PCSK1N	ALX4		GDF7
ABHD2		LZIC	PLEKHG5	WDR36		SCRG1			AARS	TNXB			KRTAP13-1	DMBX1		VSX2
FN1		NMNAT1	GPR114	DDX39A		CPPED1			ANKRD37	BCL11B			GALNT1	LHX8		RGL3
IRF2BPL		FASTKD3	NRTN	TUT1		ATP6V0E2			WDR34	CNPPD1			PPIP5K1	PKP1		TLX2
PAWR		PSMG3	ACVR1B	SUPT4H1		C1orf216			ATF4	GP5			MTRF1L	EMX1		SLC30A3
MAX		TXNDC15	WDR74	RBM28		NDUFA12			EAPP	C1orf115			CLIP3	LHX9		WNT16
SPRED1		EZH2	ZNF628	NOP58		UBIAD1			ASXL2	NPHS2			DCTN2	BARHL2		ASCL1
UBL3		TMEM41B	NTN3	RPS27		C10orf32			ATP6V0D1	FAM78A			KIF5A	SP8		FGF8
RAI14		PWP2	MLXIPL	UBXN4		GTPBP8			GPBP1L1	RASL10A			TAF4	EBF1		POU3F3
SLC25A36		TRAPPC10	ATG9B	NDUFB7		SIGMAR1			SYNGR1	GP1BB			TFDP1	FOXD1		BHLHE23
AMOTL2		C1orf109	CHRM4	CHCHD5		EXO5			C7orf55	CDKN2A			EFNB3	LMX1B		SIX6
SKAP2		SMNDC1	GLP1R	SCAND1		PDCD5			CLK4	BAI2			SIGLEC8	EBF3		MFSD2A
CTGF		KIAA1524	ESPN	CCPG1		BRI3BP			PCBP1	INSL3			UFM1	FOXG1		SOX18
SRC		ARMC6	HES2	TIMM10		SLC48A1			CD164	PHOX2A			SEPSECS	NKX2-2		BMI1
SULF2		CEBPG	KNDC1	AP5Z1		TRAFD1			PIKFYVE	KCNK6			G0S2	PAX7		MAFA
SALL4		WDR45B	COL5A1	KAT5		LRRC10			PPP2R1A	WNT10B			TCF7	CDK5R2		CAV1
SLC6A6		APOA1BP	SYNC	GABPB1		PPP1R3A			SON	KCTD12			C20orf96	NEFM		FOXP2
CTBP2		KNOP1	DGKZ	HPS5		KIAA0226L			CCDC77	LYSMD2			RFNG	NR2E1		HOXA3
MYO18A		NSF	PPP1R9B	UBAC1		RFESD			PPP2R3C	BMP1			HES3	PTF1A		LIPG
SEC14L1		SMPD3	ICAM5	PEX3		RBM43			FEM1A	ADM			LHFPL5	FOXB1		OVOL2
FSCN1		FAM204A	APOE	BMS1		TMEM74B			ZFYVE1	FOSL2			LY6G6C	LBX1		PDX1
JARID2		OTUB1	ARHGEF2	GIN1		SNX33			ABCC5	JUN			TSPAN17	GSX1		ADRA1D
KLF2		C6orf203	FRS3	CDC123		TMOD2			C12orf57	CACNB2			NPHS1	ONECUT2		CCBE1
KLF9		CSNK2A2	TRIM46	NUDT5		KLHL23			OPA3	SPRY1			ACSBG2	NEFL		PROX1
SOCS3		RUFY1	NLGN3	SMIM12		KIAA1644			SRSF1	FRAT1			ZFHX2	VWC2		CD24
CIC		KIAA0195	PPFIA3	IMMT		NRIP3			AKT1S1	RGS10			FTL	EOMES		MAFB
KDM6B		SMYD5	HPS1	KDM8		COL4A4			HNRNPA1	RGMB			PVRL2	HOXD13		BCL11A
MIDN		MBLAC2	CYHR1	RUVBL1		TRABD2B			ZCWPW1	ZNF436			C21orf91	SIX2		CBX8
JUP		RPS2	IRGQ	GOLGA3		SNCAIP			CAPRIN1	ESRP2			PCGF6	SIX3		NFIX
BCL2L11		CD37	ZBTB7B	USP48		AP5B1			PTMA	PHLDA2			POLE	OSR2		NRP2
FOXO3		E2F4	EVPL	PRPF6		GEM			UBB	GPRC5C			RAB3D	RAX		SKIDA1
DUSP6		TRIM35	MMP14	CCDC101		SNRK			COX20	DFNB31			BTN2A2	EN2		TRAF4
MAP2K3		SURF6	ERCC1	RPL10A		OPRL1			PPM1A	GALNT9			PELO	EBF2		SEMA6A
TPM4		PM20D2	SPINT1	HNRNPH3		PDE5A			HNRNPL	TSC22D3			CIDEA	OTP		TNRC18
ID3		ITFG3	ACTBL2	SUMF2		CDK20			SP1	NAV1			TRIM31	POU3F2		EPHA4
CYR61		LPCAT1	MID1	RPL29		JMJD8			COPS5	NR4A3			GPR4	ZIC1		MSX2
ZNF367		MTERF3	SLC28A3	RPS9		MMADHC			HNRNPUL1	TIMP2			PRDM1	TBX20		NR4A2
CDKN1A		TMEM5	HSPA12A	ACOX3		NKAIN2			KAT7	TTC7A			STRA6	FEZF2		TLE1
KANK1		ITFG1	WNK4	PSMD7		HRASLS			EIF4A1	IFFO2			DENND2A	FOXD4		TFAP2A
CITED2		TMEM192	LIF	RPS24		SLC4A4			MPDU1	MPP2			PANK3	PAX9		BDNF
UBC		NPHP4	RUNX1T1	RBM15		PWWP2A			MRPS18B	ADAMTS5			ZNF706	HOXB4		PAX6
DDIT4		BET1	KCNN4	ZNF292		KIRREL			NAT10	LRRN1			RHPN2	HOXC12		GATA6
ZMYND8		EXD1	PLEK2	LRRC27		NEO1			RPL3	MRC2			SLC31A2	HOXB6		MEIS1
HES1		CAMLG	KISS1R	DDX18		ACTA2			RPL13A	NTF3			GTF2H2	LHX5		PLEKHG3
ID1		C10orf76	PTP4A3	CDK5RAP1		MYOM2			RPS11	CXCL12			NANP	NKX2-3		LEF1
RBPJ		C17orf75	INHA	SLC35B4		DNAJB5			AP2M1	HS3ST5			NSUN3	OLIG2		NTN1
TLE3		PRELID1	SCRN2	CCBL1		GATAD2B			PHF12	LPL			RGS9	ONECUT1		TENM4
PIM1		ATP6V1H	RPRD2	PGAP3		HMBOX1			ZNF384	ARHGAP31			TOB1	PAX2		SMAD6
SMAD7		MRPS5	EPM2AIP1	CHCHD2		ZCCHC6			CENPL	VSX1			EPS8	MSX1		FOXA1
SPRED2		NDUFS1	FAM32A	HIST1H4E		C16orf52			DARS2	ADAMTS7			RPIA	WNT5A		GATA4
EPHA2		DPH3	PIGM	SWT1		MARCH2			CSDE1	FAM69C			ARHGEF18	SOX21		SOX9
EZR		OXNAD1	TRMT1	SENP2		MYLK3			TBC1D10B	SCUBE2			DHX32	SIM1		PRDM16
MAFK		FBXO45	ARF4	RAB11A		WDR73			ZNF585A	LOXL1			FCHO2	ZFPM2		TP73
GSE1		NDUFB5	CCDC174	GGPS1		FUCA2			PRKCSH	DAAM2			SESTD1	GSX2		FLT1
ID2		ARPC4	PPP1R10	BRMS1L		TMEM176A			RPLP2	THPO			SYT14	HOXB13		HOXB1
RHOB		C16orf90	BANP	CCT6B		TMEM176B			PPP1R7	PENK			TCF20	SIX1		GRHL2
MTSS1		FBXL12	THOC1	RAD51C		ANKDD1B			SPAG7	SLITRK3			CHML	DLX5		HAND1
NT5C2		ZUFSP	CLASP1	SPCS3		MAP2K4			ATAT1	ELAVL3			DNAJC18	WT1		GFRA1
ZFP36L2		YWHAB	MRPL1	PSMA1		C9orf3			MORF4L1	DPYSL5			ANKRD1	HAND2		NTRK2
AKAP1		TMEM136	CIPC	DNAJB12		PI4K2B			RANGAP1	PRKAR1B			DHRS3	FOXD2		PODXL
XBP1		SMC3	NSL1	CALCOCO1		ARL1			POLG	PGBD5			EDN1	FOXF1		GBX2
PTP4A1		MYL6	CNNM2	CLK3		PSMD4			C2CD5	DNAI1			PTGFRN	ISL2		TAL1
TSC22D1		ASCC1	SNRPD3	CNOT4		ATRAID			CXXC1	IRAK3			HELZ	IRX3		DLL1
WEE1		ZMIZ2	TMEM101	AP2S1		C11orf84			NBR1	GAREM			CAST	NKX6-1		GAD2
BMF		PYROXD1	SLX4IP	GTF2H4		PTPN21			NOLC1	MAPT			TM4SF1	TMEFF2		CXXC4
DIDO1		RINT1	RBBP5	DDX23		SPECC1L			PRCC	GPSM2			TNFRSF8	OSR1		NES
RHOF		CDC16	TNPO2	KBTBD7		LDHC			VCPIP1	COL13A1			ACAA1	BARX1		TRIL
SLC20A1		PIGC	PINX1	UBR4		CPOX			TIMM9	TTBK1			ACTR3B	HMX1		NKX6-2
FAM91A1		NARFL	LSG1	XAB2		GPNMB			LACE1	DENND5B			ZNF281	DLX3		SOX11
H2AFX		CNBD2	EMG1	GPATCH2L		RARB			PRR14	ITGB4			MPP5	FOXC2		DUSP4
BTG2		DOPEY1	TUT1	ITPR3		PSCA			DSCR3	MYO5B			YAP1	TLX3		GADD45G
SCD5		THAP6	SF3B5	KCTD20		EDAR			RPL38	TDRD1			CSRP1	FEV		FZD2
AGPAT4		EAF1	RPL32	CHST12		FAM57A			HNRNPD	PDZRN3			PIK3CB	HOXB8		RFX4
IER5L		VAMP4	MRPS23	TRRAP		SLC2A6			TMEM109	SLC41A2			SPIRE2	NKX2-5		LATS2
ZC3H11A		SLC35B2	ZNF335	KIF21B		GUCY1A3			ALDH7A1	ALCAM			CDKN1B	POU4F2		ATF3
RAB7A		TUSC3	SUPT4H1	NFYB		HSPB7			MEF2D	MECOM			MFGE8	SLIT2		PPM1E
RAB30		MCOLN1	ZNF143	AGO2		WTIP			POU2F1	SEMA3A			MOB3C	DNAJC22		BMPER
CCM2		DDX55	RPS27	ANXA11		RNASEL			TFRC	CDH6			TMEM40	HOXD10		UNC5B
USP53		WDR90	CBR4	KRCC1		DENND5A			ARIH1	SEMA3D			COL16A1	HOXD9		KIF26B
NUAK2		ZNF839	MRPL44	MAP3K6		SERHL			SETD5	SFMBT2			OR8D2	PRDM6		DLX4
MARK2		DENND6A	TIMM10	TUBA4A		C5orf30			CSNK1A1	LRRTM3			OR5AR1	CHST2		FGF3
NT5DC3		NAA20	UBL7	ASB1		FAM171A1			ASXL1	NDUFB4			QRFPR	TMEM132E		EMX2
RALY		PET117	NFYC	ITSN1		PRKD3			PCIF1	STC2			TMEM232	NEUROG1		HS3ST3A1
CORO1C		PRR14L	UBAC1	AGAP3		KCNV2			ILF3	PERP			SPINT4	NRN1		PRSS12
FCHSD2		SLAIN2	YIPF2	CCNF		LDB3			RIC8B	SLC27A2			CCDC158	HS3ST3B1		SATB1
FYN		BBS10	CDC123	RBFA		LPIN3			HSPA4	SOCS2			MEF2B	SHC3		ARX
PPARD		MBD2	NUDT5	CLK4		EPS8L3			RBM39	DACT2			XCL1	CNIH3		ISL1
PARD6B		SCAF8	EIF3D	CD164		ZNF780B			WIBG	PRKAA2			KNCN	FOXL2		RSPO3
HK2		PYROXD2	PHB2	PIKFYVE		PLIN1			AP2B1	FAAH			ALS2CR12	FOXQ1		TCF21
RCL1		FMNL1	SMIM12	ABCC5		IP6K2			TMEM39A	RUSC2			APOF	LMX1A		DDIT4L
PIK3IP1		SHISA5	CKS2	PPM1A		DNASE2B			HSPA9	DNAH14			OR2B11	PITX1		ST6GAL2
KDM2B		TMCO3	C19orf52	HNRNPL		C16orf74			TMEM131	DZIP1			OR2L2	RASGRF1		FREM2
SPAG9		LYRM2	MUL1	COPS5		HRG			ATG7	ETV4			TKTL2	TMEM163		ZNF536
VEZF1		PIGT	DDOST	KAT7		TEX261			RFC4	H2AFY2			ACKR4	HMGA2		TBX5
ACTN1		ECHDC1	RUVBL1	PHF12		SAP30L			SLC4A1AP	MRAS			BST1	RNF220		MLLT3
PLEKHF2		ORAOV1	PIP5K1C	DARS2		SPINK4			C16orf62	GPR88			LY96	IRX5		CCND2
BTBD9		YWHAH	TTC25	POLG		HKDC1			COPS6	MATN4			CD47	ZNF503		PCDH7
RFX3		TRIM56	ZNF341	PRCC		PI4KB			TIMM21	PABPC4			CTSF	CCNO		FIGN
RAP1B		SMIM14	TRIAP1	ALDH7A1		SRL			MESDC2	C14orf39			RBPMS2	LHX2		NR2F1
RTN4		ABCE1	MCTS2P	MEF2D		PCGF1			NUP88	COL15A1			C1orf64	EVX2		NR2F2
RALBP1		MTX1	MRPL55	POU2F1		ZNF414			NUCKS1	CASP7			IFNA4	TBX2		ENPP1
SMG7		EXOSC3	NDUFV1	TFRC		TRIM68			SKA2	NRAP			GPR21	HOXC13		FGFR2
ZC3H3		FDX1L	RPL29	ZFR		NPC2			ZSWIM1	BNC2			TMPRSS11D	PAX1		NRP1
RPS6KA5		XPO4	RPS9	PCIF1		MMP27			MTCH2	FAM159A			FTSJ2	NKX1-2		TGFB2
TBC1D15		C19orf53	ACOX3	MESDC2		IMPDH1			GTF3C4	RLN3			ARMCX1	HOXA11		BHLHE41
DNAJC27		DOLK	VPS72	PPP6R3		TPP1			MGEA5	SHC2			CCDC127	T		METRNL
SOS1		HINT2	SPTY2D1	ACTR1B		FAM71E1			LNPEP	GATM			TEX36	HOXA7		CXCR4
FUBP3		C1orf27	ZNF426	DHX9		CCDC110			PELP1	SMOC1			CYB5RL	HOXA10		FGF12
TFCP2L1		ZNF35	TRMT10C	SLC25A1		MYL1			RRM1	TACR1			KLHL32	HOXC6		PAX3
S1PR2		PDCD2	PDCD11	MBOAT7		KLHL41			HDLBP	SLC13A3			SPC24	HOXA6		GATA3
SLC25A4		FAM98C	CDK17	TSEN34		GPR22			UBE2D3	CNNM4			MYH14	CORIN		GRIA3
FBXO36		RFXAP	NCOA3	ZBTB37		MICALCL			SENP3	PLD5			SCGN	DPP10		PCDH10
NRF1		NDUFA6	WWP2	HMGCR		RAD54L			ACTR1B	THBS4			AIF1	EPHA5		CDKN2C
ZCCHC7		THAP4	PNPO	IGF2BP3		HERC5			LRCH4	PKIB			HK3	RELN		GABRA5
UBE2O		ZNF770	BOD1L1	THRAP3		ARMC8			ZNF687	PRKD1			TRIM5	DMRT2		MEOX2
AFF4		CACTIN	GALK2	ZNF219		HSD17B7			HNRNPDL	BAMBI			GUCA2B	VAX1		GPR176
CLTC		MED9	TSSC1	SCAF11		TM4SF4			SLC25A40	WIF1			CPLX1	GDNF		ELFN1
SREBF2		TBC1D9B	PSMF1	TMEM201		ESRRG			BIRC6	EIF4G3			CPXM2	FLT3		SEMA5B
STAT3		FASTK	LRRC27	POLR3B		ZNF717			UXS1	TNFSF11			DSCAM	KCTD8		TRIB2
EIF1		KRIT1	TSEN54	CALR		NQO1			SF3A2	MYCL			MCF2	MKX		AIF1L
RASSF1		DUS4L	ZFYVE27	KDM5B		P4HTM			CC2D1B	PDGFRA			CCT8L2	LRFN5		NEXN
MXD1		TMEM242	COG2	ADAT1		LRRC39			EIF4E2	MMP7			FERD3L	SHH		TMEM178A
UBALD2		XRCC4	TRIP4	CAPN10		TPH1			NTMT1	PTN			KLHL13	SEL1L3		NKX2-6
CALM1		CAP1	DMAP1	EZH1		DCTN1			RNF44	CPE			XIRP2	NHLH2		RGS7BP
RPTOR		NT5C3A	SEC22B	POLR2E		TUSC2			MPLKIP	FAM98A			COPZ2	CRABP1		HOXA13
EIF5A		AARSD1	VWA9	KIF2C		KDELR1			HINFP	USP29			DYNC1LI1	DMRTA1		SIDT1
XPO1		THG1L	METTL18	RACGAP1		VTI1B			SLC25A1	ESRP1			HLA-E	TMEM229A		CACNG4
KPNB1		TP53RK	SZRD1	BRCA1		KIAA2026			SELK	GDPD1			SP110	MFSD2A		NKD1
MIB2		NDUFA4	RPS15	HEXIM2		PTGR1			MBOAT7	RNF219			ADCY4	CAV1		TFAP2E
CALM2		ZC3HC1	HIST1H4E	TEX9		THEM5			TSEN34	KCNJ2			DUS1L	HOXA3		CELF4
PIK3R1		ZCCHC10	RPL22L1	TTC1					UBE2B	MARCKS			KRBA1	LIPG		EFHD1
HSPA8		ARFRP1	ZNF175	ATP2A2					USP1	HDAC7			FXYD4	CHST7		EGR3
GNB2		LZTR1	STXBP2	GTPBP4					ZBTB37	MOCOS			XKR9	CCBE1		WNT7A
CHKA		CCT4	SWT1	PHRF1					DDX42	LOXL3			ACVR1B	PROX1		SLC24A4
TM9SF2		JAGN1	RAB11A	SH2B1					NFATC3	GIPC3			DEF6	MAFB		HEY2
ING1		SH3BP5L	NSUN4	AP2A1					IGF2BP3	RAB15			ARAP1	NRP2		IGFBP5
MNT		USMG5	CCT6B	NFYA					THRAP3	CDPF1			UNC13A	TRAF4		SERPINE2
PRCP		MRTO4	HEXIM1	IMPA2					UBAP2	POU4F1			ZNF471	ARL4C		FIBCD1
ARHGAP1		NUBP1	DNAJB12	RFX1					RHEB	PCDHGA1			CLEC11A	EPHA4		HS6ST2
TEF		PARS2	ZSCAN22	ARHGAP39					MGRN1	PCDHGA10			MCAM	NR4A2		OTOP1
PIM3		MRPL20	KLHL28	ZBTB7A					MYBL1	PCDHGA11			SYT7	TLE1		SNTB1
PTPN1		YIPF3	CDK8	CRK					NDC1	PCDHGB7			GRASP	SALL1		AK5
DDIT3		TPX2	WDR59	RNF138					ZNF219	PCDHGA8			TBKBP1	TBX3		MEGF11
LZTS2		PPT1	CHD4	HSPA5					SKP2	PCDHGB6			CHRM4	TFAP2A		GREB1
SLC25A39		KIAA0196	CLK3	RBM18					SCAF11	PCDHGA9			ESPN	BDNF		PARP8
TOB2		TTC13	RSBN1	PPP2CB					SSR1	PCDHGB5			HES2	PAX6		SPOCK1
EMC10		EXOSC10	ALKBH8	TRIM26					ADSS	PCDHGA12			DGKZ	GATA6		LONRF3
NUP50		FAM63A	DYNC1I2	MAP4					WTAP	PCDHGB3			CA11	MEIS1		SMOC2
GIT2		YEATS4	CCP110	UIMC1					CDC7	PCDHGA3			KREMEN2	PLEKHG3		ECEL1
OSER1		ABCF2	ZCCHC8	NEDD4					RIOK2	PCDHGA4			ETFB	LEF1		EPHX4
TMEM55B		ITPKC	DDX23	TMEM87B					PITPNB	PCDHGB2			ICAM5	TENM4		GRIN2C
CRY2		TOP2B	AFTPH	IPO7					RQCD1	PCDHGB1			NELFB	SMAD6		GALNT16
ORAI1		STARD4	MTR	RPE					CFDP1	PCDHGA5			APOE	PRDM16		AR
MLLT1		SUV420H2	AACS	SMC6					POLR3B	PCDHGB4			ARHGEF2	NTRK2		WBSCR17
PIGP		DEPDC7	GPATCH2L	XRCC6					MTFR1	NPB			HAP1	HHIP		COL12A1
MAPK1		ZBED5	POFUT2	PROSC					PWP1	AFF2			SFN	GBX2		NEGR1
NCDN		CHPF2	ITPR3	SPAG4					SSB	RIMS1			LEMD2	TAL1		COL4A1
DIAPH1		F3	KCTD20	TVP23B					TMEM231	LRRC3B			THY1	TRIL		DPF3
PNRC1		DUSP14	CHST12	ABCC4					NCOA5	ZCCHC16			PAFAH1B3	DUSP4		PHLDB1
FRYL		MAP3K8	NFYB	CEP68					RAD23B	CLIP4			DDAH2	GADD45G		NPAS2
HADH		MFN2	AGO2	MTMR12					RRP1B	KIAA1024			TCF19	SOX4		FBN2
NCK2		UACA	ANXA11	USP10					CALR	PRR16			PPFIA3	LATS2		FRZB
SLC45A1		NADK	LUZP1	PAK4					PRDX2	SCARA3			ERCC1	ATF3		HTRA1
BRE		GALNT11	TMEM123	ANKRD27					RAD23A	PNMA2			CYP2S1	BMPER		PKNOX2
MAPRE2		SREBF1	MAP3K6	AP2A2					CELF1	SLC6A2			SLC25A27	UNC5B		SHISA3
IFNGR1		GNG5	ASB1	CCDC12					CNBP	PCDH17			ADAM2	KIF26B		COL8A2
SUN1		SLC50A1	ITSN1	JAK1					COX5A	GABRG3			IGFALS	EMX2		RRAD
ACTB		RIOK3	CRIP2	EEFSEC					PPIA	SYT16			CEP85L	SATB1		PRRX1
HSP90AB1		DIRC2	BOLA3	PTTG1IP					KDM5B	CD70			CA3	ST6GAL2		TBX1
HNRNPH1		RMI1	GPX4	GSR					BCLAF1	OXT			COX8BP	TSHZ3		RET
EIF4A2		CATSPER2	CCNF	TNRC6C					TCP1	NEFH			CDK5R1	ZNF536		ADRA2B
POLR3E		CRY1	SNF8	ABLIM2					DNAJB1	LINGO2			KLK15	SFRP2		NTRK1
RCC1		VDAC2	OBFC1	EPS15					G3BP1	MPPED1			COL9A2	ATOH8		CA7
HSPE1		SGPL1	RBFA	APBA2					PPP2CA	SUSD4			CUZD1	MLLT3		MB21D1
AFG3L1P		TMEM52B	ATF4	SND1					ADAT1	TRIM67			CYSLTR1	NR2F1		WNT3A
KLC1		S100PBP	ASXL2	VAPA					CAPN10	CCDC69			KCNK5	NR2F2		IRF2
CDK11B		GPN1	PPP2R1A	ADNP					EZH1	RCAN2			ASB16	ENPP1		TIFA
CDCA4		PSMB7	ABCC5	CLPB					POLR2E	IRF8			RIPK3	BHLHE41		PTGER4
MAPK6		NUSAP1	OPA3	HBS1L					KIF2C	LY6H			CX3CL1	METRNL		HOXA1
GTF2A1		SMC2	AKT1S1	ABHD2					RACGAP1	PTPN5			GPR139	CXCR4		CRYBA2
HNRNPU		BLOC1S2	ZCWPW1	SLC7A5					GTPBP4	SLC1A6			CNTN2	FGF12		NEUROG3
NUDCD3		NSUN5	PTMA	FN1					SH2B1	MICALL2			ABRA	PAX3		NEUROD2
BRD2		LRRC29	PPM1A	IRF2BPL					AP2A1	PODNL1			DCSTAMP	GATA3		NMNAT2
HNRNPK		MRPS18A	HNRNPL	ATP1B1					IMPA2	RASSF2			PLS3	GRIA3		NOG
SRSF3		CCNG1	SP1	SPRED1					RFX1	PLA2G16			ACTBL2	HAS2		CBLN1
CDC6		BCCIP	RPL13A	RAI14					ARHGAP39	OSMR			GRM5	PCDH10		CPEB1
RASAL2		KIF1C	CENPO	ACTN4					ZBTB7A	WNT2			MID1	CDKN2C		SYNM
STK40		MTIF2	PRKCSH	RBPMS					RAB5A	SPTSSB			SNX19	ELOVL4		B4GALNT1
CEP95		SCFD1	CASC5	B3GNT7					LYRM5	ABCC8			ASXL3	GABRA5		WNT11
DDX5		TYW5	C2CD5	CTBP2					SOD2	CD248			DMRTB1	MEOX2		FUT4
IFRD1		TERF2IP	VCPIP1	MYO18A					PPP2CB	ABHD6			ETNPPL	GPR176		GFI1
POLG2		DNAJC19	ASRGL1	SEC14L1					TRIM26	KCNK3			KAZN	ELFN1		SGPP2
RANBP2		TIMM17A	LACE1	FSCN1					GMNN	FGD5			SLC28A3	SEMA5B		FGFR3
JUNB		EIF2AK1	ALDH7A1	STMN1					DAZAP2	RSPO4			GPR111	GAS1		IL15RA
EIF3A		TOMM7	MEF2D	JARID2					CRTAP	RXRG			NNAT	SHC4		SEZ6L
TRA2B		TMEM87A	TFRC	KLF2					TICRR	ZSWIM5			MEGF10	TFAP2E		HPSE
MATR3		COG3	AMD1	KLF9					ZMYM1	ALOX12			SCEL	CELF4		PXDC1
POGZ		EFCAB7	ARIH1	SOCS3					ABCC4	MMP28			TRIM29	PLXNA4		ZBTB46
PPP1R15A		ACTR2	CSNK1A1	CIC					MTMR12	CTPS1			APOOL	EGR3		SAMD5
SLC3A2		INTS10	PCIF1	KDM6B					USP10	PTPRE			PAPSS1	SYT6		SVEP1
MKKS		KPTN	ILF3	JUP					PAK4	PTPRR			GCFC2	WNT7A		ARHGAP27
EEF1A1		SIKE1	HSPA4	RARG					RALGDS	ASB3			NEK7	HEY2		LMO2
CDC5L		YIPF4	RBM39	BCL2L11					EEFSEC	ACADL			S1PR3	SERPINE2		SPSB4
CSNK1D		MRPS36	VPS25	FOXO3					ABL2	FAM26F			CADM4	ADCY1		ZBTB7C
USP36		THUMPD1	SMARCD2	DUSP6					MSH2	ERP29			RIIAD1	LRRK1		TSHZ1
KIAA0895		SLC39A7	AP2B1	MAP2K3					YBX1	PAPD7			CELF3	SLC43A1		COL27A1
AP1M1		ATR	HSPA9	TPM4					ABLIM2	FGFRL1			VPREB1	OSBPL6		PAQR9
HTT		HAUS5	TMEM131	ID3					EPS15	RAP1GDS1			CYP26B1	PLLP		GALNT6
GOLIM4		ITGB1BP1	ATG7	KIAA0247					APBA2	PRKAR2A			LIF	ARHGEF26		HLX
SCFD2		POLR1C	SLC4A1AP	CDKN1A					SND1	EIF4E3			RUNX1T1	SLC9A2		MGLL
RAPGEF6		TYW3	LNPEP	UBC					VAPA	FSD1L			KCNN4	CADPS2		NFATC1
USP32		PQBP1	HDLBP	DDIT4					CRKL	LONRF2			PLEK2	HLF		RFTN1
RAB4A		ESYT1	UBE2D3	ZMYND8					CLPB	MCF2L			MRGPRE	SFRP1		DHH
HLTF		RHOA	DHX9	HES1					GPBP1	PVRL3			KISS1R	CACNB4		KCNQ4
FAM168A		RPL39	LRCH4	ID1					TRPM7	MAP10			AAAS	MEGF11		NTNG2
ARL4A		NAA60	ZNF687	TLE3					ABHD2	PDYN			GAR1	PARP8		EVA1C
IVNS1ABP		SLC35A3	SUMO3	LASP1					SLC7A5	PLA2G5			OS9	CHAT		TRIM47
ATP6V0A1		BBIP1	BIRC6	PTCH1					FN1	DGKB			PPP1R11	SPOCK1		GABBR2
ATXN7L1		RNF214	UXS1	ZFP36L1					IRF2BPL	ASB4			MDH1B	FJX1		GLIS1
DNAJB6		RER1	SF3A2	PIM1					ATP1B1	DNAJC6			UTP3	ECEL1		RTN4R
FOS		BCL10	UBAP2	SPRED2					PAWR	CPZ			RNF6	SCN5A		KCNQ1
LAPTM4A		P2RX4	EIF3B	EPHA2					MAX	NDRG4			ABT1	ADORA1		RPH3AL
INSIG1		C9orf156	WRNIP1	EZR					SPRED1	G2E3			CLPTM1	GALNT16		VOPP1
ZNF184		ING5	MGRN1	MAFK					ACTN4	WSB2			RBM3	GABRA1		WNT9A
ABCG1		RPL15	ZNF219	GSE1					SLC25A36	WWC2			TMEM33	WBSCR17		DLK1
FZD7		NUDT16	PHB	ID2					ENO1	NEURL1			TMCO1	SGK3		GATA2
DUSP1		IL4I1	CFDP1	MTSS1					RBPMS	RNF32			ADAT2	COL12A1		DUSP2
HM13		BRK1	POLR3B	NT5C2					AMOTL2	GSTP1			MGAT2	NT5E		GPR26
SHF		NCSTN	PSAT1	ZFP36L2					SKAP2	PPP1R14A			DCP1A	DPF3		SGCB
GNAI2		DSN1	MTFR1	KIAA0922					ANKRD10	IGF2BP1			STX16	NPAS2		LRRC8C
JUND		SYNJ2BP	PWP1	SLC29A1					GRHL3	L1TD1			MED23	FBN2		CD83
OGFR		CCDC71	PRDX2	ARL15					TPD52	SLC38A4			NCBP2	FRZB		FHDC1
STX18		CCNDBP1	CELF1	TJP2					HS6ST1	FOXP4			PURB	HTRA1		KLRG2
IRF1		OXLD1	COX5A	GCNT2					KIFC3	SLC10A7			CCNC	PKNOX2		GFRA4
TXNIP		TUBGCP5	ADAT1	SSBP3					NFKBIA	TPK1			SSR2	SHISA3		SIAH2
ADD1		C17orf62	CAPN10	CALD1					SRC	GOT2			CIRBP	COL8A2		LTBP2
MYO1C		RNF25	EZH1	MAP4K4					SULF2	ACCSL			CCNL1	IRF2		RTN4RL1
EHD1		STK36	POLR2E	SLC23A2					SALL4	EFHB			GNB2L1	PTGER4		PFDN4
TXNRD2		SDHD	RACGAP1	UCK2					CTNNB1	ACTRT2			MTF2	KAZALD1		PPM1L
CPT1A		TIMM8B	HEXIM2	DSTN					ITGB1	ELAVL4			SGOL2	FGF19		NPY
ADIPOR1		XRCC5	PHRF1	TSC22D1					B3GNT7	MTCL1			RPL31	CHRD		EGFLAM
ANO6		TMED1	AP2A1	WEE1					CTBP2	GABRG1			PTEN	CRYBA2		CACNB3
MLLT11		NEURL2	NFYA	NQO2					SEC14L1	OR5V1			PTPN2	NMNAT2		TPM2
UBE2N		EXOC5	IMPA2	PICALM					FSCN1	HNF4G			CCDC59	NOG		CLIC6
DEDD2		ZKSCAN8	RFX1	CBX3					STMN1	SCHIP1			GARS	CBLN1		HSPA2
FRAT2		EEF1E1	ARHGAP39	MLLT10					JARID2	ADRB3			SSBP1	CCDC177		GAS6
KIFC1		SPATA5	ZBTB7A	SLC20A1					KLF2	SRGAP3			GTPBP3	CPEB1		GPC1
CYP51A1		TMEM219	ATP9B	TRIM25					KLF9	MORC1			RTEL1	MMP15		PLEKHH3
SP3		ZFAND2B	MRPL4	ANKLE2					SOCS3	NR5A2			USP30	B4GALNT1		BCL11B
TUBA1A		AKIP1	NEDD4	NDUFV2					CIC	PARP14			POLR1B	WNT11		FAM78A
GAN		MINA	TVP23B	NUDT3					KDM6B	ACVR2A			TRMT1	FUT4		CDKN2A
NARS2		HDHD2	ABCC4	NUDT4					MIDN	SMAD2			ARF4	JPH3		TBR1
SHQ1		KIAA0141	CEP68	CCRN4L					JUP	AGK			CCDC174	HCRTR1		BAI2
LIN28A		STRAP	MTMR12	PDK1					RARG	POLE4			PPP1R10	PTPRZ1		WNT10B
MYC		ZNF563	USP10	GLUL					BAIAP2	BCAT1			MRPL1	SGPP2		ADRB1
VIM		FAM133B	PAK4	SLC30A1					BCL2L11	FUT9			PDSS1	VSTM2A		ADM
WDR5		HJURP	CAMK2G	BTG2					FOXO3	GJA1			VPS52	CNR1		FOSL2
KMT2E		C7orf25	RALGDS	DENND2C					DUSP6	B4GALNT3			CIPC	ID4		JUN
RNF19A		C3orf14	ANKRD27	SCD5					MAP2K3	FAM110B			NSL1	PROK2		IER5
COL4A3BP		ZNF780A	AP2A2	PGLS					TPM4	DENND1A			CNNM2	ARHGAP27		BAIAP2L1
FBXW11		ITM2B	CCDC12	TBC1D13					FAM129B	SLC9A8			CSTF2T	GBX1		POU2F3
UVSSA		TIMM17B	JAK1	UPP1					ID3	GOT1			NDUFB3	WNT6		DRAM1
CHCHD1		ERMP1	EEFSEC	AGPAT4					KIAA0247	CLOCK			ZNF180	LMO2		ISLR2
ARHGAP35		DERA	PTTG1IP	IER5L					CYR61	MPP6			CCDC94	WNT10A		ITPKB
HDAC11		RNF19B	ABL2	LDB1					ZNF367	SS18			SNRPD3	SPSB4		CPEB2
WDR26		LPCAT3	RGS12	RAB3IL1					CDKN1A	GJC1			SLX4IP	ZBTB7C		DFNB31
B4GALNT4		PPP2R2A	DMXL1	TSPAN14					TGIF1	KCNN2			NUP54	LARP1B		GALNT9
U2AF1		KIF24	TRPM1	CCM2					KANK1	ACP6			SUPT5H	HHIPL1		SYT2
PLXNB1		MED8	TNRC6C	CLIC4					CITED2	SPATS1			ZNHIT3	TSHZ1		SCTR
RAB5C		RPL6	EPS15	USP53					UBC	RMND5B			RNASEH1	COL27A1		SIRPA
UGDH		DYX1C1	SND1	PTK2B					HES1	APOA2			WDR4	GALNT6		IFFO2
AZI2		PLRG1	ABHD2	NT5DC3					RBPJ	TOMM40L			LSG1	HLX		MPP2
CNNM3		MAFF	SLC7A5	CORO1C					LASP1	APOC1			ECD	MGLL		ADAMTS5
NUDT19		PI4K2A	IRF2BPL	FCHSD2					SPRY2	C2orf88			MED11	NFATC1		MAB21L2
JOSD1		WDR25	ATP1B1	FYN					ZFP36L1	DUSP27			MRPL10	EMILIN2		LEPREL1
TNIP2		C16orf72	MAX	PPARD					PIM1	APOBEC1			COPS2	SLC39A8		WNT9B
CARM1		NFU1	UBL3	PARD6B					SMAD7	GDF3			GEMIN6	LBH		SERTM1
CLUH		DDX52	RAI14	SDC4					SPRED2	BCL2A1			KLHL20	GABBR2		CALHM1
HNRNPF		DCTN6	ACTN4	HK2					EPHA2	IFITM5			RPS7	GLIS1		CPED1
KLHDC2		TATDN2	ENO1	RCL1					EZR	TMEM253			SF3B5	RPH3AL		GRAMD1B
UMPS		CCDC171	RBPMS	HNRNPLL					MAFK	EXOC3L1			MRPL3	DLK1		CD244
ANKRD17		CHMP2B	GRHL3	PIK3IP1					GSE1	REST			RPL32	GATA2		ZNRF4
CHMP5		NIPSNAP3B	SRC	KDM2B					ID2	TUBB3			NME1	DUSP2		KCNG3
CNOT10		PSTPIP1	ITGB1	SPAG9					MTSS1	ZNF616			RTTN	GPR26		LAMA5
RNMT		C4orf27	MYO18A	BTBD9					NT5C2	CFP			ZMPSTE24	SGCB		DPYSL5
TRIP12		SNORA78	SEC14L1	RFX3					ZFP36L2	GCK			ZDHHC6	LRRC8C		PRKAR1B
CSNK2A1		SNORD55	FSCN1	RAP1B					ARL15	EVC2			ZNF143	ADRA2C		DNAI1
TRPM3		RPL35A	JARID2	RTN4					TJP2	ADIPOR2			RPS27	CD83		IRAK3
CDK12		PARP10	KLF2	RALBP1					BCAR1	C22orf15			WDR53	FHDC1		GAREM
MAML1		MED17	KLF9	SMG7					MAP4K4	SLC7A3			KBTBD4	KLRG2		COL13A1
STK38L		SEC61G	SOCS3	ZC3H3					UCK2	STMN2			MRPL16	GFRA4		TTBK1
NUP160		GNPDA2	CIC	SLC12A7					IL6ST	ATCAY			MCM8	NPAS1		DENND5B
FTH1		TMF1	FOXO3	ATG14					REEP3	SLC17A9			TRAPPC8	BICC1		ITGB4
TAF13		CUL1	ID3	FUBP3					AKAP1	HSD17B14			UBE2J2	SIAH2		MYO5B
PSEN1		ARFIP2	CDKN1A	TFCP2L1					XBP1	PP2D1			UQCC1	KCNK15		PTPRS
MDC1		EEF1D	CITED2	S1PR2					OTUD7B	C20orf195			TMED9	LAD1		ADAMTS18
PKM		OGFOD3	UBC	SLC25A4					DSTN	CHCHD10			MANF	RTN4RL1		CACNA2D1
TCF4		ASB7	DDIT4	FBXO36					PTP4A1	CYB5R1			PLOD3	PFDN4		LAMA2
KIAA0430		YEATS2	ZMYND8	NRF1					TSC22D1	CHCHD7			ACTR3	RASSF10		PDZRN3
AP1G1		JMY	HES1	ZCCHC7					WEE1	MOG			PEX3	OCLN		COBLL1
CCNL2		C1orf50	ID1	ZFP64					HSPB1	AEBP2			KCTD5	PPM1L		SLC2A13
PIGG		LEPRE1	PIM1	KHDRBS1					PACS1	TCEA3			CRYZ	STK32A		SLC41A2
TBCC		CALR3	EPHA2	UBE2O					TSPAN15	TRH			EIF3D	GDF10		ALCAM
CALU		RBM5	MAFK	AFF4					BMF	HPS3			NEK4	PTH1R		MECOM
RAB8A		F8A1	GSE1	IGSF8					OSBPL1A	AGTRAP			TTC26	CACNB3		EPHA3
NECAP1		NSMCE2	ID2	SREBF2					NQO2	SMS			ZNF665	CHRDL2		SEMA3A
SPOP		RPS27L	MTSS1	STAT3					PICALM	BRWD1			SHPK	SP5		KITLG
MAT2A		TMEM9B	NT5C2	UBALD2					CBX3	LDHB			ENDOV	HSPA2		VCAN
DMTF1		TMEM116	ZFP36L2	AHDC1					MLLT10	TMEM8A			GIPC1	CNPPD1		CADM1
MEF2A		USP21	KIAA0922	LPHN1					KLF16	FBXO15			USE1	KLHDC8A		FGF10
BAZ1B		ACAD8	SLC29A1	CALM1					PATZ1	IGFBP2			TRMT61A	ADM		SLITRK5
YWHAZ		PGM2L1	ARL15	MKRN1					TGIF2	XRN2			ZFAND2A	FOSL2		CCDC85A
RTFDC1		BSCL2	TJP2	SNTB2					CLCN6	IFITM2			C19orf52	JUN		SFMBT2
KMT2A		ZNRD1	GCNT2	CALM2					DIDO1	ZNF205			MUL1	LFNG		LRRTM3
TOR1B		RAB13	SSBP3	PIK3R1					GID8	ZSCAN10			ZNF638	PDE4DIP		NEUROD1
ESRRA		TSFM	UCK2	ZFP36					RHOF	MYBL2			DPH7	CHSY1		AMIGO2
XRCC3		VKORC1	IL6ST	ANP32B					SLC20A1	RIF1			RPS21	ITPKB		CAPN2
INCENP		CREBL2	AKAP1	TACC1					TRIM25	PHC1			POLR2J	CPEB2		TTC39C
VKORC1L1		CTU1	TSC22D1	GNB2					MESDC1	SOX2			1954-07-01	LPGAT1		DKK1
SLC25A25		RABL3	WEE1	USP12					PRDX6	SLC2A3			COPS8	ESRP2		STC2
SLC1A4		TRIM23	BMF	ING1					GNA13	IFITM3			NUDT15	DFNB31		PERP
ATG101		DCTN5	OSBPL1A	DYNLL1					TBC1D9	THBS2			IQCC	GALNT9		RUSC2
SDHB		WDR12	NQO2	HSP90AA1					TMOD3	ULK1			OGFOD2	KIAA1522		DNAH14
CUEDC2		TIMM10B	PICALM	MNT					TRIM8	ALPL			MRPL55	IFFO2		DZIP1
SAMM50		ZFYVE19	CBX3	PRCP					MOB4	MLLT6			MAP1LC3B	RHOQ		ETV4
ACAD9		WDR92	TGIF2	ELOVL6					SMG1	MYCN			RXRB	CXCL12		H2AFY2
DPM1		GATS	CLCN6	CRY2					CCRN4L	NANOG			CCDC101	HS3ST5		ALDH1A3
ZNF330		NMRAL1	DIDO1	ORAI1					PDK1	SLC5A11			RPL10A	MC4R		OBSL1
L3MBTL2		NPL	GID8	MLLT1					FAM91A1	TEX264			RPL26	CALCR		RNF150
ERP44		ZNF213	RHOF	PIGP					SMYD2	TDH			TACO1	RSPO2		SYT12
INVS		NDUFC1	SLC20A1	MAPK1					GLUL	ANKRD6			KANSL3	TMEM108		VIPR1
ARL5B		MRPS33	MESDC1	NCDN					SLC30A1	CBX7			RPL29	LPL		ADCYAP1R1
HARBI1		HIF1AN	NDUFV2	YLPM1					H2AFX	GJB3			RPS9	TMEM215		C1QL1
CSTF3		MED18	NUDT3	PNRC1					KIT	POU5F1			NDUFS7	SERTM1		DUSP15
LGTN		ESPL1	NUDT4	FRYL					MSH6	LRRC2			ZNF426	HES5		GPR88
BRPF1		RAD52	CCRN4L	SLC45A1					BTG2	ATP10D			EEF1B2	THPO		MAMLD1
C5orf51		VPS29	PDK1	VIT					DENND2C	HSD17B11			EXOSC5	CPED1		PODN
CTC1		MRPL53	GLUL	BCL7B					SCD5	C1orf106			DHX36	LAMA5		HR
TWISTNB		SREK1IP1	KIT	ARHGAP12					PGLS	FBXO27			SWSAP1	TNFSF9		RBPJL
LEPROT		YME1L1	BTG2	RABEP1					TBC1D13	NKAIN4			FBXO8	ATP11A		ERBB2IP
FAM60A		PGGT1B	DENND2C	NSMAF					UPP1	C15orf41			KATNA1	DPYSL5		RTN1
HMCES		POC1B	SCD5	MAPRE2					VAT1	DPPA5			SEC23B	PRKAR1B		UBE2J1
RNF10		UQCRC2	TBC1D13	ZNF148					AGPAT4	ENOPH1			GFM2	PGBD5		ACAN
USP22		RBL2	UPP1	ACTB					LDB1	HEXB			TTC14	DNAI1		BNC2
TIPRL		CCDC90B	AGPAT4	POLR3E					NFE2L2	PLA2G10			TMEM167A	IRAK3		COL9A3
HIAT1		TMEM258	LDB1	HMGN2					TSPAN14	PKD2			NSA2	GAREM		TMEM181
UTP18		RAB29	RAB3IL1	YARS					CCM2	C16orf45			SERINC1	MAPT		GXYLT2
CEP120		PRPSAP1	RAB30	CDCA4					CLIC4	ZFP42			MTBP	GPR157		FAM159A
RNF141		PPIL2	TSPAN14	DDAH1					NUAK2	C17orf53			EIF3M	COL13A1		RLN3
FBXO9		CYTH2	CCM2	NUDCD3					PTK2B	EMB			PSMD7	DENND5B		DCBLD1
AMDP1		MPZL3	CLIC4	BRD2					MARK2	DGKE			LRRC40	ITGB4		EDARADD
C9orf41		ZNF79	PTK2B	HNRNPK					NT5DC3	FAM13C			MFAP3	PTPRS		SLC25A21
SH3GL2		ZNF331	MARK2	SRSF3					CORO1C	TMEFF1			PARG	ADAMTS18		FAM114A1
C12orf5		NPRL2	CORO1C	RASAL2					FCHSD2	ARSA			STX12	CACNA2D1		SMOC1
C16orf46		MICU3	FCHSD2	AKIRIN2					FYN	CPSF4L			TMEM234	LAMA2		METTL24
BRD1		USP15	FYN	STK40					PARD6B	SYNCRIP			WWP2	PDZRN3		TACR1
[truncated: 6,504 more rows]

## Sheet: down matrisome genes (TF pert.)
Downregulated matrisome genes after TF pertrubation
CREB_DEPLETION_GDS3487_41_human_K562 myeloid leukemia cell line	FOXO1_KD_GDS2720_477_mouse_LSK	FOXO1_KD_GDS2720_478_mouse_LSK	FOXO1_KO_GSE40655_481_mouse_T reg	FOXO1_KO_GSE46025_480_mouse_CD8 T cells	GATA-1_KD_GDS1245_81_mouse_megakaryocytes	GATA3_Ectopic expression_GDS4080_622_human_Basal Breast Cancer Cells	GATA4_INACTIVATION_GDS3663_519_mouse_Endothelial-derived cells	GATA4_KO_GDS3486_483_mouse_jejunum	Gata-4_KO_GDS4782_329_mouse_Adult heart during pressure overload	JUN_KO_GDS4205_294_mouse_B lymphoid cells	MYC_KD_GSE22139_685_human_medulloblastoma	MYC_OE_GSE43730_684_human_MCF10A cells	NFE2L2_KO_GDS514_699_mouse_liver	STAT3_OE_GDS3444_576_mouse_Cultured embryonic stem (ES) cells
COMP	ECM2	FBLN2	COCH	COL27A1	TGFBI	IGFBPL1	COCH	FBLN1	EMILIN2	EMID1	COLQ	CRIM1	FN1	COCH
CTGF	LAMC2	IBSP	IGFBP4	EPYC	ANXA3	NTN4	LGI4	FGB	IGFALS	FGB	DSPP	CYR61	MGP	FBN2
DMP1	NTNG1	IGFBP5	MFAP1	ESM1	CLEC12B	PXDN	RSPO4	FGG	LAMA5	FGL2	THBS2	EFEMP1	POSTN	EPYC
RSPO3	MUC15	IGSF10	CD209	SEMA5B	COLEC11	COL8A1	ZP1	FRAS1	TECTA	HMCN1	C1QTNF9	FBLN5	SMOC2	LGALS2
COL19A1	ADAMTS8	LAMC2	OVGP1	ADAMTS15	ADAMTSL1	GPC6	KERA	NID2	CLEC9A	IGFBP4	PROL1	FBN1	TNFAIP6	LGALS8
SFTA3	MMP12	SLIT1	ADAMTS6	CTSE	F10	CST2	CLEC11A	PAPLN	COLEC12	LAMB1	CTSL	FBN2	WISP1	SEMA3A
ADAM23	CHRD	THBS1	ADAMTS8	SERPINA9	F13A1	CST4	CLEC4G	TECTB	FREM2	PLXNA2		FN1	COL15A1	SEMA4B
ADAMTS18	THPO	TINAG	EGLN3	CSF2	MMP19	LOX	ELFN1	VWCE	ADAM10	SEMA3A		IGFBP7	COL2A1	SEMA6A
CST9		TNXB	ITIH5	IL15	SLPI	PRSS12	MBL2	FREM1	ADAM28	SEMA5B		LTBP1	ANXA7	ADAM22
MMP10		P4HTM	PAPPA2	IL18	TGM3	FGF5	PLXNA4	HPX	CTSC	ADAMTSL5		MFAP5	C1QTNF3	ADAM7
SERPIND1		SERPINA11	BRINP2	MDK	BMP2	INHBB	ADAM9	MBL2	CTSF	CTSE		NTNG2	GPC3	MMP13
SERPINI1		BMP10		PSPN	CCL13		ADAMTS19	REG1A	MEP1A	CTSO		SPARC	GREM1	MMP3
ANGPT1		BMP8A		WFIKKN2	CCL2		F13B	CD109	MMP11	EGLN3		SRPX2	LGALS4	ANGPT2
IL17A		CCL24			CCL5		HTRA4	LOXL3	MMP12	LEPREL2		DCN	CTSC	CCL11
TNFSF11		CCL3L3			CXCL10		LEPRE1	SPAM1	MMP15	PLOD2		PRELP	EGLN2	EPO
		CCL4			CXCL3		P4HA3	TMPRSS15	SERPINB8	FSTL1		SRGN	PRSS2	FGF19
		CXCL10			IFNG		PLAU	ANGPTL7	CCL24	S100A1		VCAN	SERPINF1	FGFBP1
		CXCL2			IL6		SERPINA6	BRINP2	CLCF1			LGALS1	SERPINI1	GDF5
		CXCL3			S100A4		SULF2	CCL24	CSF1			CPN2	BMP15	IL7
		FGF4			S100A9		TGM6	CSF2	EGF			OGFOD1	CCL5	LEFTY1
		HHIP			TNFSF14		BMP5	EGFL6	FGF16			SERPINB3	CRLF3	S100B
		IL1B			TPO		CCL13	IL17B	MSTN			SERPINE1	FGF7	SFRP4
							CCL24	IL1B				SERPINE2	FRZB	TNFSF10
							GDF2	IL2				SULF1	GDF5
							HGFAC					CCBE1	IL1B
							INS					EPGN	IL6
							LEP					EREG	PRL
							LTA					FGF4	WNT5A
							TCHHL1					IL1B
							TDGF1					IL6
							WNT3					NRG1
												S100A16
												S100A8
												TGFB2
												WNT11
												WNT5A

## Sheet: up matrisome genes (TF pert.)
Downregulated matrisome genes after longevity TF pertrubation
CREB_DEPLETION_GDS3487_41_human_K562 myeloid leukemia cell line	FOXO1_KD_GDS2720_477_mouse_LSK	FOXO1_KD_GDS2720_478_mouse_LSK	FOXO1_KO_GSE40655_481_mouse_T reg	FOXO1_KO_GSE46025_480_mouse_CD8 T cells	GATA-1_KD_GDS1245_81_mouse_megakaryocytes	GATA3_Ectopic expression_GDS4080_622_human_Basal Breast Cancer Cells	GATA4_INACTIVATION_GDS3663_519_mouse_Endothelial-derived cells	GATA4_KO_GDS3486_483_mouse_jejunum	Gata-4_KO_GDS4782_329_mouse_Adult heart during pressure overload	JUN_KO_GDS4205_294_mouse_B lymphoid cells	MYC_KD_GSE22139_685_human_medulloblastoma	MYC_OE_GSE43730_684_human_MCF10A cells	NFE2L2_KO_GDS514_699_mouse_liver	STAT3_OE_GDS3444_576_mouse_Cultured embryonic stem (ES) cells
CILP	ADIPOQ	EMILIN3	CTGF	SNED1	DPT	HMCN1	AMBN	ADIPOQ	ADIPOQ	LMAN1	CTGF	FGL1	DMP1	IGFBP7
EYS	DMBT1	FGA	NID2	COL10A1	IGFBP2	LAMC2	LAMB3	EFEMP1	CRELD1	BMP1	CTHRC1	LAMA2	LGI4	LGI4
IGFBP4	EMILIN2	KCP	COL9A3	SPOCK3	NTNG2	MATN2	LGI2	EMILIN2	CTGF	OGFOD1	ECM1	MGP	LTBP3	MATN3
COL15A1	IGFALS	PCOLCE2	HAPLN3	ANXA1	WISP1	SLIT2	VWF	SNED1	LGI1	SERPINB1	EFEMP2	VWDE	NOV	ANXA10
COL1A2	IGFBP5	OPTC	ANXA1	ANXA5	ANXA11	COL4A5	ANXA7	TNR	NELL2	SERPINB5	FBN1	CLEC5A	TECTB	SEMA5A
ANXA5	LTBP2	CLEC4F	LGALS3	LGALS3	CLEC14A	LUM	ITLN1	SPOCK3	SLIT2	EGFL6	FN1	MUC16	THBS1	CTSG
PRSS2	POSTN	CTSW	PLXNA1	MUC13	ADAM7	CST6	CELA2A	ELFN1	THBS3	IGF1	HMCN1	SEMA3G	COL22A1	SERPINB1
SERPINE1	SRPX2	MMP12	ADAM8	MUC20	ADAMTS15	LOXL1	F10	MUC15	ANXA9	INSL6	IGFBP3	MMP7	CLEC3B	SERPIND1
INHA	TINAG	PRSS12	ADAM9	PARM1	EGLN2	MMP1	PCSK6	SDC4	CLEC4E	LTA	IGFBP7	PRSS12	ITLN1	TLL1
LEFTY2	TNR	AREG	CST7	PLXDC1	TGM2	MMP12	SERPINA12	ADAM18	SEMA3C	S100A14	LAMB3	ST14	PLXNB2	CSF2
PDGFA	PRG3	FGF8	FAM20A	PLXNC1	FGF12	MMP3	SERPINB7	ADAMTS7	SFTPC		LAMC1	BMP6	SDC3	CTF1
	C1QTNF2	GDF15	PLG	SEMA7A	MEGF10	PAPPA	CHRD	LEPRE1	CTSK		LTBP2	CCL28	SEMA3A	FGF6
	C1QTNF6		SERPINB7	ADAMTS4	SCUBE1	PRSS3	GDF5	MEP1A	FAM20C		MATN2	INSL6	ADAMDEC1	IL15
	CLEC1B		TGM2	F10	TNFSF8	TIMP4	IGF2	BDNF	ITIH5		MXRA5	S100A14	CTSE	INHBE
	LGALS3		AREG	BMP6		BMP5	S100A4	BRINP3	LEPREL1		NTN4	S100P	MMP9	TNFSF4
	SERPINA7		CCBE1	BTC		CCL26	TNFSF8	EREG	PCSK6		COL15A1		CSF2	WNT5A
	AREG		CCL3L3	FASLG		CHRDL1	VEGFA	FGF19	TGM1		COL1A1		HGFAC
	CCL11		CSF3	IL1RN		HHIP		FGF20	TGM2		COL4A1		INHBB
	IFNG		FASLG	IL22		IL1A		IL6	TIMP3		COL5A1		PTN
	IL1A		IFNG	IL7		INHBA		LTB	TIMP4		COL5A3		TDGF1
	LEFTY2		IL17B	S100A6				S100G	ANGPTL7		COL6A2		WNT7B
	SFRP4		IL4	S100G					BMP5		CSPG4
	XCL1		TGFB3	TNFSF14					FIGF		FREM2
				XCL1					LEP		MUC15
									NRG4		PLXNC1
									PDGFD		CTSB
									TCHHL1		HYAL4
									TGFB2		ITIH5
											LOX
											MMP10
											MMP7
											MMP9
											PLAU
											SERPINE1
											CCL2
											CCL5
											CXCL1
											CXCL10
											CXCL11
											CXCL8
											IL6
											INHBA
											LIF
											S100A3
											TNFSF10
											TNFSF4
											WNT5A

## Sheet: up genes after TF pertrubation
All upregulated genes after TF perturbation
https://maayanlab.cloud/Harmonizome/dataset/GEO+Signatures+of+Differentially+Expressed+Genes+for+Gene+Perturbations
CREB_DEPLETION_GDS3487_41_human_K562 myeloid leukemia cell line	FOXO1_KD_GDS2720_477_mouse_LSK	FOXO1_KD_GDS2720_478_mouse_LSK	FOXO1_KO_GSE40655_481_mouse_T reg	FOXO1_KO_GSE46025_480_mouse_CD8 T cells	GATA-1_KD_GDS1245_81_mouse_megakaryocytes	GATA3_Ectopic expression_GDS4080_622_human_Basal Breast Cancer Cells	GATA4_INACTIVATION_GDS3663_519_mouse_Endothelial-derived cells	GATA4_KO_GDS3486_483_mouse_jejunum	Gata-4_KO_GDS4782_329_mouse_Adult heart during pressure overload	JUN_KO_GDS4205_294_mouse_B lymphoid cells	MYC_KD_GSE22139_685_human_medulloblastoma	MYC_OE_GSE43730_684_human_MCF10A cells	NFE2L2_KO_GDS514_699_mouse_liver	STAT3_OE_GDS3444_576_mouse_Cultured embryonic stem (ES) cells
LINC00342	VRTN	VRTN	CASP6	CTTNBP2	MED28	MMP3	GPR20	SENP1	LAT2	ELOVL4	KRT75	RBPJ	HTT	IPO8
LOC100506526	RPL17	RPL17	ZCCHC17	FGR	NDUFA9	RNF182	CHRD	KIAA0907	KIF26B	MAP2K5	LOXL1-AS1	GULP1	NKX2-3	WAS
DBIL5P	APEX1	ARSA	SGCE	CMKLR1	MDGA1	CTAGE9	GDF5	XRCC3	PXMP2	PCDH11X	EVI2A	MUC16	CYP2S1	EIF2S2
FLJ34521	EVI2B	POLR1D	CCKAR	TRIM9	FOXK1	LOXL1-AS1	BCLAF1	TRIP10	SV2B	NCS1	HLA-DRB4	TMEM11	CSTF3	PEX19
IFIT5	RNF113A	ZXDB	CAGE1	IMMP2L	SPIN4	PSG1	HAUS3	USP3	ZBTB42	GULP1	SPATA42	TMEM141	DSCR3	HIST2H2BF
SCNN1D	HIST1H2BF	KIF26B	PI16	ZBTB42	TLE3	DUSP2	MCEE	TAT	NELL2	MCMBP	HIST1H2AC	ZNF750	SEZ6L	UBE2Z
OGG1	SRPRB	CD300LD	TMEM88B	ITGAD	TEKT4	NUP210	CABIN1	PSORS1C2	DLG2	WIBG	HIST1H2BC	VSNL1	GNPTAB	PPEF2
ZFP41	ZNF25	ACAA2	HAPLN3	RGS22	OLFML2A	PSG4	AMBN	SORCS2	MPP7	ARL10	CPQ	PTPN22	KLHL9	TNFSF4
EVI2B	EFCAB3	EIF4A1	PLK5	SLC38A8	RB1CC1	PSG5	PHF23	ZCCHC18	CCDC60	OLFML2A	LOC100507560	KRT15	MOS	SERPINB1
MS4A4A	FAM3D	AIM2	PARK7	LINGO4	BCL2L15	PSG7	GK5	MGRN1	OR2K2	SERPINB1	SLC2A10	COBL	WBP4	SLC35C2
SLC14A2	ATOH1	ECSCR	PIK3C3	SORBS3	CTRB2	CLIC5	LRRFIP1	DFNA5	PCGF5	IFI30	TAS2R38	S100P	PPP3R1	USP48
MRPS31	KIAA0319L	CYP1A2	COL9A3	MRPL51	MYOZ3	MARVELD2	WBP4	XKR5	PRLHR	CELSR1	LOC100506699	TCN1	STOM	CTRB2
LINC01087	C1QTNF2	ESRP1	PRPF3	P2RY1	STMN2	CDH1	HMG20B	SCN11A	BTBD1	FBXO34	LOC100287221	CLDN1	TCL1A	SYCN
CCDC142	SRPX2	MLXIPL	ERMN	TYW1	KCTD11	PON3	SUMF1	ANKUB1	ATOH1	CPA2	CYS1	ACSL1	TNFRSF18	SLURP1
TRBV27	SPAG8	ZSCAN5B	FAM49B	EYA2	PDE1B	COL4A5	CIDEB	GTF2H4	AGMO	SCARF2	CXXC4	ELF3	GNAT1	DDHD1
LOC154872	DMBT1	LINS	PLG	NME5	MARK4	JUP	SLC25A41	MGAM	DGCR2	CKB	PGAM1	RARRES1	RAB33A	RNF103
LOC101927709	ADORA3	GDF15	CENPI	GPR35	VASN	OVOL2	SCN11A	ENDOD1	ARL8A	ADAD2	NFKBIZ	AZGP1	ANKRD1	MRPS18B
LOC441454	LRRC52	PLCXD3	CASP1	MEIOB	TNFRSF11B	FOXC1	CELA2A	ARHGAP31	PCSK6	GPR34	TNFSF4	SEL1L3	ST6GALNAC6	THYN1
PPP3R1	SHISA3	RUNX2	SV2C	AMZ1	CCDC166	DMKN	VWF	HOXB9	FAM83A	NUPR1	JUP	MGP	PNLIPRP1	LIMCH1
EFCAB3	STMN2	SDR39U1	BCORL1	TMEM70	FAM170A	SPINT1	IL12RB2	HDC	KXD1	AKR1C3	SLC22A13	CYB5A	SYCN	MAPK8
AIM2	LEFTY2	KDM5B	CATSPER2	AIM2	RCAN1	ANKRD30B	TPRKB	CBR3	KLK5	LRRC41	CDIP1	PRDM1	IDO1	RAB3D
PPEF2	CAMK1G	HS3ST3B1	FAM46B	NDUFS8	HRAS	UCA1	PCSK6	PTPN11	GFRAL	PDS5B	NHLH1	CTH	RGS9	MAFK
OR4D2	TACR1	STRA8	PTPN22	CCDC155	CAPN5	PTGES	CCDC14	PAX4	CAPG	TRAPPC3L	SPINT1	CRYL1	INSR	CD3G
LL0XNC01-116E7.2	IL12RB2	TBR1	CCDC85B	FMO1	ETS1	SLC44A1	STRA6	CYP4X1	BAIAP2L1	ZNF518A	CXCL11	RNF175	PTGES	CAPN5
TMED6	OR2S2	NPM1	PDE6C	PERP	CTH	KIAA1462	PINK1	HOXA9	HERC6	ACY3	BNIP3L	GRB14	MARK4	CTSG
NMUR2	CDIP1	EPPIN-WFDC6	CCR1	SAMD3	ZBED5	TCN1	ROS1	IL6	RHOD	CTH	IL6	PPP1R9A	PTPN9	JAG2
TRMT12	IDO1	BMS1	MANBAL	STMN2	AP4E1	PAPPA	FAM170A	CLCA2	CYP2U1	FZD6	CXCL1	INSL6	LTBP3	IL18RAP
DGCR14	DMKN	CDK5R2	FABP4	DAPK2	ABCG2	CYP24A1	MRFAP1	RANBP17	ARSG	CSNK2B	LOC340357	ARID2	PINK1	UBE2V1
CLP1	PTGDR	YPEL5	HAVCR2	HDC	ZC3H12A	TNFRSF11B	POU2F3	TBRG1	TTC30B	SLC6A9	ZNF208	SEMA3G	CYP24A1	CORO1C
MUS81	ARHGEF28	SOS1	EHD1	OAS3	MND1	GBP2	LONP1	NOS2	PFN2	INSL6	CCT6B	DSC2	ATOH7	CD5L
PRSS2	DCAF11	EPHB4	TTC25	KCNH6	PSMA8	CST6	GALNT9	CCDC175	MEF2D	RYR2	S100A3	SAMD12	RAB3D	MAF1
PNPLA1	AKR1B10	EMILIN3	SEPT3	HAVCR2	MAP3K9	LPL	VPS25	CMIP	DZIP1	CENPB	SRCIN1	MYB	ANKS3	UEVLD
LRRC52	CYP4X1	NBN	MYCN	ANKS3	RAMP2	DIRAS3	PON2	ANKRD12	FIGF	MAGED1	CLIP2	ANKRD22	MAPK13	BMS1
BST2	DENND2D	SIGLEC9	ARL13B	TNFRSF8	RCBTB2	TMEM40	SP1	SMARCA5	GRIA3	COX14	ARFGAP3	RBM46	GABRA1	PTGER3
LEFTY2	ARL14	TRIM63	PRDM1	ABCB9	LMAN2	JAG2	MTERF2	GSDMC	LECT1	SLC4A4	ZNF329	KRT8	PKP4	TTC30B
DMKN	NOTCH2	MOGS	KCNJ12	FAM126A	LACTB	ENPP4	SERPINA12	SLC10A2	CPS1	LARP4B	FBXL13	RASSF9	TSC2	INHBE
PLEKHA4	RNF24	STRN3	MAPK13	ZNF512	TFDP2	ZNF641	FUT11	POMC	ALDH1A1	GNPDA2	YPEL5	DNTT	STRA8	OAZ3
ZNF506	SLC22A16	GRHL1	SOGA3	SLC24A3	TNFSF8	PRSS16	WLS	PLP1	MAP1B	SLAMF7	MMP9	GPM6B	AFF4	POMC
BRAF	LHFPL5	CACNA1S	STRADA	MDM4	RAD23B	RHOD	LTB4R2	CHID1	DNAJB1	TSSC4	CPA4	BMX	TLE1	MRPS17
FCGR3B	CELF4	SIN3B	LRRC4C	RGS1	SCUBE1	ERMP1	METTL21A	BTBD7	GGH	SDR42E1	AGBL5	CXADR	FLNA	MAL
LOC102659288	CCDC109B	GPR137C	IL18RAP	TUBB4A	TEKT1	ABCG2	TRPM5	ANKRD37	TBPL2	TIFA	MUC15	MKNK2	SMO	ESR1
ABCB6	SVIL	LRIG1	ADAM8	TAPBPL	RBM46	MAL2	YAE1D1	NDUFB7	KRTAP4-9	EPB41	PLXNC1	EHF	SAA2-SAA4	IL15
BCL6	SNX32	DENND2C	CEBPB	TBC1D2	ATP1B4	SAMSN1	CREBZF	NETO1	SNAP91	ZNF318	HAS2	SCARNA10	RYR2	CDH9
LOC285147	ASGR2	RIPK4	CD5L	STOX1	AIFM1	RFESD	TNFSF8	SH3BP5L	GLT6D1	ATP6V1G1	HYAL4	SNORD1C	MMP9	FAM96B
CD3G	AKAP1	HEMK1	KLRG1	CEP170B	BTN1A1	PLLP	ALOX15	NOD1	PENK	KARS	LINC01134	PITRM1	RASGRF1	IRS1
PIGR	UCN3	KANSL1	LAIR1	HENMT1	ZNF236	PTPN3	CEP170	MUC15	RER1	PLA2G4A	GPR137C	ACSM6	PIGT	PLS3
MS4A3	LOC729800	KAT2A	KCTD12	PLXNC1	INTS1	SLC4A4	AKT1S1	RLBP1	LAG3	CTNND1	LOC100506047	LCA10	CD4	ID3
S1PR3	UPB1	CDON	MOBP	CHRNE	SLC1A5	PRND	LAG3	RAB19	TGM1	LTN1	115022	LINC01152	CHRNA1	ANKRD49
CLIP2	HIST1H3G	MACC1	DDX3Y	CD72	AP5M1	OTUD1	RPS13	ZFYVE20	CCDC68	DNTT	IGLON5	RNU4-2	VDAC3	CD83
SUSD4	TAS2R4	SEC14L5	PTCH2	CACNA1A	ARID1B	LAMC2	RTN4	FOXJ3	MRPS35	OR13D1	ICK	MIR128-1	CCS	GGH
FAM110B	CPS1	HOXD9	SLAMF7	SEC16A	RING1	CHRDL1	CGGBP1	TULP1	FZD8	SCRN2	KRTAP5-2	SNORD36B	LHX1	MINOS1
FAM96B	OCIAD2	RPL3	TBC1D2	IL2RA	PPP1R16B	TFEB	CHD2	ATP1B4	ARHGAP5	PSMC2	LINC01267	SNORD63	ALG5	SETD6
LINC00970	REXO4	ZIC2	ATP6V1B2	CRMP1	TMIE	CDS1	CALU	NFXL1	THBS3	ARHGAP5	LOC102724612	TTLL13	TDGF1	NMT2
C14ORF178	PRG3	CYB561	DKKL1	CD38	DAPP1	ZDHHC9	TCP11X2	TMEM213	BMP5	TRIM50	LIPG	C16ORF3	UBLCP1	MEIS2
LINC01016	PAGR1	ARPC2	STIL	ICK	EGLN2	TMEM139	CYB561A3	DCUN1D1	FMO2	TRIM32	ANKRD13D	MSL3P1	MED14	HTATSF1
SRSF11	EPHB4	PRSS12	PENK	NRARP	NTNG2	DPP4	TFCP2	MGAT4C	MYBPC1	OSR2	NHSL2	LOC729164	NFS1	RDH5
SP6	TLN1	PAIP2B	SCIN	BTC	RASGRF2	GLIS3	SERPINB7	IRGQ	MAN2A2	S100A14	ZNF229	LOC100132099	TULP1	KCNA7
ERH	LMAN2	NDOR1	RUNDC3B	CNKSR1	THUMPD3	GPR137C	TOMM34	ARID1B	IGF2BP2	CYLD	TRBC1	HOXB-AS3	HAS2	TFPT
RERE	KRTAP4-9	CPLX1	HSPB2	GSDMD	ARAP2	BMP5	CYTH1	HDAC8	SMIM15	MAP3K4	SHC4	FCRL3	EIF5A	AKT1S1
EYS	LOC100130301	CCR8	ZNF646	CD160	IRAK1BP1	CXADR	GAS2L3	PNN	HCN1	ADH1C	HSD17B7	MIR30C2	KCNJ2	MOGS
LINC00852	HCAR1	STBD1	RASSF5	STX2	CHRNB4	LIPG	FOLR1	ATIC	KPNA2	CLYBL	NTN4	ZNF792	ADAMDEC1	ELAVL3
LRRN1	SPAG17	SLC25A5	B4GALNT4	FASLG	LRP3	ALDH1A3	COPS5	TMEM252	ATP8A2	NFYC	GBP3	ZNF30	CTTN	STIL
HECW2	ACSM5	PGLS	ID2	SNAI3	UBE2S	TNIK	SCN4A	NR1H4	PAX3	EGFL6	USP51	LINC00612	MLX	PHF1
NTRK1	TIFA	BRMS1	CCDC102A	UBE2R2	KLHL7	TRIM29	CYP26A1	FHAD1	GPR158	DRAM1	RSPH4A	LY6G6F	IL2RA	TFF1
PKN3	NAALADL2	ATP5G3	ATP13A5	UBE2S	RIMKLA	GPR87	PCDHB4	ARMC9	IER5	KCNS1	LOC283335	BHLHE41	NUDT1	CXCR5
LOC286437	ASXL1	HIGD2A	FASLG	IL7	UNC5D	PSTPIP2	ZBTB32	VPS18	TBX15	SRR	H2AFV	DCLRE1C	TARDBP	AQP2
ABCA2	DNAJC4	RPS12	IL17RB	MRGPRE	NECAB1	ZNF165	PA2G4	PTBP1	ANGPTL7	IFNGR1	CD82	FLJ25715	BTBD17	PARP2
LOC100128653	PRPF40B	RPLP0	TM6SF1	LIMD1	WISP1	EFNA1	ITLN1	BAAT	UBE2S	CD82	NCKAP5	OR1L8	EPS15L1	TERT
LOC100131655	SERPINA7	ICAM5	PADI2	ZNF250	IGFBP2	LONRF2	KIF7	CPSF1	DNA2	TLR7	PCDHB15	OPN5	ARHGAP5	DCPS
ST20	CCDC66	TUBB	CCBE1	SDHAF2	HOMER2	RAB9B	PABPC1L	IPO7	MGARP	OLIG3	EPB42	CDKN1C	ATOX1	SEMA5A
ZNF658	PLEKHA8	DISP1	RPRD1B	CYP51A1	AURKA	MOXD1	BRPF1	UBTF	HN1L	SETD5	GLIPR1	CUL5	PPT1	SDF4
APOL3	NAAA	JPH1	EFNA1	XCL1	TEX40	GRAMD1B	SHF	PPFIBP2	CTSK	DLGAP3	GNAQ	LINGO2	GCNT2	TFR2
RBM22	CPE	FILIP1L	ARNT2	TNFRSF9	ARG1	MPZL2	TIPARP	CYB561	RAI2	CAPSL	RFX4	SNORD42B	PDE1C	XPA
CILP	TJAP1	GPR110	RNF183	ARPC2	SLC3A1	LYPD1	ELP5	LBP	LBP	SAFB2	DNAH1	CAND2	NMT1	DPH5
HOPX	GPAA1	SMC4	SERPINB7	PCNXL3	RBM38	GSTM2	MANF	CLDN2	GAD2	LANCL1	PRICKLE2	CEP78	XPA	PRKD3
ZNF45	AP1M2	VIP	SLC38A7	SOAT2	LAMP1	KRT34	SLC35B1	HOXD1	MPZL2	TWIST1	COPZ1	EXOC6	RRP9	PRRX1
GPR87	TMED3	LHFP	MPST	FGFR3	SHF	FAM174B	SSH2	BDNF	GABRA3	PAIP1	SSH2	CCDC94	KCNS1	TLL1
TEKT2	KIAA1804	MYO16	PPFIBP2	SEMA7A	MORN4	RASSF2	SGOL1	RHPN2	ALS2CR12	CDHR3	SGOL1	SNAPC2	BTD	HESX1
LOC338620	DNAJC24	EML2	ZAP70	SLC52A3	SMARCD3	GSTM1	IGF2	FGF19	ANXA9	CPLX1	COL5A1	FAM184A	UTP3	REL
PRKXP1	NUTM1	ZNF516	NID2	KIF3A	GLRX2	ITGA2	MCM7	DUOXA2	CLEC4E	CCDC174	FILIP1L	TNIK	CLEC3B	TLR7
C5AR1	PPAPDC1B	HSPB8	GAS2L3	APEX2	CYP3A7	TSPAN13	SCAND1	PRPF39	NEU1	PAQR5	RHOJ	CCDC112	DMP1	RPL35A
DOCK5	CLDN23	IRGM	CCNE2	VPS13C	KLF15	EEF1A2	CENPT	RPS16	TDRD1	USP11	EDNRA	SMIM15	SLC9B2	ENSA
RNF183	FAM81B	STK32C	MLF1	ZNF423	NKX3-2	VGLL3	SCNN1A	MC2R	NAT8L	SNX10	CTGF	ANKRD54	LBP	KDELR1
SHISA6	FOXJ1	HMHA1	RAI2	DDIT4	RPL21	LUM	PLEKHO2	TMIGD1	TFAP2B	ICAM5	SERPINE1	INTS2	HSF2	SPA17
PDGFA	XCL1	LYPD5	NFATC1	HIGD2A	ALDOC	DHRS3	TRPA1	CCDC96	NNAT	TUBB	COL6A2	TOR1AIP1	NR4A2	MCM6
ZNHIT1	EFCAB11	MS4A8	ACTL7B	NMNAT2	ITGB8	TNFAIP3	TRIM65	CHSY1	CTGF	RTN1	COL1A1	PRRG4	NOV	MED12L
IFT80	GIPC2	GRK5	GPR160	ANXA5	IFT74	DEPDC7	PCNA	SMC2	NEIL2	FOXS1	CSRP1	DCAF4	NR2F6	TUBB3
ENSA	TMEM26	EIF3D	GTF2E2	ANXA1	ZFP36L1	HMCN1	PLD4	ZFP36L1	ARRDC3	TOP2A	COL4A1	KIAA0232	APOC2	FIGNL1
OLFML1	GAD2	SLC15A1	KNTC1	KLF10	AOC3	TMEM51	S100A4	FOXRED2	BHLHB9	HIBCH	COL5A3	KIAA0391	RBM38	NFIL3
SLC13A4	FTSJ3	CCDC25	NUF2	LMO2	INPP5B	TMEM45B	LPXN	LPCAT4	GYG1	PILRB	MMP7	SHC4	KIF3A	HOMER2
UGT2B17	OSBPL11	CHMP4B	SOAT2	KAZN	PYCR1	LSR	TMEM14C	AKR1E2	ITIH5	SLC25A13	KIF25	DMPK	ITLN1	HSF2
CCR8	C2CD4C	DNAJC21	IFNG	NCKAP1L	FGF12	WT1	SFSWAP	EMILIN2	POLR2G	TOR3A	TNFAIP3	TMIE	PTOV1	CIZ1
PA2G4	CDH7	FAM117B	JOSD2	HEXA	SLC7A3	HSPB8	EXOC3L4	ADIPOQ	PSMB10	LIPT2	ITIH5	IST1	PRMT5	FGFR3
ARFGAP2	IFNG	AK1	UBQLN2	LILRB4	SAV1	CXCL16	FBLIM1	SCD	TCHHL1	AKR1E2	MTOR	SUGP1	RPS12	ATP2A3
ATP11A	HAO1	CCDC173	MRPL11	TNFSF14	TPH2	F11R	CNNM4	UCP1	UCHL1	UCHL1	SLFN5	PCDH15	THBS1	CYP21A2
ANXA5	CRP	TOMM22	ZFR2	IFIT3	GBP6	FAM198B	CRYGA	TMEM217	ADIPOQ	EGR1	LILRA5	PPM1K	CSRP1	NSMCE4A
SERPINE1	SLC52A3	WDR13	LRR1	TSPAN6	INSIG2	INHBA	SIN3A	TPH2	SCD	CHAC1	RNF31	CLMN	IFT81	RFNG
GTF3C5	EPX	TXNDC16	RNF25	CD68	GPR56	LINC01085	FAM102A	MPEG1	PSMA1	TRIB3	HMCN1	TSN	RAD54L	NTRK3
SCN9A	PACS2	EXTL3	LINGO1	LGALS3	PDCD1	CCL26	APLN	SLC9A3R1	ZC3H12C	AES	AMIGO2	ASNSD1	DHRS3	PCBP2
EGR1	MTA1	AREG	ADAM9	GPR56	SLC22A3	ARHGEF5	PTPN23	EFEMP1	OAS2	GNA14	MAGED2	KCNA3	BROX	NFYB
FCGR2B	LGMN	GRIP2	GADD45G	FAM129B	TGM2	ZNF365	EIF3M	ACIN1	IFIT2	HMP19	TNFSF10	RAB11A	VIP	TUBB
COL15A1	IGFBP5	SDHC	ARHGAP11A	CYB5RL	MKKS	LPAR2	EIF3K	WSB2	IFIT3	SLAMF9	CXCL10	SLC2A12	KRT13	PRC1
PSMB9	LPGAT1	IFITM5	KIF22	S100A6	SP3	DOCK11	CLSPN	MBOAT1	PSMB9	ZFP36	ATL1	HDGF	SDC3	NUSAP1
GPR19	HRH2	KCP	SGOL2	GATA6	PLCB2	NPPB	SFR1	UBE2M	GRK5	TYROBP	COL15A1	ID2	CSF2	CKAP2
XIRP1	PRDM6	AP4M1	ANXA1	TAOK2	SMG1	LINC01088	RWDD1	MYH8	OCEL1	TUBA1A	RSAD2	BAZ1B	HLTF	DTL
CD44	POSTN	ARPP19	CTGF	MOB4	N4BP2L2	ARHGEF34P	CSDE1	CCDC158	SIGLEC8	LMAN1	SAMD9L	HCN1	UBA7	TRIP13
MN1	DRC1	SEC62	TGFB3	KCNN4	OR11H4	HHIP-AS1	CYP39A1	KIAA1377	PDCD1	GPR65	OLFML3	NR1H4	TPRG1L	TULP3
DNAJC15	RCCD1	PLA2G4E	SPC24	MBOAT1	ANXA11	PSG9	TAS1R3	UBE2L3	SFTPC	ARHGAP18	CH25H	CPE	HGFAC	KRT13
IGFBP4	PCDH1	FGF8	KIF4A	CYP11A1	NDUFA5	LOC154761	ZNF598	IP6K1	TIMP3	ACTN1	MAMDC2	RRAGD	GIMAP1	PRSS58
SWI5	ADNP2	PLP2	ASF1B	PHYHD1	ABLIM3	SMKR1	INO80C	TRIM31	TGM2	PABPC1L2A	MAOB	SORL1	BIK	CSF2
PHLDB1	SARS	TRIM66	RRM2	KLRB1	SLC25A14	SLIT2	CTDNEP1	PALM	ENPEP	UBTD2	MN1	HNRNPK	XIRP1	MAGED2
DCHS2	ZZZ3	FLVCR2	CCNA2	SLC15A2	RILPL1	CACNA2D1	NDUFB4	MYLK2	NPC1	LIX1L	LYZ	SPRR2A	CTSE	PTH
CDNF	EMILIN2	ZNF473	PBK	MUC13	CLEC14A	EPCAM	F10	E2F4	RNF216	ARHGAP17	CCL2	KRT10	IFITM3	PSMA1
ATP2B1	GARS	SLC43A1	PLK1	CD226	ARL1	FAM184B	SNX7	HINT1	MYL9	EFTUD2	LOX	RNF125	TSPAN32	PLEKHA7
C1RL-AS1	TINAG	INO80C	CDCA8	PCCB	SLC39A10	ZG16B	TMEM91	CDC73	ANO3	ARHGAP12	RNASE4	AP1M2	NR2F1	HRSP12
PRB1	ADIPOQ	ABCD1	CDKN3	AXIN2	AAK1	CLCN5	AHCY	NDUFA2	KIF3B	TRIM71	FAM198B	ST14	SEMA3A	STX1A
LOC440434	ZBTB24	MSL2	PRC1	HPCA	RGS6	EDN2	RHOQ	PHYHIP	SLAIN1	RPS6KA6	LTBP2	HOOK1	CLEC16A	C3AR1
LINC00921	KAT2B	PPP1CA	HJURP	TRIB1	RRM1	DACT2	CHRM3	RNF40	NRG4	MAP2K2	FN1	KLK7	NAB1	PTPRC
LOC101929719	KCNK2	UTP18	NCAPH	P2RY13	MED6	SLC47A1	CYP4F8	TMEM121	GPR83	RHPN1	MORC2-AS1	S100A14	TRAPPC1	ST8SIA4
OR8B2	OLIG2	SYT14	SHCBP1	TAS2R31	FADS3	VLDLR	PEX7	RXFP1	SLC7A1	LRPAP1	KIR3DX1	CCL28	SUV39H2	SLC35A4
DUSP12	LGALS3	MAFG	AURKB	APLN	ORC5	SLCO2A1	MYH2	LTB	TSPAN8	PORCN	PAK7	MACC1	SSBP1	NPEPL1
CAPN1	PDCD1	NDUFB8	ESPL1	GGT1	MRPS24	FAM134B	CAB39	PRR11	TP63	MVP	MXRA5	AGFG2	SDHB	DARS
TFRC	SLC15A1	FHOD3	SPAG5	KLHL31	NDUFB3	LACC1	OR10J5	MCTP1	DNMBP	NEK9	FOXD1	VGLL4	SEC61A1	TEAD4
TMEM200B	CYB5RL	DEDD	CENPE	GUCY1A2	KLHL26	MLLT11	SYCP3	AGAP1	POLR3H	PMM2	EGR4	CFL1	PCDHA11	SLC35B2
METTL1	CD81	HORMAD1	NCAPG	PHYHIP	ASB9	TIMP4	UBD	MTMR12	SLC15A2	TSPAN3	INHBA	LAMA2	ST8SIA5	MATN3
BCL2	ZDBF2	PRPH	BIRC5	GBAS	DBX1	HTR1D	LRCH4	RPA1	PTX4	WDR72	FBLIM1	FAM84B	COX6B2	NPR1
NRGN	PBXIP1	SRSF3	MKI67	ABCF1	MAP10	SCG2	NUDCD2	SLC51B	GSTA3	PCGF6	HCG4B	PRSS12	CALR	GSC
OR51B6	LTBP2	ECI2	CDC20	CD99L2	ZFAND3	HSD3B1	ATP1A2	HOXB6	TTI1	OTOGL	LINC01314	GPR160	SAE1	MTF2
ARHGAP39	UBXN1	DNAJC5	KIF20A	DPCR1	UGP2	CHMP4C	TAF6L	SPOCK3	FBXO46	MGAT4A	LOC100996624	AGBL3	GGT1	SUV39H2
CCR7	BLCAP	NUB1	KIF11	GAS1	STK25	RCAN2	TRIM54	TNR	ANO5	P2RY13	LOC101927543	GLS2	GLRB	BMPR1B
ATP5SL	CCDC25	NALCN	CKAP2	MUC20	PROP1	CA2	GABRA5	CCDC97	CCDC8	GRIA2	SPOCD1	PLCE1	FOXL1	CTF1
LINC00520	DHX57	MAST3	PLK4	POC5	SEC14L4	TMEM38A	ZZEF1	LIPC	TMEM196	GLRB	ZNF230	ZMIZ1	CHCHD2	SMAD4
HLA-B	PIH1D2	C9	CCNB1	PLP2	AHI1	GSTM4	ERP44	NR0B2	OSTN	LRRC8E	PRINS	CLEC5A	PPP2R5D	GUK1
ANKRD36B	ADCY10	SPTBN4	UHRF1	MYT1	USP2	TPD52L1	CFP	NUDT19	KIAA1377	IMPDH2	SIRPD	PIP4K2B	RNF38	ZDHHC14
AIM1	ADGB	TMEM218	CDCA5	SPOCK3	TGIF2	MATN2	LGI2	UBE2E3	PEX10	IPO5	SHD	RTKN2	IL1RAP	TFAM
RNASEH1	BST1	CMBL	CCNB2	RNF144A	RANBP3L	KLHL24	TCAIM	TRAPPC9	SIMC1	TEAD1	XG	GMEB1	SCG5	ANXA10
DCAF4L1	ADAP1	SLC2A2	UBE2C	NDRG1	ADM2	TEX2	RRAS	ARHGDIA	N4BP2L2	CCND1	EFEMP2	CHMP7	SLC22A17	MIF
MEST	DHRSX	ANO8	TK1	LRRN2	MAPK14	LOXL1	POU3F3	PPA2	SIX4	PPARGC1A	KIR3DL1	MMP7	CNPY2	SAMD10
TRIM31	MYH8	TPD52L1	CDK1	INO80C	TRHDE	PSG6	ANXA7	FH	BLOC1S1	BMP1	LOC101928590	PTCHD1	PRMT3	CALR
SLK	ACSL5	COA7	RAD51	MAP2K6	KRT83	SGK1	BCL9L	GINS4	PFDN2	TAS1R3	ANKRD2	FBXO28	FCER1A	SAE1
ST6GALNAC1	BTG4	NEK1	GMNN	PPIH	LRRTM4	OR7E14P	DRD3	FSHB	SIPA1L1	GPT2	HINT3	ST6GAL1	NOL7	CLVS1
MIA3	RPL26	SYK	MELK	CECR5	YPEL1	PPL	CCDC103	AHSA1	CD59	EIF2AK1	LINC00973	CDHR2	PLXNB2	EXOSC8
RNF38	MAS1	TMEM120A	MAD2L1	F10	CIAO1	VLDLR-AS1	SLCO1C1	SDC4	OSBPL6	RRM1	LOC646736	ASNS	PPA2	TGFBR1
EVC2	DPY30	SLC35F3	NDC80	B3GALT1	HSPA12B	IFI27	GALR2	SLC1A1	MEFV	CAMK2B	ECM1	SLC45A1	MRPS22	PTGIR
KIF21B	PYCR2	TICAM1	LMNB1	IL22	ARHGAP19	AK5	ANKRD31	ENKD1	HLCS	TMEM47	ZNF560	XAF1	BCHE	UPP2
GPT2	SOX9	ZNF563	DEPDC1	WFDC8	TMED2	EVA1C	G6PC2	TPD52L2	MAN2B1	NT5E	MAPK8IP2	EFR3B	ARHGDIB	WRN
ZCCHC3	EIF2AK3	MROH2B	NCAPG2	BACE1	MARC2	DNER	PARS2	TMEM117	CACNG5	MKNK1	MVP	WDR41	SLC9A3R2	PGP
SYT14	AREG	OPTC	DEPDC1B	HIST1H2AK	DSP	MYO10	ITPKA	LRRC24	MS4A5	PLA2G7	TNKS	CXCL16	YTHDC1	RBM15
FADS3	CERS3	SLC5A5	E2F7	IL21R	TECRL	HKDC1	DCST1	ALOX12B	SLIT2	ACTR1B	SIGLEC15	GPR56	ZFAND2A	MBD6
MAPK8IP3	LSM10	ARSI	FBXO5	ADAMTS4	DNAJB7	HHIP	OR10A4	TTC36	MAP1A	NUP160	AIM1	NKAPL	GABRG2	TSPYL1
PDXDC1	HEPH	DLEU7	GSG2	GLRX	GTF2F1	MMP12	NSUN2	SYTL1	CEP97	PDE7B	GBP1	CYTL1	IMP4	CD99L2
PAK2	LRRC26	CMA1	CDC6	MYH7	PRKG1	ZNF204P	VGLL1	PRSS36	PLA2G4E	PFDN5	DDAH2	CEACAM1	ATP2B2	CLK1
SEPHS1	LRGUK	BEND5	CKS1B	DHRS7C	KIAA1429	RASGRP1	LAMB3	TAF5L	RPH3A	PCTP	ABAT	TRAPPC1	NDUFB3	D2HGDH
AICDA	COQ5	CLDN8	ECT2	NDNL2	TM2D1	SLC27A2	ARMC2	ACTA1	KAT6A	ATP6AP2	LINC01279	GSC	SMARCE1	SCG5
TMEM178A	ARF4	BAZ2A	PLXNA1	L1CAM	MEGF10	ZNF385B	EPS8L3	HORMAD1	TRDMT1	CALML3	HSP90AA1	ZNF34	TAMM41	SERPIND1
DAK	HADH	CACNG3	TBX21	SNED1	BARX1	LYPD6	FOXO3	DDAH1	RXFP1	CHST13	NUCB2	CD24	CHERP	SOWAHA
INHA	GPRC5C	CIB1	SCPEP1	GDPD2	PIAS1	LYPD6B	MBLAC1	SNED1	HELZ	DAB2	LBH	AMHR2	MYOZ1	NMU
KHDRBS3	FECH	YPEL4	LHFP	SRBD1	ZBTB22	GDPD5	VRK3	PLA2G4C	IL6ST	SLC15A3	DKFZP434I0714	EML5	SKA2	ABCD2
LRRC4B	ZNF7	TMOD1	GABBR1	CISH	MUTYH	RGS5	SFXN1	ERBB2	PPY	CLPX	SLC17A1	CRYAB	PEX11A	FBXO9
PGR	NEUROG1	ALPK2	PPP2R5A	ID4	MYRIP	DAW1	MRPL36	MEP1A	NXPH1	RNF43	CD2BP2	IMPDH2	IFNGR2	REEP1
INSRR	NEK8	ATP2A2	FNIP2	ZNF559-ZNF177	TMEM86B	RGS4	BDKRB1	SLC5A8	RGS16	ANO10	PCDHB14	LINC00917	USP2	MARCH7
KLHL11	DECR2	VPREB1	VSTM2L	USP1	PPM1E	SLC12A8	RAPGEF2	SUOX	ASGR1	ZDHHC24	KIF21B	CA8	AMPD3	GNMT
CFAP44	CCK	GAK	CENPH	NR1D2	SLC6A13	TMC5	RPRML	MAPK14	BBS2	UACA	SLC16A11	EPCAM	CMBL	CSTF1
PP12708	TNR	DDX1	SH3GLB1	IL17RE	ADAMTS15	STAT4	KIAA2026	PANK1	RGS6	PSMD11	BOLA1	KLK10	COPS7A	PKIG
LOC100133131	NXPH1	DDX58	R3HDM2	SCYL3	FLYWCH2	PRSS3	P2RX5	CHRM4	SELT	SUPT3H	ATG16L2	SLC12A2	USP15	PRIM1
RAB18	LEPR	AP3B1	EOMES	AIM1L	MARK2	MAOA	SLBP	ESPN	LEP	GABRR3	LY96	ARHGEF38	RELL1	SLC9A3R2
FAM214A	KIAA1191	ARL5A	TMEM119	ENTPD4	DPT	MMP1	BCL3	SLC34A2	DNAJC10	TNFRSF19	PLSCR4	CAMK1	RNASEK	GPN1
LEPREL4	FCER1A	CLEC4F	CST7	ALKBH5	GREB1	ENTPD3	UBA2	LRRC4B	PKIG	HEMGN	MEOX1	TRIM66	DIABLO	TIMM9
TM4SF20	NFKBIL1	ESYT3	PITPNM3	S1PR5	CABP7	KRT14	KLHL22	SCN7A	PTS	GDPD1	TSPAN17	FAM134B	TIMELESS	ENKD1
TMEM184A	SYT14	SPATA24	MS4A13	IGSF11	RIPK1	ENOX1	BZW2	RETNLB	TIMP4	PPL	HCRTR1	CLDN7	EN2	GABRG2
C9ORF47	MOSPD1	FAM227B	BIK	MYH13	FAT1	PSG3	PPM1H	YRDC	UNKL	CCR5	SELM	FXYD3	SRSF1	ABCC1
EHMT1	SLC26A2	MMP12	IRF8	PLCD1	AJAP1	C5ORF46	SLC27A2	GBGT1	IGSF1	HIST1H2BA	SCG2	GLB1L2	STK38	NKX2-2
YPEL4	SCGN	MFSD11	CCL3L3	ITPK1	LRRC61	IL1A	CEP63	ATP1A4	GABRG2	IGF1	MIXL1	HMGXB4	CHL1	SH2B1
PIAS1	L3MBTL2	TNIP1	SYCE2	PRDX1	CDC42EP1	C9ORF135	DCC	TMF1	TMEM179	DUS1L	DOK5	MTUS1	WDR74	NDUFS1
CIART	DBR1	GNL2	LGALS3	CDKN1B	MDH1	C4ORF19	NUDT17	MAPK12	DOK5	P2RY12	CNIH3	CA2	ALKBH5	PYGM
LOC442028	PLCL2	RPIA	HLA-DQA1	SLC16A5	CDCA7	C4ORF26	SPATA4	P2RY2	CHRM3	ATP2B4	NEUROD1	NEU2	NPY	GBE1
LOC100147773	ARID1A	PRR16	HLA-DRB5	KHDRBS2	ISYNA1	HEY1	SIRT3	CLDN8	ACTA1	RAB14	MYH1	RASEF	DCAF12	NR1D1
KLHDC1	RNF169	SLC27A2	FAM129B	FUT1	MAPT	MISP	SUPT5H	LEPRE1	CASQ1	SERPINB5	RCAN2	GXYLT2	MAPK12	ACTR10
CDH12	DOK5	FGA	GPR114	ARHGAP29	RNF152		NARFL	PSMC3IP	MYOT	PTGER4	CTHRC1	ACOT1	PROC	SLC2A2
BTBD18	FDX1	ARHGAP22	IL4	ABHD12B	CCDC11		TCP1	MCF2	NEB	UFC1	GJB2	PUF60	TMEM9B	VNN1
OR10C1	GMFG	PDCD1LG2	FAM20A	FAM120A	COPZ2		PSMA7	MBD4	MYOM1	UBQLN1	MATN2	VWDE	EMC2	PDCD2
ALPP	TBC1D1	MYBBP1A	IFITM2	GAS7	CACNG1		FAM217A	ILDR1	NOS1	LDLRAD3	ZNF644	STC2	TRPC4AP	FOXQ1
VEPH1	ACTR1B	NFATC3	IFITM3	KISS1R	SELE		TSGA13	UCN	FHL1	DYRK4	KLHL15	CASZ1	SPTA1	PROX1
KIAA0040	DDB1	TLR1	RNASE4	HIC1	UXS1		FAM221B	ADAMTS7	MYH7	CYYR1	DUSP6	RPUSD2	SSRP1	LSM7
NAV3	SPINK4	CTSW	TGM2	PEX3	LIX1		SIT1	KRT84	TNNT1	MYH10	KCNJ15	CHRM4	FURIN	FGF6
ANTXR2	NOP16	NTSR1	TAOK2	COL10A1	CHPF		TP53TG5	TMPRSS11E	SPINK4	MEF2C	SLC46A3	SLC28A3	MAPKAPK5	TFIP11
TMEM189	RNPEPL1	TCF7L1	GPR171	ESYT3	TAF11		ANKRD7	ASPSCR1	ABCA3	WIPI1	ZCCHC24	PBOV1	VHL	DUSP6
RPS4Y1	GPR143	CHMP2B	DNHD1	ELL2	FFAR4		MAST4	JAKMIP3	JPH4	ZFYVE9	RRAS	AGPAT9	TXN	IKBKB
ESRRA	RANBP3L	CCDC172	CCSER2	ICAM1	GTDC1		VEGFA	MAPK4	TFDP1	BTLA	VSIG1	FGL1	DMRTB1	HERPUD1
FLJ16734	ADCY2	KLHL33	LAYN	BMP6	NEIL1		FBXL8	ARHGAP42	TRIM54	APBB2	CD6	PICALM	BLMH	PSMA3
LINC00923	CDH15	PHB2	EXTL3	ARMC7	SPRED2		TBCEL	FGF20	PANK2	BUB3	DAB1-AS1	LPHN1	MKRN3	PSPC1
SNORD114-3	GPR126	TAS1R1	AREG	SH3YL1	PTK7		CCDC167	SLC6A14	ATAD2B	CDH17	GAPDH	CYFIP2	TSR1	OSTF1
CAPN13	PNMA5	TMEM210	EXOSC8	RNASE2	PFN3		RPS23	MRRF	CDC42BPA	OGFOD1	LINC00559	OXCT1	CDK5RAP3	HOXA1
NNMT	IGFALS	LCN8	PIWIL2	TANGO2	RNF133		GJA1	FAM151A	CRELD1	TCF7L1	PPP1R18	KIAA1244	MEF2B	HEMGN
[truncated: 108 more rows]

## Sheet: down genes after TF pertrubatio
Downregulated genes after TF pertrubation
[truncated: 299 more rows]
